# Supplementary material for: Pyroptosis-Related Gene Signature Is a Novel Prognostic Biomarker for Sarcoma Patients
Source: PubMed Central journal article supplement (PMC8665299; doi:10.1155/2021/9919842), 2021-12-03

# Supplementary figure 4

A

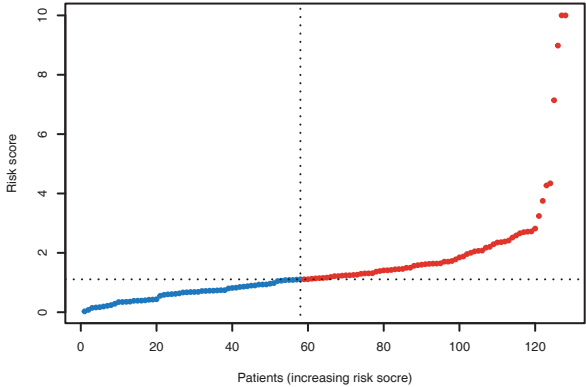

B

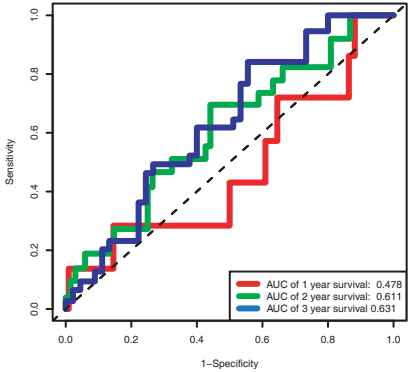

C

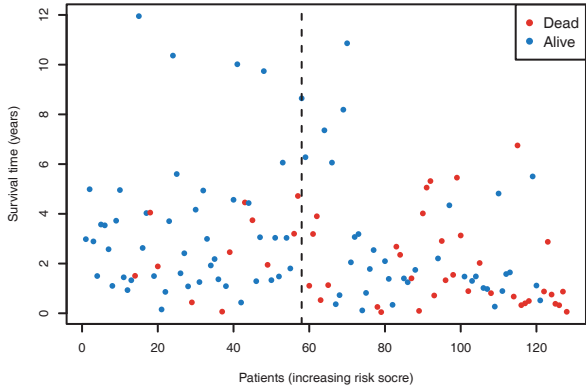

D

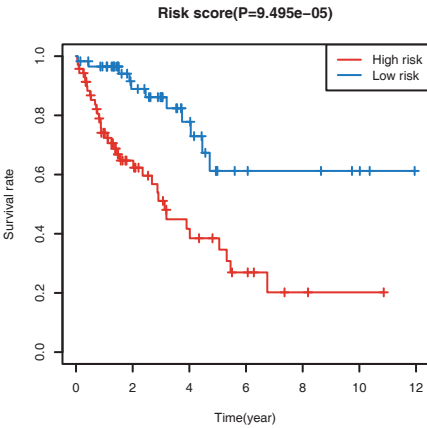

Supplement: 9919842.f4.pdf [file 9919842.f4.pdf]
