# Supplementary material for: Pyroptosis-Related Gene Signature Is a Novel Prognostic Biomarker for Sarcoma Patients
Source: Dis Markers. 2021 Dec 3;2021:9919842. doi: 10.1155/2021/9919842 (PMC8665299; doi:10.1155/2021/9919842)
Supplement: Supplementary 2 — Supplementary Figure 2: the group of sarcoma TCGA cohort. [file 9919842.f2.txt]

normal: 2
tumor: 263
