# Supplementary material for: Pyroptosis-Related Gene Signature Is a Novel Prognostic Biomarker for Sarcoma Patients
Source: Dis Markers. 2021 Dec 3;2021:9919842. doi: 10.1155/2021/9919842 (PMC8665299; doi:10.1155/2021/9919842)
Supplement: Supplementary 3 — Supplementary Figure 3: the gene mRNA (FPKM) matrix of the sarcoma TCGA cohort. [file 9919842.f3.txt]

id	TCGA-K1-A3PO-11A-12R-A21T-07	TCGA-FX-A2QS-11A-11R-A21T-07	TCGA-DX-A48L-01A-11R-A30C-07	TCGA-DX-A3UE-01A-11R-A30C-07	TCGA-DX-A2J1-01A-11R-A21T-07	TCGA-DX-A3UF-01A-11R-A30C-07	TCGA-IW-A3M6-01A-11R-A21T-07	TCGA-DX-A3LT-01A-12R-A21T-07	TCGA-KD-A5QU-01A-11R-A27Q-07	TCGA-SI-A71P-01A-12R-A33J-07	TCGA-MJ-A68J-01A-11R-A30C-07	TCGA-WK-A8XS-01A-11R-A37L-07	TCGA-DX-A8BQ-01A-11R-A37L-07	TCGA-DX-A3LU-01A-11R-A21T-07	TCGA-IE-A4EK-01A-11R-A24X-07	TCGA-3B-A9HI-01A-11R-A38C-07	TCGA-DX-A48K-01A-11R-A30C-07	TCGA-MB-A5YA-01A-11R-A29R-07	TCGA-HB-A3L4-01A-11R-A21T-07	TCGA-DX-A8BP-01A-11R-A37L-07	TCGA-DX-A3U8-01A-11R-A29R-07	TCGA-3B-A9HY-01A-11R-A39D-07	TCGA-HB-A43Z-01A-11R-A24X-07	TCGA-X9-A973-01A-11R-A38C-07	TCGA-IS-A3K6-01A-11R-A21T-07	TCGA-QQ-A8VG-01A-11R-A37L-07	TCGA-FX-A3TO-01A-11R-A22K-07	TCGA-DX-A48N-01A-11R-A30C-07	TCGA-JV-A75J-01A-11R-A32Q-07	TCGA-WK-A8XQ-01A-11R-A37L-07	TCGA-DX-AB2H-01A-11R-A39D-07	TCGA-DX-A6YR-01A-33R-A355-07	TCGA-DX-A6B7-01A-11R-A30C-07	TCGA-DX-A6YX-01A-11R-A41I-07	TCGA-DX-A3U7-01A-11R-A29R-07	TCGA-DX-A7EQ-01A-11R-A466-07	TCGA-MB-A5Y8-01A-11R-A29R-07	TCGA-UE-A6QT-01A-12R-A32Q-07	TCGA-HS-A5N9-01A-11R-A26T-07	TCGA-X6-A7WB-01A-11R-A355-07	TCGA-SG-A849-01A-11R-A355-07	TCGA-X6-A8C4-01A-11R-A36F-07	TCGA-MB-A5Y9-01A-11R-A29R-07	TCGA-FX-A2QS-01A-11R-A21T-07	TCGA-X6-A7WA-01A-12R-A355-07	TCGA-DX-A6BH-01A-12R-A30C-07	TCGA-PC-A5DM-01A-11R-A27Q-07	TCGA-DX-A7EL-01A-12R-A36F-07	TCGA-DX-AATS-01A-12R-A41I-07
MCOLN2	0.102616671763	0.243051641978	0.0613379418193	0.087509871682	0.288508418674	0.517770256885	0.244290069922	0.232068989643	0.35122766069	1.41897467089	0.617337371222	0.238109910757	2.16623789053	0.759475968949	0.0164429856638	0.854919855785	0.334544759398	0.17454757124	0.484169690285	2.53043612486	1.43355924707	0.725323881859	0.526605846129	0.285972223918	2.96372331161	1.19864095375	0.0379384405681	0.111514756927	0.581875225637	0.11906730447	0.219417353437	0.0901153408928	0.0200422820862	1.245546427	0.0683868047124	0.52962045336	0.290135579369	3.80058572696	0.0844213487808	0.226981073507	2.39012307666	0.0769417112207	1.2351921983	0.260193668149	1.7950742857	0.0643856987671	0.0204855202756	0.824773828725	0.136515290277
SYTL2	1.19292655149	2.82178080634	3.15019930803	18.3958485882	0.447778587213	8.64321625931	5.39036011437	0.915560070387	0.435480674892	1.49310443562	0.931363990732	3.55476767335	4.95561371739	1.03691036296	2.06975534722	3.56455718569	3.74916672387	1.42437247353	0.353574500544	2.1230685836	5.67410807551	15.738682242	3.40822351635	1.40440037645	0.325565777545	2.39947178481	21.6933688851	5.79909035881	0.750782435696	0.589619720517	8.60582574622	3.9045569552	1.94109840016	6.62460244047	6.494429657	0.0716587984257	1.7076229432	1.38412456399	0.416978717718	1.02815195995	1.85160561882	3.73296104735	0.531212493137	0.288691058322	9.48624634823	2.40896363223	6.25249863552	3.77523236909	2.42533723896
TNMD	0.0658148914675	0.627870828131	13.1264795614	0.482485777644	0.135695723576	0.129534937665	0.928470857885	0.0431423960223	1.10810283079	0.0387681687314	0.0583981540083	0.0345120249636	0.397769582246	1.36997553762	0.667912035058	0.55906823335	0.091304590605	0.613913639562	0.0883622520658	0.0473504553964	0.0125093444756	42.539038703	0.0919040345988	0.260401162626	0.0	0.100274100636	0.0579343888356	0.125476885695	284.450310711	0.190914438813	0.117272442629	0.63051225978	0.889099285725	0.0	0.0852852832681	0.113226931706	0.0936267820638	1.29679439386	0.0	0.0843930710247	0.0441452779194	0.0	0.269116211357	0.0195180692115	1.00385869374	0.0952957561589	0.0437957520426	0.722305108344	0.0437781642049
IZUMO2	0.0	0.0	0.0139725476997	0.0	0.0	0.0	0.0	0.0	0.0	0.0	0.0	0.0	0.0	0.0	0.0	0.0687343981846	0.0162144706457	0.0128262150724	0.0	0.0	0.0	0.0	0.379461479718	0.0	0.0	0.0118715568809	0.0123460444772	0.0	0.0	0.0113012812151	0.0	0.0	0.0	0.0	0.0129818763413	0.0172350723312	0.0	0.0215899960096	0.0160257159995	0.0112403081031	0.0117594138733	0.011684684316	0.0	0.0	0.0	0.0338464962312	0.0	0.0113180911009	0.0155488295544
HOMER1	0.711693474844	1.7955601322	0.0754753705935	0.069553755494	0.426006074014	1.16762081741	4.57876142842	0.318853433065	5.69882674302	1.91946217926	0.223059312336	7.54145788916	0.0854810322587	0.43142051545	0.114959287973	0.331903524199	1.811428281	0.0440893327335	1.47289564786	0.393311164077	0.687261840626	10.4659807701	3.24591191421	0.533158051525	9.06426564148	3.4774035553	0.212193877861	1.35904067909	4.99506443443	2.10886241407	1.296256862	0.861424596424	0.106493757221	2.00485675829	0.117935937701	0.418943327095	1.0042742743	0.33396433054	8.55822452125	0.480213578909	0.280068575425	1.11889301602	0.184815142711	1.12593632766	0.530727346041	0.720232613443	0.721839962574	0.644715546246	0.400861155825
NEURL4	3.00540448476	4.11851401257	4.70839982725	3.05242912442	1.81226867129	4.59384290868	3.93697225598	1.85187161662	4.2687433157	3.45467110065	2.88615602826	3.05513925364	2.116656371	2.46927009307	2.11893853927	3.13649058305	3.05357375965	2.21759645834	5.58973591634	2.40934772637	2.76803206251	2.9229961147	6.44801015518	3.08429772523	2.34068998317	4.9801719857	6.17092321095	5.53666249714	3.46632058038	6.95226979273	5.58469618403	4.52446196139	1.94266397017	3.3336469854	3.75780504202	3.25421909229	1.3956194781	3.33627024075	3.72838152861	4.35200500237	3.33194892017	5.80601737195	2.418311206	3.92928469022	4.57315664649	2.35126361374	5.58832376428	3.17918575276	2.26565599136
OR6T1	0.0	0.0	0.0193870703161	0.0145574877159	0.0	0.0174097378446	0.0	0.0	0.0	0.0	0.0172674064193	0.0	0.0	0.0375074076722	0.0	0.0	0.0224977641374	0.0177965206377	0.0	0.0	0.0	0.0171084303096	0.0	0.0	0.0	0.016471921439	0.0	0.0	0.0	0.0313613148137	0.0	0.0	0.0	0.0	0.0	0.0478277213818	0.0173024700554	0.0	0.0	0.0	0.0	0.0	0.0	0.0	0.0	0.0	0.0	0.0	0.0
REPS2	0.313829561604	6.64733133083	0.601028317823	0.946056518677	0.633877814029	4.32955753305	0.560019129083	1.46305968723	1.49944036237	0.449736120598	0.437229782543	1.65548487176	0.321510777622	0.265418545769	0.963210649463	0.618255105139	0.541509706164	0.359816665602	7.04695014574	0.192085195461	0.76030404444	2.8594780244	3.280200517	1.23282488362	0.673874710771	0.685101449662	0.270479993425	1.70565808152	0.346230898284	1.13076657246	1.75688343954	0.271733014246	0.176870348623	0.909953370492	0.65379603149	0.451266031412	0.832923255696	0.599900686577	0.556614162106	1.31536349185	0.406863660145	0.156091928224	0.440516899767	2.53092982877	2.82949116334	0.895245959636	0.370914513917	0.657697065622	1.90887142239
GOLGA8K	0.0	0.0107885039679	0.143755936438	0.0441590644084	0.0	0.0293395303509	0.0115663732683	0.0	0.0108979961246	0.0193180908875	0.0465594691196	0.00859863203211	0.0	0.0	0.0788255663718	0.0107147091362	0.0	0.0119965403741	0.0251604060355	0.00589865623555	0.0187001342672	0.184523237211	0.875840329725	0.0169248666516	0.00591248847399	0.0444145402588	0.0	0.0687773335085	0.0332075627842	0.0422809926736	0.0292182966006	0.0174546019163	0.0427022809908	0.0151933587139	0.121421325606	0.0322404138562	0.0058317517457	0.0201934286416	0.0224836182686	0.0525660957713	0.0	0.0	0.0	0.0145887146846	0.0416850432509	0.0263809222146	0.0218233242923	0.031757912077	0.0218145603126
PIGT	68.0373638527	45.1369322369	96.31934898	63.9935228606	92.5561386376	82.9816583018	120.493615307	71.1900175153	297.803386409	64.5761450427	124.697905361	75.6114687284	79.7967885273	97.5549599557	100.827541561	77.9217734027	69.1814030637	104.724461279	68.5033090233	192.241825063	68.5823265241	47.7363889856	49.4995773829	56.9364782597	97.325867261	100.719809193	112.251934731	48.4243622051	46.9151878924	33.8641169423	86.3364021337	79.8205235901	101.418396611	123.492645867	127.420709297	84.2510033635	106.263939361	51.9165066154	99.0036590614	77.2399066778	58.4500843219	74.7161690547	96.8761556083	64.0582951134	76.4325505972	71.9387017821	66.4890043762	74.1822185758	50.5978573875
EMB	1.35383539506	1.33277323957	0.4176720631	0.392030347335	19.5208999945	10.3361385074	2.81863847819	6.16703604391	0.698825450178	7.56314833666	6.19175953537	9.53905936329	9.65860513101	13.1231049243	0.376809298635	4.06975103392	7.3309116367	0.799990333165	0.421388940325	49.1092316325	13.5122574329	0.932085638136	0.911238904969	2.57973988007	3.63750304541	11.9461035737	1.45846545316	2.76299768141	4.44930806688	1.48121810495	0.121215357644	2.71948641119	0.482255736935	2.42476120865	0.906713806707	0.693533802726	1.77778683386	12.0883771685	0.142792574307	6.80398064962	7.98685655672	11.1871150281	12.8882835376	2.27147702941	1.65249042628	4.54963567908	2.79657162344	12.6318530041	1.8278792307
DPP4	0.958995716758	41.8270998829	1.21811103153	0.110772338649	17.6008428518	0.794855849006	11.8364973838	4.66967558303	0.733424913473	0.445477914106	59.8476034191	0.324467465682	14.6527148916	7.86903016802	0.406764471866	5.46692097189	2.69505607811	0.599713256345	0.442252277758	9.52357185417	1.02529674076	0.554208626565	0.184624545448	0.141923572363	3.21502095603	0.551495319793	23.20593231	1.02843951731	0.267752134547	0.248865087217	0.141352040801	1.78453529216	0.213470910677	11.8191712632	0.458180669344	0.0207963220542	27.1708089794	2.14921535442	0.12569101193	0.206833786817	4.80305735414	38.7689124492	5.01698379247	5.19134271487	0.769682616698	8.97121575183	1.59772744051	1.23934792218	2.40149173604
USP11	17.6670326947	14.9446660899	38.6909259838	38.4097034028	12.4502974465	100.344531457	25.2461384988	13.6703833985	28.0074177605	48.1541270616	14.446654817	42.8675506127	12.440774019	18.7793482537	29.2221439514	21.5770612297	20.1524544204	20.0240951499	75.2375480021	19.8941109573	30.8847144457	29.5537239921	31.3257753763	35.5566939576	26.9744129684	35.5660420961	76.517198654	23.6026094216	80.254716115	42.4653481131	43.9950272756	22.1077175391	33.8446778936	26.325915289	37.2767421738	19.700927396	10.06667822	25.0442109814	19.6650925355	19.4145507098	24.4590519172	19.5186231464	13.5219212712	27.3059788603	38.911233527	14.8310991214	35.583445917	23.5313832772	37.7763432342
SSX2IP	1.5679444964	5.25951557051	4.92682480167	3.80408436696	0.823036137963	3.13609251634	1.06199429602	3.08944550656	5.93989860678	1.97242426236	0.548519482446	12.3908716181	1.12518742518	0.723390640598	2.64672875201	0.721317344532	1.65905059732	2.41834506661	4.75206647873	1.91048865439	2.35926902894	10.1382926188	17.5108489027	2.39904254351	6.26013444665	2.43352761986	5.50641586676	7.8127262753	1.91056112655	0.642409616011	2.7264587245	1.1326165714	11.0317764232	6.36043344721	8.42842498472	1.118376442	1.93680312798	0.683489940811	11.0857459129	10.1444593825	3.10984294897	4.85175306117	0.833803888439	8.33707808297	2.18263832204	1.72269223745	4.37889081642	1.53813762041	1.86833792808
SPACA5	0.0	0.0	0.0	0.0216572460691	0.0	0.025900552613	0.0	0.0	0.0	0.0213171966043	0.0	0.0189768989725	0.0	0.0	0.0	0.0	0.0	0.0	0.0	0.0	0.0	0.0	0.0	0.0	0.0	0.0	0.0254847994605	0.055196116385	0.0	0.0466563822843	0.0	0.0	0.0	0.0	0.0	0.0	0.0	0.0	0.0	0.0696069899333	0.0	0.0	0.0	0.0	0.0	0.0	0.0	0.0467257804739	0.0
LCE1F	0.0	0.0	0.0	0.0444064541249	0.0	0.0	0.0	0.0	0.0	0.0	0.0	0.0	0.0	0.0	0.0	0.0	0.0	0.0	0.0	0.0	0.0	0.0	0.0	0.0	0.160531514786	0.0	0.0	0.0	0.0	0.0	0.0	0.0	0.0	0.0	0.0	0.0	0.0	0.0	0.0	0.0	0.497716368699	0.0989106890837	0.151707668167	0.0	0.0	0.0	0.0	0.0	0.0
RAB3D	3.14663325529	2.87652608757	5.56850470997	7.01671237484	1.12861462642	9.73070333492	6.24400330497	2.33129611469	5.97353290133	3.19361237822	2.01367200462	6.75842257479	1.13918614793	0.980219628081	16.1705019014	2.82941822596	0.876389018116	4.03667151833	3.12418675688	3.67191150346	2.36190697437	8.29266571738	4.19994883946	1.76627096044	3.24802828727	3.20421571445	3.17179302174	6.39395211195	2.84205463813	7.0245688611	3.74026609811	1.91518515253	3.53751950737	1.30031691522	5.27139125765	2.39963166787	0.618552532058	4.09904428428	5.69600097203	7.90566470407	1.15050569791	0.691512686042	1.42234954814	8.35936323995	7.77934143231	1.3469607936	1.53250428701	6.28776461426	0.494672441809
FAM241B	8.09049922316	5.15500551217	5.77503315262	7.30958544422	0.412235542744	6.33847385859	7.34121741135	0.437660259129	1.18328486906	0.520525171347	0.0696968331752	7.29050537723	3.64523829542	1.52905940047	3.94373248745	0.667234881908	0.181616494779	2.25554078798	11.3442983212	1.79424529557	0.836058189713	5.13770347358	3.79785417995	3.82397852603	3.29952358077	2.19403795683	0.221258688867	0.958423891922	5.71331317499	0.886090818476	0.787285810644	0.0836112954654	4.83256712519	0.606495453479	0.0581634252088	12.8956158542	1.38279955459	2.2248098779	7.32369281329	5.55225392497	2.51577361249	0.248669831006	0.782885790914	0.663889255575	2.4086438404	0.151644346346	0.0522692074044	5.0201984572	1.6371107909
DCUN1D1	2.65786694964	3.88481369476	2.91890873333	2.28034426871	2.21699993455	2.41159638952	3.27640003828	2.46476324208	5.1430224407	4.20526557321	2.10798453067	5.43291562738	2.96636713246	1.5101012034	3.6062602909	2.37461875313	2.81931325024	2.2670380883	3.39446763612	3.9965878312	3.9863497704	4.15279079154	3.256313884	2.69780805074	4.70768399761	3.29885473438	2.36845037839	3.47263098563	2.30437273589	3.48954464333	4.76117822126	2.95655683393	2.91950195421	4.12582591503	4.82462051222	1.50148172038	3.38455196437	2.00885005905	3.88612182378	3.55349806906	2.81777755583	0.904605979389	1.60959455348	5.84438790336	4.05678238834	2.27379087865	2.20033044544	3.50896613622	2.22039393224
HIST1H3I	0.0	0.0	0.0	0.0	0.0483234052105	0.0461294513692	0.0	0.169000626754	0.0856725680741	0.0	0.0	0.0675965452451	0.0	0.0	0.0	0.0	0.0	0.0	0.0	0.0	0.0490025416199	0.0	0.135005014329	0.0443505629776	0.0	0.0436445801631	0.272333915402	0.245763729889	0.0435091789764	0.0	0.172270650212	0.137216104115	0.0	0.0	0.0	0.0	0.0	0.0	0.0589169267039	0.0826477155412	0.302626084034	0.128872686142	0.0	0.0	0.0409624010778	0.0829554838691	0.257340002878	0.0	0.171491105523
CHI3L2	0.326943879161	0.296210736562	24.8288356146	4.11843918936	0.705228402536	4.15433859126	1.05477952618	1.49669416974	14.4015976944	0.227314421818	0.239689418758	0.754629778018	2.82512978711	1.35118870959	3.23778107116	2.36398351268	0.609713305598	16.8688979286	0.203541576079	0.503215348056	2.37768660141	8.92256303432	54.268983781	1.13406879626	23.1268179924	0.179651423597	4.55756386345	0.349469311085	0.0	0.228028643492	0.143253894259	0.188271322217	1.50742291828	0.148982525052	0.214313245967	0.885197499468	0.154398945991	14.8410025711	0.0734897022012	38.5660326792	1.43442008511	0.219689796073	2.83536797417	0.0429160580994	101.749037885	1.2365150569	0.0641983254524	5.26284022841	0.727288834166
CCDC121	0.931451962576	1.86299710292	1.80391781172	0.880728006811	0.453923969831	1.04662275264	0.486190304186	1.28221203368	0.61904756467	1.67893161104	1.08434940818	0.757074176308	0.434273752769	0.545756520497	2.60695327771	1.14423599528	0.620254813815	1.65592119085	0.843231899109	0.502599111209	1.01266750303	0.615795209941	0.94949729135	0.987033942723	1.61880566545	1.32453013849	0.990466193377	3.14676087146	1.27011921835	3.44046525313	2.72192473205	1.1104661928	1.55848123064	0.609881933016	1.51048513299	0.677609837425	0.198759387029	1.17000469937	0.800350403052	1.66019034499	0.587284314374	0.484224164596	0.266608623593	3.58548441252	1.44439994011	1.00701657001	0.718995662049	1.40108337105	0.801316913254
GOLGA6L2	0.0	0.0	0.0	0.0	0.0	0.0	0.0	0.0	0.0	0.0	0.0	0.0	0.0	0.0	0.0	0.0	0.0	0.0	0.0	0.0	0.0	0.00614887148751	0.00610418711651	0.0060158684435	0.00630470305593	0.0	0.0	0.0	0.0	0.0	0.0	0.00930624072466	0.0	0.0	0.0	0.128921753923	0.0	0.0215329927198	0.0	0.0168159460829	0.0	0.0	0.0	0.0	0.00555628608679	0.0	0.0	0.0	0.0
STRC	0.0	0.010541204887	0.0766149252723	0.0153410950745	0.00480486743474	0.00917343873847	0.0316434818204	0.0	0.0113580663613	0.00943763633384	0.00682383171308	0.115941116887	0.0027666325123	0.0	0.044499687705	0.00837528129163	0.00296359805802	0.0093772400989	0.0221253008076	0.0115268890148	0.00487239496934	0.00901467550848	0.0201356214669	0.0220492093671	0.00924313548299	0.010849112403	0.0112827344896	0.0146619900304	0.0324463636615	0.0103279520479	0.0285485412835	0.0	0.0146032038401	0.00197934526852	0.0237276099573	0.0252011073351	0.0136753767197	0.0	0.0820147565633	0.0102722302793	0.0	0.0	0.0	0.0	0.0244377116385	0.00412419304103	0.0170584639624	0.014480639842	0.00568387116406
MCM10	0.19428304962	0.0159780236159	0.975495953924	0.523204756521	0.520739181231	0.517954065346	0.685202640812	1.21305359113	3.02789852391	0.157357963933	0.106881256566	1.50779708624	1.7738816766	0.486791685383	0.358010286871	0.729961661199	0.93885471497	0.341129346084	2.9586935226	2.94579476429	1.07827154838	1.2741828138	2.54680251361	1.17309434648	1.29596673927	1.07219705129	2.71237888735	1.59643684915	2.05905155248	4.00136221135	2.21557618051	0.398100297666	0.360485468611	3.29725134232	5.71492711331	0.243518868521	0.991522900354	0.735710584594	5.20792576361	2.32309181071	1.29663600959	1.46320356008	0.287977537318	2.49767943438	0.530934003849	0.0968954730451	3.10926552432	0.35745993115	1.39139217281
ACTN2	3.60871103215	0.132370846786	8.30374865713	5.82522740997	0.0323233771923	0.565690550561	0.0101367862649	0.44589577661	1.66612230263	0.0169304028004	0.0442051849329	0.502390236813	0.591439491866	0.557656474703	1.1564979208	0.0375615463497	81.0185698588	1.48945292299	0.562290714321	6.04152851623	0.27314707874	7.03129570111	1.3177758885	0.0494432587264	4.51845413009	0.171918605731	0.131562396925	0.142471856289	0.746981005642	0.00617585385752	0.418246971022	0.0203963178269	0.26197038585	0.118359836057	0.248298925971	0.141277726722	1.92853393814	0.395245284996	0.315274809226	0.509830292994	0.363080940862	0.0	0.0636596101232	0.0596659963871	1.76879795945	0.0431578530002	1.05830494493	0.544283521701	0.556555311179
CIDEB	0.165669129554	0.152597619914	0.409310886054	0.485804941843	0.198733403792	0.278637464696	0.286300289159	0.141177352837	0.0403716573132	0.121983958055	0.429239214546	0.19112193937	0.20025297918	0.127722223124	0.256614437616	0.259806568247	0.038305292598	0.357549795963	0.38765553361	0.220502394306	0.20782410006	0.116517076968	0.381712113683	0.0854975674662	0.197125471721	0.218755151793	0.0991659926473	0.328484204828	0.0111834099808	0.443191863988	0.361617534358	0.105808290415	0.14560736737	0.225135360455	0.361889085037	0.0	0.0707031515585	0.153013527066	0.227156255866	0.111527897567	0.222244832552	0.0441664990655	0.0	0.132653294031	0.463267080107	0.0959513242126	0.45199462044	0.411765461324	0.036732772759
TSNAX	4.39173705089	7.67136531903	8.01741249653	5.17429467998	6.4092119783	5.06409131914	12.4370240933	4.98880182941	7.41164491858	5.78562583462	4.64305092377	6.70404794491	5.86727660914	3.50469493742	7.08252955416	6.43459401602	4.78930932186	6.8534797341	10.2251591799	6.15334000458	6.52833043382	5.72276582661	7.45636090353	4.06561276818	5.49130443286	6.79174983855	4.82438156593	5.77471126693	3.37531118008	4.03580323284	6.06193394709	3.99406375674	6.98311355531	3.45827964023	3.89420720604	9.03819785888	5.96278161087	4.27056071205	14.1735094	8.26209652792	4.41008921448	6.17279723748	4.58634328433	5.25664980828	4.70996070947	3.79406695046	3.25383981848	5.83116178025	2.18717794044
PCDHB9	0.440008202299	0.228963087948	1.81237710501	1.83845737503	0.679274937886	3.3280596823	1.38818485456	0.468043695012	0.287114681138	2.37155381439	0.391843015706	0.745682523521	0.243481833753	0.481080290297	0.781971043251	0.635143203338	0.943377366878	0.667230457103	0.317623769034	1.87779679711	1.00358093166	0.953708769471	2.29153811297	0.450025112306	1.35864565832	0.979170851583	0.194365609838	5.70591572148	0.712860695456	5.17508576573	2.3413981057	0.108576321569	0.464851566134	1.97915607629	0.186603813447	1.56312151472	0.678582104771	0.827569242288	0.965303467736	1.89267948528	0.169031919191	0.567857131643	0.343481279954	0.494671427955	0.480470872529	1.22787268751	1.12594265812	0.584903054059	2.96937917391
DTWD2	0.66938653061	2.9406664797	1.28495083395	0.861843000817	0.31832532945	1.13747014296	1.26674333824	0.601769613133	0.277095182814	0.878728364249	1.01413194544	2.20235605697	0.198152488448	0.265403294055	1.99198028079	0.307426518081	1.45397830841	1.18372880545	2.08207264506	0.829709815402	0.868067766201	2.82472523825	3.09262948569	0.560621086528	3.68659215534	0.761497249214	0.359602277507	1.28640305555	0.898567735274	0.747108437306	0.521401357173	0.525237212049	0.564046771498	1.41765192418	0.887949657072	0.400475589075	1.06924543021	0.890282213621	2.86886001966	1.50822682974	0.400242870631	1.15103377917	0.30499254406	3.35884538033	1.2944810763	0.420922270002	0.122176583563	1.26308376821	0.447800902791
PTPRO	0.0845553732645	17.5957221125	0.244286368261	4.08819908149	1.5214642447	2.5441996746	0.593939189728	0.926092641838	0.561959177738	2.10227987196	0.845301434984	0.227238206661	1.36275361599	1.13806972697	0.0865624021189	0.520278288302	0.498538365113	0.922753973778	0.313539684149	1.06204760294	2.75087455913	4.17768345573	0.226307115387	1.24849872492	6.77849071582	2.59084768952	1.21074320044	0.300917569205	0.44235971486	0.208939181311	0.0690548929033	0.345020303818	0.389930208136	0.794332394897	0.203486897437	0.121223141406	1.96969257266	0.893766684124	0.782578829725	1.94258954217	1.18629792925	0.387440759441	1.07325255922	3.07386876542	1.01877561026	0.167775507807	0.829929209973	1.03032862761	0.349961367621
AL672043.1	0.0	0.0	0.0	0.0	0.0	0.0	0.0	0.0	0.0	0.0	0.0	0.0	0.0	0.0	0.0	0.0	0.0	0.0	0.0	0.0	0.0	0.0	0.0	0.0	0.0	0.0	0.0	0.0	0.0	0.0	0.0	0.0	0.0	0.0	0.0	0.0	0.0	0.0	0.0	0.0	0.0	0.0	0.0	0.0	0.0	0.0	0.0	0.0	0.0
NME9	0.0	0.228467784871	0.118609660529	0.0636159876509	0.0106264952068	0.11665642156	0.0149963691934	0.0	0.0376794280133	0.0250468505849	0.0352138681473	0.0929045615828	0.0244748539103	0.0	0.0757045969167	0.0277842899029	0.334270551747	0.0362929044465	0.0380586478935	0.0254929886264	0.0323275194314	0.124605943065	0.153388522165	0.0975285253279	0.0306633230489	0.081579636597	0.024953013918	0.12970644364	0.0621908890506	0.0959339096408	0.0757659039457	0.0452614918069	0.0738207971542	0.10068343732	0.0734667234145	0.104503187369	0.0	0.0349090251156	0.05182419877	0.109047226605	0.0285208256221	0.018893052971	0.0796891403011	0.0168133180474	0.0540466993354	0.00912110857951	0.00943166944737	0.0137252292564	0.0314262726815
SUCLA2	11.3935848427	25.2443496205	9.0240046605	7.94613588356	5.82088098977	6.03087728478	7.87698417553	9.0256277435	10.2944665801	8.41411738681	8.25224711067	7.25013655988	5.8415497405	5.8089510756	10.2513890606	12.1028298171	8.10363488913	10.7376335047	9.11348292153	5.53275009241	10.8164106144	6.77807688549	5.59782990233	10.4876206356	8.60767205947	12.5421421927	4.06166942853	14.2997148067	3.9100213008	20.372297512	16.1154990253	10.7810413317	10.1358456603	8.56569000389	8.67497248215	6.32154561884	7.30302634725	10.346908906	10.9781994728	8.01998065977	6.91971777985	10.0219010521	2.23295602563	8.40919556039	7.97062795253	10.3663483509	7.6543153234	9.09481673726	6.31254628391
HIRA	3.82044804971	6.35692080837	2.5242696118	5.09629911548	4.22720199592	5.50385839309	3.41197922115	7.19393683288	7.57904296567	5.45184699869	4.47031823998	3.95180347256	5.25108588426	4.10450917064	5.06198021257	4.62233898016	4.28565922064	5.39171238088	7.89011809735	4.97854407248	4.16480568842	5.3522643754	4.55616015209	5.07536948509	6.1100184012	4.95702532382	5.54569154596	4.58170135659	16.4180809006	5.21542166964	2.27830840145	8.32359781883	4.13608318933	4.68173859546	6.02293835781	2.53819013922	3.35297238105	5.88858980254	4.33152475857	2.24005299914	7.53889212312	7.39652476404	3.91803844465	2.30984249641	7.78923067473	2.26822175084	5.8554278673	4.18093023303	5.11529365979
JADE1	4.12055002938	8.38890031064	4.8890203067	10.0199814643	2.06245500332	7.89811093898	2.00384281067	5.13012426706	5.21865030916	2.39130889388	3.30397039845	5.90397955808	2.00682139712	2.14541016047	6.64294279283	5.01711413788	5.4829261795	10.5149715803	4.5081300142	4.22549260524	5.98972736386	6.8675195797	7.99676595936	4.16915696455	8.91233901359	2.37364555987	3.46368825529	6.58787324822	4.93040640068	11.4907785335	4.4622042382	3.19693681943	15.1588326313	5.22319013406	7.18530146426	2.48469177661	3.0857019264	9.84499324557	10.2705582015	8.1376358471	3.0460797872	6.80383974686	2.56292731026	5.56091792157	7.50398073218	4.45931388115	3.18223225379	19.1285794345	2.40115725699
NIPAL1	0.0147587574882	1.11861440975	0.0247012597392	0.0105987659185	0.0	0.326391118972	0.00936928431302	0.0029023590839	0.0392349718407	0.166917604299	0.0157146962984	0.204314879527	0.0	0.0307212186692	0.00945959496155	0.040503857017	0.0245696792368	0.0	0.478955011615	0.00637090365939	0.0134648468031	0.27714627679	0.123654935404	0.0792127888983	0.0734371980558	0.140912979276	0.0530056567752	0.0776601884889	0.51707055871	0.0799155282717	0.520699053726	0.00942601016069	0.00288256455543	0.0410243540069	0.360641428495	0.0478796819683	0.0535384636697	0.0708828834392	0.0202363838169	0.201549639579	0.0237586152265	0.00590190807335	0.0	0.0630267586773	0.225111774601	0.00284929833446	0.235705033557	0.314420846044	0.0981709905426
HTR1D	0.00622939301955	0.0	0.0372354842579	0.0391434669694	0.0210168460757	0.0334377504634	0.00659099683066	0.0122503099816	0.00414008530023	0.0165123681634	0.0	0.142095806486	0.0	0.0	0.0	0.0488454676811	0.0	0.013672247601	0.00716871886248	0.322684584924	0.0568325773708	0.223441531091	0.0521924147104	1.06089362551	0.0134767197598	0.0126546190103	0.197406065662	0.0213775434888	0.163999677793	0.108420545499	0.474519050268	0.0397854100821	0.00608338050622	0.144296713711	0.0138381764738	0.0643017143022	0.00664634564033	0.0345211470588	0.0	0.0778812599888	0.476332998784	0.0124554201068	0.0764157143359	0.0886746848128	0.0237538579795	0.00601317528575	0.460125740596	0.00603232298182	0.0
CYSLTR2	0.0723245053294	0.220618077977	1.78033718673	0.424952902765	0.162673205478	2.81635242017	0.24000332186	0.0775792154831	0.107058814125	0.601278275926	0.0910106748618	0.0982616198472	0.374667551408	0.402981207859	0.0579453018619	0.109554510187	0.186988583576	0.295829058061	0.196726086133	0.42927877028	0.528619934738	0.315604678937	0.0550876752435	0.427538766634	0.0355607785917	0.848144508851	0.357679065548	0.0676902484632	0.0432743006834	0.0731112111075	0.144980567686	0.199463990513	0.0449458995331	0.076150629816	0.0511203671116	0.00484776513261	0.0140300743785	0.607268875103	0.067614082861	0.0537471694421	0.373759792064	0.0788781444591	0.16635033867	0.51769026277	0.300858618192	0.047600573162	0.0328142036432	0.286512883248	0.0656020517219
IFT80	0.947627421048	2.22748925755	2.30987147955	3.55728190068	1.36465969811	1.07017112581	2.9167572316	1.01405675724	2.9968562823	2.97295120264	3.6769756716	2.81693881807	0.946747044015	1.07877838857	2.25598221649	2.01684127408	2.14439594585	2.12576772639	4.51220146821	3.11311920894	4.27502270865	3.82748610661	2.53912915102	2.00953482573	3.16834394547	1.96504627782	1.17259203003	3.98404414141	1.11405934969	3.02731318261	3.57223301462	2.1654422407	2.25464919074	2.57934951021	4.10629323454	1.4191634799	0.643398679183	1.07756497575	3.00365472042	2.90209245946	1.44871881562	2.03746369689	0.569902806123	2.4569916784	2.01322636812	1.88887035378	2.01460459396	1.43010193618	1.42439197681
TIMM23B	1.76834448246	0.826956833517	1.98966153055	1.33319625638	0.922856863512	1.41449562464	1.88933641643	1.31827125018	0.998578820288	1.24077803115	1.52599574165	1.20456114617	0.576284301503	0.294045311849	1.86124805099	0.792979635251	1.57133925673	0.868820779939	1.5029678869	2.3947926656	1.62122086813	1.7619052014	1.30123452129	2.13535770137	1.43774462031	1.90179544268	0.634851705932	3.02101204803	0.573449839925	1.9110185482	3.13548367347	0.950387653062	2.40975322477	1.47247808151	4.62789873179	0.434604682235	1.15915225765	1.69730855737	1.64020791007	2.25083859464	1.34310130162	1.94118700539	0.841813737872	1.93315745711	1.2285101263	1.82411128363	1.24594328619	2.26081832591	0.722664416533
ARHGAP25	1.34428404665	1.41297543045	1.27403135362	0.735663122344	4.74301490151	1.50922501073	11.2825728249	3.70738150411	2.92352138663	5.83010469214	2.77648303384	1.21534298475	8.74261354375	7.19217613295	4.28731850669	13.8299105882	1.53687129124	2.32124144649	6.15067400201	5.05478270315	6.82663287444	1.76332310955	5.61451979527	1.8087659627	1.83954629241	7.35020519932	3.45245177254	2.92725698671	3.76865942235	1.69133664612	1.02161677598	3.76523808512	1.79676191518	1.39861945305	0.795130401416	0.30092777704	2.3432025579	14.0015796939	0.55518288874	3.1743953685	7.78592906312	0.693009796828	6.70041737302	7.9309519091	5.64478716599	0.909900846132	0.769518354167	7.26160794896	1.15489131152
ZNF562	1.23691550017	1.24348062833	2.75288945936	2.09026474746	1.4185280429	2.17184706112	1.30727940137	0.866438421229	2.39579546002	1.91588283995	1.36329406258	2.27691273791	1.87271582938	1.18074368994	2.87835431131	1.93497168711	1.28838660411	2.33482770792	2.20623702475	1.52239886758	1.83640292938	2.21447302365	3.20229776587	2.12032652677	1.70955510894	2.60787355634	1.78129872535	7.42404103123	1.44905937399	2.29879980695	2.14654236569	1.11430194737	1.91331834626	1.66312085621	1.8338270181	2.54875938604	1.2690038859	1.86851315123	3.61910369536	3.29706054416	1.2458559713	1.60443373243	2.12149883327	3.93556123167	1.89621558583	1.05636700697	1.10046633659	1.78550174655	1.71235325755
FCRL3	0.0135059109899	0.00799732096674	0.00322920152557	0.002424763555	0.136699507398	0.0347981728591	0.0743074910352	0.0424957219919	0.0143617520051	0.0334136786175	0.0891603507664	0.0212466963106	2.35084378372	0.815287012486	0.0	0.799556899367	0.0449679996556	0.0385355372694	0.0	0.883258360968	0.0308045956038	0.182378274527	0.0311184699592	0.00278802101312	0.62236040154	0.570677251298	0.0114131986571	0.0216293132729	0.0	0.397000284374	0.0	0.0862585175764	0.013189342104	0.0475530283516	0.0240019763251	0.0238992300022	0.0144099035564	1.75137532482	0.0148148405478	0.0285752769931	1.36429705261	0.00540090486431	0.0662705873791	0.0528701446522	0.0180252107526	0.0156445566856	0.0053924105834	1.43341944602	0.0
RGPD6	0.0	0.0013095520445	0.00158633402767	0.00238231334024	0.00298458479848	0.00284908024836	0.0	0.0013047422345	0.000881895095511	0.0011724538218	0.00282578790152	0.00104373657284	0.0	0.0	0.0	0.00260118906146	0.0	0.00145618836685	0.0	0.0	0.00151326505416	0.00139988583719	0.00555885099196	0.00136960563407	0.0	0.00404341177708	0.0014016735446	0.00151790356878	0.00134362255311	0.00384917783065	0.0	0.00211870985016	0.0	0.0	0.00442158279773	0.00195673561442	0.00141576300927	0.0	0.00363886946807	0.0	0.00133507208374	0.00397976361893	0.0	0.0	0.00126497459185	0.0	0.0	0.0	0.0
OR8K1	0.0	0.0	0.0	0.0	0.0	0.0	0.0	0.0	0.0	0.0	0.0	0.0	0.0	0.0	0.0	0.0	0.0	0.0	0.0	0.0	0.0	0.0	0.0	0.0	0.0	0.0	0.0	0.0	0.0	0.0	0.0	0.0	0.0	0.0	0.0	0.162763714327	0.0	0.0	0.0	0.0	0.0	0.0	0.0	0.0	0.0	0.0	0.0	0.0	0.0
ATP4B	0.0	0.52708149678	0.0567540848769	0.0	0.02669478433	0.0	0.0	0.0	0.0	0.0104866854263	0.01263723494	0.0	0.0	0.0	0.0	0.0	0.0164650975441	0.0	0.0	0.0	0.0135349762136	0.0	0.0497195886103	0.0245001093868	0.0513528232782	0.012055055408	0.0	1.35764641108	0.0480706251594	0.17213947496	0.206192223137	0.0568506237817	0.0	0.0109968060046	0.0527301482572	0.0	0.0	0.0438474246916	0.0	0.0114140494245	0.0238823580142	0.0118652943558	0.0	0.0	0.0	0.67593666947	0.0	0.0	0.189470011747
UGT1A6	0.00681865992681	7.6713761014	0.0	0.0	0.0	0.0	0.0	0.0	0.0	0.0	0.00363015551943	0.00268167761542	0.0	0.0	0.0	0.0	0.0	0.0	0.0	0.0	0.0	0.0	0.00357059593881	0.0	0.0	0.0	0.0	0.0	0.0	0.0	0.0	0.0	0.0	0.0	0.0	0.0	0.0	0.00629777682829	0.0	0.003278784854	0.0	0.00340840888059	0.0	0.0545978422538	0.0	0.0	0.0	0.0	0.0
PHETA2	11.1755082029	2.53148218075	10.6553189365	19.5916166411	16.1982775045	13.9235284059	12.7924229919	23.5710883335	18.6903568125	8.52468691038	16.2800996587	17.4502922307	14.5759588043	18.7896273936	19.7776915851	13.743168559	27.1489909978	19.7599539066	11.7163803749	11.827036789	9.67971136091	21.5120188161	14.9263438649	8.53023637177	23.8498350853	12.3757759518	7.61112737865	15.9075612779	7.15728656903	14.059503908	8.26182205217	18.5455038539	16.4301534156	8.75911077248	37.5105623076	2.44377996216	13.8069898993	11.2867671999	0.197591651369	16.7415744568	23.4158189274	18.916154758	20.5170230321	26.7765054886	38.8914182884	24.6285896378	29.4875315415	16.9969744805	8.66537349523
MMP26	0.0	0.0	0.0	0.0	0.0	0.0	0.0	0.0	0.15254695034	0.0	0.0	0.0	0.0	0.0	0.0	0.026467297568	0.0	0.0	0.0	0.0	0.0	0.0569757816732	0.0	0.0	0.0	0.0	0.0142621354779	0.0	0.0	0.0130552262355	0.0	0.0215580347062	0.0	0.0	0.0	0.0995496723715	0.0	0.0	0.0	0.012984790171	0.0	0.0	0.0	0.0	0.0	0.0	0.0	0.0	0.0
OR13C9	0.0	0.0	0.0	0.0	0.0	0.0	0.0	0.0	0.0	0.0	0.0	0.0	0.0	0.0	0.0	0.0	0.0	0.0202512131394	0.0	0.0	0.0	0.0	0.0	0.0	0.0	0.0	0.0	0.0	0.0	0.0	0.0	0.0	0.0	0.0	0.0	0.0	0.0	0.0	0.0	0.0	0.0	0.0	0.0	0.0	0.0	0.0	0.0	0.0	0.0
CCT8L2	0.0	0.0	0.0	0.0	0.0	0.00920349733628	0.0	0.0337180862116	0.0	0.0	0.0	0.0741757235566	0.0	0.0	0.0	0.0	0.0118932355076	0.0	0.00986568833745	0.0	0.0	0.0180884277739	0.0	0.0	0.0	0.0	0.0	0.0	0.0	0.0	0.0	0.0273766110638	0.0334881237576	0.0	0.0	0.0	0.0	0.0	0.0	0.0	0.0	0.0	0.0	0.0076272066579	0.0	0.0	0.0	0.0166035297606	0.0
ELP2	4.76771446339	4.91622709759	9.602495802	9.11252696314	4.20079622756	4.97276569393	5.15927129577	3.38102412629	3.83037190785	5.61401122832	6.37283837826	3.09374204626	3.22576827597	4.44326550541	5.8550132246	7.13466323857	3.34916864523	6.96910333196	5.89978502477	6.3161178021	5.57727111643	5.4792344937	10.8838461502	6.98787037508	5.80105024594	6.42770152015	6.95596871316	5.72578419394	7.92326207362	10.0470227941	7.17542745764	5.36799738858	7.87992072178	4.63191668776	4.90922063337	6.31525564517	3.53762976076	5.19637145284	4.09779787924	6.12121404173	4.77764543756	11.4486754406	4.00276323673	4.07564901053	6.55290348749	3.75047903523	6.19234263521	6.44633393081	4.53201038218
RAN	33.0001094635	27.4960082809	36.0422432607	31.3185053879	39.083819906	43.5452651627	35.8102791109	51.3026796388	80.5082789385	46.6993727427	24.0654859114	38.9468738171	98.5168084144	29.4596006225	26.708977182	29.9985452105	36.828802591	63.0174648243	93.2935067008	69.2941529959	46.2657522094	48.8964505136	78.743710175	39.9997773454	50.7414000674	43.3967603574	46.9600186422	50.4144282042	121.243661037	49.4096019946	22.603230347	37.0108518556	39.6434491205	117.272765355	68.8030405859	24.7468312602	75.4710936831	45.0629752671	88.0868741711	50.3891131313	81.3446280195	90.6965099738	39.2362721255	29.5516714748	40.03894301	27.2580974465	42.1459456403	51.230474971	41.6177458259
C3orf58	3.69492581257	3.28755916636	8.91904872845	9.19636056538	3.34092012699	12.0900777456	6.41919487664	2.56658729316	33.4958818764	3.53490169083	5.02062350835	26.7239559951	2.33427748284	2.98134674057	10.5570950312	5.93075846653	6.31366723455	7.92947378122	35.2944955322	6.16181564042	13.7643825901	22.053739483	44.157736325	3.67086384711	5.5426233667	3.30185924394	4.04239916909	5.6846265999	5.54686128958	2.98141680473	3.21735140353	4.07525827425	10.3534878847	7.53896286906	15.3471543368	1.67064924201	3.73619832344	5.66003366866	32.4409354639	56.3722489816	2.58415209428	4.53374908402	0.755096094673	10.9443117776	12.4356608993	12.7785235118	10.1455369861	14.2778554635	14.0743034715
PCDH11Y	0.00302610164675	0.0	0.0	0.0	0.0	0.00162433212069	0.0	0.0	0.026145106878	0.0280747040954	0.0	0.00119012080602	0.0	0.0034994488481	0.00969786782984	0.0	0.0	0.0	0.0	0.0	0.0	0.0	0.00158462019902	0.0	0.0	0.00153683365722	0.0	0.0276926368703	0.00306413169282	0.0	0.00404405056187	0.0	0.00443275798539	0.0	0.0	0.00446233623927	0.0	0.0	0.0124476646035	0.0072755763981	0.00152231617225	0.0	0.0	0.0349994164322	0.0	0.0	0.00302052607902	0.00146518468587	0.0
CELF1	7.24613067115	9.04409452848	13.1374427424	12.0906300286	5.26149827141	8.77051602303	12.946148213	8.87948894512	16.7215769241	8.75335012111	6.40074194706	16.1395281458	9.04486733003	4.75116761488	14.1993299548	8.92254909149	10.6227176434	10.6526365848	17.1661087274	9.28011784142	6.9846855203	21.9697217158	12.6428232789	7.66413918924	18.6403518479	11.0108366022	7.7613992149	9.72456079189	10.9886659075	16.4809145988	11.1913554756	9.97635066639	9.72080914484	16.7566172306	12.5140898884	4.36489225282	10.8802575088	8.48290814864	13.4398137719	11.1264516731	8.69108309257	10.4113849837	7.27246545588	7.79658163498	16.4453349537	5.72109196251	8.08369499702	14.1304291526	7.05435996232
ALDH4A1	4.93570057359	206.117507765	12.899869645	19.8969563805	8.32338888891	7.49836795448	3.97110685706	1.97701871715	7.47371812134	3.85346033884	1.59547745998	4.14209787277	2.44279476438	3.62062900361	16.2472120622	2.13026948352	2.80266399877	19.3961716773	8.65490174544	3.65258897154	5.48678363481	3.16157670373	6.3925185356	1.709654692	29.1856650752	4.02132335693	7.44374447218	2.21786943121	4.42572915333	6.24909690612	3.42276424704	2.8358428804	6.17111047178	1.8896024301	10.0763325325	8.28775714265	3.58562149716	17.9339651646	5.27094878581	5.28998028456	2.61060263066	1.26350428636	4.93294611329	2.64919827457	14.9187862916	4.76900710139	7.3301789543	3.00866401168	3.2735323038
LSM2	36.4193047134	16.4416800471	27.7775675364	29.0272250044	35.019392952	22.8144188008	17.6965511005	25.410350504	51.3186637506	24.0800002913	37.7131699869	23.8096120969	49.1413479719	42.6470195366	18.5240080974	45.2267872638	15.8329111805	66.4008509708	21.4177956377	35.1972817575	27.3769965672	17.5412402374	28.9714242401	24.1348598452	36.9826154048	26.415547819	38.6954380131	14.6870869465	59.5245562907	32.5827899791	20.6208128258	32.9891976217	26.982503801	33.9115766494	38.3023571625	113.139672325	29.2870572669	43.2846142933	66.5964773117	47.4829543102	35.7019299169	41.573347346	41.0094562769	25.8657911357	33.0458180372	21.2735756739	61.8363893824	39.8403007006	29.4060273014
TYSND1	3.12330816795	6.3239689735	2.50300699759	2.58298346483	2.21636974653	3.66646352226	4.84513539478	3.38079375398	2.75236869449	1.40189897947	5.77993093313	0.982076194378	6.76649583025	4.34489498391	1.9944908806	2.1764098517	1.79073784837	5.67036170559	4.27510299803	7.35062516004	5.84004338906	1.47119474883	1.63753417314	1.91123237481	2.2814192718	2.86023431666	5.33228266075	2.41700635813	1.90220388982	3.77036751246	1.97146277276	3.39209134127	1.75577715642	4.82674861564	3.16188184194	4.31676137716	2.24206814662	6.06748396668	5.44136331351	1.83991397885	5.72440951293	3.96357099358	4.03516986207	3.95791797657	2.05088236503	1.86901574403	3.33612735948	3.8615396581	2.44806630797
CHD1L	6.93649186405	7.43409731951	16.2596418522	21.8684555388	6.2594841209	16.7802438045	21.0986476804	9.14533175395	41.0799963915	20.0876186836	10.5272359498	9.32381814232	10.6499977901	8.25138526758	10.6705674203	14.3768227953	8.22232636554	13.9038374941	22.9540318244	17.545615873	15.1229304134	16.0593733906	23.3880591366	8.52551555243	13.1730943732	10.541717457	8.26649594632	11.2258698601	17.7021785821	18.9477428144	6.36865611406	11.5263966132	14.6665781113	35.9303176817	26.1580270773	5.79315400284	10.649075803	9.3731663067	29.9673199126	11.399876529	10.6421371923	30.572983435	10.1789958579	5.90132522718	14.4368803645	8.1348589951	12.5316044056	11.8029653651	12.4082653546
PTP4A3	17.3656834676	6.66984351907	55.4121082047	16.4041331154	31.6863471309	45.1870925769	17.8346601102	3.53694168849	11.8105754559	10.3431304667	9.11124872902	26.3674809702	2.95734840606	3.93264582779	24.4229660713	72.6558504943	19.9355761231	5.240861918	18.7833515801	5.57116702392	11.0535733168	18.3072870617	23.2015760339	8.21752574028	47.6020858916	9.58933775584	14.1743318826	19.1906363939	91.7981520433	17.0821713474	21.7635254768	21.3763087911	3.54279207072	4.84584175506	11.5225546077	36.9134752604	6.28079663012	11.9173551105	43.2029406816	18.5485087307	13.0746820388	2.53449616079	15.6153699464	23.6254118054	21.6632583986	12.9588316587	9.28874867531	18.9800217732	11.081591914
STX18	4.57737715094	8.30909249497	3.06868017067	2.58073788042	5.52023307587	5.67140495083	5.10241055471	5.47779779052	9.7053747771	6.92121238137	4.08741078012	3.98600295822	4.95011264627	4.3204988302	3.31173819886	5.32403688664	8.16056183397	5.4557383482	5.09607579384	7.75281563134	4.7328349383	4.08472116087	6.03225799488	5.5176525419	5.96170450708	5.93781566373	4.82465681729	5.26640514811	6.94900013933	5.63656699405	5.30271806766	9.61436595675	3.7261504244	6.4200887893	4.43669014871	5.03065643682	8.14548175117	10.0155675656	7.03920258003	5.33221918233	6.52154994889	11.1026042721	7.35908803348	11.8400224463	4.94141613077	3.99007787228	6.78398827542	5.17346930027	8.7905272892
PTGDR2	0.134206301426	0.204690900672	0.0218782586261	0.0383322034053	0.0686042125786	0.124430012346	0.0903615420411	0.143957010561	0.0648684867767	0.0485104287493	0.954824947091	0.0335881279223	0.150108210226	0.874758256032	0.0	0.071749689573	0.110017563694	0.0401666548692	0.0702014437829	0.065832671147	0.0278273500598	0.0900984899827	0.0638883832919	0.528897698183	0.039592228517	0.13631581825	6.13452134412	0.195388532198	0.0308847539884	0.176955812602	0.220113690893	0.642853892959	0.0774449010559	0.0226089773193	0.0203270623333	0.0269867298367	0.00650859754416	0.056342804785	0.0501862318659	0.0176001093717	0.380533820545	0.091479575137	0.0	0.0542730421944	0.0639692626158	0.0412198492386	0.121780934004	0.118146014877	0.0486928113091
CYFIP1	6.83078606296	10.6708477386	19.8697718789	12.1980913515	15.304770436	18.9701278109	14.0867747449	9.17430466901	16.525994872	23.637033258	12.4374273198	15.9626151914	15.6570686317	11.1585978478	11.0976163904	11.2793385028	10.5655648713	9.72742540457	21.0336778506	13.3578276369	21.7181391322	10.9918724074	31.2707471056	13.4531432222	18.4043508597	26.1799964733	22.0960112334	7.11737331209	17.0288550961	34.9838192115	19.0163870321	12.8886161632	12.4205759567	26.1978512401	15.4886886299	4.54625592698	13.3510653928	10.8104659288	10.6890433124	14.1512467642	13.3783951869	12.5135081245	13.1264571865	13.3433197912	16.6399350542	7.19446051035	5.46403944271	14.1900550875	9.75506750706
FLOT1	101.632811071	69.0315073928	88.2537776803	71.9410481496	99.0116086245	61.0967208827	72.9003348605	72.0754254902	47.2690730607	86.9397174099	50.6639362179	36.6723033247	78.0554138092	76.4155686866	48.4785150381	80.8325224118	48.354177538	97.0967106006	45.0289709939	81.318908189	53.2200362636	30.6483030327	30.7100389311	55.9600954221	76.0712291406	94.8750568597	46.4263934849	42.9081719288	52.8834814984	65.9573632087	65.0696417548	52.5900745855	64.9635440067	59.9523496987	69.5042936118	42.2429567178	46.4435931604	59.1935278825	50.4210171095	56.2085401296	63.1098731596	91.1150924858	60.4663624337	68.608279972	109.383496437	80.7635687722	121.214572391	82.99070585	60.4907692369
GMPR	7.33473350272	7.83204061141	2.56339283361	5.52585797822	3.55930457733	5.67417052621	1.21388621065	6.19282807418	1.58808997827	3.55149079771	1.58386677914	1.94176527551	2.83847447187	20.1482836996	6.37727791161	1.9853319122	9.76929120952	11.5309972106	1.66629354366	2.15177271096	2.3009459563	2.82972057609	3.53837738943	11.9233865682	31.1026932988	3.61651662239	1.5796465214	2.55237525284	6.30526366675	1.50717673632	17.3201467435	0.59377318172	5.69470645735	1.45890959661	3.17259725347	15.3546271007	5.09048436554	14.2211814083	1.09574397151	5.86682140421	5.52478548728	0.450881185521	10.87075162	1.71058562223	8.54600115282	3.10090720683	2.66944134706	6.09130839807	0.810510605807
TRIM47	28.862441278	13.8287933174	35.6466952072	14.4100780949	20.4614247473	8.63482547986	14.3025365423	9.58325530484	19.1933274038	17.0096574178	35.7471419456	32.0750662945	31.6506598527	22.756258738	10.6726856518	27.0056400419	16.0708575001	8.88217434855	47.0243544492	14.5699099394	10.6853769439	31.878004247	24.4823558495	11.2315612855	31.135501139	8.24390834294	22.1934805985	6.15954929849	6.77841712862	2.5598049384	2.61399602786	19.3849408958	10.8352519074	12.6656325647	18.385737308	1.8814697977	18.2486926914	38.9040252825	24.9547124641	6.03254671763	25.2502348914	7.09706230293	29.2948134919	9.40622469459	30.086440332	3.52666414953	4.95956923433	27.1492548184	8.7860536956
BANP	1.19373137904	1.0802641173	2.60686552088	2.03289561162	1.17042754253	1.79275054873	1.33825944616	2.23098457322	1.90034006873	1.19563567719	1.33987994936	1.75757203265	1.33111581467	1.15370287336	1.20844709793	2.07394333608	1.44082862375	1.64340966657	2.99047358199	1.45566831307	1.42769227867	1.47757471872	2.80730046144	2.49090423985	3.78988347022	1.64584159104	1.57050543088	2.73596562257	3.37528985472	2.29391602533	2.36125974193	1.92321026747	1.37407132492	2.09831295131	3.20464966912	1.02313159616	1.33800279602	2.1055751611	2.91606438945	1.8546576942	1.8319132304	2.44498027472	0.726886301722	3.04809085984	1.44199046898	1.98220185385	1.27326156622	2.08449658587	1.62820300969
STK31	0.0	0.0112753214687	0.00682921545341	0.00512796510516	0.0128487268585	0.00919903178687	0.0211545094783	0.0	0.013288046706	0.0151423463507	0.00608255073287	0.00673997576316	0.0036991348826	0.0	0.0274608232193	0.0167972951087	0.0118874648936	0.0	0.00657393432804	0.009247238378	0.00651465133617	0.0723186049768	0.152560251514	0.285965371863	0.0278067689366	0.0145058405685	0.0181027396459	0.0653462028042	0.02602950882	0.0220944343083	0.0152683675103	0.00912110929831	0.0	0.0291113894038	0.0158625385344	0.0294833187848	0.0213321574046	0.00527615784741	0.0313308838755	0.0219752295568	0.0143688131672	0.0314105026712	0.0	0.035576360992	0.035397397535	0.0110285310918	0.0	0.00553182456848	1.69091949672
ZC3H4	4.84559017401	4.71773878221	7.40983846022	6.46363873101	5.19890573049	7.98374376436	5.61828754371	5.57906756066	8.31275578429	5.85817020901	6.14274572048	7.62706728251	5.53677884361	5.36482838813	8.41726602358	8.35397790965	6.0025536415	5.95540774021	12.2496282905	5.62201089107	6.06183747977	8.77110700376	13.0454045543	6.85445385779	9.15792541661	8.76204886063	5.43694012974	9.6690149175	10.7975702965	13.1919306377	11.0600565909	7.84094435365	7.34204708995	6.38473677154	4.23566958981	3.17216516142	3.57605492536	7.01920256456	9.62710012652	7.05015393148	6.67069300507	4.94203561406	3.31938104551	6.77343342662	7.86625519978	4.70362186582	7.29837145658	6.85433136156	3.93498500558
VIPR1	0.251128733355	0.33989047333	0.406009991812	4.98522586304	0.320077116121	0.390276149233	0.04554964359	0.145804237911	0.0413279641766	0.0443781075571	0.0738518366914	0.0921808521595	0.0433646416181	0.669327410829	0.0421563057424	0.0750145725221	0.0663598730923	1.39631346674	0.0495422160824	0.00774318457356	0.100918425029	0.295210784268	0.723896740562	0.098743669468	0.442396505196	0.0825960676056	0.0	0.298211520458	0.065387508004	0.111004783853	0.0223737206871	0.126019909271	1.13979350796	0.00886416432008	0.0903210881848	0.0846441851323	0.0102071451194	0.291587749466	0.0295143163431	0.420922442375	0.108285664452	0.0358658410105	0.022004186431	0.00851140071249	0.282720450776	0.203164540938	0.0381967284879	0.145910488376	0.79862738971
SNX11	8.12492683309	7.44325994639	5.92508868805	5.6888288227	9.46780939874	3.32811327137	6.33730925298	8.20566936656	6.22660907194	11.8221412596	4.5055001748	5.20819571401	13.0532622061	13.728460108	6.88232883893	7.83396777002	6.01970541294	8.76041871555	5.75996421813	9.86753420427	8.15990159984	11.211715174	7.80655450852	6.30855395645	5.96513028069	10.0832414865	7.92030251718	5.52943856771	5.37559164013	5.8483503484	5.85772761392	6.85007449547	5.64835806744	5.51794474742	8.03989994292	5.59697742002	8.80983620497	12.2854501475	11.0598639139	5.65194860024	12.8409994977	4.21559496374	16.1983275325	5.80814113656	7.35329625005	4.77477134067	8.02685288511	9.16260678937	3.38145648253
SNRNP40	7.0077059995	6.14342615902	11.0757768238	8.97021815337	7.04164526903	6.17969433357	5.69567588912	14.2372685951	19.4096821026	12.267038734	6.7881195652	9.83579372624	16.2595106806	8.6037750543	5.51238701767	11.2305087737	10.548726838	14.636429932	17.537436717	23.8759882608	9.05549544887	9.40915176243	17.7570032528	9.09290532312	6.31032384248	8.28721848687	27.8164780308	9.37474961428	20.282855915	10.1023029279	9.29813190207	11.3707106942	7.39448145717	21.9033934307	16.6386511413	4.56291989663	19.507529652	10.4987071577	16.7962882526	11.8245434628	21.2571570382	20.5488676868	10.0616074886	12.6595122267	7.62609929141	7.16419247775	12.4997883593	8.85706974064	11.2234985366
FAM205A	0.0	0.00412516642845	0.074955690796	0.0637876378898	0.0	0.00448738568349	0.00442259787336	0.0	0.0	0.0	0.00890139909617	0.0230148237479	0.0	0.0	0.0401870461455	0.0	0.0	0.0	0.0	0.0	0.0	0.0176388928825	0.0175107095508	0.00862867757813	0.0180859174054	0.0	0.0	0.0478148605844	0.0	0.0	0.0	0.0	0.012245952948	0.0	0.00928549829665	0.0	0.0	0.0	0.0	0.0200995331878	0.0	0.0	0.0	0.0	0.0358627033341	0.012104628593	0.0	0.0121431732451	0.0
CPLX2	0.0	0.0	0.00892203954397	0.0	0.0	0.0	0.00263212790744	0.0	0.0	0.00219808253478	0.0	0.00195676715705	0.0	0.00863056070328	0.0	0.0536429747019	0.0138047979409	0.00273001985835	0.00572568473733	0.0	0.0170221534913	0.0	0.0156323597377	0.00256769705364	0.0	0.0	0.0	0.0	0.00755695417354	0.0793796006803	0.0	0.0119162879542	0.0	0.0	0.00828945562122	0.0586949019127	0.0	0.0	0.0	0.0023924645082	0.0025029545517	0.0	0.0	0.0044265518285	0.0142292268007	0.0	0.0	0.0	0.00330951985585
SOAT1	2.70010172511	6.71774961206	1.88671481134	2.91262598227	8.38666666721	5.31561422741	9.65616319401	8.11597463843	6.9735880486	10.2891854356	9.65309397631	8.78281767623	12.8969902024	8.47232102579	3.53477245347	4.06238445824	7.07546492358	4.77524473117	9.70471072474	9.77550320647	13.5244496539	7.61467291624	16.6368770241	6.03179052786	11.3283228519	10.6910529931	6.47394671827	9.74184269812	5.62889521674	4.90713246239	3.80379989726	10.2687889891	4.33313852589	9.59603426861	3.89792095519	2.1934182202	12.0585915601	10.4596857955	13.7580485887	6.62634695945	13.0987011575	28.9520906156	10.391228101	4.80445423585	6.68134478565	10.2381455519	13.4882163393	5.94712126364	4.29638466038
NFASC	2.52895316511	5.18989222729	2.34737947407	4.7013013401	0.0513539831124	3.29074246914	9.32385136677	0.013061775675	0.642836266629	1.5075269693	0.176806032539	1.81679340478	0.0215051017622	0.0345644400917	18.2181370324	0.240874680664	0.32250567631	6.04891864318	0.189178551036	0.0215037092346	0.0634376845746	4.00282254594	3.71548448089	0.229661314036	0.137407610818	1.61998726063	0.255209821009	0.271623744945	0.589322225757	0.783527161585	1.10399481377	0.0994237790738	13.6229485928	0.00230782483215	0.680566216066	1.82299032962	0.0336613612822	0.108889867045	0.0216295557628	4.34443694529	0.0292368296126	0.00581020666683	0.0980276453913	0.108583081197	8.53055915912	0.177918862752	0.0546957901844	11.9376186443	0.00994069545907
SMIM19	8.70824911757	8.87770191789	6.49095461268	6.77352796954	8.63773719705	6.91805292871	4.43181161893	6.16930412941	10.0153471056	6.97110170139	16.2311449144	2.49327257269	8.63329653577	10.624278387	4.09545070962	8.24511133174	7.43579393351	14.4349658663	3.30704878294	8.2981789824	8.05899713885	7.25766946728	5.75026165196	6.62430768237	7.26733608244	6.43040908235	6.28728098405	4.01445600323	5.20243629684	5.72575957738	7.05239345263	18.7082283491	4.40514140769	11.8690023815	4.57504238991	6.45918329836	13.6997553715	10.4317952933	3.31342346297	4.22090196944	20.0464838962	7.83530680537	14.1407929364	2.48309203735	5.89410170538	5.9682543757	9.90042062847	7.66537811094	4.12424270146
NENF	81.9428382332	45.1106986382	52.6754921682	98.2721334971	85.8904377088	124.104584667	132.829675295	78.791004424	77.25518872	27.6111112286	79.1748394222	60.6624009492	80.4831699837	162.689436307	75.8623449843	43.801193974	24.4433957583	173.796114143	103.543936145	37.1913732073	32.4073038491	55.4766640746	68.4354677992	50.3977639493	54.4818216729	21.4923141732	27.5004761512	36.6809472596	54.4602749493	35.0214244693	34.7010468804	31.1981495627	93.1863201356	33.6096306092	46.4301761878	382.521082085	94.124783423	45.5758989627	104.551425213	105.584304548	46.2637917674	63.9656646482	126.400325999	17.4080259775	61.8125474682	55.5846193782	44.2257743265	77.3595191818	34.7432782065
EFCAB2	0.681216370148	1.86093796668	1.46195674059	1.09592157	0.632263501147	1.54413876652	1.49796426749	0.639554567732	1.55595199531	0.605530238573	0.491570379679	1.32180815025	0.682937144376	1.26470821349	1.15731720359	0.559088219523	0.688859738033	2.02202963344	1.98345382818	0.881295015944	0.851745815789	1.11695568645	2.25635776823	0.453213595461	2.84318154785	0.706512804641	0.424811798326	0.917729224049	2.52849142613	0.527742390342	0.633420386577	0.537290245254	1.43068641651	0.882136256928	0.989099218755	0.27836434006	0.352460180359	0.917234939104	0.506410391258	2.59487612292	0.538813966379	1.20411438908	0.220237866126	0.481930994403	0.83326861335	1.13094434239	0.393230593453	1.05109390736	0.58414967256
BATF3	1.12614705249	0.199149897886	0.622558631012	1.91078696944	1.9619338139	3.33340971344	7.98247943284	3.5907338289	0.415320905017	1.90954308425	1.54564609168	0.768029306001	16.6838168772	4.52417724659	0.511102299317	1.86303239291	1.02949038946	2.97885417483	0.397027590373	3.91989514551	0.85370627706	2.56838339369	1.54073912777	0.597972444953	2.04904011261	2.5389466346	0.309424730641	0.335082947608	3.43408182949	0.258063277758	0.55675232623	0.685979366059	6.03909493121	0.940901800309	1.22190894236	0.316768305068	1.36820892311	3.77569479054	3.26672967798	0.926519579974	4.02132077354	0.989179806936	2.14602323445	0.793420664575	5.68424655664	0.546671440602	0.480816982893	5.2319784712	0.407014828036
FAM167A	0.0175445352776	3.5010024379	0.0251689086917	0.00629966386751	0.0670843696018	0.0489707249484	0.0185629604758	1.96315902901	0.0233203692155	0.359643512431	0.0373618231486	0.027600019964	1.12700064431	0.499106371495	0.0168677001753	0.0550275783334	0.68150389835	0.0269546745124	0.060570190667	2.52195506176	0.0280111886033	0.0111053530343	0.113921378075	1.00683620598	0.0075911981957	0.23166400935	16.6199983015	0.192665482347	0.0568480748955	0.0339285434454	0.426723265686	3.40638365043	0.00685332157168	5.34170780274	0.046768802269	10.5503743616	2.38103714887	0.181488088849	0.0192448693625	0.0404945890174	14.2451408808	9.08912195147	2.16294201165	0.0624361045709	0.0535205145018	0.199839810088	0.784546990693	0.0203874059052	0.130705321038
EGR1	76.3536285526	111.543389401	18.5962409506	62.1241623313	29.7407459928	52.0320807086	33.9411132202	17.7023713392	17.6393756699	93.9085687581	37.009169448	28.5789921444	5.88922077474	18.580958199	5.35667199698	213.683802825	24.7108687655	22.1349244526	2.99215197722	15.0865069503	70.1564141446	9.34522653781	17.7766067178	64.1932846948	24.7161236627	93.565301024	30.8417725264	19.7640090161	336.361101916	3.847322751	23.2099840784	26.8410310277	44.1437075082	22.3860486962	10.982994207	17.4942465164	3.28450837158	29.9091416135	1.90601327221	342.951199386	13.0120949921	13.1094487391	13.5140204558	9.13281433545	17.6027499018	281.596395015	7.44883677547	34.4866636122	12.9076294555
PSORS1C2	0.0	0.0	0.110152276039	0.744406628366	0.0863518240935	0.148376383143	0.016248240013	0.0	0.0	0.0	0.0163514831223	0.0	0.0	0.0	0.319894711528	0.0	0.170435235796	0.0	0.0	0.0	0.0	0.178210336242	0.0160832060548	0.14265454996	0.116280653753	0.0623927737288	0.0	0.0	0.0	0.0	0.0205226774601	0.171639448496	0.209955975906	0.0	0.136456453229	0.0	0.0	0.0283673773657	0.0421127945657	0.0886127245759	0.0618033890871	0.0153526591317	0.0	0.0136626484481	0.219594089256	0.0148237842914	0.0	0.401516663168	0.102149049812
MRPL49	19.1282007292	30.1156569703	39.6750854856	27.1355730306	8.96965554618	13.8685349893	12.4852953372	25.5849116047	12.6974534301	24.9413691891	18.2181004813	19.3392838069	14.2205854302	8.03649791388	26.3138167305	16.5452920527	12.2420780062	30.3983004602	18.6934934492	20.6426462594	13.3395100636	29.374197217	13.967846713	14.9612304345	19.2707138169	18.9862425901	13.7488838232	10.2058336029	25.7376994336	22.3876105938	19.2256842238	15.7468844677	30.4947421499	25.0867707517	16.2593069747	6.68810898872	13.8687330784	18.0694667707	14.3166410292	27.1911118299	20.5087423243	17.6154317333	7.76346752336	13.8653702124	23.2308682086	14.9219677977	17.6735766652	37.1349802761	10.2901901575
FRRS1	0.0502232733492	0.468613787141	0.109165044334	0.229517536418	0.0718854378441	0.578383178	0.212554535847	0.628509311234	0.379302670183	0.375178251302	0.938265687435	3.66670189733	0.183305139698	0.100318739936	0.8779228023	1.16352101305	0.924769780576	0.175365662902	1.22948717843	0.950957019476	0.426960614703	2.56249609178	2.54387421518	1.17342095775	2.889193744	0.811565777723	0.34724686421	1.13334693783	0.406835570119	0.0441474558326	0.927446747679	1.42884959709	0.343322530405	1.48064544137	0.121710125036	0.0403963717048	1.0424693476	3.12055818746	1.18319750502	1.7300252286	0.234279263829	0.319516303025	0.0140019745438	2.1813258917	2.40259096622	1.33540528344	0.0820321157054	0.212222986392	0.498069048461
FFAR1	0.0	0.0150833649158	0.00913566403038	0.0	0.0	0.0	0.0	0.0150279657282	0.00507881515628	0.0607692303026	0.0	0.0	0.0	0.0	0.0	0.0149801926521	0.010601499414	0.0	0.00879416615108	0.0	0.0	0.0	0.0	0.00788752980692	0.140525856517	0.11642961346	0.0	0.0	0.0309515751784	0.00738911117095	0.0	0.0	0.0	0.00708059166373	0.00848793386053	0.0225375978298	0.0	0.0141161765342	0.0	0.0	0.0	0.0076397914329	0.0	0.00679880818488	0.0072849618533	0.00737661269368	0.0	0.00740010197034	0.0
GLI1	0.474694862222	0.219725949688	0.713125066493	1.01438749024	0.0897615298022	0.220980261923	0.484471190682	1.31351355349	1.59138221715	1.25457076952	1.31504197042	2.24028521704	1.05001140318	0.150596167413	0.895262682577	0.247044899279	0.582779855987	0.152129772159	0.449588147404	0.0997355572158	0.00958137231483	5.47321230966	1.91380205255	28.2613307468	0.308996436167	4.09619542083	0.732172711426	0.221047054105	2.38203440371	0.0446809217594	439.2697511	0.0737813994655	0.151787868268	0.116769129412	3.21483321587	5.04861758998	0.0313741030524	0.186236825712	4.53308571857	0.0686797797914	0.756554926474	0.0293979319719	0.0450900883383	9.02956766129	0.296344069072	2.76958643475	0.259972167513	0.284756064639	0.100593973887
PECR	2.27552953371	18.266857924	0.351654160098	0.278998689776	1.99108527145	1.78747999806	2.95373803756	1.24969908779	2.36439594927	3.19733831558	0.886433324513	1.38387037875	0.776288216765	0.526294231665	1.77865357181	0.620143255022	0.677563083853	1.6322910563	1.09217076485	1.48539360706	3.8102787092	1.62187596737	2.10416049045	2.66375167928	2.11324452902	2.19291383781	1.32495328232	0.609481692427	2.53453957393	2.29149991708	0.541445246001	0.310159279965	2.88343059305	1.19304631731	0.117126551817	1.31765973635	2.33901445842	3.9060862328	2.61021241616	2.57803990497	1.12797983068	0.160908605293	1.06378923506	3.89097800868	1.49731607686	0.482168973651	0.166195382123	1.5371049016	3.14536891909
CXCL14	23.132795781	439.956571102	6.34979069726	16.9929222418	15.6675000738	0.700770597179	0.51089402775	0.369277065699	0.154514272142	0.979705975383	458.070448189	0.119568876361	3.85635092459	0.124087798344	0.100298049768	24.6804400548	41.978845799	0.107941529478	0.133773738571	11.4447848812	0.632244438257	11.2824164082	0.112378857497	761.370807936	8.0572189702	127.599935422	0.443938754753	0.15343122985	0.552313228414	1.78111625251	324.27285159	2.39860697645	0.01746469239	0.00828518852398	26.1508428832	4.81286122365	5.54300178546	374.803434823	0.882769465834	0.335382337319	22.6626769211	5.33689525411	5.8547253741	1.73429162832	1.39798971253	5.67957345483	1.32096858186	0.277089792866	13.6683186804
LILRB4	0.859573545641	0.578390315051	0.397027469869	0.265554525442	13.6936144058	1.82760979026	3.58177661285	7.14020971335	1.00344401516	20.9625792446	1.58088454081	0.713433038173	11.714182194	12.0800376985	0.152045648409	5.12614001741	1.88164217143	1.09336389347	0.552403712346	20.0644935801	20.7383897995	1.98146606331	0.558261095123	2.88054383435	2.14337984896	16.0160021849	1.79827317558	1.63453075879	0.113035856886	1.322274905	0.0783221650855	1.80470184976	0.114467148685	1.33946936148	0.771853377492	0.259269633442	10.4901611226	17.0432888759	0.202810906193	0.426749807435	16.5751112772	1.36713391604	23.463755737	1.46741767031	2.39443618184	2.26292282324	1.37612647873	4.34297226534	2.70288193749
RASGEF1A	0.136676349891	0.619895748823	0.0590997583997	0.0156625431806	0.189681102158	0.127997264123	0.113842024132	0.674805894641	0.189402255716	0.262082523838	0.0897944940111	0.0251608744486	1.06581681658	0.282482103098	0.0698955499608	0.216619555133	0.0847194744046	0.0319124172146	2.42956180635	0.884984923394	0.431122311666	0.0920356361295	0.130959087668	0.0480239259247	0.292541128624	2.78535499219	0.353253815014	0.153018576561	0.0471128537706	0.0506129172549	0.0272036149438	0.0278589587312	0.0425976874736	0.0323331085161	0.0290697408801	2.8816654972	0.065155637691	1.10120355903	2.74724788195	0.0419498737289	1.02110942739	0.0930310976529	0.352265055599	0.0284591639829	0.0693049022023	0.0701768151453	4.11015164155	0.473089871526	1.76023350284
HRCT1	9.96414363873	3.28395814808	6.02262400485	31.5226459869	3.95127767721	11.4553509372	13.2568535095	0.658035071961	2.76749449375	0.969102196787	3.82022282	11.6977600403	4.91140757868	8.94302939647	9.5022975647	8.745909529	1.47000390874	10.2410171675	0.55621712353	10.652731006	14.0132310362	18.6310806071	1.55753153373	7.79010635981	0.583151850026	3.26659008772	42.9062083717	6.69848448213	4.96938942701	5.71604528558	3.67679968811	10.4183854715	2.86834592648	12.6772105668	56.9472279877	1.17875195218	0.793363784857	2.09470686548	0.280382553293	54.7960878858	1.66462549291	3.32667882343	2.93602245587	1.52158758506	28.6558728896	2.35074010894	21.4873484719	7.77674379188	2.69565966187
SP3	3.18592074975	5.11434503467	16.8777868083	7.69402801914	3.97069953464	10.3740714528	4.35191439698	8.88032455343	4.09440280071	10.3211556833	6.98482076126	13.9429999509	4.30554729288	3.66137158944	8.92784226568	6.03184370641	6.80709956495	8.01542221447	7.69339353842	6.52378153965	8.37286981462	11.7593031186	14.167240042	6.62607106356	9.47309906365	9.32926142215	6.37862816989	16.3912973761	7.37743980025	15.7728647704	11.4080701752	9.45725847633	7.61296367232	7.97677733495	11.0521090228	1.49382541998	5.94809748127	8.03066566352	11.9694327099	17.3538081401	5.11441232352	5.71694357558	2.43121317599	15.3509504942	11.8150810804	6.32268191165	5.54656178849	7.94529466598	4.62905825785
TRIM22	2.46716559235	3.60736210757	6.50560196182	6.81262132312	9.7490061869	7.4608563938	3.36462724256	9.04874132384	1.43887220394	18.3310327127	19.7163032705	5.90025203528	24.0115392339	16.0430802434	7.45065276562	13.7499281559	6.95525105215	10.6882000723	3.3388308102	11.5554381701	28.7681467716	18.9622310432	3.87119029458	16.4900550193	6.80037629669	22.4641191575	3.55744093678	17.4399739814	0.0504981118784	26.9645678767	25.6161878244	11.8271962166	7.56892787845	5.04759971775	8.50444444284	0.246578916057	2.9171274714	38.1390435523	0.337881723841	5.62563230136	12.14867782	1.83594340679	4.50730538294	8.05177093548	8.64989142613	16.8179772662	1.52852267158	39.2826275442	2.53675796459
ABCD4	3.38142236792	7.87467409861	4.50227068124	2.20377852953	5.26363063228	3.02690002484	3.04925489535	2.61987107422	1.99835246282	3.56606141868	4.15155000839	2.80863298607	4.43141805378	4.3016171836	2.21378578317	8.1169035295	4.15738361692	2.93280936972	2.45669027867	4.57066348486	5.02525003962	3.18060527642	1.83079670246	4.6583567546	2.28306605906	5.20811387275	5.0546218195	5.25951197819	5.78538114389	9.61012934721	5.4528208706	8.21916483242	1.06007536016	3.82350254181	2.58588791371	3.34696692525	2.60858265787	4.6167753002	3.2087653882	2.24672852443	6.60162954421	4.04694624049	5.88906538832	2.00678426287	3.32333579487	3.50122942583	5.12209025229	4.00578853144	2.47562048876
PF4V1	0.101496144888	0.86810255204	0.0	0.0	0.532668340194	0.0363203151585	0.0	0.0	0.0	0.0298930802957	0.14409352943	0.0	0.0438156149026	0.0	0.0	0.0663203548256	0.0	0.0	0.0778671186787	0.0	0.0	0.0	0.0708647010077	2.33961964121	0.0	0.0343638361054	0.964907234745	0.116102175844	0.0	0.0	0.316489566195	0.0540189835167	0.0	1.25388868466	0.0	0.449003349869	0.0	0.0	0.0	0.0650732013169	0.408470675001	0.0	0.207508189791	0.0	0.193512032678	0.0	0.0	0.458664557755	0.135024606073
DGKA	1.37098786724	0.511859857862	3.00101599821	4.2026633347	2.76283569931	2.82114447962	2.89199584724	3.50526160457	1.95561579913	2.57549298322	2.67474407472	2.0670050781	1.91437563262	2.00529141732	1.61784169782	1.98259880109	1.63813455649	1.70562794577	2.00547278697	2.39934468625	2.13525876731	2.94194155843	1.64949298319	2.50000411343	1.78783232972	3.19774417778	0.942331333707	1.01256100261	0.948819552339	1.91073300558	1.20142546462	1.50720103084	2.52744360759	0.616725425739	1.27506299175	0.956027690616	1.00345179641	3.611946096	3.9611381144	5.37372776479	2.1899666395	1.96691385273	1.69132886675	1.01978329018	3.78902811473	1.31505759421	1.86027976824	2.67364778645	0.988990800427
NT5C1B	0.0177179124258	0.148628080624	0.0847254359637	0.0675953774979	0.019925677995	0.019021022837	0.00468660045521	0.00435535851491	0.00588770595744	0.0234826003226	0.0188655185259	0.0383250540573	0.0516292347159	0.0	0.134855577683	0.0173660522794	0.0245799499831	0.102078914086	0.00509739603088	0.0669224520087	0.0050514282934	0.126169846098	0.0417509863725	0.00914375790509	0.0383310765176	0.0269946161731	0.0187156992276	0.050669121136	0.0224257243031	0.0342638292773	0.0236780326853	0.0070724628532	0.121118320688	0.106707908379	0.0737984016241	0.0130635536957	0.0236297841615	0.0245466395565	0.0303672647044	0.0255592257994	0.0356528203914	0.0221414070748	0.0067920287855	0.236449145452	0.194240068918	0.0812389482736	0.0530558019478	0.12010178036	0.0353563302583
GLIPR2	57.8368555648	2.7269983177	50.8635496125	43.8697683314	28.0003209379	46.4950442584	77.6655235475	37.0885152056	68.1368937109	17.7596600256	29.8897618161	76.1759186815	61.4280578671	108.117079274	25.0100233991	21.3494665507	30.7794599113	46.0435426685	23.9422655949	24.2988820187	49.7468990491	65.1874371881	50.4438833963	10.775749584	64.7259389315	12.6886580714	160.37695249	16.6507621954	24.5961732551	8.22230541163	12.461060738	66.1058681153	19.8206393761	7.46656850567	41.3950477522	1.66226772079	9.93619970977	34.7154485722	22.3918070942	36.4477237135	44.5171531165	45.3958782656	27.0975469634	5.88880273125	37.1373977659	24.4075670586	11.5518284696	42.7065068413	8.77478728054
GNE	3.57591840321	5.69292926394	8.39952166372	8.79923982704	2.61814568358	7.61552856089	5.92940611903	4.53698181576	8.66195495003	10.2052585556	6.12158089614	8.12363728744	4.4348730217	3.08746845342	9.39318090183	4.86072378919	5.3142372454	6.78332076647	7.17271748146	2.96474195163	4.18098059462	8.99748187071	8.50659767388	4.19675198557	7.70826786077	11.1027126338	9.32232754469	7.56875108287	9.55005426985	13.3660440701	10.0445709939	6.82165965845	4.77369321572	7.86642874433	5.61571746537	0.52303110684	3.68453525152	5.6644115859	11.4995148316	10.447225046	6.4786641048	8.4393373832	2.64518952725	6.1476928917	7.64469691409	6.14725581008	7.98834677183	4.60560755684	4.71858857081
TIGD5	2.70638811277	1.80432024367	2.48728199065	3.89709887986	2.6567204062	4.61844814939	2.72482080663	5.14823254351	3.62348868251	3.3379645019	4.25972820523	1.80403766855	4.0651460924	2.28098620658	2.82458766979	1.8947442374	2.73182544574	3.50573296847	6.35339346718	5.74939068479	3.09386956096	1.78360623252	2.42262615879	3.08761378542	5.6530026278	2.01676827512	3.90402541286	3.789238991	7.49131195527	4.78388056275	1.90034662715	3.49988893984	2.13419999097	5.13059146492	3.90492672685	5.14562837131	7.6243510855	4.08537600744	3.91301304979	3.34640446891	5.20527291623	1.80813877863	2.09001940768	4.92932640158	2.41132507658	1.45803882042	2.84530194277	2.11946059675	2.47583522586
RORC	0.0375813193216	10.7157764887	0.00345596981081	0.025950407796	0.0487663763501	0.0248278991818	0.0214107598796	0.0483224496288	0.0115277215513	0.137931927873	0.0246249213824	0.0136432378928	0.0112318305676	0.0167153245028	0.0602191714286	0.062336139697	1.21517756411	0.0793108977509	0.0465749634395	0.159107296309	0.131871302051	0.0243982067208	0.0605522572042	0.0208866540656	0.7974019997	0.0528535937218	0.0549660693552	0.138889294659	0.0	0.0559051756951	0.0115899880893	0.00923159580806	0.0	0.00803564282282	0.0577968690015	0.255775357267	0.00308436567202	0.192242498435	0.0	0.0667242646995	0.0581714662385	0.0173405382237	0.203907622085	0.0437231588082	0.088187510063	0.0027905306818	0.0346265317344	0.041991248126	0.057687710239
CBR4	2.53327227226	9.78538316861	2.14843643417	2.8262578974	2.91112108348	2.2743624983	3.01673536445	1.90299335879	2.69885355102	4.38199797595	3.05062356843	2.12036208167	2.04547753375	1.88640974587	4.45796370912	3.76678849741	3.46165304015	2.76483749517	6.24812769842	1.67088730276	3.15698155171	3.76267616176	2.84493345458	1.94765801087	8.81889772252	4.06499299289	3.14321836195	12.5915195364	2.14867228012	2.51298031485	1.29320981255	2.6873545745	3.33115083103	2.07822847756	2.94810028111	2.10987640647	3.6504825815	3.05795886925	2.18928842982	3.36690781131	2.53139908727	2.3563777998	2.19394226416	1.67574655867	3.58784941526	3.85316858807	1.21428222102	4.65860603319	0.620690410303
AC136428.1	0.0	0.0	0.0	0.0	0.0	0.0	0.0	0.0	0.0	0.0447111401558	0.0	0.0	0.131070206184	0.0	0.0	0.0	0.0	0.0	0.0	0.0	0.0	0.0	0.0	0.0	0.0	0.0	0.0	0.0	0.0	0.0	0.0	0.0	0.0	0.0	0.0	0.0	0.0	0.654319162733	0.0	0.0	0.0509125339901	0.0	0.0	0.0	0.0	0.0	0.0	0.637023677636	0.0
KRI1	6.15855867474	5.62852711618	16.3031994368	11.104974976	7.00042723	11.4990441244	9.36682287226	7.20312197941	14.8756651033	10.4808067876	7.99410099402	17.0554067872	10.8596595931	8.7683476285	13.8142774915	12.4700607362	10.4040585995	10.1557532081	15.7175883098	15.3468962523	5.72530445437	11.1253792798	9.96521779423	15.9340856718	8.64503779026	9.55960526004	17.4832055184	27.3223492577	31.3096925921	10.1609006306	11.8752089953	12.6153759167	10.0560118896	19.5691706468	14.4669184163	5.23651340587	12.2716197575	17.974094168	19.3117314147	18.2896566612	20.4460297914	19.3685650351	8.44697416918	22.2222160515	10.6529122278	6.03668825262	13.8725379616	13.7310062687	7.1358305057
CTNND2	0.108077200472	0.111739536507	0.06152562895	0.0277192553506	0.0057878244329	0.190614179131	0.0136131983207	0.075906226427	0.0017102057156	0.0409260356198	0.00547987923377	1.47351210183	0.439905453773	0.0	0.0123699744984	0.040354626512	0.0928167993279	0.00282389785435	0.0118451510856	0.0166620063795	0.00586916643036	0.0108588550821	0.0134749285757	0.0	0.0473197223388	0.00261371447575	0.00815454168952	0.0147178920275	0.0442952984858	0.00497631820372	0.0206333199001	0.0410868561791	0.00502590229787	0.0	2.59235945542	0.0683024183685	0.219640272655	0.204395572014	0.0105849585642	0.712723648053	0.0181231707035	0.149209145284	0.00394576989185	0.247253524297	0.0441555942261	0.047195058541	0.0	0.00498372013797	0.0787364816411
CPEB1	1.69831528621	0.468870483676	0.948328633339	3.43500004117	0.280446338018	3.51027998343	4.09874957747	0.452351829748	0.348613829042	3.835040219	3.10389565197	0.794742826841	2.01850510772	0.658799467017	3.42405210682	0.0210707396342	2.09361481829	2.72481736767	0.0222653514031	1.59381978698	0.943873058213	1.89826104299	3.39744268134	0.190823493488	8.51798000006	1.19222223446	0.931040537319	0.481990091904	0.894657823722	0.0769106182464	0.307402977658	0.868420094597	1.21134064701	0.974026530341	1.12464452056	1.04295580307	1.9060287278	2.14041617287	2.14293377338	0.436232047441	0.253062872845	3.45803929693	0.428530303081	1.44592897879	2.26455012313	2.28888973639	0.0214580525833	0.788985990585	0.58056471524
PRSS33	0.041809491502	0.0	0.0	0.0	0.0	0.0	0.0088472897798	0.0	0.0	0.0	0.00890350643497	0.0065772206666	0.0	0.0	0.0	0.0	0.0	0.0	0.0	0.0	0.0	0.0	0.0	0.0690457628174	0.00904509955468	0.0	0.0	0.0	0.00846698511331	0.0080853389754	0.134097040222	0.0400538485735	0.0	0.0	0.0	2.1085299356	0.0	0.0	0.0	0.0	0.00841310339136	0.0	0.0	0.0	0.0079713763461	0.0	0.0	0.00809736536622	0.0
BLOC1S6	6.70947328194	7.9366155245	13.8911204832	10.0420059144	8.67967666986	13.9160338467	10.7252218465	6.42640885199	11.1943937822	16.110430652	11.0086864204	12.7756428582	6.09398532401	7.39321551021	9.57542014751	10.2607480501	8.34771744027	11.0558245811	10.8955897307	10.8918037948	10.5401143599	11.9220317626	11.3683853955	11.2306602419	9.90216921113	12.6134246215	10.6775323879	12.2539267708	15.4697933341	10.3079098777	12.2405479135	10.1871777779	11.3017993238	10.9056287288	10.3174910582	6.99989103778	14.1622190603	8.37112477694	15.8470099751	4.92668710428	6.10628280721	12.015732075	5.8119047326	8.51568889911	12.0087965517	13.3035412341	7.09044996186	7.49389054985	6.37021988409
FAM155A	0.17031012528	0.352553033465	0.0471760404457	0.0316950217669	0.294305052597	0.610939907855	0.77572304284	0.067392552648	0.0289874136598	0.192689607316	0.0729788056559	0.081683464941	0.169460227177	0.0	0.0599048347518	0.407141305645	0.126779121064	0.1253584151	0.0430224301485	0.65000375234	0.0639516881519	0.0766891475068	0.0522046909458	0.111473624833	0.0179731861785	0.189863932757	0.0636235826117	0.204322352033	3.70558205921	0.516122854337	0.113800334264	0.106119381473	0.417823715093	0.0153952697494	0.115345261388	0.0122508264341	0.308019780637	0.15346340807	0.00284780158477	0.0499356272601	0.814971774831	1.80023154031	0.187899483394	1.27130276986	0.324712417058	3.8312936079	0.0165850078298	0.623486657952	0.0580242162284
SPATC1	0.0439968341067	0.0347360800402	0.031558325223	0.0315956235627	0.385937151031	0.0566792362115	0.121031982159	0.147086120968	0.0175443076624	0.318770156696	0.0749544816768	0.0276852816101	0.433047601997	0.793710568633	0.0422995191741	0.172492402685	0.0976584559867	0.038625632236	0.0911359550455	0.123448558974	0.421465806399	0.464152481493	0.267252078688	0.145316044913	0.0761464883287	0.303881097758	0.009294904437	0.120787913883	0.00890995144958	0.204200130536	0.0352781451108	0.0421493413987	0.0429655798085	0.0489185271595	0.0	0.415221832265	0.0281650073099	0.617665366657	0.0482608009473	0.00846243425198	0.2567442733	0.0	0.580185454417	0.0939434721391	0.0838841397258	0.144397101593	0.0351326162375	0.0852099434651	0.163886367909
DNAJC1	24.6227780715	19.6239824467	8.04487451188	9.50805924986	20.0991552817	18.9971077605	19.0142088996	20.503117521	18.7343743183	7.18753477703	11.3005681738	12.5358617505	24.3898280133	25.5591012734	9.44787920969	22.2304980814	8.69894356232	14.5449945618	26.507262389	10.5008769825	13.0938474726	10.6750653779	47.8476987808	16.0634511675	22.2425688747	16.9696619391	16.4097245306	23.4246932951	16.3307119254	8.79415908032	13.5510394073	9.6623783895	10.9091479684	10.9917055268	42.1880823274	14.9005917762	24.8243401394	26.831047392	23.2660140229	30.1313379838	12.2979724596	14.2388086721	30.6529256024	20.6499377313	11.8946066659	33.0109257984	7.92228555841	13.7373794593	24.0673127117
VCX	0.0	0.0165202162656	0.04002373379	0.0	0.0	0.0179708099647	0.0	0.0	0.0667515174947	0.295813988898	0.0178238915551	0.0	0.0	0.0	0.0	0.0	0.0696684316939	0.0	0.0192638085072	0.0	0.0	0.0	0.0	0.0	0.0	0.034005540184	0.0	0.0	0.0508500641497	0.0	0.0447413821405	0.133639381022	0.0	0.0	0.0	0.0740536330589	0.0357201704082	0.0	0.183619767775	0.0	0.286316648496	0.0167351260677	0.0770042239842	0.0	0.0159578643061	0.0	0.0334176117481	0.0	0.823970060565
FAM111B	0.324587981864	0.157910687447	5.38880256282	5.5771080773	0.74549141432	9.44279303197	1.04480010852	5.44813747128	7.99997267105	0.844233827104	0.267727493525	10.7158810103	4.99708978162	1.08378737067	5.72853529694	3.42338701363	1.73777319439	6.90831631161	7.01293887157	2.80229384228	1.88210098439	26.6564800714	8.90550808988	2.22719503317	8.11999402694	1.99671412173	3.55905812895	8.17902710991	6.36040447748	4.57517581494	4.93038333338	1.85406911377	6.63425478396	4.54511115462	16.5232233248	0.101121644935	1.83399911954	1.09783145642	12.637108843	30.1827296292	4.09369458521	4.33733485461	0.378542638742	2.505467295	7.48730765628	0.185345270845	5.91395705294	4.08172613836	1.65426988253
ANPEP	2.52704772319	351.621509368	0.853862934945	0.257112548899	19.1433006051	1.19492420148	3.58288536193	69.213276854	0.508424743444	0.65030797508	47.3290003165	0.4420281169	75.3438957527	13.9282460916	0.145239059369	16.993341716	18.1323619072	0.831555305615	0.621674066577	10.5367886459	80.1673834657	3.66807766419	3.49333442947	11.2152658401	0.458854502229	8.01701029916	5.00169665486	9.78776380388	2.30549520986	4.8904432566	64.824232601	13.2277197637	0.254924990542	221.436291228	1.02286311815	0.310089769854	146.460801895	6.08113640839	0.183935476162	0.631107186083	144.037359614	477.395994418	91.4298294918	20.7053215862	2.93438293362	7.54549184399	26.3747351584	2.15920877168	22.1726979791
DDX19B	3.03842019587	3.09494670779	3.01607422489	3.87738459965	5.08601168268	2.64556790083	4.648642308	3.51366766366	2.99787678222	3.66467217272	3.87977085716	1.46222000504	4.11205960771	5.38796565429	1.14520195354	3.03167031993	2.58979016799	4.24723292252	2.89434249801	3.50235779409	3.7011006341	1.7345610207	2.2904875496	3.1925343777	5.42849990788	4.86727793952	1.60888999336	3.31484292767	2.73256310006	3.10785983169	4.73900482172	3.82872984719	4.87795771722	1.72244708788	2.83259546529	7.3196879579	2.85010939518	4.39343050377	2.91842038855	1.83662707007	3.11203708428	4.8023742463	3.5990648119	3.76644351069	2.17052715822	3.52859827759	4.42059134975	3.40746875802	2.76403311255
AL359736.1	0.0	0.0125779370894	0.0	0.0	0.0	0.0	0.0	0.0	0.00282346447586	0.0	0.00452350387074	0.0	0.0	0.0	0.0	0.0	0.041255822954	0.0	0.0	0.00458469047319	0.0	0.0268911435273	0.0	0.00438491252918	0.0	0.00431511244817	0.00448758075657	0.00485970137044	0.0	0.00410782677798	0.011354861236	0.00678323536101	0.0	0.0	0.0141560850265	0.0	0.0	0.00784760259094	0.0	0.0	0.0	0.0	0.0	0.0151186391294	0.0	0.00410087850255	0.0	0.0	0.0
HAUS5	2.09488043048	1.31875271202	8.31188455355	6.67548443547	2.24633848607	5.1703525213	3.30631674116	1.86479287634	4.76192611232	3.4467575669	3.52740960046	5.16502205327	2.52828616735	2.56341144339	5.08534404624	4.60452749218	3.23449135913	6.82419594311	10.5400931843	5.12609499024	2.63110336426	6.18955702535	12.4859553764	4.99970232241	9.1394466266	3.25533528546	4.00666242237	6.00679485768	14.1084964192	7.26455041237	5.12945620182	7.45091556644	4.09495416765	4.18834646069	6.60166909932	1.67798966179	1.38486924711	6.80090404745	7.84418220749	9.07603827282	3.13705478401	4.41823815997	1.76085521052	6.43342482686	4.47178662942	1.20591120093	5.85624714727	5.02434261267	6.800610731
FGD5	3.17385483946	8.29634748366	2.40618698105	1.20582894892	5.40337470499	3.33895013604	3.102634347	11.0197293464	1.26911675227	3.41911301181	4.70455702884	1.39497896578	1.0091314439	7.19340894548	0.844097787546	14.5171844257	3.20029436591	1.80411730299	1.71002812194	1.47569995266	1.50687383205	2.22989443508	0.999953247441	38.0669216371	0.334769859133	11.6910844286	26.1112580208	10.4247806033	1.66465599639	10.2147555884	20.7675416207	12.4588078426	0.870250036847	1.15921588129	2.2307094039	2.63788072934	1.52921707661	11.2390660659	0.46347103639	1.72669628819	2.80020202482	0.31159448623	2.87760937689	7.77010065884	4.56982777841	8.4346890447	0.696698643138	1.67488054871	1.50087753775
ACSS3	0.271678373981	5.70967484305	1.214992211	1.840161726	0.579120582393	2.39691222705	0.734300924438	8.33088536405	0.911001148663	2.41029655988	1.17287961589	0.634283043232	0.348649864587	1.44234748006	0.0277027687983	1.37983066742	0.662997357624	1.24405407136	3.46751247181	0.0426455398578	0.112663699634	2.54302981226	2.6732805365	3.31906327693	1.94358640148	0.748824536808	2.57367071069	4.82266080203	4.33521005266	7.52615306474	2.1850100483	3.92968557623	4.09060440736	1.1853943248	0.0534933914352	0.662845865494	1.13046433997	1.95721217025	0.868626080486	2.21371741371	0.314343333594	1.64197553611	0.234801589204	0.219733525142	2.03778278338	2.69877664367	0.125727893162	1.31541844758	1.69541280073
UPRT	2.55684058303	5.07132628236	3.55736613003	3.72056921532	3.16368629865	4.53678663738	3.82969579209	3.90324146667	7.23755789775	7.6778128145	2.27647373876	4.351722015	3.30324757504	2.50856844839	4.02688427881	4.27685295626	3.32160175249	3.43016123441	3.99272264644	5.37687467708	16.3401707032	2.51931780245	4.30802195457	5.23291115124	7.025938768	4.60353761915	11.192923923	3.80437034108	2.55732322618	3.63890053857	4.36097815196	4.85103857215	3.48590623461	5.34050054611	5.43682359779	1.35511595079	3.02145225498	5.68150871274	4.02866645359	3.96195594807	1.91836625861	3.44986478471	2.55940234018	4.80538318513	2.84267463508	2.35343973617	7.5253504346	3.51113227575	6.52849944902
PPIAL4D	0.0	0.0	0.0	0.0	0.0401230697808	0.038301423258	0.0	0.0	0.0237113976286	0.0315236119482	0.0	0.0	0.0	0.0	0.0	0.0	0.0	0.0	0.0	0.0385021379739	0.0	0.0	0.0	0.0	0.0	0.0	0.0	0.0	0.0	0.0	0.0476789476345	0.0	0.0696823585258	0.0	0.0396275053569	0.0	0.0761308682438	0.0	0.0	0.0	0.0	0.0	0.0	0.0	0.0	0.0	0.0	0.0	0.0
DLX6	0.0256021009139	0.0202131958947	3.68504980681	7.60250339773	0.0	3.83141941008	0.0541765033776	0.518578104695	2.94024080539	0.864134500332	0.0163562240568	1.7036622471	0.0	0.0947418195536	7.20382028748	0.090337207008	0.0639317443639	5.05160610785	0.0530327230433	0.0110516429673	0.0	0.76166493639	0.0	0.0264251687211	0.0	0.0884153904319	0.048678996476	0.146432144077	5.95211623604	0.490155800432	2.09392003427	0.0163513536652	0.0200016047958	0.00474434541457	3.69676713499	0.143462363455	0.202136394881	0.0378341362372	2.71706280393	0.329931885019	0.00515177569224	0.0	0.00785149862794	1.41677188096	2.67494336618	0.17299429334	0.0102219717003	1.61149074728	5.42228125239
GNB3	1.4746914412	0.0760641322091	3.18807031103	3.67153647995	0.231142502665	0.777785230228	1.21779069751	0.0959940278092	0.478091316748	0.399525323382	0.470515473028	0.695160747231	0.878403005309	0.897247688422	0.502240639504	0.322320397733	2.18839685764	0.439823117836	1.96906164845	0.421428696705	0.281269171102	1.15461744816	0.801820586991	1.84030964218	0.522463056267	0.172229106998	0.23881711406	0.928682286387	3.57957623532	4.02933585334	1.22915133988	0.533274399395	0.481714529698	0.480851900152	0.662034145358	0.295503513937	0.844261868814	0.379662309811	1.19770895223	2.22863881298	0.553164607737	1.42292393552	0.252125167463	1.49943293413	0.729850590516	0.223197799558	1.04628140827	1.19417880618	1.1142181779
TET1	0.0513381663094	0.0975774186402	0.140931978209	0.0716871633451	0.0406284960474	0.338848831731	0.780573287445	0.416920070087	0.180707502276	0.042000936462	0.074909087732	0.191436210823	0.0591001317291	0.514527490713	0.307723536937	0.123001123194	0.147717877709	0.0938973399923	0.7964780085	0.219559187961	0.264544082892	0.754229792021	0.448054432244	0.282605912927	0.137803377195	0.204717891837	0.331401171279	1.09839558478	0.510206958249	8.62636723925	1.94642835644	0.315738864896	0.122551822407	0.128608640767	0.200633445242	1.1579916282	0.178523935223	0.06322186816	2.40636443754	0.330977939644	0.0784353411783	0.110252192515	0.0	2.6102160356	0.210263074266	0.372589625627	1.19188762315	0.106793159765	0.505906146784
NHLRC3	2.08319689235	5.77606974758	3.00760342819	1.85765036606	5.78566652894	2.46123547427	3.5423394224	3.4003498316	2.68659495381	4.38251493928	5.28125605605	4.65348265451	2.94417140861	3.15152642523	2.56977004004	4.67783570598	2.85942404883	1.82343389258	2.41317599923	3.76472691591	5.8575508106	3.26748862575	8.94049589818	3.76848304471	4.5485348566	4.7440752922	2.20633388819	11.6217752671	3.26451223192	7.13263903063	4.44476555601	3.20740770003	2.25502723827	2.33359464254	3.53197376892	2.909379172	5.89761805587	5.10028537033	3.41176716467	2.90179366053	3.22710316087	3.56196543858	3.16050935221	4.32209964051	2.09098069699	5.10968373651	5.44593924018	2.30014197742	2.7457039805
CA13	0.102230559829	1.74351338144	0.122214295654	0.172066976729	0.549696217411	0.98431470607	0.513782987386	0.219887302447	0.488339837195	2.43886005029	0.238114036061	0.379441859122	0.450980618076	0.0849717836438	0.122858371899	0.306863609937	0.155119804649	0.466279786468	0.886020193923	0.913624809827	0.302392131382	0.556101356762	0.491835380529	0.280279833144	0.5771061493	0.9150676791	0.145108456552	0.361790173859	0.423765865642	0.0339794853612	0.243354107726	0.11732125834	0.302622869448	0.068081528347	0.865812246203	0.763175737222	0.419249992133	0.808480518083	0.534408925251	1.13063510132	0.144642066989	0.0958152568819	0.122466618885	0.0454762538792	1.12074552066	0.626015275475	0.0510211004259	0.519731329555	0.0467505600621
ZNF652	4.69271630892	2.88436225398	2.36048033832	2.57860365581	3.51003992351	2.42316280151	3.54196877922	4.84086085855	2.71246546629	4.54841709014	3.12265071273	3.83305787813	1.72641480149	3.74842688799	3.33092148985	4.11422574396	3.45948706484	2.61778536431	5.32650864978	1.85393694218	2.70667568822	2.73439128548	4.65016420239	3.67251355916	3.38480972248	3.55093493163	9.28296982191	4.79706252267	5.5778076042	5.46982267368	6.46417750487	5.18508663122	2.74454369996	1.7867700268	2.23987614558	1.34792742308	3.42627793466	3.43998724275	3.19383242782	4.32795879065	2.53115043416	1.23248219874	2.06863995808	4.22673647505	2.73649297153	2.70126030663	2.74121141545	3.00297733892	2.84011461423
TTC17	2.04712075569	4.82675363352	3.42769725806	4.73879122701	3.0150438829	3.53342849081	6.22628410281	5.49690863462	5.49203375063	4.44451080794	5.14932606125	8.26522319934	4.25044858235	3.19807323687	5.30908072663	5.11434317973	4.33810086504	3.50544299883	4.15327643129	4.5991185965	4.13902547331	5.63852714227	4.5796658432	5.98179593798	6.13355863967	5.62110012165	6.75999437571	12.8883910067	7.2628903881	11.1818776306	10.5393333463	8.25146196603	4.88474321318	8.89508677349	3.95302276275	3.03256321342	3.50998790761	5.49875616022	5.431389822	5.13406451698	5.3680192398	4.02898456697	2.62302746483	10.852506585	5.16077246808	6.51286194543	5.83010572632	4.59519313198	4.66595930028
MYO18B	0.782396616576	0.116718919268	4.44393957244	0.19436630853	0.00613875526731	0.085947352005	0.0327274976565	0.0125235628264	0.0241853324256	0.0192922166673	0.0154990361349	0.00143118586935	0.0	0.0	0.0	0.0	9.63746638432	0.0	0.0041877844581	0.467333286081	4.30772023507	7.04472139174	0.0247727107479	0.0112681319084	0.0747912126375	0.00184812718391	13.2098643662	0.0790920653907	0.0644837770014	0.00175934843561	0.328265575487	0.0203364275469	0.0159919074404	0.0354036878253	0.343566307004	0.0187817185294	0.00582394082743	0.00672212733784	0.0474018422245	0.0227481322963	0.0567507423489	0.00181903544214	0.0	0.0	0.388539304845	0.00878186273187	0.0871763784734	0.0229055495049	0.0145235615846
ATP1B1	7.88215908717	642.813076421	6.15128439991	14.3223857637	13.5982258036	77.8274705166	50.4545702793	11.2853706003	164.240734102	8.52909528473	2.38068099139	28.4715758544	8.7409932844	16.0238179614	49.3263090158	11.3020900698	36.2289957252	8.4797476782	51.4875685636	19.7792060112	36.6899664729	28.1667720995	79.8087019157	2.47389895891	120.127325906	7.95760637928	50.724628222	6.35653533164	40.9082643018	15.7156715419	8.03966535814	5.64529381217	24.815694625	10.6675997987	9.76807304143	2.32111387346	15.9924943229	9.39465861812	96.2299393245	278.855847671	10.8878396246	6.85479125647	8.11846018426	12.2800087207	19.4046444706	27.5681349659	2.48764898798	29.7459915215	22.8676615258
SLITRK5	0.0075317709754	0.0165178677536	0.00200090220103	0.00375612569838	0.000941141995996	0.00269523828547	0.0239069256695	0.000822859991421	0.00166855070267	0.092428730005	0.0534640731384	0.0	0.00108381514378	0.0	0.0536385884992	0.00984292997744	0.084751208626	0.000918372315519	0.0	0.0	0.00381747516576	0.0	0.00175289645671	0.450886531884	0.000905238603965	1.83008799832	0.0	0.69882473467	1.27276564394	0.0137561489159	0.0335512662831	0.0173706497723	0.00735523165504	0.0	0.000929517848253	0.00370215528016	0.0589299025145	0.00463760848749	0.0	0.276053082571	0.006735904606	0.913607986427	0.0	2.50761360797	0.0119666968035	0.382905028538	0.0267302888835	0.000810388838243	0.00111331476362
TIPRL	12.4993448045	11.5614835249	20.9879425954	15.5183180728	12.1879431721	23.2220815522	26.1422575923	24.3592753541	28.6903861222	8.80037430202	12.2928114187	31.7942029978	16.7773527369	10.997859177	17.5678441853	29.9316531086	13.6196014319	21.6555026975	33.2873226711	21.4497562946	16.1370543736	22.4845898259	29.6964911797	12.4483077525	19.5600671135	17.1802959089	22.2236315573	12.1147933139	13.1173688774	16.5300084939	17.8327408073	21.7088873888	23.812864002	10.7428275981	41.369454191	8.087637979	18.6843946956	17.7600044722	39.2777010744	36.8850466047	18.7672612755	29.0110426663	13.8006157136	14.8971663257	17.6354967395	14.3420113019	16.8832624124	17.2397233948	10.1419413741
CLDND2	1.58881854488	0.603073638761	0.401795355219	0.781684199817	0.601325418644	1.80407655398	0.339442038334	0.240343451889	0.588887738682	0.229473351682	0.17893275216	0.889222027286	1.26625610957	0.989338991991	0.611989150681	1.1978970664	0.31790741971	1.4585603415	0.650486821004	0.758385537772	1.11501977056	0.193402220835	0.59198998065	0.283828256841	1.30549893642	0.403448082719	6.58407289591	1.20581550449	0.727047413744	0.384067589807	0.796230176544	0.878135586718	0.253623290223	0.198170815474	0.542992806967	5.586906734	0.228195033274	2.0318502127	0.335153728378	0.381995453405	1.13742828964	0.183275688596	1.24154878434	0.203876025717	0.553417629786	0.309683728925	0.152489534577	0.650927308609	0.569065640819
FGF17	0.0107455608217	0.0530235112875	0.128460721474	0.144689115813	0.0120845266453	0.21918155506	0.0852698935881	0.0264143815013	0.0428493160675	0.218373180426	0.0171623415796	0.185947052664	0.0556659591826	0.0124263970049	0.0	0.126385975853	0.0149072498605	0.0412725515123	0.272049282296	0.0231926477603	0.0	0.0226724436959	0.258838332917	0.155274194933	0.906634329321	0.0327433935754	0.283767465851	0.350319860062	0.832366200661	0.519508242046	0.567230072178	2.59932051929	0.0524684628389	0.0348471954196	0.107417424013	0.768510144923	0.0458591783154	0.0595481910019	0.095769132759	0.00516705370968	0.345963601826	0.263195114716	0.0	0.0382404519994	0.107559015425	0.0259314754109	0.0965318599174	0.0572309072674	0.0500334560987
TRIM36	0.0346677491453	0.0855332643229	0.145055753659	0.13485382208	0.181942007905	0.449711214518	0.165060642043	0.252816699085	0.422406543719	0.615182281591	0.156881152482	0.345402533498	0.194557672324	0.0534540382203	0.0416629159083	0.181222837724	0.128251608811	0.0380443205779	0.152931887266	0.183944861693	0.612800310269	0.32306470544	0.226922382173	0.494987978032	0.125000819627	0.909660716274	0.149531946188	0.436223584949	1.4801946532	0.0474883053448	1.27792526995	0.0830299965848	0.0366764254142	0.602278856592	0.632140714032	0.00852026641334	0.320564133584	0.0320194509771	2.26977146893	1.533653895	0.188933556939	0.317701845274	0.062018233723	0.164497125107	0.231340738559	0.0892385509444	0.144182808745	0.137081653365	0.718702868051
AL354761.1	0.0	0.0	0.0	0.0	0.0	0.0	0.0	0.0	0.0	0.0	0.0	0.0	0.0	0.0	0.0	0.0	0.0	0.0	0.0	0.0	0.0	0.0	0.0	0.0	0.0	0.0	0.0	0.0	0.0	0.169071642733	0.0	0.13959361087	0.0	0.0	0.0	0.0	0.0	0.0	0.0	0.0	0.0	0.0	0.0	0.0	0.0	0.0	0.0	0.0	0.0
SELENOT	12.2106121433	24.0715931373	16.6347252171	13.9745016994	18.0597478781	10.9216022127	15.7572563154	11.095003541	16.7868093736	38.5444196753	9.93189480291	26.5526422584	16.909055077	11.6214775145	17.7728871866	15.053293094	9.39119788534	16.9947690915	12.8034445768	25.2808203771	38.7555828121	13.5441422745	6.23083239165	18.5631077889	19.0200922172	27.0738993935	17.2427872768	8.43247154976	9.78659801734	14.1648099618	13.17893388	9.5197778758	15.4737808119	34.0759184524	20.0520447995	12.5644927723	13.0506903618	13.4907974824	17.2344192948	16.3063842826	18.5720305187	9.38925563366	15.763270562	7.27655805193	16.0619666978	7.72181140857	10.8452474635	19.814736739	7.86930588089
ZHX1	4.41966701943	5.88200327317	5.05497798439	4.14847584517	3.335196695	7.03974023073	6.11484350822	6.49409540124	7.98668885278	6.55556448205	5.80500694766	6.23151703082	5.72387537484	3.12052618037	10.5032699266	4.46799079373	4.63033422275	6.44863697012	11.6464882566	4.44727966196	6.19050176875	10.6352763946	13.427962023	3.48283174934	5.44390205436	6.580697554	5.92771671937	9.80270253531	23.1639228583	22.2008799241	2.32474655222	6.77653363315	8.23558956289	3.54403517414	7.83344251421	2.58451683453	4.97544192328	7.59787862835	15.1158756462	11.6830288394	3.70077703679	3.62225733808	1.85192055362	13.5024300295	7.60733951694	5.41691556816	3.86498648737	6.83710251981	5.40915662672
TRIM43B	0.0	0.0	0.0	0.0	0.0	0.0	0.0	0.0	0.0	0.0	0.0	0.0	0.0	0.0	0.0	0.0	0.0	0.0	0.0	0.0	0.0	0.0138934232715	0.0	0.0135929018522	0.0142455259206	0.0	0.0	0.0	0.0133350280084	0.0	0.0879980577148	0.0	0.0	0.0	0.0	0.0	0.0	0.0	0.469490140759	0.0	0.0	0.0	0.0	0.0117166634715	0.0	0.0	0.0	0.0	0.0
DHCR24	5.73441277892	24.4454693324	13.015247361	21.9966482379	4.95354699153	64.2382458784	7.26315444157	17.1605224649	45.2004235926	17.9136077257	6.68102363339	54.2112045962	34.3829687072	8.86589070966	34.7171163763	6.25589763957	13.1147407544	11.7878499691	21.8583262269	45.0634005476	32.6979547717	39.1734908954	87.8436332585	23.5292363462	8.93133135661	32.2587155912	10.5520741612	3.0278901097	41.3396065636	13.2511590709	27.7326562167	9.28208829285	20.026094996	85.9128237718	29.6957336202	10.2146677377	24.8719546553	11.1607274572	137.375156264	42.887863693	19.202494764	69.9243181836	9.77422164465	75.6248487415	22.9834924195	2.03364880732	89.3915610186	28.2720216709	8.76198496677
KCNV1	0.0	0.0399571930883	0.00302514967391	0.00227154379175	0.0	0.00271660761036	0.0	0.0	0.0117724592038	0.00223587733405	0.00538879655844	0.0	0.00327722467103	0.0	0.0	0.0	0.056168654869	0.0	0.034944808096	0.0	0.0	0.0	0.0	0.0	0.0	0.0	0.0	0.0144732616399	0.0717443232069	0.0	0.0	0.00404039395267	0.0	0.0	0.0	0.011194523983	0.102595044538	0.0	0.00693934858155	0.00243360159675	0.109477632553	0.00252981200766	0.0	0.00225133195519	0.0	0.0	0.0	0.0245044213404	0.00336642519797
CCND1	25.1705396034	24.1405508057	7.30851609277	2.95727677318	201.91523668	4.65540715364	69.7126869128	46.0293413561	2.04367210679	103.019947042	104.968735225	2.90476210111	93.759972958	16.5411861209	13.2703575387	35.4936652763	6.44711859216	4.6866086994	2.112278597	103.772468873	35.9977236194	9.97514998966	2.0486941046	20.375447493	1.63346632653	156.364461447	3.76187298173	22.3976240966	46.6679183458	149.623888241	191.779534513	56.8920552922	15.0861224184	119.753222938	3.56167587744	112.822549807	68.132989531	7.58489637659	1.35863896754	6.90968269015	99.4997776571	151.570954975	47.3924861375	138.815761244	4.57661966974	34.8994235889	3.43066724334	14.8886910813	5.08313128824
ESF1	2.46563675855	4.41140115746	6.01995660745	3.87454597026	3.37808550659	2.61160684053	6.79207756886	2.11660673022	7.14958359373	14.4445483274	5.75352559117	4.47054670384	3.96130761672	2.35598652679	5.93069247286	4.57499089492	3.39770803948	4.99575892344	5.5863846673	7.23585189077	5.94306664517	8.88104681926	11.4332791301	4.85742094089	6.70633381311	7.50202291395	9.08380952709	11.1938959763	9.54166035814	8.99475859509	7.15517789245	10.4163919036	8.17272662076	13.0763512595	7.05088654084	1.19036149284	3.26929526083	6.37031092459	15.5785257696	3.1211462613	3.01666262498	9.68420532168	0.665206990875	6.23889377438	6.89964264274	8.1102140736	5.71149172432	10.4332739901	4.7193115115
CPPED1	4.95437057893	12.1469578124	3.87800907046	5.49137443852	6.43243846964	1.37427916733	4.12094859675	4.9250298704	1.77758687126	2.15869163467	2.6448851787	7.06123269552	2.57501206274	2.08511453765	7.57649364227	4.53296147608	1.77969319612	3.70033139826	0.937179530316	7.49526891695	13.9433467359	3.15498558091	4.91487795146	3.56465255932	6.12223227008	6.44592216249	4.00774805285	1.45500163553	0.0882530416252	2.30966361789	7.5309427228	1.52209566448	2.21830413867	4.92865855105	7.37551970077	0.95188156189	7.63692175075	3.04892431927	6.72966873678	5.68930864296	4.58461715122	0.4955755022	3.26594976502	0.705151959152	2.19921470944	1.12001417711	0.641603714763	5.02446266499	2.22478235879
PCDHB8	0.109571385612	0.120856837607	2.88178186889	0.595937855704	0.0942306401604	4.35923315439	4.58271528541	0.171113134588	0.192763278167	0.535326154727	0.116668428847	0.34474238075	0.0667788349756	0.0894428473468	0.444098637986	0.606468179018	0.572264295373	0.0212194280742	0.0815899626739	0.438207727268	0.27196410599	0.523574163048	0.303761282239	0.279408546759	0.0139439782916	1.01473648879	0.285950611173	0.346526859144	0.0130527536929	5.43448091927	3.43679947174	0.0720384546606	0.0629430063326	5.08813384281	0.25056442712	0.028513351415	0.0618910616836	1.000105348	0.106050468067	1.25211289045	0.0972726698679	0.59925799056	0.0	0.716790406718	0.3686616097	0.516397887085	0.257340002878	0.056173255796	1.12326674118
SDC2	46.3233238417	26.8540740766	72.5905765607	54.4024291826	29.7081876299	51.201555397	31.1342212788	20.7949011938	108.35638252	15.7933921329	71.5231391216	53.6166676715	10.644238606	45.1948634364	51.3937479413	42.5413495085	75.4554475496	100.58501657	93.251591053	71.7721104123	18.7769507579	70.6798137319	46.6551257123	71.1240768103	13.127167341	15.1459971279	90.7163124245	24.0274681504	16.3605447798	35.5943145032	199.396859248	131.416182678	41.3745916679	2.69113371072	102.290070723	35.480767356	72.0588486393	39.5339052879	32.5373793331	44.7592587455	21.670017675	33.726942258	25.5395645257	67.1849291652	48.7844858254	47.5266341647	33.7088739352	44.9521168201	67.4372893663
QDPR	10.3456390798	57.209174095	4.73461537362	5.86134709469	43.1888972835	10.3008165741	19.2902037447	9.32102819323	12.0747908882	13.7780031241	6.54059324893	3.35584032212	8.6881250859	17.8190288008	6.46635058872	4.22130467691	9.31467007663	9.05981944864	19.3865452277	8.56046390983	10.0601465046	4.09286896633	7.87230612156	3.93283220441	28.9639995762	11.9801162338	9.24510878682	3.6124134987	11.4577490083	8.84235295555	25.5993397792	9.88171260942	5.92544926631	8.81015637807	5.52109991683	9.11774765843	16.4894010253	17.0097619918	4.7258154804	3.45900547687	8.27143102068	27.3577459715	12.1721970597	4.69460927877	8.53059745231	3.16537950282	6.7883415666	9.82267860187	10.4299556123
TTBK1	0.0823819168819	0.506395380371	0.078788557654	0.0507096493326	0.00794119134007	0.00252688318176	0.0149424038504	0.00694314850018	0.337894526782	0.729984000792	0.00501244984424	0.0481365242229	0.0426768644153	0.0680487254349	0.22252489955	0.0276843064526	0.0359190612558	0.0154981295277	0.29524745559	0.030481500675	0.0107370622982	0.151472200058	0.364835621821	0.00728831722663	0.415011301119	0.0525968670978	0.00745896569575	0.0107699739288	0.157301078091	0.104692370004	0.0912210173656	0.0150328718623	0.402254718599	0.00218089395373	0.0705879793543	0.0555344673701	0.00753394237919	0.0956543579037	0.0258188531257	0.106391171605	0.104200036246	0.00941253258773	0.0288735905827	0.0188469160919	0.163800469084	0.0136324285766	1.04784678501	0.344175261052	0.00313131833355
CDH12	0.0	0.0586829230983	0.00710859244923	0.0	0.0234051240388	0.019150711629	0.0	0.0935478216779	0.00987974901191	0.0131348383118	0.0443196764763	0.00467713469625	0.0077009262556	0.0	0.0	0.0349689143626	0.115488522572	0.0130507818009	0.0	0.0	0.00339057989996	0.0	0.00622750402795	0.0	0.0192962123833	0.00603970452762	0.0157027552231	0.612175108997	2.20066350856	0.0344974462951	0.206608773083	0.0284827367634	0.0	0.52340353428	0.0	0.00876841558666	0.00317211951016	0.0109840013369	0.0	0.0200149391929	0.00299132565026	0.0	0.0	0.0	0.00283426714528	0.0057398491364	0.0	0.0287906324132	0.0395526623849
TRNT1	1.81788093359	2.95639419317	3.41289732878	2.34722473145	1.96161673616	2.75214259056	4.13464411276	2.81965815539	2.52057141428	2.60164060914	1.66300332154	3.40354362898	2.4247869378	1.75803228558	2.85137701161	4.14702933486	2.24221328354	2.59904025391	3.22639118271	5.02540817728	4.88719096178	3.36628984511	3.97198061819	1.64838938212	3.33043253889	3.99198419082	3.62414354401	2.20762459114	2.27822356093	2.71400125016	1.88192729156	1.77833861358	3.13797920806	3.47845036676	5.53844298773	1.17515519732	2.66006192907	3.14519055316	1.33405518124	2.32692710965	3.59362402838	2.0285653811	0.942248134	2.19535832665	3.02966618613	2.32632403174	3.83351725926	2.72113738741	2.28215564711
DUSP11	3.214140051	6.31450771944	6.20746201928	2.97469363474	7.19566046594	4.47231799454	11.2988078725	10.0053473484	5.96792595111	7.24731752456	6.20793468992	5.01709798569	5.0338503848	4.05113340426	5.39777193831	6.50575733517	5.57888052273	7.30593370818	4.10595250288	6.51776880814	9.09825378494	3.7482958445	9.33656432755	5.04049654518	11.2064495738	6.84819669042	5.91650041831	8.3053023182	6.51411226695	5.03517678676	5.02122280633	5.5695644969	7.10975356576	4.38169348781	7.13446047701	2.57188713384	7.24134735628	5.53219889004	4.32505767553	4.26040345044	6.79353351051	6.4614161196	3.00292572679	8.71167320274	6.77887283999	7.9753130667	9.7788474965	5.61690290649	3.8184836679
RBBP9	4.55573372017	11.5515077083	4.33624139403	2.00781349805	4.33637792631	3.23597922142	9.14189696768	2.52309269045	9.23832530683	7.87686149834	6.21936558904	4.89660024738	4.2177380723	3.05204508328	8.62657117105	3.51482421286	2.49379062477	5.77748071265	5.12162351458	7.94723617153	8.25214984883	6.61569839741	12.6609947276	3.44638679362	4.47276307552	8.49275375115	9.2863678581	6.62928088119	3.07532478098	4.61735050411	3.06245548268	11.1666934644	6.82529768125	9.22207360805	8.67232713388	3.743438962	2.05455740581	3.83595123611	16.8143049165	3.36954800479	3.19381538659	5.03007350468	2.60207530765	4.67983749613	8.09728321352	3.77063935576	5.67047796551	5.24875375533	13.0341235121
PLA2G2C	0.187420109874	0.0211386636267	0.0	0.0048068842094	0.108397984156	0.0	0.0113313984323	0.0263262801682	0.0	0.0615083210694	0.0114033993879	0.0042119739381	0.0416102200955	0.0	0.0257413993276	0.0104970361489	0.0148575288937	0.0	0.012324631883	0.0173364690392	0.042747214142	0.0225968230529	0.0224326100218	0.0331620643732	0.0	0.0489512741126	0.0622206201503	0.0	0.00542215662805	0.0	0.0	0.00855000284891	0.0104586923803	0.0198462672345	0.00594773048868	0.0	0.00571327771084	0.00989159610993	0.00734228528663	0.00514981975249	0.00538765141375	0.519281117689	0.0738988383596	0.0	0.00510477466433	0.0	0.010689987991	0.00518545653531	0.0
TRIP10	25.7853224584	10.5352057714	38.3227753597	32.1122897672	19.9606730299	23.0490982034	14.9174104097	15.9213805551	19.6041512521	14.8165330247	22.5962139004	13.8701592241	31.091106994	25.207930887	23.5938262298	29.4724192597	13.9358733187	40.9071708287	18.0776474806	30.6219628289	24.520074397	15.5103044231	12.3041373091	25.1265541727	23.4209110414	10.5005769021	13.9653885043	45.334779895	18.1696822639	17.5136482876	11.5456810764	52.309883653	29.4730390049	19.5890507397	46.3592551965	5.98408030576	14.8202825556	41.8390320536	13.8283738158	19.9057811583	16.9742030324	28.394322813	14.396779591	7.89153476407	23.8454254632	20.2967090719	17.2736407206	46.1555194293	16.3079341904
ENTPD6	6.09011165	12.3477374651	7.93849759849	3.85986034297	10.6854506112	2.23865959048	10.3932918026	7.34101032973	13.3367598036	21.1112037355	8.91320050994	3.90890632284	20.5145909852	13.6829198857	7.88338528965	7.14220546567	7.12879687926	7.00707181091	8.47726910846	7.35223151877	12.1475433299	5.5959693958	10.6002125583	13.7933914132	11.2209630302	14.1799495822	7.26654062334	7.5695044264	10.8596117382	9.33470977803	14.1243176467	16.0389835684	11.9173903753	26.8963006691	7.61867988527	3.93052829192	6.572021854	10.0494642755	18.8236760504	12.2430946664	13.5823592274	9.48236370229	10.2178403836	3.40668533905	8.25501189297	4.75866572695	24.6530949819	6.34047877146	4.313386008
MAGEB5	0.0	0.0	0.0	0.0	0.0	0.0	0.0	0.0	0.0	0.0	0.0	0.0	0.0	0.0	0.0	0.0	0.0	0.0	0.0	0.0	0.0	0.0	0.0	0.0	0.0	0.0	0.0	0.0	0.0	0.0	0.0	0.0	0.0	0.0	0.0	0.0	0.0	0.0	0.0	0.0	0.0	0.0	0.0	0.0	0.0	0.0	0.0	0.0	0.0
GNG5	48.3435630545	67.7561368134	95.9556420216	76.6566014993	114.378892755	73.0577260225	54.6281317667	101.331187621	209.421430731	72.3096945348	68.7571042551	64.6335430824	113.597734405	104.115790948	34.3295974494	64.4129289371	51.2915032906	102.165439867	96.0240221595	78.5651360016	84.4903849693	50.9003802918	75.878888422	61.257500118	184.418517568	60.2339949795	90.9089549445	46.9073672097	85.7448536747	32.0025860153	63.4385120211	61.4673852295	69.4042870636	121.14983391	134.874994109	23.3489817531	129.660042663	57.1773572469	105.286720317	77.2990630906	136.778903366	113.951384691	138.150909955	46.1611990573	58.7275955071	63.207043191	100.28183524	51.0895985978	94.3996848456
AREL1	1.62635489308	6.31043778214	4.25543805868	1.90028998514	3.59822899192	3.03015200751	2.57986388876	2.12426711449	2.65804183392	6.38430786316	3.83391712234	3.73318293021	5.26413316187	1.98415110414	2.95452417404	4.95507793911	4.18391917102	1.79006259	1.67970498864	4.94980071809	6.27791757142	3.3397257246	4.17848647728	5.32275939696	3.13943672162	10.3017871525	7.7881798233	4.2764301436	5.11900851041	5.69207863868	4.65368841721	7.96008307107	1.27908319437	5.86640777468	3.74704416417	2.879323069	3.13781999132	3.43723490111	3.83368765801	2.24967353124	7.60776632189	5.01787000123	2.47898176733	4.14730927542	3.08006652012	1.53958022402	7.1784761394	4.11862051862	3.90606896139
PSMG1	7.8084636509	7.81698535376	5.21307143363	12.8526756684	10.0607600381	12.476136568	6.56034804023	10.757209079	12.6098438228	7.25920471563	10.108662409	8.72680806188	15.9056431263	6.22833993132	5.58091278347	8.54812678369	7.48153082778	24.0347919798	14.1495545823	17.2474269122	3.92390531087	9.91188304269	19.9959335397	7.18251636236	23.9721104648	4.17957159203	7.72897728814	5.55046879144	29.642621988	3.44240620654	3.78180312878	2.99357527183	11.6438805496	10.5986997648	18.0557252788	12.8295342856	27.5031464364	16.9014300651	13.1713416324	9.69748531244	12.2012545623	10.5722744931	12.6623725133	13.3505533573	12.1965671363	5.10403817381	14.5087577368	10.362979219	9.21087933052
PTPRN	0.0470315025578	0.0126586332116	0.0741148853228	0.0345425341008	0.0384668578458	0.034425380425	20.4542742529	0.187080072813	0.0142078947175	0.0510002510214	0.0113813131526	0.131159063519	0.00276864192945	0.0	0.0239787735495	0.0712415965044	0.192773784586	0.0234601270723	0.00492030455759	0.0161493654617	0.0316935697706	3.17321515728	0.120901476335	0.0397174028457	0.0161872354214	0.11725551533	0.205494911229	0.129608312025	0.311711324118	0.059945629048	0.02285542097	0.00341337724195	0.0229645589017	0.0118846972533	0.00474896868458	0.0409815428884	0.483547591908	0.00789795036207	0.0381059362521	0.0082237528356	0.00430177323872	0.859161641034	0.0	0.0513527701625	0.0509488767794	0.328111482591	0.162173109186	1.06406497105	0.179171980604
SLC15A4	2.70239025946	3.12678758478	6.39982853177	8.80343409428	5.8794971059	4.01537737497	6.10949788916	6.69505853555	11.6688033002	8.12576161043	7.96167874991	4.43069156731	8.33969959283	3.03220366042	7.76969666961	5.42972564388	8.03295440184	7.43338907097	10.5980038786	8.45428768709	9.77319850138	6.27476895994	13.1280339961	5.48898738904	16.2426289051	6.77894194369	1.22532918978	7.70431731061	2.2157619383	6.62729461589	2.64524467117	4.93052964507	9.04368230071	9.89059454993	5.20370576622	1.56366887127	8.56752771761	7.03971360791	12.4510890702	6.34122717899	4.4712154373	7.74197503338	3.46873952193	3.77649424852	9.12538101259	6.1135972824	5.0484246307	6.75539501522	7.34837514992
NUDT12	2.1870249696	10.9983032721	1.78553836548	2.87669013005	0.885988975829	2.18929475902	2.15768624057	1.23861478171	4.16963054186	1.60972570492	1.91799401819	3.16938903973	1.1053262555	1.05815072386	4.82597808837	1.04565503682	2.37942082502	1.39139102953	2.23348731465	0.983039019969	2.91057336078	3.64916378992	3.67421290738	1.32560164338	3.33330412288	4.47614514594	2.31018759719	1.85871383001	1.79072013779	6.20124459498	1.82052933417	2.35856119481	2.09569207562	1.73365259868	3.08544875876	2.61995123806	1.21705027637	2.25871287714	1.75535207832	1.44822647178	0.615126087365	1.40292770365	2.05741188129	1.59164775368	1.50596782866	1.057537864	1.78571480622	3.06351326413	0.720549524228
OR10V1	0.0	0.0	0.0	0.0	0.0	0.0	0.0	0.033329778117	0.0	0.0	0.036092525126	0.0	0.0	0.0	0.0	0.0	0.0235125385275	0.0	0.0	0.0	0.0	0.0	0.0	0.0	0.0	0.0	0.0	0.0	0.0	0.0	0.0	0.0	0.0	0.0	0.0	0.0999700356713	0.0	0.0	0.0	0.0	0.0	0.0	0.0	0.0	0.0	0.0	0.0	0.0	0.022547295064
MIIP	9.09622770038	4.57807928632	12.2963026092	13.8749784044	23.3670301164	6.75434262152	10.3263584216	23.6681004481	11.0423163441	11.0905341256	11.0318894904	5.96809682312	23.6581954474	40.6356198722	2.39748756479	12.1737934836	10.0310440423	12.9500441995	16.1376222135	30.3410086183	9.55242101472	3.74470850913	9.74941032045	11.5403592171	15.1349749486	9.25192384277	26.8746560459	15.9623411884	14.6050180704	11.8764887867	9.2028312609	9.38597551314	1.86463914896	13.7762185113	21.4791333582	40.0464512018	20.425391097	19.5781160447	13.2447799215	7.72442659078	24.4135436474	17.6117476838	28.0685537316	16.5753449304	8.89819225199	8.25476169562	22.0581706473	5.32872660028	14.7578400359
HIST1H3D	0.429691708283	0.763306342782	0.359580625351	1.46573712082	0.773174483368	0.599682867799	0.363707562334	1.52100564078	0.171345136148	0.189831969761	0.183009300152	0.304184453603	0.556490291463	0.944118944217	0.275410008053	0.168463383061	0.298054320507	0.141462853828	1.23621155567	0.834681385273	0.686035582678	0.0453310963678	0.855031757414	0.798310133597	0.418319348748	0.69831328261	6.98990382866	0.737291189668	0.565619326693	0.0415480192605	0.976200351204	1.16633688498	0.9651260971	0.477759046274	1.33634361131	0.0	2.38395200559	0.238120320953	0.530252340335	2.31413603515	2.07515029052	3.35068983969	0.329438184523	2.10258519304	0.122887203233	2.36423129027	4.6321200518	0.915416020379	1.94356586259
NPIPB7	0.0118287536574	0.0	0.0282820088067	0.0743280166498	0.0266053845164	0.0	0.0250307783187	0.0	0.0157228959493	0.0313546977516	0.0377847399679	0.046520730234	0.0306386483311	0.0	0.0379080754554	0.0	0.0492298696832	0.0259617025779	0.0408372095951	0.0127652768232	0.013489648095	0.0124789555306	0.0123882699015	0.0366270891838	0.0127952111584	0.0120146834876	0.012494891631	0.0	0.0	0.0228750648574	0.047423467674	0.0188867444044	0.0346544884162	0.0	0.013138389251	0.0	0.02524097775	0.0437005813403	0.0	0.0	0.0119011884545	0.035476673814	0.0	0.0210476164973	0.0789342450776	0.0114181861588	0.0	0.0801818148521	0.0
CD82	11.5789726298	8.40487396477	7.18679748703	32.7972334179	6.28063612536	15.8398682004	13.5508878845	56.0565678439	12.8865363266	44.4492259583	11.4615668511	47.4058290114	16.7560681816	2.61455960159	14.3236981569	21.8867968022	27.684952746	33.4400529763	22.428841791	50.6786527978	144.969571199	12.3579121245	3.80954578543	21.3620164416	20.9928416147	44.0970239534	55.0857146369	1.17602855177	1.39388212352	0.850863259754	1.74068146143	13.2155964114	27.4478707102	111.402473222	29.6121274613	31.1491366857	68.8021454235	49.3441222761	3.43451966041	15.4968442048	45.836878363	38.0461161077	26.8861052147	4.65082754275	24.0573070699	6.33703980419	40.7865495928	25.3993458977	22.9842921206
HLA-A	359.260623263	247.232107799	459.769909665	333.07313263	768.295121142	210.901911159	453.650261596	568.982813352	165.225174733	594.795943678	315.098811837	174.899588016	1322.113803	1742.70399764	211.172732441	913.781475697	192.908631025	912.066455362	346.193847855	483.883433074	1081.7210526	224.645457535	139.557124362	106.012099886	778.418677639	804.717706117	317.958890532	251.515870797	191.135759023	48.9476754966	83.2743609426	255.019395343	324.849320207	231.35578778	324.207755815	133.545525491	406.015261124	1899.0619285	128.722962415	120.154712725	1099.31124927	275.368070128	1522.52533814	101.513730047	243.115236219	236.310266714	326.875170844	819.837267866	148.5601502
ADGRL4	7.92136115988	9.32469485066	8.14092050494	4.35544595827	24.2025041648	14.6534707972	9.13347339091	5.45019833843	3.82031154421	24.6649695556	12.987537516	3.58797364151	6.27724835492	3.02259511632	2.79212805726	66.2938041193	11.6005411946	11.8029834911	5.27242300744	4.91188814631	6.72096186589	7.7493040121	3.59740324826	14.0056990502	1.61947032254	15.5831568976	9.12909303996	15.5852111035	0.704745076763	3.13249918846	5.0186587211	20.6347615964	3.62824404068	10.127861903	9.2043785302	6.26134980435	8.94305661368	11.3027148886	2.9110006564	5.37886189179	13.0983933492	46.6743472655	11.7240950548	3.98703740152	15.0932801581	17.3905223313	2.94879393715	6.1627952695	4.46304751232
HERC6	1.28954242293	3.78482061549	4.89819200893	3.49189726574	1.97477812116	4.55570735055	1.02249195524	3.79190233293	0.988732126905	7.91118589755	2.04174785371	3.932571669	2.29388698755	11.1262393674	2.7404436806	2.03783114098	3.01122844532	19.3268831692	2.86624387807	0.983688750358	2.80215362545	7.60294744611	4.55288272212	2.18686631482	6.26882077391	3.35039393884	1.99011076139	13.1888704736	0.52476891681	0.170968700696	1.66629403476	1.65984586638	2.20901376342	4.14659884129	4.37144124992	0.094404640107	1.49294958738	14.4162884455	0.856904135929	2.39823896682	5.97496772971	0.5546886857	3.60409809597	1.94196870915	2.34238749447	0.873996810758	1.66144889481	4.80900474356	0.511009746856
MED17	1.69996856876	1.81196394128	3.49229647092	2.2352979822	1.29972600731	2.12417709523	2.27389390658	2.21311521115	2.40233897027	1.83953575153	2.07190123792	1.56021711296	2.26318449306	1.00853251741	2.95250879422	3.96869424909	2.66764841881	2.06702795968	2.01667380631	2.53158794422	2.70141691779	2.29494513744	5.55402834172	2.150551512	4.00577762333	2.52426347626	2.95762772062	4.32989016804	2.07157487738	4.97244519342	3.89517484476	3.24041695274	3.47553133658	3.5436235062	2.48358851452	0.783223888492	2.4906305768	1.89866308823	1.47676236583	3.25713933476	1.92974241197	1.96172866683	0.806889615191	2.41667685419	2.80826860455	2.02232579347	2.16318004647	2.76375639772	1.535317381
ST6GALNAC4	10.9588050462	10.3446390715	15.7741828758	11.0127837384	14.5218814746	14.0932489819	12.3906730685	20.1709155851	5.97121511916	11.8841020504	15.9514002558	9.57059131815	15.2101492253	21.6807648172	5.20776239943	14.6506455014	6.94944813638	10.7144933676	6.42927777769	11.2467233753	11.5326643256	8.86216039526	8.93137735476	13.0784751221	9.18118187376	8.94849971503	10.4268682933	13.1887657228	11.660873551	6.84348009716	11.2980070573	10.6358654451	11.1412950441	7.13014503641	10.9041936699	28.2107268209	10.7752678308	16.7081695469	8.67315405952	7.51691971593	11.5799106682	12.9026549349	33.1341660816	8.68045719554	6.3373351234	11.6997985714	5.93848749607	10.0333930849	14.9541548131
LRRC32	25.2726083633	15.9747971946	7.84558083303	2.65936799365	83.2964916676	10.591473075	10.6145572428	22.1081075001	3.45875854666	10.8798879179	327.00509305	2.71965050724	42.5735665232	35.9448317407	2.57027208402	42.5073465068	22.9286323958	4.42893895109	1.46761793855	7.65932641138	1.59891809608	3.54738448878	3.66678342124	7.06803155698	2.53196252598	17.2781737856	17.1947810883	13.3334457077	3.35267545629	2.92199327292	41.4911098679	162.003597869	5.56185239093	7.51190116494	7.42129238862	3.30564744774	14.1434130888	24.004119737	1.36850054554	2.95193581439	32.1298965654	130.038985397	93.8532225246	10.5745344677	10.1262472825	61.3001213114	50.9422974838	10.0485053626	7.24481655145
ALG14	0.766325922346	1.34429765629	0.486554484114	0.431175467676	1.06180562274	0.383789565035	0.647871793729	1.71430898925	1.03932128908	0.803454500729	0.550481259895	0.806095643803	1.2916259247	0.97735940861	0.684472350286	1.2758045212	1.28184707084	0.923451535062	0.66668415656	1.41460284256	0.765208795361	0.53187451126	0.79873411986	1.1694128823	0.517590399431	1.09120964953	1.10577521022	1.04228007502	0.77781295571	0.485714589536	0.864858394573	1.03623584824	0.589023175424	1.02599412335	0.891896546915	0.756961943513	1.46897485806	0.778902866524	0.95270743857	1.23594497936	1.60290711316	2.65942226306	1.82724822994	0.696464602971	0.59945941733	0.578686191506	0.823471980558	0.479335785989	1.2243464436
SYT8	0.0375432168589	0.0222306481635	0.00897641138359	0.053922122866	0.0	0.0282131019535	0.00397225255419	0.0332234969368	0.014970844166	0.182446925019	0.0279824487956	0.0	0.0	0.0	0.0	0.0073595291707	0.0416667774586	0.00823997065238	0.00432043324301	0.00405156426383	0.886264717983	0.0712924002824	0.00786381248427	0.0	0.00812213021236	0.0419466723889	0.0	0.0	0.0114045105608	0.0689728916677	0.0501723619879	0.011988907056	0.0	0.0	0.713067642631	1.57227533568	0.00400561009574	0.0	0.00514771617247	0.0108316999641	0.0	0.0	0.00575676419383	0.0033401457728	0.057263764772	0.00724802378193	0.0374740437864	0.0181777589854	0.1548305113
PHF20L1	0.856789098829	1.25139172586	2.17580776323	1.54670069389	0.855416591988	1.98799300637	2.00561620927	1.13368070282	2.68965468711	2.3939923707	1.79074613544	1.63214061765	1.1218509911	0.863731545644	1.7195553405	1.35306290779	2.65831244981	1.1286632807	2.12016141046	2.14016186215	3.24359378635	2.43179482914	2.91942518929	1.5710654948	1.86751428087	2.31777734987	2.2852695774	1.94151554548	1.02576839337	3.39847891888	2.56306502663	2.28231583996	1.46968599911	6.19498178231	3.03612457552	0.511450415348	2.75798142822	2.11869323731	6.54487405701	2.38690628199	1.67915580967	1.95171546815	0.951762625497	7.62650218594	2.03702669254	1.792495369	2.17487392545	1.61115015781	1.42420732956
OR2A2	0.0	0.0	0.0	0.0	0.0	0.0	0.0	0.0	0.0	0.0	0.0	0.0	0.0	0.0	0.0	0.0	0.0	0.0	0.0	0.0181337376756	0.0	0.0	0.0	0.0	0.0	0.0	0.0	0.0	0.0	0.0	0.0	0.0	0.0	0.0	0.0	0.0991139649567	0.0	0.0	0.0	0.0	0.0	0.0	0.0	0.0	0.0	0.0	0.0	0.0	0.0
GRAMD2B	1.7377120605	6.67340203164	1.9561788083	3.0444488218	4.50615992765	3.28811386916	1.39835872771	4.25267776906	1.49183232081	6.09215176542	6.07944322502	1.86461276034	5.27983798093	1.64562915766	2.34185748186	1.84370849018	4.12780745179	3.28442522156	2.82055947348	18.1643040273	22.1337136422	3.43039100468	6.32756821859	8.11620570821	5.73362252888	4.71975825225	8.62016908743	9.08700078641	1.76309082054	2.28201529268	3.93896449489	0.842978483222	3.11397781953	1.70403248825	5.27380823124	0.917741157007	2.2531782803	2.93221297221	1.39028083426	3.44994897799	3.73943540831	3.21232583713	1.05617190601	0.544369035868	2.36984236891	13.7263077252	6.56112563267	3.47043685306	1.23262415086
SLC24A1	0.587122349356	1.30274926473	1.33405837028	0.699812280181	0.684331551793	2.23110850111	0.937976338927	0.500834585263	1.13831153114	1.20758961953	1.69535935477	0.594851830539	0.367599696494	0.589032284358	2.12767419613	0.826989417934	0.736296541696	0.573902526653	0.941888690834	0.568567734313	1.09302531821	1.56079396103	1.86707892394	1.41466285508	1.03886015282	1.92530541456	1.34099870133	1.23203273257	2.31304163994	3.63180182627	2.53054282508	1.28821360626	1.25683685961	1.67523337973	1.35175859588	0.708104578403	0.574564288818	0.951668675935	0.869005211509	0.772174767674	1.00148160212	0.550035547601	0.336858159485	1.73482847341	1.52157463211	1.19541646661	1.02460075122	1.30088399786	0.74227859732
CES3	0.0858860995036	9.66973282727	0.10267486723	0.668175411854	0.539283326963	0.122937091065	0.106016885191	0.830414629819	0.0190267749968	0.170744913349	0.301019704491	0.0872591269471	0.685920799375	1.41117916228	0.0344053231945	0.11224064914	0.605675369356	0.0589070242383	0.131782406323	0.374605907764	0.673375351561	0.0302023596468	0.0487221743707	0.114502638885	0.13935501709	0.141758657636	0.669080558723	0.208772180029	0.242778573754	0.920421226681	0.0860829632064	0.13713269007	0.045431203355	0.159156205081	0.162966610176	0.580474442181	0.0992709497769	0.356963350437	0.19627036981	0.0378571754774	0.640889247524	0.164570550773	0.384110904507	0.105065351287	0.0204687499611	0.0379981502099	0.0500079154529	0.0519806554816	0.199951331546
KIF2A	1.61288301964	2.09919903479	4.8292566768	2.77611961594	1.68073135626	6.95382637239	2.98638839535	3.01901884188	7.14210243087	4.86691156357	3.22594142831	7.68170878223	3.89979164161	1.22348472446	5.72013721952	5.1051392028	4.35191773011	3.00408548828	5.04038719786	3.36938064573	6.58959984797	9.63165206084	11.5801441836	2.80637616613	4.54572523979	4.89967550711	6.24434172218	6.50823952284	7.78744127583	6.73177125974	4.64704950447	4.67208762715	3.34162231986	10.6254852824	9.59003891161	1.15646107876	3.69032981723	8.19320449951	7.69965495113	9.54511000708	2.87332681355	6.12803929794	1.37270970712	8.12589879996	5.72352168541	3.52802340006	5.40575719493	3.63956049935	3.64176126475
MAP3K4	2.74695362619	3.05386805572	4.90061940662	5.13402840237	2.23111898598	5.1317389508	5.54701780661	3.871416345	50.911920168	4.13235074786	2.83238034223	6.91784409988	2.71529827498	2.709643434	4.8117024569	4.84172094262	5.07785184287	3.07633750378	7.00319598399	2.20432673736	4.66150194877	8.17369928258	6.57750101383	2.71409879684	23.7457311787	4.50475079799	7.65340849652	7.47159639147	4.95910935372	7.26228113473	4.48991546958	4.64841899105	2.91413902252	4.92289666562	4.03160609206	2.52389785152	3.4318099109	3.05320775263	7.10478451526	11.3009104289	3.68739543737	3.74611414123	2.88006580886	5.04657038661	5.14780081612	9.96053067731	2.9856161541	3.48307708337	4.28531695806
RPL28	89.2314051986	39.4605965138	73.1035835711	76.0208134516	193.404047455	89.0532951041	63.1851002011	120.519275818	60.7375504539	76.8123071025	155.182839012	73.7351802757	186.071739575	263.758201326	35.853592273	111.76222398	51.756520139	136.568581877	87.1238040587	126.147148665	74.8635640466	38.7804881353	68.5724993073	211.767029433	76.746405521	86.362312615	123.814220472	45.6514157331	217.360015988	146.511296298	90.635905161	71.8755884669	33.8335590915	119.310329731	100.409428259	895.430030578	100.354139146	101.420023006	54.9051709332	54.3819643682	139.410634851	120.072055354	252.127838087	37.6608648055	52.6848441231	89.414381331	98.7034206625	53.7765410184	154.422459498
CALCRL	1.9459705201	6.89323770008	9.62159095179	3.21500125924	5.34344075555	8.21133515761	3.45790791487	1.22378981685	3.22274711275	6.214753878	2.86164261512	3.26476790839	0.934376545535	0.325754033333	0.962623872142	11.9059933085	2.75147215991	1.47308787843	0.615256696513	1.62853891699	2.4847255552	7.31718709392	1.93265479008	5.67550776159	0.460169439844	6.64205298942	2.74782881683	1.37440485897	3.22486295503	2.18455752442	3.56090499777	4.18103767244	0.625967378408	3.44895919574	8.62972131429	0.339091071515	1.52113043386	1.78404209214	1.91543301455	8.73807904031	5.16511966333	0.669554852594	1.0930656013	4.45481504492	14.3420006797	4.33120383637	1.27388327597	2.94491056663	1.85078649496
CFP	1.16551997849	0.30469979301	0.276824994417	0.329118201846	1.49738139026	0.493038753718	0.204168225688	0.250454053831	0.230844135567	0.19778035381	0.583522114046	0.14267509446	8.15705804151	26.2693408105	0.129865809632	1.45255490429	0.364074394647	0.330347914336	0.248711933262	0.533106525792	0.0968271375277	0.447862514595	0.41227274262	0.832532563202	0.237955695977	0.407680055615	0.179373780818	0.370836844873	0.355613374759	0.548559152024	0.747848878162	0.671672229924	0.105528571806	0.253887797372	0.184325054965	0.0967476623624	0.238823997736	3.43619695669	0.0687922070321	0.282078675988	2.30260168203	0.254647471175	3.62760684105	0.144210209799	0.798364000202	0.555082045089	0.416040502905	1.06137773723	0.195101113495
PSKH2	0.0	0.304113126742	0.0	0.0	0.0	0.0	0.0	0.0	0.0	0.0	0.0	0.0	0.0	0.0	0.0	0.0	0.0	0.0	0.0	0.0	0.0	0.0	0.0	0.0	0.0	0.0	0.0	0.0	0.0	0.0	0.0	0.0	0.0	0.0	0.0236048317108	0.0	0.0	0.0196284500424	0.0	0.0102190767411	0.0	0.0	0.0	0.0	0.0101296912413	0.0	0.0	0.0	0.0
PIAS4	5.40078636029	5.22960450007	10.2261957126	8.5135430258	6.82548880568	12.1316028876	8.6149986783	5.32946443018	13.4143362561	8.54250111823	5.4308361182	11.3650909525	5.92808685554	6.38562072528	9.34482926667	7.9664097528	6.90786258084	10.0995010563	19.9387022482	7.88269498408	5.62882760649	4.46614493984	13.838791562	9.64398491205	10.6938381184	8.27033670693	9.429767229	14.8604416338	25.3618297872	10.6878689963	8.24031093464	9.24978048197	9.58815683794	7.53086369389	12.5462464437	13.8710755117	6.51680023361	13.591210409	14.6511174621	11.9624747768	12.2615143983	5.34121790334	6.04579607158	11.0234264782	7.194125612	6.45704690685	5.97584988581	11.5199169404	8.6089851964
SIPA1L2	1.89060977544	2.97893594781	1.01127891168	1.16185555669	6.32659052009	4.18090035387	11.1829187039	3.44750993891	1.21042635244	15.1610379631	6.905457517	5.30482931026	1.19432386346	1.80680560539	2.86650239831	12.1876345817	3.45008115387	2.04177867222	1.01071336612	2.75614538912	2.90727250362	6.83212771381	14.0756994752	3.98150344582	0.707527787388	16.9801064075	8.364297291	6.52506080057	18.0109893491	5.28981159708	2.11269965844	6.72011425332	1.65444304121	1.07717751727	4.25633947408	4.93509976906	3.43754632995	3.25755205726	2.13595256301	3.72089944774	2.06264059149	2.84901230412	3.45895865951	11.9120377998	9.22969581537	3.30862752516	1.99786236235	3.71307597815	2.31222348585
NCKIPSD	7.41208803935	11.0638262119	22.4847410446	26.6513274786	4.76407367609	19.4289020888	4.17169181796	8.13327214781	12.2571201291	12.5979599309	6.81248252673	15.5672518898	6.73286752811	5.56552100014	20.2814667174	9.68652177505	6.33388451886	18.7873060043	14.3406449484	12.0817150382	17.6452853643	13.4778029924	15.0941193519	5.25963292625	21.2747068614	6.49341290563	10.4937059999	3.94496988048	12.4774586147	10.0785128913	9.81601277933	4.65992848364	14.8637588764	11.6512425646	11.0627267031	22.4899509438	5.50828244244	12.4556846405	10.3253674172	16.7464963726	4.54181055551	4.86801453493	5.46963404432	3.42541830225	11.1190175302	4.37735851204	15.7113909714	16.8474288862	8.0254438552
PI3	0.15303578172	0.151029706761	0.0	0.329700605669	6.43672782368	0.262865920454	0.582909130448	1.26398995625	0.0610250008292	0.0540873064623	5.99648843793	0.024074679459	0.0	0.176973860291	0.0	1.25997180173	0.0	0.0335882339244	0.0	1.45333893426	0.104714270047	0.0322895677767	0.256439333976	1.23205402767	0.0	0.0621765076154	4.00901954494	0.0	0.123967227448	0.0295948629394	0.163612333304	0.488698603045	0.0597794930161	0.113436723292	0.0	0.406204070418	0.326557883715	0.226152401875	0.0839336460149	0.0	3.78773370293	1.00976328258	62.9828713802	0.0	0.0291777241646	0.029544804047	0.611015258133	0.118555533126	0.0
ZXDA	0.549604215642	0.928012002694	1.760659911	2.63640243614	0.178666186004	5.44391454645	0.985837173654	0.658621698575	0.93885719932	0.390768625135	0.640065349549	1.7528508959	0.305846414747	0.188686061791	2.36679847913	0.900621711264	0.619500796292	0.805750128039	2.51509089456	0.440204969176	1.81177157893	1.4721860436	1.92016978682	0.983864348943	1.67205691549	0.750139231921	0.163281165909	1.82223677594	0.434774436161	1.14173714489	0.958273816243	0.898109927265	1.27471447982	1.10202273566	1.30198466725	0.544524364003	0.297776645483	1.49906381484	0.865447109329	1.25119960607	0.345606114516	0.695404910341	0.289694146798	1.36759357308	2.56237596005	0.700462552159	0.694311211266	1.10601387888	1.03962052641
KRTAP10-10	0.0	0.0	0.0	0.0	0.0	0.0	0.0	0.0	0.0	0.0	0.0	0.0	0.0	0.0	0.0	0.0	0.0	0.0	0.0	0.0	0.0	0.0	0.0	0.0	0.0	0.0	0.0	0.0	0.0	0.0	0.0	0.0	0.0	0.0	0.0	0.0	0.0	0.0	0.0	0.0	0.0	0.0	0.0	0.0	0.0	0.0	0.0	0.0	0.0
PEF1	50.2926842625	35.8359246275	52.6059142871	59.6609185683	36.0653608558	40.3361971178	27.8729911637	47.3380279372	45.1092038123	46.3851477293	35.8436698394	36.876571335	37.3527428429	37.489150811	50.3830579562	32.0542624165	33.8292322959	72.3001591268	44.7532785586	44.047777079	33.2713175144	33.4556314989	38.403258427	28.8195215772	44.0910221525	32.074004124	64.7266301103	24.2112919062	34.1023850738	41.697607055	36.2971243134	41.454851981	59.8705849378	43.7626857326	68.5709761813	54.2126684955	58.2616510036	38.9946350829	49.1908453093	28.820356915	47.680468249	24.6955829252	47.2772049255	36.038226095	40.5806984522	22.3521632916	39.9573798452	45.5608461302	28.0834204031
USP6NL	0.55087493594	1.2002108112	0.435570217944	0.523525266406	0.695034291799	0.899767908857	0.818361222454	0.727507714926	1.10082192032	1.72061387649	0.610388591557	0.882253430726	0.748863836453	0.92033385619	1.00225913947	0.606969939412	0.507183435631	0.413481518465	1.07326351791	0.87495986549	0.954390228114	0.857958507046	1.10046863003	1.88030835286	2.0082490239	4.82613728138	0.668591076002	1.41534781749	0.964499421239	1.67612117075	2.36642280021	0.692935528736	0.553749541137	1.09572230781	2.38807200375	0.438254079417	0.670004710226	1.77331063408	1.1867019001	1.10500728928	0.709387759721	0.333170648105	0.383258947495	1.95045321758	0.749194874297	1.13552985006	1.3603758665	0.814019553706	0.795715348588
LMX1B	0.0212045119165	3.72193671688	0.0362135841753	0.0244730595375	0.269127383153	1.9447005658	0.00641011184046	0.0238282187293	0.0100661593706	0.313154371523	1.11277031368	0.0452711339467	0.0117693401265	0.157637265264	0.00485392424142	0.0178143525998	0.0252144752786	0.00332425574175	0.0174299468054	0.398824032975	0.0103636593169	0.0255658052928	0.250627662106	0.118810822056	0.0163835765519	0.0184609836505	0.00959942017413	2.64736858457	2.8985844886	0.00292902845901	0.526267629551	0.270854704316	0.0177492800019	0.00842019588415	0.195146771663	7.97346772074	0.0807992705418	0.251803049515	0.0	0.00873967695217	0.115815098761	0.0	0.0418041799159	5.46013801357	0.0	0.842133337446	0.19351261966	0.0586677037854	3.85660846553
ZDHHC11B	0.755307468298	0.309685789623	0.414398628006	0.0818858684019	0.0246209746382	0.144936067556	0.0193031777014	0.0	0.00485005860585	0.254696455627	0.0116554993331	0.11480239709	0.132315914755	0.0168783334525	0.859475540111	0.114443719732	0.156921904859	0.216227725748	0.0125970979185	0.149633308944	0.0	0.485023999277	0.015285691705	0.0225967951039	0.0710451455931	0.00370618232377	0.0192715632284	0.521740149714	0.092367110327	0.412793306235	0.0243812800404	0.00582601433796	0.349203637612	0.0	0.0445809435265	0.925466408737	0.0	0.087622374301	0.00500306960234	0.049127578019	0.0146846895558	0.00364784256228	0.0559500387764	0.126605327044	0.848734179687	0.0105665404556	0.0218526324758	0.0600677285348	0.276688851866
KLHL33	0.0	0.261946961076	1.49589510671	0.697774845976	0.0106607190239	0.0203534133255	0.110327555644	0.0093208880295	0.0756015576564	0.0670067113875	0.0201870162004	0.141669732104	0.0368305168746	0.0	0.24303491854	0.0185825148787	2.36715605272	0.0312083912631	1.53815772115	0.0716102566181	0.7567381226	0.010000580036	0.0297837149163	0.00978426268588	0.0	0.0770281157146	0.0600801069406	0.173498903677	0.0479932167453	0.0824938933143	0.114014874778	0.075678769178	0.342520771981	0.105399338711	0.0	0.0279572670879	0.0	0.140085814152	0.0	0.182330709004	0.00953756004431	0.00947695008129	0.0	0.0168674672198	0.23495663871	0.0640533889134	0.132468632721	0.0367184877154	0.0
APOBR	1.22485933079	0.335523326923	0.573467699405	0.581113257659	10.54325713	1.17495070161	3.27685694882	8.69614518555	1.03071419518	8.83496610025	3.82828236181	0.571468894374	6.53823261113	3.94775851504	0.223879575376	6.34503204831	1.70570073799	1.44637560806	0.273335763906	3.48803783179	4.81725223034	1.03178452729	0.692612750197	3.06685546489	0.841308753516	12.4363919075	0.752688713179	0.559384692161	0.221642091321	0.634954974727	0.242732617111	1.77724165231	0.727695516251	1.60094007417	1.35529830426	0.295309692661	19.016304354	4.79185748196	0.21073055825	0.456850940258	6.87872372474	1.78324860616	5.89871579699	0.638094683584	4.07569409331	1.88815606876	1.92455304368	2.7194847835	5.78682987355
YPEL2	2.38812805292	4.64929626242	7.87791488439	4.34785144795	1.91115805903	3.6247146507	3.4753648709	1.78516783541	2.36990864149	3.27495301907	2.81184382664	4.3098120617	1.59128485525	1.62119245789	5.0216806124	5.06885852116	1.71588087498	3.5397704595	2.10103760306	1.60745426505	5.40274647611	3.8134922115	3.31202332602	2.31137203655	4.18345090487	12.5815888491	2.19760303939	1.99057562268	0.883075188114	5.30984836665	8.23464441389	5.77492663868	4.73793004193	2.25992927886	9.76367413919	1.31007231008	0.77395763251	3.91078352895	1.95294622774	1.01116862358	2.20183932911	0.825026074834	1.88093352927	2.057594541	5.62933134313	3.52473227965	2.23728732166	4.35285661146	1.52345519541
SBK3	0.0232372752769	0.0229326686318	0.0	0.0521483688243	0.143730338787	0.0623658043182	0.0245861526512	0.0	0.0	0.256647827539	0.061855939443	0.00913887503149	0.240755273465	0.0	0.0	0.0227758060651	0.0322369278233	0.0765016222674	0.013370603931	0.150462302345	0.172250381497	0.0612864493656	0.0121682151072	0.0839451116359	0.0	0.0826088533745	0.724103630986	0.0664532190688	0.0117646529995	0.977389818879	0.0465810771298	0.092756280907	0.0113463050889	0.0	0.0	0.0171330225608	0.0	0.150235123549	0.0159308268916	0.0111737536472	0.105208071883	0.0116154986852	0.0890783512098	0.0	0.0886081412788	0.145799720498	0.115972303929	0.0	0.0309135282324
FBN1	9.67760084216	1.9776623845	9.32358948127	7.23001068007	51.1656472413	15.2563916989	23.725445911	27.0286358768	13.1201319448	9.45561116067	123.523148352	21.4703290034	3.88151718367	53.2363470907	7.98353701336	44.3234746249	46.0873430731	4.98963809978	11.5874681486	56.7994176214	14.360302092	29.7271149751	13.7234610748	35.1052617994	7.1204429721	19.0215485773	53.1170706194	101.670668879	6.15750669368	20.8526395866	12.052615585	215.002693232	8.86109894843	88.0845516994	38.1574228849	2.74580774348	15.972084997	23.0736470358	26.0124597523	12.6008375999	23.3744462826	43.9481221747	12.0195471357	85.3560283828	10.7239193567	84.8280139263	17.4093228465	9.84007048653	18.9013593982
HNRNPDL	29.1285780549	27.0057719027	27.0383673802	32.696303499	25.0691519121	22.6222502349	26.6735511338	30.9528767984	52.7892742944	42.23047204	30.5619849812	39.8062427011	27.6916926574	27.0762249903	30.7788789844	32.8048136708	48.1679513072	40.2331102916	48.8487054764	29.5762652316	26.337264321	41.7089877946	27.0409915679	47.2212495454	38.72280458	37.7692194694	36.9622670334	45.682729066	63.0386029008	67.8558972851	67.1139524141	37.600645436	39.9381651105	32.3559609463	45.0843923117	28.1917691317	40.5269664223	30.0548633366	52.7588490466	48.0151457126	33.3304909883	37.4648619388	17.4614390192	31.1056040174	32.0723931092	30.271813407	43.7346891195	26.6393265383	37.0476845103
POTEM	0.0	0.0	0.0	0.0	0.0	0.0	0.0	0.0	0.0	0.0	0.0	0.0	0.0	0.0	0.0	0.0155173577853	0.0	0.0	0.0	0.0	0.0	0.0	0.0	0.0	0.0	0.0	0.0	0.0	0.0	0.0	0.0	0.0	0.0	0.0	0.0	0.0	0.0	0.0	0.0	0.0	0.0	0.00791374182046	0.0	0.0	0.0	0.0	0.0	0.0	0.0
IL2RG	1.13896326067	1.408198797	0.474266744058	0.430790872897	16.0686352667	3.02935115584	5.46347070437	9.29898394263	2.7386664261	5.7441503337	7.35135428708	1.20792087373	57.6185813616	51.8265128538	0.666447315683	12.6309999259	3.32881319914	3.58116289744	0.346085487258	31.695211081	23.5405014124	3.17943440796	1.0856164087	1.14255727514	8.59646261676	9.57989046628	5.87358145478	1.01740841484	0.174935275037	1.97366639754	0.136817849734	3.34083926536	0.781086219889	1.54739404145	2.18898893722	0.169840397559	8.44494068636	73.3060310092	0.552730428675	0.793822324326	40.7644853854	1.77195274145	50.2742722341	3.8483126462	4.37358227769	4.31742717487	1.26460234023	23.4341978411	3.37091864378
OR5AU1	0.0	0.0	0.0	0.0	0.0	0.0	0.0	0.0144827476222	0.0	0.0	0.0	0.0	0.0	0.0	0.0	0.0	0.0	0.0	0.0	0.0	0.0	0.0	0.0308518548174	0.0	0.0	0.0	0.0	0.0	0.0	0.0	0.0	0.0	0.0	0.0	0.0	0.0	0.0	0.0	0.0	0.0	0.0	0.0	0.0	0.0	0.0	0.0	0.0	0.0	0.0
HSPA8	180.806224649	303.633262046	146.006853248	109.869956103	49.1136907037	160.869769122	159.803400771	90.5878212077	178.010493747	138.043482978	212.228863551	268.001496424	400.800432244	64.9873270898	200.755663944	167.955717318	127.24977123	128.336769723	165.56651474	139.663190457	216.635274603	172.76302504	243.388593405	161.57921677	186.005538823	187.980105	310.508036967	63.7591296447	426.2906608	287.538598174	83.6623939556	128.684581773	194.945666922	452.643394105	127.936367248	112.160277501	253.049138389	223.109803241	200.105904279	218.183935354	228.795215972	267.724381169	156.151538991	181.931167411	139.468739262	82.1324470835	135.743799951	226.994323351	126.982497095
RAI2	15.9899395673	9.27942185798	1.60236132543	1.01575953188	2.12092199528	39.6971902269	5.0953910567	1.09937421443	32.4047176505	0.672491698827	31.8710486823	3.19993073566	0.44487387488	4.84476404387	13.6743117242	6.46964925908	1.85011933594	1.87003965543	94.7956441022	0.697796184789	0.821885878267	1.78352449748	4.88139411838	1.27916360588	25.1358556046	1.27248420105	51.3756061837	0.647196568322	2.50297255121	0.358197168338	5.96777857721	2.51651822982	15.4243973527	0.212185510826	1.466308379	3.40674013817	3.21226097673	32.16213618	0.277057858985	2.09872242417	2.30407371597	0.107737958819	0.506068314119	12.0027565094	5.32933023633	5.25984275953	0.33615160559	10.6118845187	3.79922781755
ZSWIM1	3.87774653664	4.55705004983	6.00818541873	6.47521154303	3.98796362047	3.58095484296	4.85188055426	3.5118440099	8.39699456757	4.01234445469	4.34622303287	5.27751055629	2.37060040846	4.07865628858	5.2324917673	3.97577234367	4.17624801327	6.26416317158	4.91018408283	7.17879245353	3.67306700105	5.88066610713	3.90085994453	2.88989805976	5.40879313956	4.32738613024	10.2066207677	5.21642170343	8.07898987782	4.11951086743	5.38673960924	5.74345283466	4.60900107042	4.67436931812	6.46061430781	10.9661244294	2.86480539684	4.19415106302	3.23564356947	3.47778542553	3.65764911038	4.75023138717	6.15139256227	3.92091859489	5.79424923848	3.42301468975	5.41120320245	4.62590289073	2.19755106438
CNR2	0.0100839336946	0.00331724936433	0.0200918534204	0.00301733995482	0.0340213695991	0.018042638478	0.0213385717719	0.0297455899487	0.0156376080668	0.0118798537605	0.0214741594107	0.0132195375408	0.156715461601	0.0349838316136	0.0	0.0988367678501	0.00932625243459	0.0184434820845	0.0	0.029019502546	0.0191663918974	0.0141843019468	0.0105609175655	0.0	0.0145437763681	0.00682829175753	0.0177530197993	0.0115350848479	0.00340355397018	0.0	0.00898404228363	0.0214677650519	0.00656504900462	0.00622887222492	0.0186673155231	0.00495664147171	0.0143451769245	0.565025892904	0.00921768438344	0.00646520957127	0.0980749441404	0.0134416124868	0.0309248025517	0.0269144292801	0.00961298830014	0.0032446425457	0.0	0.0911392840306	0.00894338844943
HMG20B	27.0559723372	15.9376398551	51.0214661528	49.0225493571	20.2625663458	26.8142236497	38.3011079528	25.6667894448	56.0686642849	33.9756209761	16.0008822267	32.6226325262	21.4960065593	24.5793520619	49.7000816153	21.3980380923	17.8049475248	65.1658153817	33.0958673067	26.682969874	29.4973067094	17.8920203705	18.9752225337	31.8105304108	28.5087654896	19.4494144863	24.5845788181	21.1131370299	36.5619915485	18.9445718135	37.7115505223	24.7983688541	74.8833778617	23.299702972	57.9365018947	46.0684188895	24.3382904936	30.6771452842	27.9943082206	30.7713065957	26.4707424649	16.2960296824	20.7960651258	11.8950410912	33.4004678357	15.9644892895	24.0216918009	36.7394744684	31.9246899441
DMAC1	15.9355037242	14.6285964358	10.1832719413	15.002320868	16.5110444455	11.166971458	10.6880922805	8.62452448482	13.5876978541	6.72540499109	13.1065312967	7.35764736202	13.7306745045	20.5453201784	13.9511005154	14.5631540754	8.23202188895	25.4787802944	18.7110014158	8.97658095792	9.50610105392	12.0791505936	10.9001248502	8.00820375461	20.6569812806	11.0916153798	10.5462216519	16.8078797926	15.8556150026	10.649879133	6.2464189296	7.66983135564	11.371115676	5.77622630921	4.38735925559	16.0159494898	7.90752295732	16.7027117929	13.3585293762	10.4565476464	23.7860643467	29.5436337224	15.4354966976	8.85111908627	12.3180084401	13.7458481103	10.8587187614	9.4058996094	5.72477324827
SMTN	371.761827582	5.72622600655	42.2394687166	64.9680081369	16.3258232396	23.820254215	22.6115787667	10.2879997826	62.3608715831	13.0720496295	4.5495822548	57.7751077777	18.211201839	11.6590524305	107.753217769	27.8251769188	14.7067370158	69.2809008988	13.9516938765	4.61856489878	6.6523892698	74.0186164719	56.4513937184	11.5611810847	2.1169877997	22.2919231504	11.8173030028	39.1806414811	3.40639657911	15.9758340703	7.42689688263	24.929903298	64.3144288596	15.4893265877	24.0206058614	4.76753703361	6.40221800609	6.45314904553	36.2513572026	18.5727379506	16.0474895385	5.97827330101	8.69610661269	14.8989834004	126.672613827	17.331973804	17.4660041906	129.728312715	23.7167912498
MSX2	5.24363959816	0.176591650962	1.13468166875	0.230463628214	2.51979948368	2.96498572776	7.30956066135	0.397784294602	0.553248535418	0.261215480505	1.88042055907	2.98015896622	0.413102110196	6.36974920797	0.0373987378777	4.27021280234	0.733922656346	0.0426881298996	0.00895300351328	1.947835033	1.65911380673	2.15037141809	0.309619429337	0.0160599835981	1.43905541602	0.323988907634	12.7625630341	6.61230021916	2.86746573198	0.458876824176	0.987710357936	2.96885477779	0.0607802069961	0.295547639088	3.5083435029	12.0115319049	3.6854718552	1.17843334167	0.0106673378305	0.112229772315	0.164377956658	0.0	12.8002843779	18.1830590722	1.84671857441	8.68889259423	0.0	1.88344004994	0.0827992298032
WDR19	0.995172388732	2.20782180233	1.38481758055	2.18509482046	1.24452510595	2.68373276998	3.17566751161	0.96286359566	3.92075829739	4.29101978035	3.61334053106	2.0414720413	0.814546749624	0.927575987991	1.48619906465	1.61917936052	2.43813338483	2.39169953984	3.36927766724	1.9481699961	2.98480318456	3.57797378052	3.04544107438	3.57453641472	3.21006943952	2.31072302006	2.88453578692	11.8255424357	2.71871809788	2.74628520818	3.47113808162	5.38661742655	3.56084469771	3.08343846995	1.47012104991	0.733748289541	1.50136026738	3.05157913846	3.9844123789	2.55345393839	1.63406684096	3.18568109549	2.05395221804	4.14183195402	2.93526326677	2.44000191114	2.56281408253	1.41662371298	3.44219158049
EFNB2	3.01662650938	12.0411675386	5.33373897335	2.79321673176	9.03780916146	12.3462203787	12.5868315232	0.840798007213	5.30157829628	12.6834309297	2.61766681726	5.98802200449	1.67654395207	1.25439199122	1.51609783014	22.8233896815	9.55617873873	5.15681412836	23.5943653426	22.954860733	4.93004454371	16.7433315745	6.97371564039	30.5803544219	0.873585082478	14.2747421401	5.71647874273	10.6918626468	14.6313146921	54.5895988341	9.95149736556	30.3470439383	2.34668346273	14.3898272349	9.84078608147	0.572099314201	5.3008740893	4.03667589144	4.59219209068	8.91275298763	6.36096246514	5.9287213374	2.45242026052	28.2753425246	11.5331609846	12.7329694346	33.5090026612	7.6441742867	6.57797748024
DCTN3	20.6163094473	13.108902036	18.4875672742	20.8930348183	17.4340638649	29.5134996452	21.0736197409	17.7269682821	29.8512548263	13.3428323396	13.9573461817	25.2490989694	13.8086667676	21.0725993154	17.2741170379	16.4117343084	11.7063145496	33.5788938808	29.9035344431	9.4681286941	15.8697089447	13.8039369953	21.606325225	15.2989164341	19.3126709174	12.3742887469	18.4204403065	13.201376174	7.3250378505	14.6335123291	19.8084992592	15.418375592	12.7411118343	10.3910995776	19.1960298008	13.8218598049	12.9629596759	14.0346461788	29.3945054048	29.2498994137	21.0276116387	17.9293607726	17.4932733003	8.84327706701	15.1790010574	11.5684971153	10.6520871245	10.1100846069	16.967394175
RNF227	0.726245250251	1.52993272106	40.5220126584	1.79906717406	1.16228394312	3.7633533671	2.93322814469	1.38012166635	3.74994487763	3.17143241913	1.91090582713	1.80710503193	1.31134989797	1.04173154156	1.63367466817	1.57422336899	0.862200790022	1.75488893363	5.3199037167	2.82600211997	6.05236611324	1.11241327469	2.31836012941	3.04161737602	2.28876426596	4.24864197144	9.34587756062	1.94908421417	2.04348626716	2.31599403686	2.85564657897	2.86550522527	1.65030639142	1.30698930868	3.78506136576	1.66818326428	0.916415166672	2.27028753611	1.14898490512	1.80653396254	1.03280574587	1.158885974	1.14572582371	1.21769907481	2.49637408704	0.761704534862	3.80576253367	1.88665731408	1.35633257915
SEZ6L2	0.760554323661	6.09372896988	31.0420817	15.8376753108	8.31645803672	21.1457405076	24.0683479375	1.31820488868	0.294142483721	26.9789195425	0.073203720061	4.47151146796	0.127992767037	0.581378507754	0.654098769126	0.724392547161	0.613991900244	0.391380562257	1.99277302773	6.06535139965	4.50823382903	29.2204247187	13.2664927414	8.64835978063	2.0451168161	28.6788536252	6.70395321749	5.59849776688	25.4441678654	70.9640168969	37.6928182665	0.185241740556	9.24003332963	0.051757230013	18.0454114084	0.716001935532	16.5868045312	0.18255891273	0.866078822547	3.09102456124	0.773858129172	0.0644363430709	0.1383640375	3.30297019416	23.6148242213	61.6898455792	1.73275601938	11.5092759653	6.1107997268
FAM131B	0.736075929766	0.0704742662776	0.151038242677	0.160256884599	0.21930408825	1.3710777758	0.59282070094	0.178239152462	14.1612358145	2.34669513424	0.181315823736	0.671870762813	0.359260785209	0.308088646551	0.145232734807	0.209976638187	0.384837726238	0.0783655809229	3.87502143663	0.2223004467	0.203592985906	2.41943270715	3.0346733664	7.74480845109	4.91099108537	5.84447084394	0.0754318356659	0.361307082215	1.97733993618	0.244325614973	0.814842854675	1.74099067342	0.227984854975	0.867786522736	0.0549115198647	0.153904103128	0.0732596807556	0.410951975368	0.0677865355763	1.77501071934	0.348184723123	0.0411871493035	0.210574018412	0.0684194836746	0.568166977438	0.567361324123	0.224802301114	1.73941986273	0.0840386428465
EIF3L	31.5509838664	31.6850903005	21.9627211306	32.5770957156	12.7644317631	36.6782934603	18.9420968447	17.9064543267	48.0741963624	30.681698164	57.432491051	38.5303140154	22.5469891519	7.10709061893	42.0128158689	27.3424188007	22.5496409651	35.2600773221	26.2698753994	27.2391871378	26.7596309613	36.4034661584	110.60816894	37.9497113353	21.6201123747	32.81103226	34.1571770556	18.0010261799	27.918156903	104.774791087	25.6392542044	42.1852801877	57.6083814244	51.3636848954	39.1399099349	0.290974237904	10.1492761188	18.6576916005	50.7519951828	22.1473368845	25.1058285337	62.9739560652	4.28007377638	32.9857868496	54.3314761245	27.6186148669	57.2328718971	41.9499619451	27.3170241797
RCBTB2	6.01298091876	8.44646735662	5.66375348803	4.99070922449	7.80990743043	7.28953335708	3.18364668914	6.78427868619	3.15197715613	9.00156961492	5.17712402158	0.881662979061	3.80658196832	4.77587799799	6.17854578998	5.0000122178	6.19931126535	10.1794993609	5.33737913536	2.87088014968	13.8281716701	6.30145716445	3.91305083844	8.31447322922	0.377215096802	9.32569564736	2.25226677906	13.0385527305	6.17934665308	11.1754209662	14.9728707613	5.36913648579	3.93091059464	2.74644066692	3.74605682868	7.21394493515	2.68949204077	7.09504517385	2.4590545769	0.776142481828	5.60872293701	3.17252198785	4.03332702662	3.36844985715	5.6609229441	8.71362530505	0.875173786939	1.55820262794	2.74376093739
CDC20	3.52686653025	0.675602269212	20.2734056952	10.2368425051	10.9244802777	31.6855007705	5.19855981377	37.5925226341	73.4636806351	1.96775088027	1.24561715149	29.8474402942	46.5178644792	14.9212583896	3.15197835149	11.4491451411	26.3273516531	17.1456727119	46.6598649684	123.899332128	18.5687653652	27.7729258511	73.2204133551	14.1316823289	21.9340557444	9.13619406282	96.7618570416	19.012272497	72.0643299949	17.7884439891	23.7863672367	12.1895771235	13.3536769058	74.2769387119	104.430532088	14.5928291864	19.8224160574	7.21920523587	114.836404171	49.7939306299	105.337932899	48.4011788783	17.8317550473	22.8819193734	6.41865549411	1.31326509019	37.7120536112	4.32156151203	33.3853970061
CSNK1D	14.5476641473	11.2756170572	11.7206658014	12.259407896	12.3103830939	6.49744871635	15.1395747247	10.9160163085	7.68706131938	18.0770213946	10.7001797596	13.7272800237	11.4732205111	6.88231500535	10.9866708311	12.3133147754	8.38300487386	8.68286010546	14.5640613211	10.8051514293	16.0879202466	12.8933702787	9.19583275075	13.2742232719	16.1244324804	16.5580822588	17.101428575	17.6032551889	30.4650726539	15.5845436821	9.02381606662	13.8687468018	13.6966699566	17.8876536314	9.59250555902	6.8105629667	13.1182277221	12.7986432486	17.4077232163	16.628215814	11.8531713046	5.6919315255	7.47004071778	10.2490312716	11.8462751144	11.399952691	9.13690068818	11.8194268907	7.86836784633
UNKL	0.664560026333	0.739573973171	2.84824623559	2.40948566795	0.479693946759	0.584411027814	0.940008601231	0.741491941242	2.48086904892	1.35969238165	1.14672030357	2.23732928847	0.726378000138	0.231643527567	2.911402414	3.6818151187	2.23946418799	0.693081150406	1.92005726266	0.844334314735	1.72805560202	3.21456995263	0.994630617306	2.0091266644	1.45555856661	1.67794017019	0.814003674681	2.32371672679	3.85134613167	3.13087111671	2.39349080599	1.21159952301	1.79045723858	2.05031882138	0.934450841893	0.236304938869	0.882529870765	1.24064690841	3.26677612769	2.10091617815	1.34674318627	0.772754606948	0.354126266245	2.48658743239	2.28248139745	1.85623688004	1.4348748359	1.74576344741	0.811985441323
USP17L26	0.0	0.0	0.0	0.0	0.0	0.0	0.0	0.0	0.0	0.0	0.0	0.0	0.0	0.0	0.0	0.0	0.0	0.0	0.0	0.0	0.0	0.0	0.0	0.0	0.0	0.0	0.0	0.0	0.0	0.0	0.0	0.0	0.0	0.0	0.0	0.0	0.0	0.0	0.0	0.0	0.0	0.0	0.0	0.0	0.0	0.0	0.0	0.0	0.0
SETMAR	7.96125858435	3.88936002678	14.0631753598	20.790810509	3.28509742907	14.9728284588	4.11740514374	4.1622978164	27.880236247	1.85920377449	5.37187706669	10.5536456489	1.43629722998	2.63372032511	14.4070241219	8.42430263248	2.78862530113	25.3678550153	9.58335319153	5.64223088357	3.5345298355	10.7284103076	10.6348903732	2.48866712473	21.2133373361	1.83050287937	2.86595753192	2.967684885	7.49481286127	4.14578646014	7.35093884409	2.1423138341	25.5480492449	3.70202988484	16.7560357071	2.88384265363	4.55872791572	6.99641161689	8.2888534468	11.889350026	3.01371656556	1.06913387393	2.72544293177	2.81909426907	14.3246102238	11.6181980808	4.24015811302	15.0256591359	3.66213077934
SPAG17	0.00369772387153	0.17881335424	0.0132616328984	0.117836096389	0.0041584839911	0.0277877788084	0.350157056812	0.003635848911	0.0430066963898	0.0294048767231	0.00590584346441	0.0581703938353	0.0119722314589	0.0	0.0770265741744	0.028994325979	0.025649146928	0.0243472499678	0.414891855648	0.0	0.00632539089377	0.206751941411	0.863596774027	0.267161996831	0.0479981162298	0.0732390049659	0.390596172635	0.0338388251205	0.0374419442197	0.0178771314029	0.0148247984165	0.100369442991	0.0577768299335	0.00513921084638	0.0102678052511	0.695221895368	0.0157808960556	0.0170762583598	0.00507011241108	0.142245440065	0.0297629386307	0.0147868994987	0.0	0.0115142713575	0.0669755841743	0.00356937854587	0.0	0.0232748391431	0.132819430345
DYRK2	3.02647520807	2.05239413136	9.40656812712	8.4475304146	2.62329819939	3.69838284786	5.43402141113	6.78936075932	7.68341441432	5.00142656661	7.85324153855	3.21452757901	5.38187188618	33.9296991564	3.45160333929	5.01384397262	7.48627438252	4.54604752897	7.97605674904	4.66527169606	4.7984812406	8.93679598535	13.0642591925	4.39286393576	9.97819865565	2.82464651973	10.5299626613	5.73667527884	3.95542156884	4.91386944625	23.0193798475	7.99544681834	2.99186791782	3.87106104004	10.6941672662	0.822904812272	6.92448897487	5.24694891753	15.2471470824	6.14497604199	4.15670755837	4.42411759905	3.39139504054	6.14315501317	8.49934442999	87.2065242713	4.36331440523	5.2724339117	6.72608563295
ACTR3	14.1133131353	11.5806455515	32.0078342653	17.0056743949	18.0411456869	26.7181751702	32.119975037	27.9430978821	32.2686164937	15.614548401	18.1612200563	40.765951041	23.7923916319	12.061459642	17.6944130068	18.0063643827	19.1543375942	18.1531511542	25.1675846549	27.0242732596	36.1932430782	29.1225638771	35.2475694286	10.5489593733	39.1546077191	18.6331676776	12.0376495285	11.4614788355	8.03655954093	9.9886555512	13.2549175972	15.0994199868	19.6439016002	18.0119304011	54.4024409929	4.33352141723	31.7110118845	22.9378109551	29.0763174763	16.5851926158	19.6885136704	40.3049031777	15.8424468831	19.4193530411	26.5925908802	18.9856764559	29.9975276124	20.8245662136	11.4926794676
CD28	0.375982443784	0.260451270357	0.354396439117	0.301809351771	10.0829233292	0.442446123736	2.35241919123	2.7833469139	0.307544350818	0.402482636072	1.69757516182	0.221802461358	1.39056500324	5.878082614	0.341781846739	1.95596850777	2.01116194952	0.614936274521	0.690618379503	0.569610954221	28.8309789003	0.942042356185	0.48842243976	0.167914772215	0.265920372087	0.767456661501	2.28746551685	2.07187125426	0.0549097417379	1.67441494448	0.0483133655662	0.727315574997	0.109444809783	2.73669868426	0.305176407682	0.362511609392	0.675008849705	2.68459335848	0.128881530964	0.747509251156	1.38583187966	2.49021073961	5.73748463145	0.357018848392	0.523849154582	1.18301991934	0.656756973568	1.2392996973	1.70736334025
SWT1	0.644728348087	2.06360076884	1.4842299158	1.2552655213	0.788753834776	1.00080655297	1.9404502719	1.01944396323	1.75159615314	0.869893060841	1.8832036186	1.40144445722	0.998593962336	1.16370571863	1.94752036343	1.14429604818	1.57129179523	1.24294692978	2.44641814797	0.879119487309	1.1475950429	0.905358381748	1.89792939729	1.2994364874	1.61157167951	1.71237690849	1.30225187889	18.0689810539	0.683708003624	1.56693630014	1.65335630451	1.60673830055	1.04652451871	2.66800850724	1.81446859444	0.35331048004	0.915626741095	1.62549130786	2.18614642732	1.66740848702	0.920419244236	3.64957020355	0.90844976626	1.28285326388	1.52408625835	1.71987344387	1.7045125203	1.75066077854	1.06054600557
CD34	20.7406860138	13.0087608819	8.8993655565	5.94125987022	21.8536899695	11.9505301468	9.77546922877	7.15010689429	4.79976403998	7.53212237975	36.1602079088	6.50179559134	3.9744598187	31.5701363855	3.70804219759	93.8763435567	12.7270649726	17.717551111	9.58077230936	4.62251180738	8.67295553584	14.168836765	3.15584288891	7.89310129993	1.66187294805	13.8479438177	6.42469057664	32.2211685095	2.46926271483	3.51008428907	9.95602522384	33.8992764761	3.60492260089	4.25632575214	9.55567064174	7.62141666133	4.07955420557	12.445306012	3.25438850944	19.480413496	12.4277169638	1.52827153543	10.1340031184	19.3354115023	13.6342545536	10.1259680222	2.90259090132	6.82655593933	6.24118616849
TTLL3	0.73265234544	0.549853044706	4.35897654499	2.51447208659	0.731970213686	1.42674187361	2.53285999045	0.732120008909	2.43688656149	0.814458819264	3.68283042441	1.63369404422	0.644336834145	0.843314165787	1.46610990466	1.17902426457	2.27154487265	1.08448030537	2.77055941137	1.07014770177	1.75265993578	2.51649906898	2.23589925371	1.83599777759	4.76245042648	1.86561315947	0.788310126755	2.67602913783	1.92883557369	2.74471867208	1.58479025944	1.85809668281	1.62729988355	0.988267518729	1.85463606837	1.19344353969	0.648985353676	2.35423232127	1.56059087243	2.83478076128	1.31484996006	0.856801319317	0.156757272172	0.577548424266	2.77587549972	1.13484542549	1.99662573	1.89083207514	1.11748005385
EVPLL	0.0	0.137425825011	0.0	0.0	0.0184238585728	0.0	0.0	0.0	0.0	0.0	0.0	0.0	0.0	0.0	0.0	0.0	0.0	0.0	0.0	0.0	0.0	0.00864150306454	0.0	0.0	0.0	0.0	0.0	0.0	0.0912360844863	0.0	0.010946697161	0.0	0.0	0.0	0.0	0.0120789398388	0.0	0.0	0.0	0.0	0.0	0.0	0.0	0.00728759077702	0.0	0.0	0.0	0.0	0.0
CCDC187	0.0	0.108681115112	0.0	0.0	0.0	0.0	0.0	0.0	0.0	0.0	0.0	0.0	0.0	0.0	0.0	0.00719584810205	0.0	0.0	0.0	0.0	0.0	0.0	0.0	0.0	0.0	0.0	0.0	0.00419908098044	0.0	0.00354941507297	0.0	0.0	0.0	0.0	0.0	0.568370484452	0.0	0.00678081146758	0.0	0.0	0.0	0.0	0.0	0.0	0.0	0.0	0.0	0.0	0.00976690145776
NDUFAF3	19.0606757748	32.2512087237	26.1694624303	26.4696035967	39.3546487053	50.4124780634	21.5412677477	44.9601726961	29.1499680933	27.7592989602	27.0783650761	9.32540720551	28.8105129425	45.8463800005	12.8470452144	16.8544707824	16.5581787858	35.6953091201	24.9908343055	66.1411840326	31.7160192991	16.258182091	27.0064385647	23.1333374669	69.1609865598	24.2832598451	37.532010717	8.45752357858	14.5467952619	22.8992744577	30.4079638423	15.2806255107	23.3825251956	34.7231604292	25.5148059039	12.7964109999	16.6748183335	17.3432597608	13.4703846381	35.9917898087	19.4548004011	27.1434256538	29.149188649	14.3887222265	24.8175604242	23.4488637135	36.6750737709	18.82304105	32.0271264886
MBIP	4.68497776055	6.14129988805	5.85038388432	6.11176476699	3.52204888063	7.66459190509	6.21232809839	3.35479401595	0.646422747634	5.16540015158	5.00469485588	7.05369364887	4.64953415233	2.61468162169	7.11539385858	5.17092233663	4.08334419095	5.30334775511	7.02642971516	5.58897168054	4.61107134284	4.02384065016	0.677321869753	4.77777565682	4.02115706154	4.76379082287	8.36994887747	5.68539097768	6.43514306633	7.12002224182	8.75172655586	4.48824855434	7.42469749613	7.33232017255	1.5045425693	2.54564701993	3.39575942372	4.41174884146	6.52153296469	1.88549037899	6.60938060198	2.64731550195	8.11301375424	4.24515191327	5.61184894766	4.01605724653	7.20767200102	4.07815821378	4.18669721459
AC011452.1	0.0	0.0	0.0	0.0275706158654	0.0	0.0	0.0	0.0	0.0	0.0	0.0	0.0	0.0	0.0	0.0	0.0	0.0	0.0	0.0	0.0	0.0	0.0	0.0	0.0	0.0	0.0	0.0	0.0	0.0	0.0	0.0	0.0	0.0	0.0	0.0	0.0	0.0	0.0	0.0	0.0	0.0	0.0	0.0	0.0	0.0	0.0	0.0	0.0	0.0
WNT6	0.197032445683	0.204683830419	0.223150529851	0.0837803506186	0.303220145672	0.122461097851	0.241386067134	0.887104434944	0.0827044638367	0.302371227936	0.176668989695	0.048941010151	0.214884330984	0.515666288628	0.0	0.284597271324	0.158250567588	0.193462704971	0.202875164755	0.279779188154	0.484874826093	0.0109401530283	0.271516250191	13.7968273069	0.044869642418	0.294927673821	0.153357736272	0.130487119534	1.65907167608	0.0200542993729	0.0554341258464	0.248366788571	0.010127060326	0.0384339338458	0.0115182707878	1.51390325011	0.0995781027676	0.383117838761	0.0995325884481	0.0299191524552	0.198238997586	0.0414693082829	2.067161738	0.156843674198	0.0593149037333	0.17017321368	0.165616349474	0.271135738487	0.124162379982
SLC2A4	34.4389514262	1.0079945105	0.4278859627	2.37835744004	0.294526735663	0.50607861774	0.120074734649	0.00429184735516	2.24241488671	0.43194983846	0.0929520790443	3.61182074403	0.107405652151	0.131238845876	15.450103244	0.282361451366	0.841697739804	0.708922596197	0.984520593951	0.197839705506	0.03484436783	0.23024073909	4.42963931467	0.144166733634	1.87916302602	0.261576229455	0.1752064216	0.49930248633	0.437554370581	0.443154911316	0.542486493909	0.12544794096	5.52003631661	0.0323544188529	0.37330755479	11.3154170949	0.0279422489723	0.258012725422	0.353108392398	0.0209887611761	0.0395245351614	0.0174548274854	0.167324634007	0.108733880382	0.644960395616	0.509819472107	0.139419003042	3.72381142133	0.197430936611
SEC63	7.97768918217	7.82643081235	12.322807512	9.34349131996	8.7034634022	12.6291661596	13.7546167335	15.0655487682	20.2608190624	9.7364899086	14.8099269139	14.1272725501	9.50081934816	9.69172501117	16.4082480136	13.5179063886	10.7792297799	11.0793568736	12.0112773639	6.33213774561	11.0375043571	14.2027545888	12.7554976354	11.3227653547	15.2412213262	11.7065468025	12.5285494088	16.4611441531	12.6323355473	18.9833175794	17.1339381599	22.6253168437	13.5669409725	13.0494372597	5.73140542862	7.87907543631	13.1394236245	11.1274316466	24.1697377755	24.4585360607	9.10047167188	10.3297453592	13.4941824278	16.2829270782	14.2612982108	15.3757704364	18.7506970608	13.1822203785	13.6308967296
SEC24A	1.71673801518	3.5022239061	7.18898736231	3.05129875211	3.25177393965	5.75805864038	4.89647177339	4.99651373901	2.56388336239	6.24080838681	3.01347774637	9.93075011338	4.21798157205	2.48726303427	5.53313660396	5.33158183139	5.45731210855	2.58100459998	2.1872755771	4.17642063502	5.64402305436	4.97794738066	7.02481653157	5.18921911356	4.21009000997	13.0704456436	9.35981903762	9.3897171176	4.79029353797	6.12762027595	5.32261525128	4.95744386821	3.26677786623	6.03310952285	5.2001401645	1.20790069347	5.27775314662	5.00141956721	4.80867175832	9.56166697323	3.32372378369	10.724262005	2.62863398398	8.65133471199	5.84486420045	4.720513784	4.35737627426	5.95149270206	6.55790941923
ASB6	4.73030886251	5.50165735303	8.17641930719	6.60946162792	6.54868917812	6.06678136615	7.1798800092	7.73940235003	5.03818463503	6.9344443912	5.86665176585	6.90647445478	7.68989636988	12.9730186694	6.79601902715	9.38509069653	5.85732842622	6.4321831317	7.87957287136	9.69421690965	4.72345485778	6.19154907239	9.82808463461	4.88238095048	7.65039295333	9.26391624429	5.56982367438	5.70387734075	4.78975625885	11.1760306461	6.56152890884	12.3480243654	5.57093269506	5.7883836851	7.18503601293	8.60372797154	8.32049280965	7.16395959111	16.47155128	5.49723537287	8.76506307802	6.17295147779	8.27276159673	9.75628974531	4.10507600433	3.80633214994	5.38520981358	5.83128035263	10.0697039303
SUSD3	0.503382305286	18.0222086914	4.01188020413	0.338902463429	4.02564956661	0.720539838964	2.07123249572	2.10357609109	1.10587480389	9.05611222584	1.31019009658	2.33167940629	6.08464634125	7.00163519063	14.1827976891	2.54915910163	0.911720555698	2.51653792542	93.4261157274	1.93150867935	5.35792160533	0.914589863534	3.88072608488	2.54009685158	1.14952258093	12.5693280805	0.472649202345	0.431867000884	1.09020980765	1.21683391326	0.990385741245	1.54050336366	4.45156064739	0.958733414711	0.295088430627	0.989727098998	1.10398800624	7.74880854407	0.191724915877	0.605134401795	5.68366084123	0.405392859891	4.84563661244	0.83349727864	5.61184894766	0.404925224112	4.46626513308	6.70254128936	0.61386483616
RBM25	2.82350823703	4.04306486792	9.19522418423	4.87397062408	3.03465605947	5.06474069452	4.11398750949	2.30183727424	4.52502002101	4.98560317122	5.53391327358	6.29720044669	7.34233543955	2.37310023038	6.39749998279	8.25851995484	6.18751118233	4.2212329494	3.93647536798	5.32752515008	7.02073905053	10.3233688059	10.663210369	5.16454620537	3.65183138024	7.6930831913	6.32053971987	6.00312570837	11.6817577803	14.6211400195	8.81234321294	7.36393670618	3.26487321742	13.1317164083	8.05035828849	2.53855945712	3.52252115582	6.07115457652	11.8266675961	6.77989338426	6.90421872524	10.7029097287	2.70364326006	6.05084010301	7.30264381147	3.07194460623	8.02682073232	8.93369026673	6.23463224084
OR4F17	0.0	0.0	0.0	0.0	0.0	0.0	0.0	0.0	0.0	0.0	0.0	0.0	0.0	0.0	0.0	0.0	0.0	0.0	0.0	0.0	0.0	0.0	0.0	0.0	0.0	0.0	0.0	0.0	0.0	0.0	0.0	0.0	0.0	0.0	0.0	0.0441767502839	0.0	0.0	0.0	0.0	0.0	0.0	0.0	0.0	0.0	0.0	0.0	0.0	0.0
TTC4	0.490703788665	0.58310227471	0.915853556806	0.880977717048	0.366022049957	0.397783139762	0.704612506375	0.79266660568	1.2911854348	1.16356717365	0.687763686191	1.02007154023	1.1802264469	0.573250797923	0.746172153234	0.971733285137	0.889143277189	0.774776849275	1.26192419522	1.95070585348	0.805144964393	0.734255799374	1.10124589233	0.708037184457	0.666203510608	0.966318476024	1.42278448885	0.893529192265	1.20161570642	1.14745333488	1.34500053726	1.14326652781	0.767701232327	1.98567333692	1.18461185917	1.52103544775	0.625052343967	0.64745502635	1.57908054475	1.04976892785	1.9395697844	1.24144553001	1.32827010117	1.27852484272	0.859200008998	0.497838743781	1.18951348651	0.85823348757	0.72607787887
CDK1	1.47356600891	0.749293299179	7.31499660648	5.74276781241	8.37179946077	11.3822749046	3.48896957389	13.5967689443	42.5803560373	1.04398408076	0.626647400757	11.6365707269	10.9267739351	7.47086304774	3.45541124324	5.08147874621	5.39113618698	9.42151243248	36.0246450396	19.3930890838	10.5285656741	8.74916682798	34.078926653	9.67280024589	37.4678350294	6.15118785515	16.6569842152	21.8514277777	9.54388395559	12.3065317604	15.3157854823	5.42295077669	4.38288917614	12.6460303748	29.6504668612	3.77615129653	8.45534870684	4.05810090603	37.8160789513	14.4911447453	13.1489422337	15.3559788367	2.6384051356	26.8875429984	3.15211459589	1.02344824642	15.3990922251	3.85885291901	8.00275829826
GOLGA8O	0.0	0.00804655039713	0.00974723895393	0.0731906930868	0.0	0.0262592860287	0.0086267202285	0.0	0.0162564291221	0.0648373459046	0.0	0.0192397369084	0.0	0.0	0.0522592397553	0.0159830218001	0.033933608235	0.0	0.0	0.0	0.00929826620765	0.111820890071	0.0426954916044	0.0	0.0	0.0	0.0	0.0279803027658	0.0908148652597	0.0473025925652	0.0108961583929	0.0	0.0238869580819	0.0302183699628	0.0724491787689	0.0	0.00869916430764	0.0	0.0	0.0	0.00820335843146	0.0	0.0	0.029015781561	0.0621811517746	0.0	0.0	0.0157909839829	0.0325405560341
ZNF454	0.238832401043	0.314268877419	0.333105117249	0.934987733752	0.208905239355	0.249275791865	0.701933734595	0.0195696631093	0.53791559083	0.0527564580125	0.2754936206	0.11480239709	0.0257758275498	0.475662124571	0.680351695326	0.143054649665	0.138054461752	0.626113953343	0.290114982365	0.0143189769324	0.0378287840078	1.30179601538	1.25064750313	0.0547801093427	0.688922623933	0.141508779635	0.483541041003	0.941029506393	0.967335555425	0.692799954521	2.10122304348	0.0317782600252	0.945894825444	0.00614697495675	0.0147375019922	0.381534777386	0.0637045488404	0.563724366132	0.418438548559	0.497655985128	0.0400491533341	0.00663244102233	0.0	6.51028791282	0.626115378458	0.525125040826	0.0132440196823	0.950804686969	0.55602544394
TBC1D3	0.0	0.0	0.0	0.0	0.0	0.0	0.0	0.0	0.0	0.0	0.100264789868	0.0471340912918	0.0110866461363	0.0	0.0	0.0	0.0	0.0	0.0197026834466	0.0	0.0	0.00903106185514	0.0	0.0	0.0	0.0	0.0	0.0	0.0	0.0	0.0	0.0	0.0	0.0	0.0	0.0	0.0	0.0	0.0	0.0	0.0	0.0	0.0	0.0	0.0	0.0	0.0	0.0	0.0
MMP24OS	11.0182290889	20.8073935384	3.65091717366	3.59262430205	16.5616137745	5.56302345672	4.90334775184	6.2902037538	5.38186563695	5.63670312107	10.7554178183	5.24899016429	7.46632657373	11.0479690806	4.31573453192	11.5193792007	4.10701873503	8.72533753473	2.31563895255	6.78844035134	8.93533614977	2.52202931334	4.60177540522	6.27207741086	8.56203150021	9.35105208482	14.7094639237	5.42346715546	1.84367266871	5.80686721723	4.77138024236	6.58922662209	7.22113521151	11.1246982763	3.50579055774	29.2260773858	6.59744884237	7.14619071601	3.40607263333	8.05749600032	9.08803490839	3.89873173916	22.5540008089	2.03579316805	5.51282464054	12.9348448008	10.8157401915	5.95776669349	3.82589004815
GRB2	35.7288382097	34.5804803	38.4645394787	30.6002559008	62.627594254	22.8668268169	38.9756207716	37.5427581874	37.0307322373	76.2540531541	26.5435955507	38.8544039061	59.7982802317	52.1655745908	35.5289860214	40.2789840493	29.8354270847	34.5691300078	34.6091108266	47.8565409995	50.6960283111	40.4186992561	44.9998965678	33.4954523477	27.7799173621	61.2840980633	41.5422982187	36.1798604812	28.3363492018	27.9027722581	38.5944702837	35.7615979847	33.9295903933	45.3944794067	28.4002163392	12.5793296433	41.1887611068	44.9147134056	38.7971710241	35.3259311447	58.6781636392	27.2807572427	50.2435144652	25.5770515174	34.0138020186	39.4698973239	51.8292915338	42.3116804081	32.9049467814
STK32B	1.6187529404	7.34603500967	0.420346933671	0.488337542469	2.34645349204	0.84041552686	2.23565894469	3.63343411729	0.174161195392	2.2480112942	3.75448357304	0.626194893217	0.618619861194	3.0150841122	0.106304952395	8.66781127289	5.5774002548	5.02711261376	2.66829437728	0.232683375152	1.09703473623	43.2147284781	10.1510889004	2.64998778945	0.236817151977	7.85710652639	4.42194778076	3.06214036959	1.93131230684	23.9432947245	5.18213024858	10.0684120513	1.45123589657	0.233585048357	2.00430027094	1.55059646707	4.82385000386	0.790439600338	0.0636754313025	1.85025943188	0.537326140565	0.265297640893	0.829077847323	12.9526988438	0.420572451186	1.43128593445	0.304612452693	0.806256677125	7.97411093016
OR4A16	0.0	0.0	0.0	0.0	0.0	0.0	0.0	0.0	0.0	0.0	0.0	0.0	0.0	0.0	0.0	0.0	0.0	0.0	0.0	0.34757249174	0.0	0.0	0.0	0.0	0.0	0.0	0.0	0.0204678607871	0.0	0.0	0.0	0.0	0.0	0.0	0.0	0.0	0.171815105383	0.0	0.0	0.0172078070352	0.0180025069529	2.6295511917	0.0	0.0	0.0	0.328165842722	0.0	0.0	0.0
HFE	1.63688690127	2.55520441045	0.628725252518	0.189957899619	3.34573375889	0.65146165286	1.1392378328	2.08071784869	0.486031423638	3.65426709043	2.88275927117	0.7196441364	2.99045625137	2.50471494279	2.19904578721	1.43357144079	1.61462984396	0.307354535277	0.612385440308	1.56498469893	3.00237493154	0.650035940126	1.02337369276	2.67559326744	0.747298952882	2.04508120233	2.45554013818	1.48799003586	0.337163553101	2.17552750085	0.831756090893	1.46579440912	1.62587053715	4.10594963962	0.47353996049	0.926964448821	1.40778384379	1.38537773337	1.16060635596	2.10393413167	1.57489737522	1.23200017067	1.92302501558	1.83560992233	1.06798182616	1.67619777617	1.50962220895	1.47360349507	1.05983014148
GBGT1	0.93224468765	1.14064240316	0.648216329507	0.461119107256	19.2832251406	3.50793792088	4.36816406705	11.893003775	0.730212701816	3.80333694115	1.73709736536	0.650969477061	4.40433664155	4.30127031495	1.20418631181	2.862402947	1.90035517424	1.36753775257	0.777245125901	2.2636208481	6.18900912879	0.446583941297	1.28020241031	6.22985059952	1.36341538345	4.40597502604	0.929477926996	5.42994210604	0.611647889855	5.66601741141	2.38362635461	1.40495912691	1.52351571913	1.53364127997	0.380372822763	0.827626966469	6.64786715765	2.97846002316	0.169562692905	0.676985623612	4.79504748486	0.727525013256	10.3199417065	1.06213936831	1.76834453778	19.4026688063	2.85804731987	1.96671112955	7.71964001538
METTL26	29.3952802049	16.7431037736	22.2431353765	30.6753233323	36.910922055	24.2429172458	24.6995445247	27.024585469	40.2462103602	22.3233682841	24.7126308446	15.7963707047	30.4081804001	61.8375099721	13.5461089699	30.6086920242	16.31998875	30.9133440625	27.7307786797	14.9656547939	22.8033729088	20.1785801986	9.21752268321	19.3835226081	38.6449357708	15.5854080278	30.8366073472	16.062069868	18.5076635122	18.056019944	27.4830052009	26.2718226884	21.9113891717	38.2524437697	11.3942070526	126.226373428	34.492899526	15.6516617083	22.7725511926	30.8405370064	33.3911384332	30.8827547337	58.2290092083	9.2984401692	16.4399574909	19.2737547288	46.0634386463	17.0268744047	18.2818889586
HIST2H2AC	0.950940803639	0.625650241648	1.9488479607	0.772330713665	1.68053934582	1.89592045127	3.44962634122	3.07223639366	3.25028542878	1.12030067078	0.192863647084	3.34810888333	1.23155582195	3.03723446589	0.580479555435	1.95287937133	2.51282719443	1.0932539524	1.25066572155	1.41717484773	1.70415762049	0.859896028022	1.80214385793	1.49563744688	1.07761924541	0.505941402352	7.74894733133	2.12377672429	2.43015498883	0.963274846547	0.302577936912	3.03669793492	0.442214967568	2.30763744466	1.65978282053	3.80616685812	0.821334943938	0.920121342759	5.21550763468	0.566136851457	7.15294993569	1.13176653855	4.92991572439	0.886320527528	1.20870592719	1.18020128781	1.98877632993	1.71016356534	2.22894465102
FAM210A	3.05971522958	4.42701915883	4.00059920152	3.65085371591	2.92334406411	2.13853022489	3.16547371926	2.65239100518	2.08364983071	2.37012980284	2.32190361705	4.43945112403	2.6971173981	2.19454391993	2.99850366384	7.33652454972	3.28691324749	3.03892793318	3.83368719762	4.73512140557	3.19246167432	3.84084443194	6.60644917799	5.29202362755	4.58298441388	3.31857313376	4.77829373486	4.32001289799	5.21454861001	3.02418277599	3.19151528671	3.22279032829	2.88852058286	4.68420239879	4.51314196077	2.20866292119	4.02126628935	2.89915687497	5.82998156344	2.12618796168	3.25306185189	6.96642077092	5.23547019544	3.96409442207	2.85567703339	2.99357472562	8.36011412896	3.29538033741	5.39550364578
FCN1	1.55294603376	1.27715765478	0.105965265881	0.0159135757103	3.72417162252	0.582364643736	0.131297261699	1.82328808084	0.205005287869	0.307008716243	1.00419969627	0.276092735342	16.2503767748	12.9318327822	0.210206785408	3.0859136714	0.782073952652	2.76251591886	0.126485215264	2.78551102997	0.367947010465	1.25304396776	0.88375296069	1.55895656886	0.256960001483	0.57980435936	0.779002936489	0.316349875639	0.0502613563201	0.198839928354	0.085287979005	3.3513676696	0.10041058589	1.21221406677	0.342613635454	0.115022741303	0.453942338254	16.2031771418	0.0097228897311	0.146620465445	9.72075740573	0.280021899641	6.69791943824	0.387990689215	5.0969694116	0.746099723319	3.97784303987	2.7157987958	0.122636281444
HENMT1	1.98733300678	1.120732561	2.46283719683	6.30595444283	4.068786897	0.554865424734	0.731706604047	5.45424096126	8.68916187954	2.48920887175	1.65873866299	6.74513770667	6.32602840355	5.42980022383	4.37423407782	5.92208510547	1.33306207718	5.90359592337	17.4666603372	4.43861724561	10.676050026	6.26667839053	12.0839504684	2.81761356922	4.98448368271	4.81351505071	15.8174254669	8.50206757933	7.78387461774	5.8563183356	9.42681188279	4.95148779991	4.77723407668	0.290032825804	16.041789143	15.640345047	1.58443839144	6.84453600206	0.908306667623	8.91910571422	5.61765038585	5.48734160473	6.27323089344	7.19541747307	7.11312263563	5.08750321559	5.68216485332	3.41186795394	3.68006057441
BDNF	2.99814891247	0.0427839450961	2.441305558	3.58026175792	0.064150256917	0.989601889295	2.53485139737	0.183968317922	0.319966011023	1.54832252174	0.0413012267495	1.03913968188	3.79718346359	0.147761740923	1.31620364314	0.675387985538	0.142442239219	0.0450707231963	0.236317650874	1.86645829317	0.0858684072339	1.92569308601	0.0310651073022	0.40742352447	0.039489923017	2.92244447102	1.59313581247	0.250564695776	0.212554144116	0.136786385891	4.79339745637	0.371600356378	0.0267385794343	0.283291362128	2.26061094513	0.0201877475135	0.611038741922	0.0463627033173	0.0437994827202	0.028526275461	0.0734613927134	0.451653809339	0.115456591646	0.028419720932	0.724320038593	2.38530777076	0.464608423801	2.08799039955	0.203374271007
TDP1	1.02382830335	1.66815185217	3.35996577775	1.14818531545	2.0540279725	2.88330924579	1.28130693085	3.0925934107	2.51065889071	1.92201897066	1.3800420676	2.92009585236	5.78864293289	1.68577335915	1.38606156895	3.07442292373	2.41184196793	1.68998926596	2.07900330017	3.9482158669	3.15345166061	3.20441421716	2.21876957787	1.58072329328	1.57071850536	2.20371136534	5.33852321365	4.47053973126	3.37715634009	4.56591180347	2.90702226653	3.4188889664	0.817036004796	7.03196561235	2.8980834976	0.93679966621	2.63860028656	2.28938903085	3.93146303211	2.28018503847	4.57694441585	7.45406487647	1.53946617051	2.25322897442	2.10613312842	2.0997782133	6.38076748103	2.7573538134	2.48638694073
AMH	0.0409594028847	0.101056212757	2.9787667741	2.19994757635	0.284056444931	4.62437497006	4.48538098387	0.758494018973	0.249533359273	1.47175177855	0.00726873041773	2.62572208481	0.495097817871	0.26051482596	0.492240829044	1.81995153838	0.27464317326	0.4195218456	14.1878284743	3.37410889063	1.85285296334	3.59370283068	2.42367138789	2.61407738438	0.140302185903	0.0693387029263	2.59596225505	0.983928915041	5.64739724815	8.81205061768	6.61414083199	20.9059104063	0.346660979601	0.0885525561222	8.67424187612	0.724792419424	1.40571366403	0.680948641055	6.03733385565	9.45385078583	1.31185875657	2.3818282731	0.104676531766	1.83418546811	0.0715852397653	0.560117864122	0.136279785057	6.13464162598	1.4076589199
HRH4	0.00481470262008	0.0142547667613	0.00575586684139	0.0302540155011	0.0	0.0	0.00509418648171	0.0142024109043	0.0351986259781	0.0212707032639	0.0256327775227	0.0227226118558	0.00623548281874	0.0	0.0231448023398	0.0	0.0200382212206	0.0264182265191	0.00554070828112	0.0103917984172	0.0164722284126	0.0101587135263	0.131103560807	0.0397559026909	0.0624970019394	0.0244519117326	0.0152575298842	0.0165227196812	0.0146256318642	0.00465546235443	0.0064343181786	0.00768754345576	0.00940369887412	0.0178443264284	0.0374343800604	0.0212995046012	0.0205478624758	0.00889380697125	0.0198049538239	0.0231517251141	0.0145325580937	0.00481340185426	0.0	0.0	0.0413085936714	0.00929517553713	0.00961166313912	0.0466238703747	0.0
HEMGN	0.0	0.0	0.00881893048213	0.0	0.0	0.01583893443	0.00780512782579	0.00725347301544	0.00490273259238	0.00651804006448	0.0	0.00580246033745	0.0	0.0170616403321	0.0	0.0289216584954	0.0	0.0242862292912	0.0	0.0	0.01682543409	0.0	0.0	0.0	0.0398981834993	0.0	0.0	0.0	0.00746962095209	0.00713293062492	0.0197168580444	0.0	0.00720400323105	0.0	0.0163873142453	0.054390547812	0.0	0.0408803057275	0.0101148107249	0.00709444676012	0.0	0.0	0.0	0.0	0.0	0.0	0.0	0.0142870807464	0.0
ZFP30	0.561554919735	1.05862317702	2.26880807365	1.44848608726	0.66503792884	1.92667840798	1.10342525461	7.53188964586	1.35727363622	0.569081999213	0.981088987339	1.86055871894	0.463075036048	0.3816847269	1.90247371494	1.15022993589	0.858535702704	1.0564273341	1.78834647465	0.932521282024	1.33569925938	1.53304414081	3.26225030276	2.04873698616	1.76280479357	1.11981060312	1.01929936656	2.57733268796	0.803019637316	2.63512582793	1.59586790399	0.552613149741	1.10797663191	1.1637974743	4.09114776752	0.611763422053	0.753206500484	0.880658879412	1.92336046823	1.43720140357	0.475055901192	0.41245949906	0.319826542228	2.06775007856	1.57321138572	0.506663672049	0.942589170827	1.15638574633	1.31116690803
PLA1A	1.06667746821	10.1391139297	0.393103225496	0.0719941149982	0.956066063306	4.44275637083	1.23042416992	0.276007494988	2.03081336774	2.11882478946	0.375742527697	0.536213739359	1.02829398135	4.31271313218	1.63210447211	3.41161302112	1.64668921052	2.27072935122	0.396867698879	1.38481804157	5.26824055083	2.96134342075	46.8355815194	29.6930644522	10.5839987814	1.28709888585	12.3603360609	4.81650034667	0.820213228197	1.27179958685	15.6804626216	0.614668324702	20.7786812213	0.0891730099993	0.249426532356	0.402104725677	0.0598986054643	124.075069597	0.505850779411	0.779016648463	1.8720645105	0.0240538937349	0.35663703191	0.0642181704984	0.825721643525	134.002095661	0.768514014044	3.88320518925	0.256068462743
AIFM2	5.38923775516	4.80268585135	4.28417631866	5.11251030711	1.04429372468	2.39251499985	5.14532874101	2.91837094962	2.43428550046	2.14842470408	7.41182319679	0.776386142889	7.17999271244	4.20387188622	2.66726681801	2.04951206749	1.82736610532	4.13272639084	3.71241913548	11.5464800121	11.5663079927	1.91571773332	1.27506780621	2.81496953015	9.63532973165	5.25387251419	2.84818317289	0.971731122383	1.21885012576	1.34348574685	4.81673434759	1.78467780986	3.49629707269	4.6651984612	4.28984144408	1.77502784856	2.82177172847	12.8266397539	2.87183015327	2.47071603528	4.18346358409	4.35286006423	4.70403083561	0.856742512225	1.2688133648	0.946152931159	4.28422242766	6.9039319785	1.14383064541
ARHGAP33	1.27248379672	0.785291306837	12.466822395	8.27917814159	1.2195963901	9.62738312804	2.06037568225	1.55821148219	10.4630148332	1.29639355867	0.736438469901	7.65858576783	2.81331233527	1.83261479114	4.60521137801	3.2249848588	2.97633871256	4.9814288284	5.98108293261	1.96745193067	2.21693646896	5.12531818223	17.8908850319	3.60403130022	8.00447976652	1.64715143383	6.79165060603	11.4028670445	9.16551460454	10.8690566249	7.93732108192	2.63752308416	4.06896620063	2.98955906631	8.09983195997	1.97544401571	1.07466102036	2.36916138341	10.4041020035	9.32511346202	1.83089602747	2.3563121135	0.411860361487	4.10424920395	4.14167255034	2.33671877285	6.2266985145	5.63118497182	6.56142575282
WFDC10A	0.0	0.0	0.0299044186604	0.0	0.0	0.0	0.0264666799078	0.0	0.0	0.0663067475115	0.0266348521114	0.0	0.0	0.0	0.0	0.0	0.0347026418494	0.0	0.0	0.0	0.0285269753623	0.026389632588	0.0	0.0	0.0	0.0	1.37401332389	0.0	0.0	0.0	0.0	0.159761526321	0.0	0.023177404157	0.722388093404	0.0368869607541	0.0	0.0462074843775	0.0	0.0	0.0251678107118	0.0250078725233	0.0	0.0	0.0476927672605	0.0	0.449433744403	0.0	0.0332780190604
UBE2M	55.9227683026	26.3003015874	19.1984407925	47.8623482194	48.1065964864	42.3501619099	37.6260786822	37.0816080284	37.1665474102	40.2419308201	18.7015064886	44.7230889307	51.7768475197	57.0967933487	28.437474671	35.2809799337	37.1180670203	66.0796863535	50.6806498495	50.0768563447	39.1251439993	29.2541544214	35.9711312263	51.8270844806	58.4156735133	38.9912241066	31.0439096973	12.4785426505	85.6415336278	32.6975877235	40.692849073	60.8156986366	23.5006703545	42.1905465144	49.5050560436	110.256193421	45.1558748437	24.8543774653	50.7573023962	47.1028333976	47.9874962986	36.0535944115	49.4269548454	15.1285289984	27.8416361772	26.7674149718	64.8502429099	31.0369935972	20.5302295634
BLMH	7.33694191891	8.90648133015	4.72324165235	6.77475153747	8.68503639791	7.4660881434	12.3512928057	10.2149951682	12.0667982379	8.81711183693	5.1604285676	10.6723237173	6.14285178433	8.43281307235	5.68506527741	8.05553650989	8.692338307	13.5326450728	17.1481711645	10.6649119864	7.98216708385	7.43862336704	8.9249716299	11.8107443645	12.56410374	9.61797324106	12.7967991149	7.38801148219	20.2470435356	15.8705410845	20.7746576719	6.18737040573	10.40770651	7.47787956029	9.81354649191	12.525853545	8.66963092478	6.74465243003	14.4193403628	11.4585568706	9.33304104902	7.27986144237	8.56180733812	14.2655691056	9.43079589097	9.09059102605	4.56596555136	8.71926576909	8.56462103423
SCARF2	5.26771750866	1.91020730391	7.62136181078	8.94266389602	12.2890817363	14.1615367781	8.160637971	50.6682542229	11.6199006758	6.60710065409	19.2894417505	5.87403474832	0.456927322558	17.9237691841	6.14021416539	5.60016878542	31.8487250853	8.71150548794	13.4943673459	8.12791456786	2.30794628806	10.2047039729	10.6899322819	14.0099293655	13.0181971802	4.79306862278	4.44631966791	6.94506206481	39.1931384423	12.5181507465	7.47192875395	16.2740431585	6.81911676542	1.8161206809	38.6270867734	12.9343861774	25.2103229887	2.47112600554	21.4466767886	8.00194539768	17.6008472459	8.60243059116	4.78630537044	9.41676435765	11.3186820201	31.6681523878	32.7219523915	5.32409411853	19.0157655408
TOMM7	141.706239524	69.4266570059	79.9888377243	100.505601865	84.1962340129	82.3009214742	35.0659475643	78.4738871153	62.4394495206	102.447598095	69.7183910306	39.9755583959	188.238037328	106.732662252	81.2750111987	104.925315955	39.751390679	230.69440659	79.7611885352	115.84251054	50.1948341859	59.6598908991	56.7651751795	163.261565015	47.959958961	72.9400387338	128.176344677	29.5239014446	56.1999690999	77.1014969459	67.1100929382	98.4269687188	120.734535594	94.5535902537	41.3373043459	411.023461716	86.9698430005	51.4209341854	60.0876945307	92.0303788685	108.092398007	145.923035635	221.974094103	301.463099857	64.4000529721	58.7457005005	33.5240099123	132.652436005	81.9280882777
SOX8	0.247053341843	0.102244930543	0.262001032622	0.132347665283	0.510863002647	0.0941115747473	0.147561295244	0.0156722151615	0.0344275369449	2.62299638904	0.203655656217	0.0344769834221	0.0309635617949	0.0506883163928	0.0319250658027	0.320259078064	0.447767436101	0.0699653825791	0.0183423447429	0.0344017297781	0.545308066943	0.042037636749	0.062598218512	2.90366097855	0.0	24.6525012692	5.21090546658	8.33688020166	11.4023696418	0.142558828722	0.708245378502	0.235406734576	0.0311306565616	0.00369206844198	0.0575367772951	81.9459480148	0.0765259517207	0.110410031489	0.00546364099172	0.0191607688896	0.0761735137383	0.0159346191349	0.036660404469	0.251704703471	0.246911224006	2.63480055856	0.0715930107285	0.0385867230448	11.3230562255
HLA-DOB	0.332675738625	0.328314846936	0.329528023494	4.73545359959	0.908599656097	0.459184178188	0.854825328993	0.401876759502	0.480098373944	1.29335034382	1.2043597768	0.44110565814	6.14262849225	1.87959955579	0.152305588415	1.19248138537	0.421960217794	3.62991551081	0.0546913831408	1.56940765309	2.02701202437	0.461264643665	0.268774783639	0.38261311839	2.0666056524	2.6646214184	0.572296971307	0.467533089164	0.0673713175001	0.238957014972	0.15242892839	0.212470792002	0.213491294891	0.290628181943	0.232262396844	0.0140162509647	0.25353054212	8.56823045082	0.104262031756	0.447912363639	3.28974982816	0.218556423053	2.08418411399	0.194497874839	0.62521675574	0.229377717103	0.151800130869	2.74288881848	0.202318893061
PARP2	4.32885022639	3.79553582004	11.5871445319	9.0954088594	3.24873439766	8.59551825687	5.99431530362	3.18383193692	7.41021698302	3.73723348242	3.29165415247	12.9618520906	5.83520013994	3.50517987908	4.76015201846	6.74466350702	5.37135217305	12.1269514959	11.5112543219	7.96122881989	4.16470160671	12.4813684536	18.4234381858	5.12219767401	11.1420080249	5.0888344442	13.6723460355	8.1329914322	11.4645624367	6.9372208409	6.89133070767	5.83096417436	5.36423165981	9.96336397782	20.9517373751	2.45417163009	3.38574193342	7.12820389493	14.1233625672	6.97028354956	7.13168258106	5.31477124409	3.44447890088	17.4650742533	6.07904633319	3.21718824361	4.8373135209	4.12092636473	4.77801182944
POGLUT1	1.43581935387	2.18075234694	2.00207491524	2.13772307247	1.51678433021	4.44260350918	5.36578837797	1.82285285715	4.25196444061	3.96206095839	1.20556764038	5.69971174009	2.11411422324	2.63018516253	2.9028067384	2.78046475621	2.63055511357	2.25836267096	4.42720157666	4.06575415834	5.75510926596	2.51494648748	3.06741208334	2.56328381302	3.67691135049	4.49143133555	2.47872980589	2.07796229051	3.54521029885	3.35172560674	3.78441989461	2.26473275406	4.32799907458	3.4792363292	4.32002345809	2.04756156336	1.96202988995	3.7968397576	3.04690252073	4.13295058109	2.49614892764	1.20407074436	1.17904241218	2.04121546421	4.00428393278	2.61343087296	1.92248972983	2.19764572579	2.28090177873
CENPA	0.774810207417	0.0527347296829	2.74686336366	1.02329668567	2.51391366864	4.67526525806	0.66902107769	4.95637163379	6.92509124387	0.708208226068	0.824995404129	3.43949834266	6.89728042639	5.88069055253	0.599360509205	1.43155646392	5.05321565536	5.26779703238	4.99115272511	10.0530771451	4.61098348513	2.85620196902	9.1685629272	4.12728620339	6.78199101496	1.8363077442	7.77991938507	5.5419906993	10.3434022317	2.44561321238	3.03493452606	1.16602550199	2.41779862752	6.31259919878	13.551887422	1.31327253113	7.82011441238	2.58281895279	11.2587483808	12.1963521403	10.0446090572	8.21789210052	1.52947034896	6.16438303907	2.75922981541	0.601772382984	8.23163576528	1.23324957057	4.31261646506
FBXO34	3.17484263328	8.60688078271	8.68918359442	6.90049221306	4.51231634393	8.07360269596	5.83666816726	4.5670344185	5.95234678626	5.22908305381	4.81820801367	9.83097952819	5.37345032682	2.80671207724	6.21016916115	6.21521052806	6.52663240392	6.45701086662	6.54988133145	6.64490261458	5.10201468721	12.9962268063	6.86484001966	5.46886545267	8.02401220674	5.07799885387	12.457645789	3.7441476906	5.41270819543	8.01546036224	8.50849451436	5.20566292498	6.35107574277	15.096313111	11.8415097516	0.850640268442	4.21708459922	4.48332225871	8.27863362323	4.19157697909	7.86318403317	5.12194871612	1.66423275273	4.30722182323	6.64786171007	7.79154314188	10.8590258509	7.45222497263	4.58743893915
PRODH2	0.0	94.6683401422	0.0	0.0	0.014544796442	0.00694222061982	0.0	0.0	0.0	0.0	0.0	0.0	0.0	0.0	0.0	0.0	0.0	0.0	0.0	0.0	0.0	0.00682207272323	0.0	0.0	0.0	0.0	0.0	0.00739720929949	0.0	0.00625274108973	0.0	0.0103251224444	0.0	0.0	0.0	0.0	0.00689944704883	0.0119452522777	0.0	0.00621900605775	0.013012430877	0.0	0.0	0.350946462333	0.0184938266309	0.00624216475104	0.0	0.0	0.0172056253802
SOBP	9.45687095756	2.6052361908	0.480107991476	2.77153775724	2.34740879865	0.84305848572	6.95563055596	5.13097065091	0.95372777585	0.336764773934	1.88750209651	0.406431081934	0.699006294409	9.1050590301	3.10282045103	4.94918529709	2.7218351632	0.853366879522	4.20949372892	0.176672614573	0.157526420729	3.03051905009	1.27787408479	2.56365397214	0.0996113860575	1.47837165011	9.4436242543	7.97069016483	5.70347105672	2.50059016673	7.80435451008	8.33602738654	1.19155924705	1.83209591394	0.0852358711689	19.8107770023	0.488526620853	1.92313890151	1.99218405347	1.29644026963	0.941955622348	1.33746477908	3.69876435371	1.77283945715	0.356024020723	2.98032354949	0.873219039314	1.12954024594	3.4302195406
CRHBP	0.37803059316	22.8197643054	0.173238655086	0.141394078867	1.9343671191	0.31113928205	0.746619091571	0.700044247978	0.0544355489618	0.0835043948325	0.798323391113	0.0247789690472	0.693577892696	0.786892834667	0.151436202252	1.00041285863	0.402070280664	0.656845894602	0.0870067127013	0.0747927724822	0.344888384259	0.206051908249	0.204554511542	0.0715336764972	0.122675171128	0.262381312996	0.173038424307	0.345945548574	0.210529787534	0.225408750943	0.0841993545455	13.0879344002	0.0184584913327	0.361941253929	0.034990394491	0.102199121376	0.053777780636	1.36169483573	0.0259167215933	0.12724445823	0.665604640766	0.340135616153	1.11101646746	0.134530537698	0.306319261146	0.845373499457	0.0503112099811	0.610119002977	0.176018519654
OR8H2	0.0	0.0	0.0203396142333	0.0	0.0	0.0	0.0	0.0	0.0	0.0	0.0	0.0	0.0	0.0	0.0	0.0	0.0	0.0	0.0	0.0	0.0	0.0	0.0	0.0	0.0	0.0	0.0	0.0	0.0	0.0	0.0	0.0	0.0	0.0	0.0	0.0	0.0	0.0	0.0	0.0	0.0	0.0	0.0	0.0	0.0	0.0	0.0	0.0	0.0
APOBEC3D	0.909038556608	0.417744014841	1.7255025821	1.22090703655	1.40470157857	2.18272963545	1.19675150901	2.31985732638	0.262875082157	2.71617102007	1.88411490201	1.32088164699	7.5220650568	6.66047555456	3.46919215645	1.48270944946	1.20334308181	2.56628624691	0.878414529377	2.59855392105	2.72226929052	1.77159980626	1.82413258456	1.46827374604	7.4386330087	2.36822866098	3.25452404835	2.38134914698	0.0983700651593	1.7847853649	0.315299288287	3.04692537675	2.00586624189	1.15089244516	3.48379491102	2.70142997768	0.599698853092	11.1903451891	0.0380587141459	0.840863378589	5.24327082368	0.416241053079	8.59744344376	0.475374271149	3.24142159256	0.830597893891	0.290910486554	5.54375222558	0.498503417941
EIF5	18.5282913045	24.7446325731	21.2540144144	9.94057663561	12.2084523648	15.4370947973	12.0725091948	19.4922848991	10.1818497817	25.9959716118	23.5776658929	29.8923844863	32.3673597631	9.78036415097	24.7248970431	17.5192410749	23.8288699453	19.8019719421	8.34199918298	25.5324177821	19.7801049491	18.4448793312	15.6381522576	22.5959626137	10.7229766889	30.1770481331	19.5585543057	16.9785200953	37.3183369377	24.1115246462	18.6505411512	39.4372877439	13.9228301852	26.004191767	22.2194986915	4.67871521208	19.3873902329	19.5351335523	29.1432422076	8.16155665575	47.2885852083	33.4822451505	20.2947401324	21.329956476	20.8578667942	11.062238134	20.9543749433	26.1863140641	10.4722893595
SRGAP3	0.155848392419	0.551673434155	0.168462822643	0.0552898368258	0.31590238755	0.372692035444	0.256722879089	0.934124976651	0.339263188486	0.760254769449	0.212645317924	0.354544308451	0.187334675638	0.283829637211	0.364870234195	0.26891915595	0.226564753778	0.0788570939035	0.0547711486331	0.13898124313	0.568314511704	0.931357126102	0.22772643534	0.192645121367	0.196847061964	0.652150213674	0.0887200691427	0.489992410483	0.659576529613	8.3883264149	1.00645058216	0.286091661593	0.201408307201	0.145266621869	0.0715217419925	1.99954070529	0.522735927522	0.263751852013	0.618039308327	0.989931748823	0.311727620396	0.210851622719	0.559512214024	0.717354021242	0.241982072569	0.175662313852	0.137862658485	0.248517744911	1.68720822763
PTPN2	2.25570452565	2.40493149732	3.019996298	3.32363156797	5.90863073775	2.55035679835	1.58749601167	3.50507812677	2.09270813661	4.53853926768	3.73856189752	4.95952658695	4.47785328374	4.28462384184	1.84403534543	5.2671643051	3.04082588645	4.99281502201	4.68954469098	8.19509745587	6.60276856097	2.90732077095	5.71893802931	5.22533065532	3.55235993122	4.64970854934	5.28837757959	3.73620525994	6.42583612989	3.03725565853	6.41092741926	3.19014059483	3.39395674718	4.33137828601	3.8630376321	3.00269773809	3.88500077641	6.4528508244	5.20264299575	2.00000664906	5.77135245875	3.05101103449	6.98026248833	2.19982261206	2.66605394306	3.3129155256	7.32517332856	3.98321581756	3.73749514287
GPR152	0.0	0.0	0.0	0.0	0.0	0.0	0.0130759104373	0.0	0.0	0.0109196556434	0.0	0.0	0.0	0.0	0.019802923952	0.0	0.0	0.0	0.0	0.0	0.0	0.026075690143	0.0	0.0	0.0	0.0251055597579	0.0	0.0	0.0125138366405	0.0	0.0	0.0394652335839	0.0	0.011450837883	0.0	0.0364481375681	0.0	0.0228288901123	0.0	0.0118853082881	0.0	0.0	0.0	0.0109951334606	0.0	0.0	0.0	0.023935109382	0.0
SERGEF	11.7701908558	5.76315905468	2.7792323026	3.88405577875	6.4823046933	4.76957714898	5.95459486941	4.36847558123	0.710529430938	3.48888610421	5.90114847063	2.78853121178	5.83223118914	6.18748522834	4.30697762665	8.69929131716	2.19675055846	9.44670517799	4.97346759129	3.70069093147	4.61231175723	1.62795849965	1.62669091508	5.38722565169	4.53852204908	3.40625883132	4.5012472468	1.58060746304	5.74969700222	2.72088510598	4.68382351798	3.02753110588	7.63824705117	2.42037753268	3.12550349932	14.5976091936	7.67254368465	3.33490841275	1.34142839343	1.50829720848	1.72509459831	3.16106078438	17.9707306728	2.21637652294	4.64876464796	4.37623340653	2.27520307513	5.92843680277	4.4345288529
DKKL1	0.193405384919	0.0477175308972	0.361268302091	0.141061159202	0.0679702927499	0.129768682496	0.089526579127	0.106970109234	0.120504536203	0.0640829072459	0.514831090778	0.589491843236	0.0313097207107	0.0698931672742	0.271168580825	0.236955682539	0.0	0.0530606734412	0.500779909038	0.182628210923	0.0275702184884	0.484586627701	0.164574901108	0.274481718305	0.836829580155	0.0368335163184	0.715039630037	0.483957735039	2.33779196361	1.70645478696	1.66386799805	0.0579012513259	0.0590225316056	0.0336000971969	0.375932391682	1.62206685873	0.0	0.0669866200627	0.18231582863	0.604499307511	0.0364855736397	0.0120845708429	0.0185351257822	0.365646512196	0.195896164497	0.23336552957	0.193049037067	0.163876043223	0.128647673958
SPNS3	0.289513593614	2.77926171854	0.0707945887362	0.248073909519	0.42178554913	0.105956806144	0.65440936863	0.485231400865	0.0481030402711	1.45925900391	0.399344157477	0.0724572506223	0.570941622803	0.64677220402	0.0843468802607	0.773902203107	0.136922867804	0.245504460928	0.113580391068	0.319536186054	0.682840558541	0.131889169723	0.0413465431364	0.570476466557	0.0782920092601	2.43271377449	0.0208511995586	0.0451604588605	0.0	0.0763468073743	0.0615527397741	0.136577057431	0.160640683077	0.00609658991612	0.116933622365	0.446326727813	0.112324231835	4.16896870413	0.0180438575822	0.025311632703	0.496511019818	0.019734230255	2.55260586745	0.0995174281518	0.332445597123	0.165138282531	0.0	0.369558445566	0.28886411627
EYA1	1.80019216516	0.0606806396293	0.0326692759369	0.159450950556	1.17552057634	5.42372601051	0.11926899584	0.0	1.85478624216	0.00301821816526	0.320071584522	12.6739403783	0.123870218069	0.0395024825484	0.158733650193	0.528997832166	0.355416805788	2.92393047583	1.30116407152	0.0368637491239	3.06191006966	0.194599294543	0.0751275485925	0.0105772232401	0.56533796706	0.00346961749459	0.162373171031	0.289155051484	4.21634240808	2.6555693765	0.693880854937	0.490872697411	0.246853461586	5.88380595658	3.9990054874	0.337490719069	0.97309827867	0.567896239332	1.59715013433	0.821281699406	1.10322635791	15.0191768066	0.0	1.34935170166	4.20074573065	0.517685542323	0.00681926119812	1.69693212577	1.73139675725
RCC2	11.9675910015	13.3820958826	24.4794701025	19.3111248958	25.7286996969	22.5249686189	19.4327139069	44.9439779366	27.4056287817	63.2260818111	19.5880939478	28.1626195469	33.6257977313	28.8621547401	11.1108514034	42.3133186571	32.2313023778	27.7131422077	53.4041234819	65.6286951732	31.5280048736	36.7383596267	29.711442848	57.9446232258	42.0447444514	55.2919286674	38.919328296	26.1017163597	97.4380154334	43.0465171505	63.3213634042	27.1454425884	7.99202271003	42.736391973	42.0409318435	6.18549452412	68.6427441691	38.251957695	72.6680460082	37.8664049677	53.5293592648	52.1408081065	18.5279516193	60.7842156343	24.7840793806	15.9937710472	63.6924615267	13.7608895709	21.3247901249
KCNH1	0.00435734744891	0.0193510305257	0.0	0.0195572466353	0.0392024071878	0.418664891164	0.0138308482716	0.0064266522572	0.023167316706	0.0577505104159	0.113669636558	0.46269359893	0.0	0.0176362551619	0.00349104099771	0.00854162971107	0.0513818291977	0.00717261694093	0.0325935274706	0.258628350935	1.10315566308	0.358555215237	0.273807356965	0.0179897176253	0.0777704488728	0.907296842251	0.0782464457158	0.0323986086553	0.00661816156895	0.00842646726674	0.0145577837892	0.0	0.0	0.0	0.0	0.0192762355976	0.0139469947375	0.354154772934	0.0268854813567	0.396002460864	0.0350722415249	0.0	0.0233849903003	0.00387664587103	0.189000094092	0.271293905703	0.0217465953579	0.151902019128	0.00869514487663
PSMA5	12.2949706331	12.505275551	11.8103227947	10.9509388017	14.2607231509	9.97974898617	9.08158530285	18.3780652741	27.538402293	9.52226212175	6.15308823748	15.805847219	28.4138751245	15.3206555298	8.98784972036	13.9589748088	10.6192630375	19.0519868192	16.5703922065	16.63128908	18.5954115551	12.6973873949	15.4680037547	13.327134974	27.456750504	13.7260832142	14.5680089494	7.96918519773	14.8612806717	8.90804340415	10.3656730966	14.5078342366	14.179154762	11.0689192314	10.105948477	20.4779728354	28.8330700646	14.2538141877	18.0469216335	17.2808229711	40.9320585158	22.7295260155	33.0549779403	24.7291788695	12.1266526264	7.45449369209	18.2806713156	13.2176163751	12.51058174
SAP30L	4.84711330217	6.30843595139	8.93570591601	10.3966323113	3.68992657655	18.8357100644	10.9291363042	8.81479623598	7.26990398233	8.70415692988	8.63518071684	9.4677392421	6.61266168205	4.55922390586	9.68554414406	8.17433963349	5.01244856126	8.33171183859	8.29781065513	5.21394755484	9.8747339355	11.0793561508	8.34564824031	5.78549318828	5.61361240045	5.39863750331	4.3412969176	10.8231290514	4.32033587221	12.7130111653	11.3271204107	12.3686758756	7.13088819722	8.16830052009	9.74537445581	2.68325199519	6.57461331925	10.6487901044	6.35214306189	8.63159649616	5.53439971263	5.45218267816	5.05115790487	6.61045653927	11.434713385	8.3659469526	6.81625284899	9.65337331556	7.43608789849
TRIM13	3.28945488387	4.22347098238	2.56067687905	2.00322021153	1.67392156037	1.48294767971	2.36112264991	2.50801217866	0.185934920018	3.30237145217	3.22790014285	2.31231635079	2.22206986617	2.15601909732	1.80717366547	1.4653186912	1.45241722831	2.25225320606	4.96009691175	1.53789356555	4.80818639165	1.72937010586	1.3528404697	3.47416402612	0.179684037094	2.92601259718	0.267817486607	3.09277229262	1.79707986611	5.19683961851	6.43479915981	2.32772346126	1.91673918245	2.24184589105	2.22132275542	2.40761375451	2.58383267308	2.11965397086	0.683290515788	0.184975406912	1.82742601427	1.85514464644	1.80978986814	1.32813455737	2.24196143602	3.53394981328	2.03330451284	0.520668610241	1.22123740245
SPRY1	11.8849603846	4.64416919938	5.77491072885	6.50445301624	22.0860641987	9.56810724841	5.58725437237	23.5693506566	1.67038808729	9.7058600073	12.8255785293	5.05449201338	1.18312110793	2.81373701204	0.756908428643	38.7861115247	7.76484527453	4.88055769681	5.90263411289	4.37149368964	2.10903823149	3.17334832446	2.22620304854	7.90205496274	0.896594637462	8.68153804023	25.04262565	87.1638183771	25.5531944243	36.1173377362	8.99258879875	20.6628132438	3.44231378615	4.95893516255	5.91487764478	1.70854668585	4.21731007639	2.46952944516	1.57644034162	8.57133764507	5.13371262809	1.78649476623	4.56455183873	19.1930389371	3.33482318237	61.379930548	1.93047210335	7.31447702059	6.30782626038
SMARCAD1	1.64770060272	4.4697089801	2.8393044699	4.05305085599	1.74604947656	3.88013499611	3.09007396794	2.67912707502	4.3765613589	5.21787433664	4.0152176677	6.67379631161	2.49621993104	1.60134291484	3.60397531685	4.71058363109	6.15509319199	2.41602778978	5.48887330075	1.55777222894	5.24157980156	4.93739867824	5.80681950906	4.29354617736	4.4542981755	7.04957794885	3.74693160526	9.19688130643	6.54616377072	10.0461175657	7.11434397078	4.23884302495	3.00507240752	4.75112186992	5.22005915647	0.4413931236	3.32495205732	3.88079921778	5.84179106939	6.91147903403	2.7329619208	4.01605913038	1.09383079135	5.52771321616	4.09888095955	3.34034125514	5.31095468952	2.33782853935	2.64975897309
MAGEA9B	0.0	0.0	0.0109903797888	0.0	0.0	0.0	0.00972695263661	0.0	0.0	0.0	0.0	0.0	0.0119061691719	0.0	0.0	0.0	0.0	0.0	0.0	0.0	0.0	0.0	0.0	0.0	0.0	0.0	0.0	0.0	0.0	0.0	0.0	0.014678765953	0.0	0.0	0.0	0.108452657126	0.00980863606994	0.0	0.0	0.0	0.0	0.0	0.0	0.0	0.0	0.0	0.0	0.0	0.0
MTA1	6.52058092582	2.83224712566	10.8290313578	5.21154298604	4.26242818182	11.9073384644	5.29502291896	5.95778156955	6.68238651773	5.13195442317	6.89163607134	7.9266556044	8.2379016949	3.16925480035	5.31356285563	7.57388734334	7.90994064206	6.20974408482	7.58842234472	8.38292027307	5.90092320419	7.42461667606	18.8939575695	10.3805338572	4.38228451258	6.15441209423	3.73043904316	12.0468257668	29.9398427877	17.7479110009	10.2013851719	11.7147214745	3.77311065351	16.6592233849	10.9764093972	5.36470697812	3.7841664451	6.74366593706	21.3505097514	5.25907488628	18.0643605276	17.0371319101	2.57347689122	5.0343505651	7.01843640999	5.58211452253	10.9572683827	11.6981472708	11.0152631693
RPS8	449.733589071	156.30236761	283.687894735	404.791501297	570.092801493	256.31885553	200.821283844	500.499452037	454.058772901	286.772855657	558.690319037	168.825292148	512.216357808	653.399949362	194.689264594	469.311203838	193.220921221	608.253551737	660.197309312	529.29505756	220.061997751	194.072120297	453.290503041	596.058901506	323.050925094	255.768185393	462.16514639	117.925310327	835.310032707	781.524196484	491.179324382	328.708190033	345.151811056	503.944336607	280.647296092	1218.65943765	335.066270804	300.339981507	409.80689637	274.919395812	397.933939359	593.858057526	666.256756378	187.71120861	205.503661358	278.667619146	612.087399975	267.787466607	475.497189158
HIF1AN	4.74360240513	4.22539762278	3.69128568039	2.58422643547	2.27226004217	2.81873764584	4.20590642917	2.06386109487	2.21196744523	4.94747836167	3.24052403154	7.6644960644	3.05940410947	1.96907840697	3.88468777757	2.73727637394	3.21047448647	2.5229266186	6.53259912549	5.07135257338	4.60694497039	2.604344601	1.72758997224	2.60942498376	2.20200906217	4.39511246767	2.60499591423	4.41832448023	5.92871043633	5.02371843724	5.41048393512	2.88447431596	3.17729076698	2.19936120092	2.55495145022	2.91597903116	1.53035324342	3.65278279297	3.29808086474	2.82094426844	3.17157714428	4.81825873201	2.54103819118	4.44329894959	2.94712583445	2.45750714993	2.82802827679	6.30002190846	1.41470942105
RTN3	25.5178341095	26.3929992737	45.8227699529	37.7195490182	23.6705676096	20.2750885276	19.2790753911	24.1854208834	25.5615170917	28.1209450018	21.7391161318	28.2114800126	28.6410238004	27.6687814137	36.6237299625	22.8025456164	16.0189479811	55.9897128513	27.7480660475	26.7418686603	34.9286512543	37.9698334749	24.0935701202	21.3689006554	57.5208364167	24.9495689284	35.9698936385	13.0795355211	27.6045232999	42.2277153014	22.0567405137	23.7919860526	34.3111325587	37.091345694	39.600377757	27.6608389652	24.8444978578	36.7228238066	53.9524737527	49.0433641607	23.9868268371	40.3956240737	34.6726408808	20.7631211852	31.860225992	13.571363911	26.1190772569	25.073737909	26.4513483044
MKLN1	0.943493282868	2.41849013218	4.09692393353	2.17890932575	1.34174561276	2.76040599949	2.29542033356	1.68955679779	1.94221534645	3.26309039085	1.66460586841	4.04824203678	3.07608888771	1.15292464577	7.726129694	1.63445324842	1.82257046199	1.98198487757	0.915322598663	1.44885297195	1.87669308331	2.29886528069	7.46549004766	2.72755962312	1.73706367866	2.92929421542	3.03913060912	3.76645988594	1.17613642318	5.08521235736	2.33115177734	2.00131147598	4.95642694547	4.84620479385	2.07762844129	0.774511602266	1.42071444196	2.16841483761	2.64750104678	3.25886976227	2.16207480402	2.3046275043	1.45934106421	4.08723040427	3.26827668174	1.67852479063	1.94921363882	2.84717400536	2.36438800806
COMT	18.1566541507	17.0899808755	12.4317993027	21.3093794202	40.4711634777	11.5652972283	21.9082260649	33.9508026661	17.5955458214	49.9754530355	17.6133328978	10.8641961241	35.4677239438	29.9521053542	13.5745060235	16.393319353	21.5147829056	22.8088224634	14.8737738097	22.9693230987	33.6003400574	12.3872478185	13.208661912	25.5158051632	21.2985612133	28.5798236947	14.5719875777	9.1967673497	30.8800514205	7.62596098657	13.1248349296	35.0044884876	14.7200126047	36.7550978153	18.0070969506	7.25872903472	30.1768400169	18.6441106657	16.640431	4.3645391532	26.8185962419	19.9699824478	23.2172305662	3.20894716148	26.2044719485	11.9282241163	25.5238186454	15.0606319758	13.0609210485
BIRC2	4.53588331883	12.6793571148	8.78135467727	5.61085150323	63.3778946181	10.0987466226	7.40080084881	19.5220055964	6.70508830272	16.1172117447	7.98307404158	5.91260209672	9.81083051709	5.38508964158	6.84980605146	14.5367135021	17.9047254551	7.7957831435	8.89705711886	12.5697331752	17.3359033555	8.88388464079	16.1327119516	14.4955881084	13.1977662318	19.1728367903	19.169405233	22.9877696876	8.38872715382	19.777838112	13.935676879	12.0705966963	6.38557632559	26.7834441152	9.88571602083	4.87860171099	11.4750653348	9.09859217537	3.62795406406	14.3682834631	10.1466927737	10.1094821301	5.51515285142	11.0733173024	9.26846632242	13.5641551364	7.74035800801	7.77347075157	14.2303183139
FAM72A	0.0560200767976	0.0691071695487	0.385081641718	0.121527893089	0.257252196017	0.135315496126	0.133361843088	0.298364508573	0.642238529742	0.218615373899	0.124267813843	0.436965296245	0.278112753117	0.242935568726	0.0598432531377	0.164722721105	0.22019619745	0.158813835635	0.698395806706	0.488680981976	0.271515272243	0.482644964182	0.620923141502	0.22646572166	0.267637394595	0.393562665373	0.85803540515	0.752960820028	0.37343365905	0.126390326632	0.28698113604	0.1192615782	0.100296178211	0.545009030979	0.425186476986	0.130796111963	0.219155473216	0.181092298012	0.93454113238	0.363656502522	0.49317732172	0.620721441764	0.286331681393	0.361339671485	0.102357276603	0.126176540889	0.95990610114	0.090413088308	0.192525171863
TMEM56	4.21824669603	2.14975953935	3.91046532508	4.58544932809	0.0268318286159	3.4604006075	0.679058774388	1.10260237335	4.16873086476	0.476431568312	0.0203233781039	7.05814505134	0.0617988407975	0.278668080415	6.34247630982	0.0841861731885	0.844030885186	5.01136268644	2.14160875717	0.105566183488	0.155090859569	3.58425544239	2.93602164031	0.68459965208	2.69437898823	0.46286722337	1.81961881303	0.796935875479	1.58722684024	0.0322976631755	1.34872418947	0.300950397496	5.34260441836	1.967480428	7.34326797964	0.788091262023	0.669487779136	0.564128336697	3.77845983396	4.22193382875	0.640932539151	0.188434082966	0.303651034548	5.08380836099	2.53829644377	0.564253069994	0.752550891961	4.63467726571	2.28531243566
HIST3H2A	1.12473605027	1.51893697932	0.660503405674	0.212555586001	3.79465613586	0.444852843315	0.62632880497	9.25476700369	0.275396623854	7.93285530842	5.00044796713	2.85582186459	2.2743975834	7.53018832132	0.0632365996145	1.2377823542	0.574861863753	6.95096304222	55.0432656667	5.21714724333	10.4863249009	0.645322345052	9.52682870385	6.90426769732	18.4415734348	17.6172445039	50.1076147318	5.12380306313	19.8802918397	7.30748419648	3.4544596194	6.61626924369	0.154157619979	0.109697747496	5.50113899784	35.673441567	1.51581237107	17.3136088112	6.76392650148	5.40834645805	3.01766268504	7.83157153807	14.5837683196	3.42329487651	0.507888005319	8.85700407801	7.7207751478	1.43309795979	3.41257719482
OR9Q2	0.0	0.0	0.0	0.0	0.0	0.0	0.0	0.0	0.0	0.0	0.0	0.0	0.0	0.0	0.0	0.0	0.0	0.0	0.0	0.0	0.0	0.0	0.0	0.0	0.0	0.0	0.0	0.0	0.0	0.0	0.0	0.0259888565859	0.0	0.0	0.0	0.0	0.0	0.0	0.0	0.0	0.0	0.0	0.0	0.0	0.0	0.0	0.0	0.0	0.0
CCT4	55.7080420005	44.3295777728	47.70086578	25.2417269175	43.2589074395	34.394542745	66.9243762853	96.7152666277	58.7147409303	49.1008103807	47.3826113311	40.5099527085	68.9951018053	39.149682108	45.0074207957	46.9133317013	37.4599935991	90.3962632022	46.1834833562	76.5305499957	54.8407009654	22.2058780523	105.954797542	49.1320865002	56.6819761233	48.559160377	37.935970069	34.8498526891	95.8881576281	80.2884788336	63.2392164865	43.6619218982	74.1594500611	61.0123625009	74.6502385808	43.3331070399	105.976791479	43.5504397317	93.8732137028	29.311085327	62.1896602689	117.693322154	60.8099817206	69.52719028	45.777220126	47.9614897905	76.1296296076	63.0282897051	46.5734696013
ZNF547	0.57910832893	0.576401828168	1.33136684535	1.00859154592	0.629003337497	0.579190945036	0.555117841251	0.131404144835	0.743440037195	0.717232852566	0.658779624112	0.790328273463	0.621793678525	0.852857269661	0.777253664824	0.815026602689	0.514995763993	0.700693109781	0.694911657222	0.507444797708	0.615264815591	1.30020713878	1.16634797272	0.945121932736	0.808461544053	0.769199028699	0.28756110602	0.379349542038	1.05749986267	0.559955045454	0.932665961366	0.347732066539	0.348021196449	0.192616700691	0.5277743987	0.102183497784	0.549217642544	0.393152133053	0.678667513321	1.15670898182	0.418316100463	0.484934048246	0.29599577689	0.739804843095	0.570936426009	0.219780882571	0.52369556079	0.383444745593	0.210711044454
PPP1R35	7.61759777232	6.56334135434	11.1521059587	11.8864891905	14.0381731216	15.7168131765	15.8204746377	10.3428170009	17.5315521969	7.69035377414	6.63771031381	6.44818080571	26.9952174573	12.3190505222	5.65013956496	13.5327047191	5.03623917064	13.4046481971	6.1637695628	7.915643842	8.53449236453	3.9553768433	5.82762167158	19.8251500139	15.8201305856	9.97390801605	2.86030911822	7.67565471542	8.01463268876	12.9330548345	13.4210011612	11.8540495269	8.19457491712	18.0312784448	6.64319906569	16.0377792988	11.7784779264	9.50916550447	13.1172308095	16.2829925095	23.1424274343	11.2745686311	18.5931358852	4.16958247709	9.00637931364	8.07128204509	15.2071248205	10.5174338897	12.5685498947
BCL9L	1.59061035773	2.25059939566	6.61001329171	5.33282069912	0.33006685771	4.34413864623	4.42597712675	1.54906749271	3.38325635447	2.41738231109	5.72747006959	6.47852843398	3.05393580409	0.167751612136	13.0464443349	1.88471426694	4.502208724	1.2198367557	4.96727513834	5.54827943548	5.50148305372	10.2586609074	21.73729017	3.14943641101	2.34822188003	4.25575925105	6.92208045861	5.07649278782	5.73530766515	8.38480695744	3.46239326318	3.81358545409	3.43445177534	8.55827530141	4.57510336202	0.378071970625	0.678470008468	5.20027944096	2.50937151	11.5530849744	3.43999021326	3.99315772182	0.478487724168	8.77593537181	10.8184870257	1.31396494858	4.75125348007	4.47386628986	3.87756622322
INTS5	7.4512073929	8.62687202084	6.91539453938	12.0840708441	8.39781346824	8.02808325029	7.79841327746	7.95556945828	8.09987839266	9.46701568138	8.64936214536	5.91587061704	9.55948678672	6.9630190243	9.24327547804	11.9296690861	10.299722973	9.13268681534	13.8520270765	9.45095630621	10.8823680899	8.97808237477	9.38015661503	7.97929407303	12.4563659226	10.9211095568	15.6394279473	8.46199310482	15.987894827	10.4432748723	10.07266754	10.8843071884	10.1588287755	12.532703286	11.5782885172	11.3126974902	9.17168384617	8.31203016236	8.75715371929	14.0164109982	11.5860188994	11.7488736046	9.33161486914	6.68658749161	10.5318261072	7.9502414504	11.5479465766	12.3225484297	4.32695290145
NCR2	0.0	0.0	0.0	0.0	0.0	0.015553079994	0.0153285283141	0.0	0.0	0.0128008104302	0.0	0.0	0.0	102.532760363	0.0464288405701	0.0	0.0	0.0	0.0	0.0	0.0330435514451	0.0	0.0151728359007	0.0	0.0	0.0	0.0	0.0	0.0	0.0	0.0	0.0462640022899	0.0	0.0	0.0	0.0	0.0	0.0	0.0	0.0557312733182	0.0	0.0144836406903	0.0	0.0773357459324	0.0	0.0	0.0	0.0	0.0
ZFP36L2	38.6224136926	39.1111203357	35.695923923	16.2091126838	50.1896613955	37.5336849079	31.1879603723	91.6632924577	41.851675359	95.8796286622	131.731193494	13.8459891062	26.7270271859	47.0398148659	23.2527529709	86.9508300075	26.4621915751	66.0590956319	34.3560851484	35.8946494334	69.0679289443	15.999742924	72.9568777689	67.9015758907	44.3519995878	74.9403302232	35.0384550296	44.256980871	15.7969750828	28.5943788107	44.6351576739	94.0616950595	37.7637942555	39.9341155196	50.8116611099	46.6871156335	55.0895197931	103.225094707	25.3351871041	19.5574548685	46.8537746584	43.0067610084	54.4380555856	117.831840675	39.6063527596	54.9703301847	43.8500820001	41.6112038505	51.1331168932
ZNF565	0.661201296014	0.484991423633	0.854541647324	0.842183624019	0.768712544865	0.896881164655	0.784667092962	0.619387510815	0.902628665608	1.02238418159	0.861007136836	1.4688782292	0.451301941911	0.588969723359	1.44605930234	1.22607931461	0.966863183082	0.554006182673	0.65807859874	0.737657328472	0.708187756186	0.919064183758	1.05275223038	1.23119092575	0.773215290037	0.880333153232	1.42990806505	1.62513675533	1.22140490539	0.898521899959	0.919445023572	1.44092529672	0.689331806262	0.517431296954	0.625238428816	0.421629252394	0.30982933035	0.734480413199	1.05974455842	1.15146478262	0.498937681316	0.83967743594	0.595988928104	1.25203501146	0.954000124671	0.694314106135	0.526202692452	0.791702333565	0.552736700093
RASSF6	0.0266289644307	4.95376071803	0.00318343178139	0.00717118702771	0.0	0.0114349846277	0.0	0.00261833751492	0.525622907474	0.0141171784509	0.00850612436249	0.157091639564	0.0241408710576	0.0	0.00426694486241	0.00522002792807	0.040636416858	0.00292225738456	0.0	0.0172423627537	0.00303679804068	1.18270279487	0.0	0.0329820531673	0.175708423677	0.0	8.68610501466	0.00304610654356	0.0	0.00257482447468	0.0035586669299	0.00850359149449	0.00260048005657	0.0271404886435	0.00295772242938	0.0431942305814	0.0142056618594	0.0787032182643	0.0328609336366	0.394383632951	0.302749940134	0.00532435404145	0.0285824383858	0.0165838841989	0.0279238563439	0.0154228153816	0.0	0.232078891558	0.0070851270979
DUSP23	26.5440099648	82.5175791439	4.68314070555	29.3810863072	133.128345533	46.5821909664	23.1699902585	69.606595415	8.30847372906	28.219937416	32.0925108747	26.3173015089	64.3181360868	59.7335473106	6.24279376436	81.2397818472	19.5109609706	17.7360124675	32.6158460595	28.4607803903	31.0522869558	10.7947351881	30.6243738079	23.6854584769	55.0405162021	32.2882604047	26.5238379025	18.095896222	18.6842653892	4.84344145983	8.03867057118	24.7458017	5.70698516327	48.4748805896	71.281956636	64.0480148112	54.4259577075	25.1094270561	37.3349066005	34.8534432552	76.0059951823	30.9453780243	102.673543158	7.52273703943	19.5292343378	73.3346085063	51.4945143941	14.8836053323	51.1748167001
LCE6A	0.0	0.0	0.0	0.0	0.0	0.0	0.0	0.0	0.0	0.0	0.0	0.0	0.0	0.0	0.0	0.0	0.0	0.0	0.0	0.0	0.0	0.0	0.0	0.0	0.0	0.0	0.0	0.0	0.0	0.0	0.0	0.0	0.0	0.0	0.0	0.0	0.0	0.0	0.0	0.0	0.0282937489849	0.0	0.0	0.0	0.0	0.0	0.0	0.0	0.0
RUSC2	17.6385723811	9.64689626255	53.0674066453	40.0791694335	6.36164617486	29.0360784354	22.9770188167	11.2067536785	16.4654624245	13.6323809938	18.0794394829	23.9170246283	9.11730305663	5.81556910712	22.5112055685	11.478813853	12.189666344	15.1100353074	12.933670855	3.33071953344	16.2446012721	34.4717617781	22.7534058204	13.0952179177	20.6128172018	8.01239830528	14.6461438521	17.0659164493	4.90645246743	21.2446166298	29.7235694984	13.8557837087	12.6692019906	9.91528697183	31.7433265258	1.26498515042	7.70342691223	8.56612919466	11.2891861779	14.6286892874	9.46901449662	10.1017632986	5.13763545084	9.4764485509	24.5896169042	11.1128813037	10.6287943005	18.0286514544	6.90521823876
NYAP2	0.0	0.0	0.00437293280327	0.0	0.0	0.0	0.0	0.0503536457302	0.0	0.00646403807555	0.00389482303038	0.00287719346476	0.00473731379021	0.0	0.0	0.0143410212175	0.00507457853059	0.0	0.00841893868067	0.0	0.0	0.0	0.0	0.0151019729775	0.0	0.00371539404454	0.0	0.0	0.0	0.0	0.0	0.0	0.00357215901722	0.00338923929885	0.0	0.0161819765694	0.347343144209	0.0810832244504	0.00501550473805	0.00351783461966	0.00368029709249	0.00731381855901	0.0	0.0	0.0	0.0176546726751	0.00730231574032	0.0283374244465	0.0437962993185
TENM3	0.587989932824	0.593371319205	0.554943563574	0.050268521083	3.53333448452	1.26563448016	0.452168561777	4.04850562673	1.03522687836	9.75522161669	0.713944721608	0.190098361803	0.127871104439	0.668034973564	0.0188907732493	1.59749929457	23.5964412476	0.00323438100374	0.00847935496292	6.32952787236	0.174780093374	12.0937229675	0.0169770157371	2.6922316463	0.860793986992	3.33342400614	0.0451428006464	0.372546150694	16.1035952487	4.99576795074	2.22737153191	2.28472713812	0.012952057211	0.0136542451059	0.0818408509332	1.43205991644	4.24048110266	0.0108886795629	0.00808239548575	0.948128054802	0.929642308521	6.77110685703	0.0112983222496	3.61597313774	0.0266918716636	7.93902462865	2.32409116418	0.0228326243704	3.40533769111
C11orf95	4.13598496808	5.49705474588	4.08549260758	3.16102580521	8.47795472695	3.14286745958	9.15739115392	8.75831257513	4.01762285778	3.22420089892	12.0450610794	1.43394910716	8.82108216983	4.04129390603	2.79272832519	10.1157050152	5.2558983063	2.58057926895	15.02381122	4.50830388769	3.10159395745	2.53092016318	2.11139398922	7.6093352515	3.5039754595	4.2944858044	4.47867500619	44.1429920014	10.5405594474	12.4109898899	17.9864982289	14.5161396385	5.15825767734	7.43058692863	1.62913817837	14.8249613104	6.14246704731	2.48453013427	4.70211158221	2.07589857604	4.90515045449	7.00226316836	3.13229914462	15.5878920252	4.45796675818	26.7375161739	7.69363539875	3.11095658659	14.0776091311
NKIRAS1	4.18498443426	5.51519785432	4.84499801343	3.20896406513	2.73923998283	5.19153570159	3.82533067855	3.62496125518	4.32581098113	2.2464998437	2.78300076983	5.1556622723	2.60130769846	2.22280799151	4.8888646693	5.15350977201	2.15865820172	3.17519546341	4.28937289829	5.81140605718	2.38340291764	2.49988009298	2.79592158237	2.51928565051	2.0461874738	2.36038887368	7.74018781702	3.54243684582	2.24493833454	3.16153748748	3.09199279614	3.08528809973	5.93418616858	2.86933994441	3.20808217856	6.27622131377	4.37286675831	3.86998658101	3.70230031696	3.01244140942	2.61436521718	5.50560590716	3.22026062513	3.84544741088	1.90508779421	6.77869076371	3.21797264181	3.53062849511	5.39834051322
CLDN10	0.0992740399403	26.6176363796	0.00624630756633	0.136017757265	0.0	0.0448738568349	0.0497542260753	0.0102750381059	0.034725271675	0.0323163655031	0.00556337443511	0.00821957990998	0.00676679023052	0.0	0.0502338076819	0.0409694973006	0.0289941599357	0.0745400422093	0.0661409756587	0.00563862671511	0.0297929653931	0.0220486161031	0.00547209673462	0.0862867757813	0.0169555475676	0.0106141552941	0.00551919325594	0.0537917181575	2.93099970351	0.0505214080357	0.0698256777488	0.0500554604658	0.00510248039501	0.00484119743635	0.0	0.0231143736323	0.0334480293912	0.038606489906	0.00716415883885	0.0100497665939	0.00525694507768	0.041788302962	0.0	0.16734723247	0.0199237240745	0.0756539287061	0.323349997699	0.0101193110375	0.0486567959161
JAK1	17.0872142052	26.2273928274	32.5862064031	24.2753009622	18.3297706074	21.6393643402	27.0180683743	24.7373697604	28.2029564317	29.3779653104	31.0863256266	30.2670513565	24.928289614	37.3830370984	29.5974965347	42.0012255941	26.8077331466	22.488271718	24.7309395718	27.8682765537	22.8914865077	32.5697361318	35.4337191113	20.5249870006	29.3489067228	25.0199516671	32.2067511753	30.5633050579	12.3904870971	40.2076829215	28.6411068894	46.9503895875	47.0050639177	48.9628148051	30.0367018145	8.311075462	29.377663136	42.0782015818	21.8267207611	20.4174920847	29.8691513782	56.0159400768	24.7735115813	39.4902880832	37.7194070712	34.5750630034	36.7792108277	27.4920231219	24.2901934769
LRRC41	10.4841531415	7.8111771106	11.3094021888	11.5370661306	9.226581028	7.67532750666	8.35483519701	16.6424574904	15.5272321277	11.7656954888	10.8573201929	9.08102168363	10.1681756038	8.00204809275	10.2066193735	8.70911254928	10.5874671481	10.7531329773	24.1419102556	19.4616093789	11.3711918126	10.0407799042	16.3551217509	9.92102407642	14.0399788393	6.14675032493	14.1006216824	21.1759522104	20.6707933326	19.0961764416	12.2832016262	12.129753728	14.7073216631	22.306950701	8.41515816175	4.33935703175	7.59738472223	10.4167541193	24.6706791869	15.1645209154	13.3439053922	13.0231794322	9.16610644556	14.2295705676	10.00038525	13.7194933189	15.7187615585	11.6349147979	15.4872250411
MISP3	1.08782826487	14.9411109716	8.34993871011	5.92639406452	0.66653043491	4.65523373337	1.0636592124	0.346706149852	4.02872157839	0.49053097097	0.718937342039	5.85975038978	0.310915901161	0.659359194687	0.973733493851	1.20593732708	0.353866701339	2.2887656121	0.975588331007	0.607218297485	3.63615928524	0.308671258997	1.12356976878	4.82416937218	7.23878472024	3.00997424239	0.737002212435	0.454840384722	1.11669246653	0.674634638994	0.32083030184	0.562999890229	0.622745377012	0.382318862964	8.5245430332	2.26790562019	0.472260409316	1.3303986666	1.15210873833	0.901874763366	0.717079466628	0.172505452011	1.01232967356	0.367103871852	1.38746647729	0.492446869833	0.554144636614	3.52348907898	6.07817222052
SYN1	0.610874584717	0.401911275741	7.23049517359	6.77795539302	1.59060651984	6.22126592456	6.56233451818	0.362556112412	4.23912352026	0.632142233988	0.556684179219	0.354960855072	0.0784011407824	0.1718339526	0.211642592664	1.25142727498	0.809288533949	0.138906030667	0.867651780179	0.41573670327	5.28448661828	2.45008289692	2.98559234866	4.90777884562	0.160731616393	1.03412765743	11.9056342549	1.24018397744	2.20115227826	0.335245516582	6.33235558962	1.44987692437	0.435324737472	0.0611900804046	5.13465775239	1.31468852458	0.14679331482	0.111825280049	0.0980969583605	0.121730890466	0.747505153924	0.0605207659756	2.67507090975	0.837257655753	2.57071298007	3.62833947388	3.57060256408	0.437000350135	7.78993937983
C8G	0.914060007962	2.19562386002	1.05150243973	0.464446409842	1.35768004678	0.666534533651	0.182475351708	1.27183699211	0.252165156421	0.228576971402	0.183634820221	0.542620704995	8.73325647739	0.977262099999	0.193445945598	0.608541068302	0.358887673032	0.60563784295	0.575562716093	0.61419182012	0.373692233896	0.345693878453	1.01148288079	0.925644757771	0.727565195429	0.280280038235	0.0910882480716	1.36125265936	0.227021038351	0.266816186188	1.15239643941	0.220296167154	0.168421716164	0.0159797337255	0.593832099318	4.37427482255	0.128805399641	5.73442101045	0.638477671517	0.464409135961	0.850249261489	0.155175802747	1.00491514959	0.0613751785753	0.476787947701	0.815742426582	0.0688585554576	0.76823753912	1.28484351716
PLXNC1	0.560872192988	1.14405881217	2.35105533035	2.94389594104	2.90872979631	4.01351421515	1.70280306356	3.65140579907	2.14751588586	4.44909535052	3.52234133245	2.02036891765	7.49745574223	5.31277425955	0.724131659437	7.57372146745	3.50638132711	2.69722317192	0.737945904023	2.22063913808	6.15180891164	2.93589800606	5.585933172	6.10982721815	16.6262231701	6.21577043629	1.63020233126	5.45756555399	0.784960684812	1.2988094881	1.6900540091	17.3830542902	1.34489348233	1.12707306919	2.5355270723	0.921894204747	4.01356054507	4.01883134177	1.73400613611	2.22286159336	4.34731864903	1.50358853416	3.72768618822	6.28513611853	2.42478190598	1.07763679169	0.156897495433	2.30916188908	3.36006007684
KRT18	6.62948343263	59.0457068373	1.60738573514	4.9263841276	4.25238457554	0.300472165988	3.0658580907	0.631349684487	1.88567505411	4.86842904476	1.46086121742	1.39860571023	1.13719085042	0.310974639652	0.290194681419	6.40100652744	0.784184807335	0.463732642955	1.17468525276	60.6817862995	0.876198335863	0.978450162401	5.22454302342	167.626977126	0.213709449764	3.81278401298	7.28108164871	0.985605730179	24.88403248	8.90426471943	16.0469735939	1.40200916821	0.0911089258848	11.3800334169	0.737566635597	3.01856385055	1.28816835795	0.831275228584	0.534261913656	8.64511027987	14.7812945521	0.213973512137	9.10514726747	0.77144289093	0.549326419674	5.42993652376	23.2261747781	0.898128162036	2.33628653391
ZNF431	0.314916711083	0.482215667325	0.972562287207	0.907526269119	0.541073735033	0.965937393799	0.736471139281	0.3170196798	1.05062867323	0.917568649649	0.807681346839	0.803072499937	0.506570765389	0.560716104534	0.416505992932	1.24689963462	0.898035221162	0.415529615429	1.14760881292	0.743084179287	1.23701943941	0.967677127487	1.37552837519	1.13764278096	1.6207753369	0.889787973067	1.04679553153	2.68747125405	1.52604165769	2.70426096661	1.51640106169	1.26104434886	0.682191374748	0.891572349834	1.29919443688	0.259832252705	0.661323619135	0.849495761474	1.22684952751	1.45179730377	0.813487327524	0.637159254227	0.434978690934	0.957265168472	0.810088582877	0.593496826498	0.603725619546	0.596596828273	1.15709169925
ERN1	0.807914545065	1.39571801356	1.28455223109	0.890131950919	1.15904114408	1.32979692919	0.999287699252	0.923864389046	2.51510181989	2.61123100408	1.71875700953	1.49600288623	0.829479923213	0.693667811415	1.1955960652	2.94441863976	0.884022969174	1.24873782052	1.71543470022	0.940297058839	1.41447478223	0.881477856413	2.59797664816	2.07045769768	3.46580506825	1.90871118822	2.62033657133	3.5256417728	2.35873495743	2.16910949596	0.734275103897	1.51060228906	0.801677447188	3.58774439908	0.796252419172	0.616057063065	1.0631797683	3.09889575272	1.3596339004	3.49875075542	1.26917674018	0.583426484031	1.11420093789	3.86871523273	1.08941360738	5.01817300151	1.3435024193	1.31914310361	1.42081580606
KCNQ4	5.52228319561	0.24999514454	7.00049358102	9.79686209824	0.0189920339866	3.80271876313	0.0759390610217	0.0622692364295	4.11908300282	0.07460764004	0.134861622692	2.44414111289	0.0492100786068	0.0341763051262	7.5092517197	0.0662093716834	1.44669282596	0.764467561744	0.549016239826	0.259703041581	2.53255162865	1.96421385316	2.40978948	0.117656752896	1.22849015534	0.0943424082799	0.209605316911	0.188350314434	0.243674285413	0.436805460917	0.26518066381	0.0943750254698	6.7946546487	0.0352066043542	6.4947709742	1.00856693172	0.0405406428432	0.272958866595	7.13189186478	0.621221168584	0.242123604749	0.0168831537188	0.00647377928945	0.150246671913	2.6925605637	0.0611308340967	0.109567904644	8.67960136081	0.0393162730568
KRT6A	0.00603153320029	0.0	0.0288422398555	0.0	0.0406986056178	0.0	0.0255266065778	0.0	0.116249013989	0.0	0.0128444027259	0.0	0.0	0.0	0.0193294933931	0.059117529404	0.0	0.00661899281913	0.00694102389861	0.00650907045665	0.0	0.0	0.0	0.080930689204	0.0	0.0183790189007	0.00637119986512	0.00689951454813	0.00610733352435	0.134137099067	0.0403023891378	0.0192608670736	0.0	0.0	0.0334966105732	1.26297526964	0.0	0.0222831174662	0.0	0.0	0.0546162121799	0.452242776676	0.0832371478518	0.0	0.0114996904665	0.0	0.0	0.00584072255924	0.521560209933
RER1	9.58579457583	16.5161957947	29.2147411082	12.5799715722	17.0445846144	10.3807558007	10.7463649617	25.1760821658	10.6378804321	19.7005957063	15.3579243693	17.0495983104	23.7961057015	14.2396072463	6.68301185593	17.6411444623	18.0080429633	17.2894652112	16.1522346163	20.5253740648	16.7037446036	14.2442157304	9.05446914057	16.0884998754	18.3681225479	16.4943152636	20.0807860225	13.3507097703	15.6293136022	14.8948225421	13.7641858133	20.3692858067	7.94891311497	23.2495550781	8.46873421677	17.9334667777	30.3544246204	17.0994323817	15.3603291724	28.3635457894	32.0869110919	24.1705240536	29.1877716256	23.8262088425	15.0457900621	12.503188715	25.0958278294	8.93696440579	12.8308252974
HIST2H2AA4	0.0	0.0	0.0	0.0	0.0	0.0	0.0	0.0	0.0	0.0553339996963	0.0	0.0	0.0	0.0362106090027	0.0	0.0	0.0	0.0	0.0	0.0	0.0357092989464	0.0	0.0	0.0	0.0	0.0	0.033076016321	0.0	0.0317061570201	0.0302770140356	0.0	0.0	0.0305786945659	0.0	0.0	0.0	0.0	0.0	0.0	0.0	0.0	0.0	0.14404158919	0.0	0.0	0.0	0.0625098943161	0.0	0.0
NR6A1	0.0669327468672	0.552907799579	0.180778171537	0.295966149397	0.0920003291507	0.0904846930703	0.0655722768632	0.141375524304	0.472846673794	0.181800617194	0.295630407939	0.306134353947	0.0802630228072	0.252274697645	0.123140051678	0.228397471265	0.498667805464	0.0544087899338	0.199695712838	0.176567216115	0.132872276315	0.643352867681	0.347897536924	0.176549356468	0.249382688676	0.261867480979	0.484440137975	0.0765648543117	1.32535652882	0.105468048892	0.920985399212	0.554141958928	0.0266297334484	0.234285686153	0.0633294705907	0.78594494285	0.261846799431	0.146535582125	0.754589868938	0.257479421494	0.224475392003	0.959110183402	0.045614517857	0.939546810037	0.160698650382	0.0478589330014	0.569117314057	0.170440220578	0.425429857932
PLEKHG3	6.0276438489	6.05984696989	15.2006595591	4.98354507431	2.05112771084	6.09050516085	2.29371670309	1.0162280131	1.99068232484	1.02193673998	2.63037838069	6.77992497466	0.860331187125	1.25863333942	9.59673804069	1.24698972451	1.02649307369	3.78170235974	1.98967160025	1.14575379855	0.390625550288	11.2740720349	3.08572040265	3.66704307268	1.08107394415	2.01368617227	3.71531143933	1.4773928764	4.8737075338	6.87350755513	5.005568913	0.939930313191	5.78644411466	3.32348407246	12.9486117819	4.07797584847	0.952402914693	6.89153397732	3.92805234955	6.57688453129	1.04880247497	0.195678728479	1.029988069	4.68063293012	7.14697941546	1.1508036067	1.32319432714	10.7477533893	3.70463984682
SLC1A4	2.72323854376	1.24832506062	13.1044274112	7.84316276883	5.24644264585	9.73780153961	8.49853902625	11.9969621312	32.3528335075	11.720568873	3.38470280772	8.77026451934	2.59733964138	6.16009307083	4.81631140002	8.95539836692	6.24594541615	17.7130085603	9.33132887574	6.36658569428	7.45927577991	6.84670061222	30.4636412019	7.89647105342	18.871996041	8.09132400335	6.37959563563	5.30737028133	5.91179323405	3.55108926745	5.42494900291	5.09586084194	6.52424806236	2.49728763909	29.6255435638	3.35895141831	10.6689364288	10.8130441176	12.9187779438	7.9572455862	2.65541258308	2.40699781948	5.90066089881	13.4137712664	17.4639380567	4.90366255404	12.6155939068	8.69006590489	8.23095521273
ZNF280C	0.358237148421	0.402435177631	0.824636608315	0.33526202072	0.432877184655	0.810082540682	0.758064197412	1.07921159838	0.623076583779	0.666730515115	0.697954976607	1.95746262435	0.449143146116	0.484787695841	1.03202976637	1.03842734256	1.03625653184	0.342942101835	1.06133857358	0.719734074662	1.51245911153	1.1739912683	1.51270292598	0.668703891939	1.5376591167	1.05676582392	0.285821320147	2.38026998574	1.86386224561	1.52190017983	1.53300060484	1.69771616776	0.535925605926	2.26698420133	0.918555996529	0.18545369263	0.471669664929	1.05597164341	1.54674096571	1.07754143933	0.4716276104	1.03251105274	0.140249385073	2.28526517309	0.708444461454	0.485595696036	1.06512327475	0.594165589168	0.496857916002
HPGDS	4.37534447042	0.668751814768	0.390046548268	0.42054658023	16.7373642181	0.314340197985	2.17746428218	22.4154994018	0.928518562277	0.0739184647767	8.68503100469	0.440882535863	7.12913886512	10.6612540939	0.871338034716	2.00073210645	2.80862897454	3.24077928658	0.962734153251	0.496551732041	6.4016911087	0.69723134437	0.788541841152	2.45228570014	0.208135838924	4.98794906509	1.65251600632	2.9474883031	0.11012294802	0.347834270199	0.122980516281	2.96538886113	1.58493531247	6.19338447208	0.278762887044	0.493457021172	4.2040576212	1.23628551286	0.103237191794	0.917189972517	3.98128298128	2.66798815844	2.93760232014	1.27274268939	0.422683080378	0.936756430351	1.63668729448	3.46731409743	2.20363227305
PUS10	0.380859275875	0.883856401275	0.711937008253	0.354317187945	0.783949510069	0.51790272424	0.928046122817	0.692232177713	1.03549480233	1.10132812361	0.545619349252	0.651797324165	0.514173463392	0.306969036716	1.31671973397	0.647046034023	0.605216613846	0.719387886124	0.377193981502	0.675058070645	1.08189234518	1.28330668932	2.97584507273	0.924388390656	1.91257217341	1.41609007424	0.399869194305	1.24891403429	0.588986104424	1.27887637955	0.780430402171	0.394350582322	0.815996720967	0.60097666986	0.805032434665	0.789673124537	0.504860793036	0.729113156314	0.712108586713	0.581601836682	0.62936303127	0.394602067474	0.385792738947	0.807062340361	0.875774100576	0.630558175092	0.668155686469	0.952201906727	0.371560326265
PRCC	15.8074563064	11.3872869479	15.1045995688	13.9853089923	20.4459174151	20.0530047731	25.1944624262	30.21511522	20.7171410373	10.7383250326	14.515125591	24.3296964203	24.1355989519	18.6628844145	13.0814558043	45.3724217573	19.1026554678	18.7529536571	42.8926891053	19.6848741126	15.5266604836	16.0459501432	25.3752900982	13.6400005292	17.5500648684	15.3529053855	18.9999974416	25.5571186388	25.9136242808	17.1219609879	20.0965371516	19.5147654362	19.1733774388	29.3367372496	31.5100887015	31.4433504601	25.6353741717	14.5165288944	57.4542867487	32.7278917926	25.9130793345	28.3872834955	22.8873249176	13.0194263911	15.4667365592	15.706968616	18.3401108332	16.9767454223	24.1920181504
ATL3	22.8654788725	8.92080809778	33.732805946	21.7166667132	13.8294718702	24.3301475806	18.982968462	19.0053323909	17.9439277471	19.9056055039	16.188936471	28.4840456982	20.6778685497	8.66624693619	36.40437433	17.683135829	19.8772896958	37.3608422613	24.5297099718	24.9842653044	15.2693338182	44.2144960303	16.8456769945	13.7861857624	9.60189684095	14.1213934211	14.3446156593	16.368756921	7.37879036132	16.0404273954	12.1017638383	20.350728031	37.7559648139	23.4166681597	46.261879734	9.04280930758	27.5644330001	13.7829994776	23.7146289109	28.6293915948	23.6390847736	18.940232156	17.4059098264	12.7205549061	29.5463847094	20.6856157297	16.0412890794	40.2045952921	14.3778819809
EPPIN	0.00566217672665	0.0	0.0270760109961	0.0457447698312	0.0	0.00911792458131	0.0	0.0	0.0	0.0	0.0	0.00668054987874	0.0	0.0	0.00453645051739	0.0	0.00785510264369	0.0	0.0	0.0	0.0452004848478	0.167255613017	0.0266850244737	0.0	0.0	0.00287558872187	0.212327027502	0.00323850250031	0.0028666676113	0.0	0.00378343685141	0.0632848239083	0.00276472967861	0.00262315603316	0.679219761584	0.0	0.0	0.0	0.0	0.00544536888224	0.0	0.0254729115122	0.0	0.0	0.129545727551	0.00273282333041	0.593433142257	0.0109661017335	0.0
BRI3BP	0.491450196139	4.40701867288	1.70856430971	1.86479052706	1.41308889036	3.60190663351	1.57679784061	2.11313701094	3.44451920921	3.19453967381	1.80178684736	3.38710243195	1.1009266416	1.1827273825	0.749174877502	0.984210825269	0.939758816508	1.41388377295	3.21908150238	2.2791145978	3.15066883123	3.72453461596	4.84649318435	2.78301784064	4.27294421418	3.76135136751	1.95864944301	4.39103039599	2.46123336218	2.36570596851	0.614167671583	1.04342444515	1.1362689645	1.93218248464	3.10108476601	0.920564930612	3.66474279907	1.83526007897	6.48716307084	5.71501866746	1.65176250843	2.01572932056	1.51122333978	2.85501673045	1.33205439823	1.11033444463	1.37882835477	2.00650959833	1.21217487058
S100A12	0.272746397072	1.07668436511	0.0407577597958	0.0	1.07356321846	0.256205466388	0.0	0.03352280772	0.0	0.210867404248	0.0363015551943	0.0536335523084	0.52984751303	0.197131114648	0.0546300739913	0.400994886706	0.0	0.2993113664	0.0	0.22075550151	0.116641184975	0.0719346741589	0.0357059593881	0.527840194511	0.0368788615048	0.173145969566	0.25209288115	0.0	0.0	0.0659314128033	0.227809643621	0.163308355574	0.166470885474	0.315892805692	0.0378679829183	0.0	0.145501080234	0.0	0.0	0.0	0.34302074059	0.0	1.93427276913	0.242657076684	1.04003378181	0.131639783283	0.748670626134	0.26411792515	0.0
MPP1	9.10508448173	13.0683911668	3.86958522218	3.91333111403	17.8807166665	10.8815152661	9.2076873098	9.89562718251	3.05826934907	11.6510884186	3.71135636658	5.85402868214	13.8349509259	12.1151463884	6.46625286838	6.96747193992	4.18171979228	6.26738642519	5.71734556825	10.9597306145	9.21530210001	3.14891503219	3.46194288967	3.52670811058	4.89972171222	7.19710935839	6.18832895424	6.09872078102	3.80777078774	3.54752788397	1.97696214673	7.86991318568	9.21128204683	8.56068332586	7.36857893114	9.51727337742	11.6141194913	14.4310358113	4.26317902734	5.16195943137	13.06292398	4.47278498665	30.7433227894	2.60896830261	7.67521223753	4.103875123	6.86033347183	6.18650718968	10.1143839555
XRCC4	2.10524851201	3.06763006855	3.39251996148	1.64692187821	3.4585906227	1.31779224192	2.83494142827	3.77016336539	2.71498161076	3.02054160674	2.9232247854	3.03153833631	4.15383818231	2.88483264369	2.10440107891	3.80345747921	3.44246057353	2.44789944296	2.16447893233	3.47555173728	6.10372801767	2.31147935784	2.34306348298	2.40452643067	1.86320938629	3.68679273015	6.69930237297	2.32516734225	1.57037894299	2.83327681118	3.38670193063	3.62484336029	1.70143696042	4.01131922708	3.63577919104	1.59600891777	2.8939545011	4.03514282296	2.18078494281	2.45622154164	2.94149257945	3.10093881191	2.24653205024	1.73208276756	2.77446792143	2.5035909232	2.68764514217	7.54747074242	2.01931417602
OR1I1	0.0	0.0	0.0	0.0	0.0	0.0	0.0	0.0	0.0	0.0	0.0	0.0	0.0	0.0164434649578	0.0	0.0	0.0	0.0	0.0	0.0	0.0	0.0	0.0	0.0	0.0	0.0	0.0	0.0	0.0	0.0	0.0	0.0227036307534	0.0	0.0	0.0	0.0	0.0	0.0	0.0	0.0	0.0	0.0	0.0	0.0126506004149	0.0	0.0	0.0	0.0137694328933	0.0
PTPRB	1.30187545823	6.95858728497	2.44778627439	1.5905431794	1.92709101039	4.39626169832	2.23449613464	0.365399065196	1.1041404221	7.50808023909	3.78359961204	1.82641756096	0.537899796099	0.325820778902	1.46142773511	2.74011334253	2.17673526119	2.04705757507	0.356377807981	1.50848580662	0.547058012603	2.72253103357	1.1472362564	4.03870707046	1.57901986053	2.71498881213	1.07500919721	3.26740360748	0.889071864969	0.957030138329	1.85504286807	3.03463954094	1.4385822769	0.857433260155	1.34754501008	0.342047800154	0.440545493242	2.13564879246	1.53361870322	0.780180339926	1.31473514057	0.257390888207	0.70390396742	4.851264287	4.29976763683	2.05149676017	0.303049618298	1.78284140081	1.00975972428
OR4D11	0.0	0.0	0.0	0.0	0.0	0.0	0.0	0.0	0.0	0.0	0.0	0.0	0.0	0.0	0.0	0.0	0.0	0.0	0.0	0.0	0.0	0.0	0.0	0.0	0.0	0.0	0.0	0.0	0.0	0.0	0.0	0.0301259715766	0.0	0.0	0.0	0.0556457142999	0.0	0.0	0.0	0.0	0.0	0.0	0.0	0.0	0.0	0.0	0.0	0.0	0.0
SYS1-DBNDD2	0.214140939071	0.335647903228	0.451765754084	0.52014464311	0.0566645350685	0.27045940817	0.213243663508	0.284872133506	0.401842230853	0.144689331588	0.415784859708	0.257609373213	0.114195618298	0.043700677912	0.363317268113	0.172849198668	0.174750821296	0.124410626797	0.202943260807	0.679691808026	0.158017468376	0.146178235862	0.0791541524808	0.351040083711	0.163508561422	0.26868500099	0.572153743094	0.15850182922	0.280606274112	0.0730794689703	0.353511170229	0.54304105113	0.713473792181	0.210084487894	0.307805658585	0.0	0.37631021179	0.255953868528	0.120901567851	0.230169761291	0.228125919063	0.226676208292	0.0579454039253	0.246551359298	0.156107067731	0.0851151665804	0.0754399009863	0.548911272757	0.268123040875
CRYZL1	5.58943558465	3.57210562584	3.51704430012	4.47592902539	3.11884279671	3.15526343518	2.45630670619	3.35376778015	2.72099515866	2.70553428141	3.12337946188	1.69562601523	2.96588514397	2.24164597665	4.10479957607	3.45799934598	2.3441053102	8.25793130721	3.36254346294	3.8814418549	3.28005259404	3.39925980966	3.54223695601	2.38142491124	3.37097989037	1.66108007766	1.21104163109	4.03577704202	4.07902250867	3.31738434503	3.201830058	2.98549987774	6.35187356281	2.30733178382	2.01332362088	3.14934743992	5.03317845541	3.46452152901	3.42622388037	3.50845372734	2.86504783311	2.39237527071	2.61284960103	1.7703713482	3.67400309929	2.41483453832	3.12774130744	4.30240275303	1.86371991481
PID1	6.70399536318	2.93761758824	0.765674015474	3.27995257709	4.42796957673	3.06029965827	1.30531714135	3.77338862237	0.307035814715	0.556629771024	2.70548023362	4.68266828605	3.33149761587	2.82907761609	9.488873589	4.15760017493	5.44041280137	10.4564345775	0.682679824967	0.52122097602	24.9595261479	1.58951252504	0.511325471926	1.67975779696	0.511085767941	1.26375969677	0.166363316335	8.75570546798	2.20073152187	3.93910792832	0.266599585317	14.9036512799	14.8470651893	1.63924326749	3.04963339011	2.36887974241	3.19827723763	19.0653399186	0.086378799793	8.98683349222	2.36103092748	1.62699850786	3.14750568912	20.8030474482	2.92269897631	10.8496969361	0.335368184488	2.77062765491	8.82083159327
GABARAPL1	18.5766262718	92.714882254	7.23902102875	7.87611389351	12.9392481203	10.6999328454	15.7678710963	4.53882079738	2.47899006265	32.6633918824	14.0134131237	5.39869089477	10.9488851971	6.43772518822	18.3807870977	11.073746295	14.186772916	9.83249925353	6.25715467761	14.5714479002	12.2240114103	9.34745845439	2.9966090968	42.938150592	13.1796530792	21.5070685433	22.0151244725	8.30122032898	9.93021939233	0.823303591645	16.1094981771	15.3204500388	9.54755751564	11.5135428506	3.51410432967	8.10711481642	16.5920016705	16.8781035521	1.20896495413	8.18861672078	9.49304442815	11.8611127543	35.8877187047	44.7443377246	15.8878777843	38.6798824744	5.91044360501	16.0929488711	8.97566650853
THUMPD1	7.17927758555	11.3533823659	10.0131058075	9.35868636931	4.73510532667	5.85680060851	8.82532792928	6.08041321158	5.78098030243	9.07997030445	6.88355051473	8.81424036619	5.89311415645	5.52682553653	13.7935143379	9.98056218017	8.88680681934	9.10407365491	17.6452059639	5.4907511826	9.10494553859	10.8339806908	19.0732231427	6.64043420403	7.05679767048	9.47271670465	6.56877212425	14.2626461225	5.24317221741	12.8239446471	19.0588446923	8.97659291643	25.2158929513	8.8018331599	7.20754437329	3.91758068106	9.52480588723	6.02221817209	8.16989868652	11.4339186575	6.30899482472	5.40207371686	4.20662542131	17.9769006946	11.1718996038	7.56283739619	9.32625035175	13.0848335636	5.29221147502
WNT9B	0.00533061551779	0.131518473892	0.0573536601774	0.0334958433016	0.0359690664802	0.0915627142178	0.0620405180091	0.0209656678527	0.0389702867756	0.0376798983746	0.0283794228655	0.452833602526	0.0414218248943	0.0123288762315	0.0	0.0835960765927	0.295805193428	0.0116996142315	0.0122688306521	0.0172579761217	0.00607909586652	0.0674835397784	0.0781586530281	0.0	0.0115322971684	0.0920448782372	0.0168924297058	0.0243909189217	0.00539760717154	0.0	0.00712377877425	0.0595790418865	0.0104113394115	0.0	0.0296040071713	0.102187903954	0.0454992813531	0.02954043221	0.0	0.0307590200007	0.0536325818368	0.0	0.00817380584599	0.00948508645654	0.172776514537	0.0411647496169	0.0	0.0412958301321	0.0141830856967
IVD	10.2615352339	37.4561070517	15.0111209892	12.0821376743	5.62416977679	5.94633553445	11.5207557612	5.84497579417	6.51264949025	16.6360276785	5.58110433802	1.5755851409	5.06938549178	6.24906538674	10.647086167	4.6049451577	5.46029310456	10.9702678376	9.60636857603	1.61617041123	10.0345699054	6.75030886226	14.2376870866	7.8096433175	7.46819243268	12.6331518719	16.1192039251	5.95879800341	24.692481365	19.3006162566	8.44624565849	5.40823212503	5.87638913125	13.8860926411	8.28101432547	8.68604643549	8.95539883813	7.43530975542	10.6081310848	2.74272636593	5.95364922388	8.8237252219	5.73264799569	2.12604445313	7.03005843986	4.52473721957	6.01713946726	8.20658621974	4.40180629159
URB1	2.05711015583	1.84765955978	5.36424893117	5.1856982249	1.57521820637	7.60452518498	1.88631844946	2.35449974487	4.30529135653	3.23084703959	2.78264834498	5.01538527337	1.3430493333	1.25982967617	4.45179095406	3.8573205309	4.21766237958	3.22302271331	3.40642996512	3.30419294444	1.99977059256	12.2083077707	8.11415356863	4.59956472925	5.07042032016	2.83288017007	2.68730439417	5.61934125879	4.49514241719	5.77203890924	2.97355886835	2.70390912014	3.2984969154	4.6672590121	6.08270624283	1.3042683469	2.98887224681	3.27904210226	6.37644516619	5.86537734421	1.91932390375	2.60959037208	1.87368434542	6.25685163986	7.03476431646	3.09235186049	5.1679063836	2.92761618987	1.73014340367
ERCC6L2	0.837637330209	1.03710955822	2.13531761922	1.30628842896	0.5256850806	1.37908433135	1.22199258714	0.761555809228	1.12133242524	2.22335560024	1.04447625721	2.24495688274	0.941206135734	0.802943670339	1.97093612578	1.36778043997	1.54782096264	1.09520289993	1.27609705215	1.23534511373	1.29571770744	2.85261425448	5.06165776335	1.59178763243	0.895003513895	2.29422423878	1.74078511554	2.70475899684	1.11591461296	3.92265156572	5.20719325895	1.81412361452	1.98586644245	1.15231909845	2.46142620576	0.784888390574	0.977430773871	0.835100294841	1.83623093577	1.85722637901	1.36284472989	1.77033126019	0.544107641393	3.67757793355	1.88651800018	1.14285763553	1.45081889953	1.63714460322	1.88371847073
DNAH1	0.179505941369	0.478689700766	0.843161465118	0.417126802534	0.376544250246	0.459219486468	0.568430714987	0.369277699517	0.553351409624	1.21260918193	0.658797860227	0.344473397957	0.351188217889	0.294446128569	0.554870163284	0.439228924347	0.833623900574	0.120149606675	0.682718149972	0.711673385083	0.457332327769	0.554688313924	0.801319771105	1.24174862368	3.20590878057	1.22586148211	0.525811377104	1.18979621638	0.687085587811	1.60766753939	0.569951087911	0.601685494603	0.450057015003	0.317309222396	0.513297887836	0.426151824133	0.245852982277	0.700800189102	0.448617230173	0.513000304413	0.595612786807	0.570191031188	0.380663542367	0.406619406847	0.491522236981	0.349008646883	0.637914552982	0.447512524669	0.970460155325
RHOG	37.6198707535	14.8467795439	17.0724695322	17.7302112886	148.76742651	25.0767929498	49.817450363	65.2885838794	30.2781374718	66.8388138891	56.2648845171	25.0694419719	127.873880474	123.774445318	18.9608662868	56.7467771406	37.1488080941	41.501486127	47.7175995555	53.4003263621	76.4801806101	20.743021282	15.6517934569	39.4941763315	47.8010061206	74.4292921288	19.2934519175	16.664766856	22.9398850003	19.3281525492	19.8927164853	54.6235596151	31.5990139704	62.1840128798	26.8806578004	23.2947574086	63.7701758859	57.0985002829	11.7948910032	12.9429940114	92.37213608	22.9760039312	122.147914285	24.4850454272	31.7815822558	43.5176228691	31.7735477628	33.9729462476	31.5893930248
RPL27	353.93879924	129.589273152	213.897125755	316.584767866	425.941240907	145.319588785	222.122904414	238.084804726	177.070947639	231.605890806	263.509477258	219.809701799	366.038328602	470.540528108	183.157272956	422.983366767	159.44390866	570.478563317	337.912778534	322.349268097	146.417925468	194.633179196	235.687635895	340.494442236	209.155131913	225.782310129	401.070566173	100.719726361	175.045029317	343.690854861	294.827102869	317.428291998	283.773666434	153.811294297	183.317895993	1367.16378437	372.560363582	247.921217026	300.773382659	215.143180984	360.842107193	368.849530093	586.667031271	128.06945851	178.559837395	222.406518435	499.546863958	259.242563765	249.971733011
ATAD1	6.76160226332	10.2123921073	6.02083891548	3.92964254549	5.48752464143	6.80615610986	9.39252169134	6.83009178945	6.28899547227	14.3569615269	8.45762473675	7.02916022947	5.21802726108	5.44526948454	8.10918597424	3.02670550069	4.77236319297	6.67050261286	9.99921683679	10.0351753575	11.3876510352	10.0637986228	4.86574910631	7.68766724238	6.9558904142	13.7853305721	4.41428714681	8.76327399961	2.82333097443	9.92153908365	14.7559144509	3.52265179544	7.30427067212	7.96364079885	7.92057402809	13.8048813636	6.01677261547	8.57571514678	8.04294535645	4.29379104036	5.34421845836	8.06991757082	4.77250407729	10.8530017769	6.05375297965	11.0890215074	6.6795652612	11.3099627146	4.46052866811
SF1	31.5236284969	24.4126168051	46.1279563637	42.7306458576	19.062758006	25.2926963083	30.528163007	34.4708430508	35.7577961127	38.0254096982	38.7923330337	30.9897844454	31.2361019735	25.9798871532	34.0793598344	39.4538591494	32.3645368276	38.6082969462	42.9028917804	38.1841342974	29.6097775684	41.6204364333	44.5698980383	28.3493670282	35.9321517355	31.8389112422	34.7389224571	31.8282878128	64.0611753406	48.8010914902	133.884353155	40.1154451149	48.7790803199	48.0266241269	35.7594109438	30.3680242887	25.6069719273	43.8808462383	56.04449962	51.5068880613	43.992743122	55.3879569921	27.2974730378	27.9196632837	40.0337576552	21.463335432	37.7527522809	42.9860436694	26.2560004089
TMEM130	0.45069251041	1.42779591619	0.0316936815397	0.0271981198758	0.00851851578019	1.65887957135	0.69724915861	0.863958168681	0.0226537157271	0.224207718264	0.282284879122	0.217467204266	0.00490494337962	0.0394177678099	0.0424809453769	0.0074242387345	0.0	0.037405897227	0.00435842118274	0.167574713742	0.107977935909	0.0639282199688	0.257821070683	3.09990747102	0.00819354503945	0.580876322004	0.0720110910768	0.194956044791	2.20508400635	1.98484234752	0.992024769355	0.0423301234763	0.0147942386748	0.0526375101915	0.235572474479	3.40117870986	0.0525307888858	0.00699602915945	0.0	0.0254961910371	0.118126250319	0.00757261762875	0.0638811937477	1.09846169916	0.0613777174202	0.0694616527486	0.0226821233504	0.733503566522	0.0100768953278
ZBTB8A	1.49020728461	0.748885337201	2.73045306154	2.56562603822	1.35868340044	2.98255754384	1.18055233621	2.07886894642	5.26222104206	0.626373055503	3.22661563068	2.26184250673	1.18642157023	1.76083362845	2.50785628429	1.61964149081	1.84572928942	2.99403380848	2.25495471526	1.49774677218	1.34077187411	3.43917897851	3.68606623574	1.91427059621	1.99807847237	1.52630803012	1.94327089076	7.20125591822	2.28994189947	4.86099493073	4.54008037126	2.92540855074	3.81248680732	1.85026118274	3.8011319255	1.95086402473	2.2158117864	1.1296831905	3.980477533	3.15436249957	1.05229551348	1.28767037862	0.620060867898	3.06912327611	3.02920864044	3.12032802204	2.68590216714	2.52838316516	2.71637063343
WASF1	2.29150897424	4.22355038238	2.46096853932	7.35272804705	10.1558751152	19.1743856682	8.60334340442	2.13597870368	41.7316597874	1.23971922387	6.86411185672	19.9673766762	4.34984221076	2.36177588068	8.35062575185	1.51857337617	6.4406612975	5.74872926756	50.0040900241	2.28585775894	5.06590079041	13.4246651369	16.3340744683	8.07962503054	15.8451499085	3.79667683695	5.57929490029	0.694048835231	22.4131796556	11.0681246904	12.2493944177	7.60305593829	9.04641600831	7.31326729046	0.53551832776	2.84387152395	7.92998740171	2.44168284933	17.1212408275	26.2315863229	3.00864964666	7.32218233679	1.48689802437	6.44386660163	7.80322431894	5.38612653164	20.7099498328	5.48721193052	3.68989941896
NDUFA4	90.2335549562	70.0240910924	68.3485166868	61.2858893064	45.3628764106	65.4615053451	47.4913757657	42.0789104825	302.518559318	49.3576787573	23.3307522683	29.7900598158	63.2060452396	41.4600882802	66.6953624192	34.619225219	26.532550865	164.275688299	15.0424558241	50.5030356674	36.0096748041	89.5664575307	52.9176375595	71.4104054436	112.051629334	39.7852627502	48.7618240835	17.5657759903	56.1058815929	30.1235174076	27.5965373484	38.6967935464	88.6423384497	28.1985319652	79.1409534817	55.1236210458	65.7999993415	37.392925946	105.139873497	122.236842852	55.7088640799	46.9838429043	86.5092073121	18.7917127185	106.685099145	17.9438240419	14.5047565008	104.124722591	49.6908016973
TMEM127	13.682802575	20.7684182898	32.7016912268	20.2701618756	18.9313523948	23.9796566579	33.0011273422	21.7967012214	17.4167607937	33.2792944384	18.6299558451	28.3167045282	17.0307792355	19.6016381076	33.4140424479	20.5910171045	16.4962744274	21.9616248124	16.5025214279	18.1874980702	26.2355159353	17.0801975034	18.1732397739	18.5315487352	29.1754367085	25.2432519437	14.6291474655	12.653477783	7.04112726656	13.8176170001	18.7007136727	22.2899447132	20.120329572	23.4384821256	21.8399710712	10.2050062446	22.1864923838	19.4648683217	13.0829445031	18.7980197529	20.3024424356	20.0070442878	22.8479325303	24.1738966274	27.6952281504	21.387505459	25.7315348032	21.4958991887	12.9740684155
ADGRB1	0.0984330475296	0.0687107146065	1.29441902229	0.0107756281421	0.0701990087111	0.1082499442	0.0736648728158	0.0118031636752	0.028720575431	0.479410884808	0.0409009365757	0.143518602996	0.177228086706	0.0527505282862	0.0384697910923	0.0611813387502	0.146547426102	0.0105385595293	0.223788574767	0.11658987539	0.0492823277466	0.0633193332217	1.12140788275	17.085728812	0.0207756935938	14.7166071191	0.00253600777665	0.296600338291	3.84823782781	4.23888074806	4.38910769171	0.168666124716	0.0750250515939	0.685138686669	0.0559989013302	15.8710110131	0.0409839910611	0.155218452823	0.0164592556249	0.00692663358227	0.1594235057	0.0120007871135	0.08835177412	0.0128156979733	0.162496441796	0.0278097095189	0.0479276514332	0.137166463235	0.0958168085508
FAM129B	42.0620284176	16.6155581488	35.3380431326	52.9121751338	72.6860743039	48.6738359104	78.4354038553	80.5106171161	30.5231612234	108.258478045	119.117675639	33.6038942225	104.669512366	14.8990580695	8.92539044245	73.3368162664	70.2081149616	34.0256210821	41.1778784379	160.879923408	97.2413041562	46.9902497491	22.87088187	45.4225359175	16.6353860004	113.331708768	29.8381251264	34.023129389	27.0030428148	28.6817313129	38.3103279759	66.757591071	29.4481350276	108.946917879	60.4783018891	11.1786217453	110.139854321	17.6608219551	41.9692799115	35.6669885484	121.46588955	270.466824152	48.5962528632	64.5011891828	34.8240140465	37.3502361905	54.9816450349	56.6729511609	108.523380019
CAPN8	0.0102043504683	0.0402823455166	0.0365972026517	0.00610674272827	0.0	0.00365161874282	0.320301880841	0.00668906563904	0.054254892879	0.0	0.0543264799422	0.0214038367456	0.00881038173311	0.0157340396591	0.0599541913718	0.0	0.00943762139664	0.0335947031529	0.0156574098422	0.00734150935942	0.0193952663769	0.0287073661127	0.0284987472466	0.0245756104943	0.136136413636	0.00690983145109	0.0287440265101	0.0194547174469	0.00344419733423	0.1381359608	0.422746601378	0.00543103031505	0.00996516779766	0.0220613889338	0.0	0.0200633238	0.0	0.0188496633112	0.00466387844286	0.0621529286076	0.0273782347651	0.0	0.0	0.00302620294978	0.0194555626074	0.00656677655435	0.0135807320471	0.0395261224656	0.0
HCRTR1	0.0138079196329	0.0272538360597	0.165070520518	0.173528895791	0.0	0.155646323208	0.0438283252891	0.00678843408873	0.0367072457425	0.103702578008	0.0441068153026	0.0923176430077	0.017882526176	0.0	0.0442507870641	0.0	0.0478891030994	0.0	0.0158900062354	0.0149011401853	0.0	1.04881767296	1.95947270015	0.00712591140883	0.0224041246202	0.0420748767327	0.00729275731238	0.0473849380694	0.0489350695524	17.476773115	0.00922637962435	0.0110234204049	0.0741634953427	0.0127937821226	0.107356767836	0.111987543869	0.00736606328786	0.0127531211769	0.0378652961303	0.0464772239273	0.00694623704556	0.0	0.0	0.018426949627	0.0723968003412	0.0	0.0689123932648	0.0467988465888	0.0367385167422
WTAP	10.2538961196	10.6306883255	11.6535313876	18.0257679638	12.3526062191	14.7380986023	10.3363053427	25.990629579	25.3324966721	17.467054945	15.60136234	18.8399397956	26.3319369763	12.5444232647	11.6542721036	30.3556568301	11.4263597137	24.7756780433	17.1963855182	14.4230461761	15.5074888911	17.8896722537	13.248368569	13.7038903439	17.2158622407	10.4981460359	12.2648591758	18.1192281789	15.7597112195	13.8220852981	15.7799324615	15.9175505697	18.9000249886	11.4598865983	12.9806249151	10.0282549205	20.7945002666	18.1354151884	12.3898658763	18.6621235185	13.5076978344	10.87194738	24.5344087018	12.4537501287	18.9840282926	21.1732204738	15.335875108	14.2327849383	11.9728147869
CLTB	85.3135079562	33.8062851268	41.9247629995	51.8821794066	84.391862142	77.5848957598	69.683354398	80.7859879296	21.0508718285	34.0781995011	59.1055191911	44.7594220767	112.429406603	67.7187048021	35.2376569757	41.5294874378	33.7762055539	69.9557747776	38.3840595989	30.4525664207	62.4450034319	15.7528116561	36.955090087	26.7833898116	58.1716924282	28.5651957752	22.4791679573	27.6226379246	53.5854268452	22.6287344018	25.5919498989	34.6700141516	49.7345445624	44.2505864661	41.5016006691	98.4341301674	61.2123544059	58.92526163	18.312559736	39.4907525173	41.5236784392	20.7987495436	86.9900995237	87.2215034091	37.7169092588	48.1656667475	11.7922049185	98.9445786188	27.4580052532
WRAP73	1.50033833113	1.67549623686	4.73671204545	4.26974713875	1.89363054545	2.04452231726	2.55070017142	2.78832698332	3.4343951293	3.70404513222	2.00555112231	3.77054311662	3.10410928597	2.64819364924	1.00480827833	3.27799081505	3.05445315072	3.76189986826	4.53826853259	3.74955328937	2.95585083904	3.09701287315	2.61235767994	3.59335796874	4.52709849652	2.84024968783	4.08228682446	2.92506026239	3.46404359283	2.62970440001	3.13480929378	3.95304726668	1.2224882737	4.11663494892	3.8668867849	2.47955663699	4.24721939401	2.89157735352	3.95832023882	4.93620111147	4.80898477619	3.19954746528	2.64957721768	4.41978771501	2.82954088181	2.13203993823	4.49735836171	2.22879023311	2.5644731206
C6orf132	0.242275386133	0.719842143802	0.573106923643	0.0647820950719	2.45797719953	0.0830087763254	0.793560058427	1.97166164658	0.0171295122974	0.0819834741561	8.74620595701	0.107447135513	4.28928780038	16.3215356572	0.0	5.16357971013	0.293199845585	0.0197990188005	0.246181464089	1.92198829295	0.117571772363	0.106043803806	0.375204391106	0.340512903842	0.0613355962797	0.290588060657	5.4940942977	1.88396621766	0.180075424196	0.0274136887152	0.103332220136	8.69147469991	0.00251698536707	3.12840834919	1.09643616507	0.0874154215885	0.753475602737	0.10950337585	0.703262772648	0.0371806163391	0.360452121482	0.0283437154139	1.2488649636	0.00687917938497	0.105652147438	30.9897571079	3.81781095338	0.0474213481342	0.181727512727
PELI3	10.2156412728	2.80122021627	5.09260214895	10.2685796698	1.36082204704	7.45619250322	6.17772487707	3.42342494773	4.08378393646	5.05566149442	3.57787610194	4.19634049841	3.00606813684	2.11198423125	7.82782446858	1.60486474525	1.74108970342	8.58444592066	8.41196936057	5.05347916129	1.91858804956	5.2675750061	2.77953522878	2.69753318492	9.13802954338	0.731041159329	4.18618015631	2.243498591	3.2976987603	1.67456720012	3.27024631152	1.74531125399	12.5591979365	4.10123162952	2.6330690741	7.44915542291	2.95162246117	5.20995859641	1.38775924527	5.61954994939	4.00537437872	4.29021964681	3.94540405888	1.67685867415	8.07471592087	2.49674665376	6.28601790015	9.65724051037	2.96820264964
MEIOC	0.020513798595	0.0971754851538	0.0441427985057	0.044194970257	0.00922797980788	0.052854095517	0.0499205422631	0.0100852679748	0.0545342865659	0.0851895495383	0.0262109962932	0.303348231966	0.0185970794348	0.0166058176725	0.157779319284	0.0683618107472	0.0683007972466	0.0427724251962	0.113313888118	0.0243517413483	0.0257335916673	0.125520115602	0.360933373189	0.0783411559066	0.0443797195016	0.156271829891	0.0541725903272	0.201806593023	0.0893178905855	0.279678158226	0.0301558682623	0.131015957234	0.0540890185676	0.034212853064	0.0797475351735	0.00907498929924	0.0569058121906	0.0416828114387	0.126573186129	0.124288378355	0.0908134361659	0.0328132103639	0.0	0.184332282175	0.103645485269	0.0198017794577	0.176093617953	0.099324170365	0.0409355583517
TRAPPC3	19.9335896192	15.1705422319	22.3037277952	23.0312746028	18.0308092917	14.3524457185	13.3717441059	21.6481681067	25.7138913781	21.2583280206	16.8422130595	23.07173391	28.5264623071	16.3289621227	15.9263626255	15.8618281695	15.4419180093	33.0131865989	20.2772202876	31.0491851361	17.3819948341	24.8696136939	21.6735679666	12.439748197	21.1776888332	14.7999303433	21.6591170328	10.791083322	10.490054416	12.0845718306	12.158537195	18.1003875452	19.7890884537	20.0051949271	22.0960700305	20.6299662186	18.8477322181	19.2571623552	20.3426767569	24.5877070899	26.6904953708	18.927038504	29.1298078834	15.3200241607	31.642426998	15.0173298731	19.55200319	30.9206494364	11.1509575159
ASCC2	10.1116471347	8.81739090822	9.23088005017	11.7610362564	17.4883170778	14.1633939177	10.4226039588	13.0588790707	26.2525362042	14.0714279494	14.5753425165	11.8341007166	14.0161265694	21.8368425255	9.7706734624	15.51345266	12.0509921618	13.959191878	9.09220817093	17.1548138291	13.286628393	10.5814630627	20.9374181629	10.3424841382	39.5785766546	9.32003577658	14.3528169582	14.136768996	10.9816171588	13.2296687415	7.71741341379	22.1532689215	12.412556093	17.9705677895	11.0211072575	11.054469106	9.75170215337	20.1963051612	15.3354798896	7.98089893072	28.0831130989	21.5609048415	18.8398739138	16.480821955	16.7049905344	11.6114625717	18.8450711303	11.7684261596	13.5994409835
LVRN	0.0798387396493	0.0315168682824	0.0477226934318	0.0167226836736	0.0269361476603	0.0342842757916	0.0168946437748	0.0261675925241	0.0247619025868	0.0141086690003	0.940777012674	0.027212804494	0.0413594050256	0.0553963385466	0.0042643728643	0.443434922184	0.0664558729087	0.0	0.0	0.0603118933451	0.0485594806649	0.0505363850103	0.0724665251715	0.0549369541404	0.0546958642149	0.078390559217	1.38028070279	0.283117150318	0.137431570302	0.00514654488127	0.0284521748995	0.157221616583	0.00519782511608	0.0221924692607	0.0650306710875	0.0588657194674	0.0312336179617	0.511262557706	0.0145960559827	0.0179157231474	0.088360405962	0.18091891864	0.0897763732506	0.0260446809626	0.0202960178939	0.0256891982144	0.0212511033118	0.0283481000886	0.00354042818816
TMEM106A	1.64408432404	16.4348441108	3.68303388714	2.25143329446	8.80054723883	2.52294698017	2.75815804749	7.51973651216	1.46345128724	4.15733605882	3.7482243741	0.85047490089	7.8903384703	13.4572269098	1.02845657886	2.73895463712	3.08904930967	2.10220840315	1.03974481114	2.78658819943	7.8319267673	1.88550494263	2.32165598166	1.97211839405	2.5260937581	4.35284223764	2.68062757266	5.32576942043	0.594909263226	2.54926194553	1.64950231193	2.34128573959	2.03465863467	3.34858737745	1.00902241764	0.567875637351	2.39151384127	4.37763273857	0.744655928511	3.41391442156	7.40642864818	1.55479473594	12.4383959283	3.83906288933	3.65232998327	5.91915322991	2.42462196729	3.2080507474	2.63382914848
UMPS	2.43269345503	3.25166420616	2.5516648542	3.72952693635	2.16716987212	4.27764081235	3.88058309111	3.08392138554	4.13486854147	3.26537036973	3.40902209811	5.33539558376	3.88690002126	1.94015095709	2.96089378727	4.34852914744	2.87057103171	3.20151399129	8.21620877105	7.29249492829	3.77343493075	4.71492447612	3.09929046616	2.68166126704	3.64471564523	3.33007743541	3.86438196754	3.61974077512	6.20299440011	4.45888255415	4.1727729207	3.16617243644	3.14935942597	7.15932552611	4.82431806871	1.89672664592	3.0877752004	2.8925068252	5.35161436418	4.71270272575	5.57037802948	3.37549855444	1.86510956548	2.27004750735	3.85402741424	1.83316952462	2.65149502899	3.12743990179	1.72665454168
CCNK	0.186915893103	0.621246551209	1.45630153267	0.426220925924	0.227120004489	1.33314114457	0.404624663097	0.74994028122	0.532597798194	0.878922019994	0.997400685831	1.79130844899	0.740132087646	0.0248452353741	1.0121317796	0.690699870549	1.03424849216	0.292356564577	0.42772919826	1.01089189994	0.833043207538	1.25113825975	1.31854897328	0.909186541041	0.422967341511	1.40971993927	1.2300415179	2.09636461596	1.04857121333	1.44794847123	1.53320878689	1.51623795048	0.440601044328	2.23750486671	0.911577249141	0.0	0.208595800489	0.845327139382	1.20485115109	0.760358982979	1.62337277935	1.51210618406	0.0	1.37814902198	1.09369610878	0.748673241918	1.88287102106	0.963267312354	0.765993604669
ST3GAL2	3.97466153104	3.10513605153	5.39296605298	5.45519890426	4.68598666112	4.77093282689	8.85757529895	5.42650449967	4.81458906806	3.90104697859	6.10017383745	3.11352018314	4.57012511868	3.7475304657	1.99807925793	8.23911979503	5.64477075657	3.83272290103	8.48473496745	2.4977195141	6.2937639393	3.54304108837	3.68812805512	4.71415897857	5.16595488852	8.92846098811	2.74921981963	3.10573320384	12.6611041037	9.7928988402	6.3604714349	9.81602100475	3.07440153407	4.85154162053	6.74186115999	2.96128399794	6.17637451866	4.70722623795	6.18542474986	2.78362238848	5.58000118528	2.25405522925	3.38219821843	9.07667337143	4.59763856211	3.53053737736	5.24998431364	6.32009338958	5.31900501779
HAVCR2	1.10028864955	29.574943684	0.660459997195	0.637624850357	27.0503218046	0.852267079831	4.63207252421	10.814207495	2.36038735463	33.0337868755	3.7717163159	1.33287273067	20.2562904965	14.9681178589	0.349638218031	4.74148694508	4.08978479692	2.73587820538	0.566317483009	12.5954825339	19.8064949711	2.11583249797	1.29333668038	7.5471157149	2.95789022156	27.1520918638	2.42258342884	2.81465369515	0.220942904913	2.47793959665	0.235762619612	3.21711163978	1.01555992552	5.187717215	1.57275568382	0.397068156929	12.2842079201	19.8359109947	0.432862846351	0.92867874687	16.2457291885	2.50166818159	42.3709467155	3.87844661583	4.73555076813	2.50063679805	2.56724389306	4.67552604616	5.26212613067
UCN3	0.0147169410087	0.580960938673	0.0	0.0	0.0	0.0	0.0	0.0	0.0	0.0	0.0	0.0115759083732	0.0190597924826	0.0	0.0471639638791	0.0	0.0	0.0	0.0	0.0	0.0167833705048	0.0310518010119	0.0	0.0	0.0	0.0	0.0	0.0	0.0298037875988	0.0	0.0	0.0	0.0	0.0	0.0	0.0	0.0	0.0271854033088	0.0	0.0	0.0148070619688	0.0	0.0225665156398	0.0130933714294	0.196414713168	0.0142061266126	0.0	0.0	0.0
PGRMC2	18.2024318364	24.1577272294	14.0795769318	25.3012251918	13.7128787323	28.13142667	13.426399108	15.7394437473	23.9614283195	16.0595630481	22.2105878399	23.1428082574	13.1020622773	15.4473236896	23.0130780951	28.5799440362	22.7311456129	33.8717299455	17.8894402929	35.4968738192	18.1460669946	21.0435357052	10.5512576514	16.0490651699	25.7518090398	11.7375899799	11.6502223713	13.415448303	14.515333649	14.4701350607	13.3208857491	22.6936482231	39.4623804229	12.2352945377	17.5081874106	17.0405797931	22.2312503289	44.9564062499	23.7699232751	37.7828426611	17.3075541456	17.0334533853	18.9020178991	10.5052653258	24.343487426	21.12677662	25.91201326	32.7060463956	10.9954862416
AL049839.2	0.0575817711459	0.250038617231	0.0137675380334	0.00516892863469	0.0	0.1298152249	0.0	0.0	0.0	0.864920751693	0.00613113974264	0.0317044767966	0.0	0.0	0.0276801874739	0.0	0.00798828338626	0.0	0.0	0.0	0.0985003811824	0.0	0.0	0.986586732869	0.0124572874206	0.579019994215	0.0304122484595	0.0329341027012	0.0	0.0946514543766	0.00769516761627	0.0183879422209	0.0337392573886	0.0	0.00639570106021	0.0339643877305	0.0	0.0744562725118	0.0	0.0	0.0	0.0	0.00882941596602	0.00512293632712	0.131742133757	0.0444665195568	0.0	0.00557601423327	0.0
PPFIA4	0.0400254705501	0.68946842624	1.94008112292	8.60676405956	0.00613812286232	0.580084860439	11.1974259791	0.0393557141009	5.89577660908	0.0225052674154	0.0484294982762	2.76190417146	0.0141372726769	0.0	2.34969536746	0.413704556032	2.42552411713	2.2560898734	4.27110009985	0.212045358616	2.02085128732	1.37425092353	3.59738920224	0.533303297929	13.1835452239	0.630146446321	0.392046372085	0.422474611638	3.71019850978	0.381739280291	0.425485612325	0.107481471891	2.27594700368	0.0472000541234	0.244513179494	0.952403314494	0.157230203062	0.426811112008	4.23329680822	5.66720076812	0.0750497011295	1.96981243593	0.00278972069308	0.100355087498	1.12040416818	0.140495328609	1.6743404308	1.4323302551	0.425980584771
PPP1R15B	6.74383338512	11.6636772344	11.2691657953	9.94193137821	7.28778337108	12.1981642962	15.4502826356	10.4913112439	11.494629617	12.6338096908	7.15185779878	19.397563853	7.14550781499	4.85270653895	11.2771230259	7.98752355349	9.56660282424	9.32499207971	15.0821026259	7.92678510385	9.59031395136	14.0223208549	23.7892679266	8.6066395361	11.2675187584	14.0051007282	10.4926970007	13.8865487849	11.067371672	11.9014209761	13.8843157008	7.2720072442	9.42331584993	18.4606982081	10.3350687063	2.74023471605	8.43888171672	8.69392006332	22.2367157072	29.0812597314	8.18906729278	14.5480176606	2.83905503821	16.3402870687	11.8850522002	10.4397500563	7.83757115327	9.17409343261	6.04999097774
ZNF670	0.655398375914	0.996432502639	1.35526705391	1.24821331356	0.836668626623	0.798682637447	1.09638951542	0.505094902277	2.60759971363	0.954719621641	1.38626791466	2.57061796773	1.14702863486	0.460895314187	1.63205291257	1.07642525756	1.36384515104	1.20520108366	1.09056921933	1.60573610527	1.40394493491	3.33565485293	2.26326360029	1.25238071694	2.26096642991	1.21445312455	1.72141257258	2.75570901623	1.65011943376	1.66994283031	1.2901291974	0.636362047546	1.1849320821	1.65766096371	1.29852617855	0.169783613742	1.16229385984	1.1779432527	2.73236850398	1.62686266743	0.614856936317	0.991686307002	0.190129118731	1.48925608836	1.75616536777	2.03473909757	1.60895577527	1.42370687988	0.860121638082
C6orf52	0.679243431171	1.08437279277	0.59707351737	0.269000635565	0.651546003059	0.171576511427	0.042274832613	0.510729835264	0.477983151291	0.282428740532	0.765782128127	0.51855879138	0.258730214696	0.577567406039	0.320117401894	0.391620194785	0.194005040746	1.27156542592	0.160931250934	0.625224197528	0.615137109	0.084303532159	0.523068070221	0.206200015654	1.5127008124	0.507294186851	0.464261550352	0.731286103056	1.05189838584	1.95101790444	0.0533961065138	1.65870055269	0.195094838633	0.277656911791	0.465981807902	3.24054453864	0.703392382785	0.0	1.53397283373	0.730085984911	0.341701430049	0.0998617534018	1.10279804937	0.248833303183	0.304715779963	0.154274678146	0.319055026193	0.580372250683	0.903626209871
CREB3L3	0.0	1.67910293702	0.0	0.0	0.0148326508898	0.0	0.00697739955748	0.00648424734838	0.00876560255874	0.0174804196203	0.0140434694478	0.0	0.136649744461	0.0381306636996	0.0105669821985	0.0	0.00914864269816	0.0	0.0075889910288	0.0	0.00752055437109	0.00695708760536	0.0	0.00680660245847	0.0713340188927	0.0334912667047	0.0905576369178	0.0150872132912	0.0066774729497	0.0	0.0176258992376	0.0210589315875	0.00644002379953	0.012220498383	0.0	0.0	0.0	0.353268123654	0.0	0.00634208571461	0.0928897091395	0.00659281478769	0.010111956224	0.0293354102227	0.0188598358958	0.0	0.0131648918575	0.00638597298486	0.0263192099962
SNX33	6.57631140179	4.80119816701	14.5267211356	12.5530136415	6.4185888828	12.9101576184	8.61006574614	5.26495621387	3.30217039639	8.61075254665	19.1423431537	6.64718494798	12.3241265578	5.13884973866	11.9476544862	10.6866539387	7.14687215039	9.88139585521	6.38276032811	6.92800489545	6.10136715954	5.73961986237	8.51799369625	7.38637913217	7.42135508956	6.74688092039	9.77004723053	8.19120568234	6.57633525065	7.82589732916	5.59965662466	21.3561838768	11.1408020807	13.529103472	14.8145904642	5.64225862853	6.64471891238	12.6448789017	5.17982640202	3.65217654174	8.89311254309	22.6448846445	10.1887479954	7.28899223679	11.3063899752	10.2692839329	10.1258535098	9.74673640389	6.61290089951
C17orf75	2.2552301936	4.90982842074	2.91308632452	2.78672161319	1.3874962955	3.56393408872	4.13749826045	1.24034388564	5.21832507671	1.88935724747	1.95576842119	4.54243484666	1.96043579821	1.33779905706	3.76654373557	2.08680347139	2.59086054763	3.20080655117	6.7343119841	4.24335148147	1.73330697478	3.91447442722	2.61646303379	2.35313733543	5.3449163618	1.63128841766	4.00722276339	2.83317626664	2.45180287529	4.35533264479	5.69468545724	1.83237285794	2.9685413119	2.72245665589	4.52116007764	1.9508960881	1.46406025977	2.58024524784	4.27767680689	3.69271144923	4.07374778068	1.89474280991	1.36814415377	2.10771344961	3.33191310342	1.49387073578	2.33399312715	2.87510076752	3.70833083619
GIMAP5	0.207906379363	0.288987367935	0.136525992936	0.0867438958789	0.823284676733	0.358373290408	0.173501352485	0.293684474995	0.0700608697963	0.338940244865	0.302438723644	0.117467350761	1.11874756074	0.416515066778	0.234607679717	0.476437687477	0.324988428396	0.192807935411	0.101094269483	0.628859741521	0.637829301891	0.546791787011	0.205473557706	0.172276676982	0.167878007586	0.594857318755	0.163937701852	0.616336803487	0.0385457707297	0.472845531086	0.101745656783	0.299231669926	0.0629116965964	0.162791384529	0.0748066901821	0.0604527806489	0.0343668195646	1.8066505797	0.0562109096757	0.0563226846086	1.04884378595	0.0761141615051	0.597183866044	0.169338910876	0.390810240096	0.293968595797	0.0467658171372	0.810987862193	0.0467470365578
SFPQ	20.5854847355	20.254617159	28.5954379043	29.4326348691	21.4415556106	24.2364299003	25.6176718702	31.0396641977	54.7627915422	26.6212572969	28.1885829027	24.2935074672	41.7118399556	24.3417797683	17.1139263491	34.6285490071	32.8933004986	24.4695304735	51.1230244783	43.1371192913	28.913683752	39.9742805432	47.7385984406	27.8060471203	42.3430513427	29.6751114007	41.6205143094	38.1456153361	72.9329907088	63.9335560428	51.6452376832	35.0100625678	27.2537453719	59.0407822637	36.1116448611	18.8144859115	29.1237477998	24.8468582463	86.894358472	45.5684512326	42.6457741131	49.4645683033	23.0685340055	41.1081788583	31.7825924039	21.2276950369	25.7414162265	23.8492511213	28.6512540899
ARX	0.0122811746943	0.0121201864814	0.0	0.0385854411885	0.0	0.547153676828	0.0	0.0	0.424430719722	0.0759591901256	0.0	0.00483000349369	0.0	0.0	0.0	0.0	0.741135489455	0.0067386686281	75.2584619038	0.119281658327	0.350139857541	0.00647812260332	3.59495445491	0.0	0.139488266846	0.0	0.0194591862362	0.00702426237723	0.0310887909585	0.0	0.0	0.00980455820435	0.00599665637522	0.0056895853042	0.0136409006618	0.0362200198781	0.013103191857	0.0226860111061	0.0252588910382	2.5452536472	0.0	0.0	0.0753263387142	0.0	0.00585380627363	0.0	0.0	0.00594632672234	0.187888898993
NBPF14	0.311927240924	0.293453362882	0.411237588273	0.656838747899	0.57864844818	1.26279944221	1.33093147911	0.739538150368	0.61320656784	0.495841230359	0.951384782691	0.427647456904	0.790959364498	0.443313969511	0.58624075274	1.66009985575	0.752230458418	0.489468946696	0.357285137727	0.685831249383	0.852743717626	0.921097497828	0.915930354722	0.869579980177	0.810421808631	0.559634754455	1.41805366638	1.07544958691	0.969680841158	0.749798407671	1.04603660164	1.90375453002	0.757269407981	1.28842340355	0.896917364974	0.0193446474605	0.726262469362	0.646203049928	0.423700037765	0.82004801445	1.79796546455	1.74282332203	0.413483531862	1.82848996851	0.407132322961	0.406626337838	0.555778792944	0.479907240193	0.74074079865
SMCHD1	2.75101934138	2.01552050468	9.34069047829	8.14078319809	1.9795855104	5.06665719288	4.52522134121	2.37504013483	4.02869462681	5.24101348377	3.15097499087	5.93300856672	2.0286737355	2.79830604078	6.11161536851	4.65559113919	3.12822289616	5.65381031047	7.04242083152	4.08799051433	4.41068626338	11.7279676942	11.0019798864	5.72072136468	8.00897117758	4.70558276805	4.37419344686	11.10684191	5.12302943591	9.20802107054	5.70601027367	7.62336600453	7.73897923709	7.20465337201	5.87986498404	1.91317348733	2.23145747596	7.7134407226	9.35276535823	4.60003579304	5.06423347925	2.93102506707	1.43494207557	11.9918553661	6.50671134742	3.27404097361	8.00974447287	6.58433982038	5.53010359594
LCE4A	0.0	0.0	0.0	0.0	0.0	0.0	0.0	0.0	0.0	0.0	0.0	0.0	0.0	0.0	0.0	0.0	0.0	0.0	0.0	0.0	0.0	0.0	0.0	0.0	0.0	0.0	0.0	0.0	0.0	0.0	0.0	0.0	0.0	0.0	0.0	0.0	0.0	0.0	0.0	0.0	0.07839032807	0.0	0.0	0.0	0.0	0.0	0.0	0.0	0.0
PCLAF	0.964838553543	0.172701296713	6.90934625594	5.06076596522	5.37212874583	19.4060202591	2.68222151687	4.76207015119	11.2216380073	0.793999920656	0.36762373008	7.56309214443	12.7466828569	4.12940587186	1.24288538985	4.36680639479	3.33972500245	9.58640039361	15.5173485664	10.4122814478	5.48538440387	12.8182233743	27.2481987101	7.13209076104	8.59492780823	2.28187283405	17.3609224391	7.83400519773	21.9290107255	6.14177419262	6.75038898138	2.57511706051	3.9582621481	18.8698829737	33.006135511	1.92491848546	5.41453785548	2.80445028242	20.5119422326	12.8222264402	16.1838728728	25.3579961333	2.43674855543	6.56842618145	5.64942158389	0.488502050631	10.6219946287	4.28227887948	7.9404882695
CAPN5	4.55399342274	11.1085460054	7.36849531685	7.72086793386	7.34718739445	7.73926658426	5.64867455268	10.9297510027	1.08691339324	33.5922786856	8.09379851405	2.42181670474	1.29826676009	7.26025646817	14.2317987664	3.46978287144	2.542984381	2.12159867138	2.36984521961	2.82818372394	3.86730665151	7.10676315083	4.38245193853	3.26367204796	1.85269926292	32.5361214155	14.8549184945	9.23266495071	4.62572571069	7.80976083089	3.36064668042	15.0272997526	4.06965428716	7.56594520787	1.77195874789	1.71897065796	0.815912763659	5.72454227313	0.290609699768	1.32214898816	3.25342321688	4.91641146423	3.21479522186	1.08042610822	9.43347621513	5.90270781405	4.99158639056	1.46720163164	8.07020566416
MICAL1	58.3021129008	2.7738908764	66.4284363757	85.3901750685	7.27614470164	15.7832153214	18.8920331477	4.80879355663	80.4449994125	8.50313244483	14.4629285347	12.1291107972	14.4342271981	5.12595656728	40.2939068957	5.475489703	9.57988658403	61.4482078117	29.3587840307	5.8396546256	25.3577318988	39.060313977	20.5769760005	8.44495437126	77.9751574154	13.443272945	5.58112774035	4.2201561298	3.70773310009	4.55705105299	17.3562924237	6.68981013725	46.425426965	2.14744430727	23.9551808053	4.84231277092	5.40223281578	35.0589988589	20.1378656667	35.2776432609	9.63466311098	2.74742101553	8.35882160944	6.70701271179	56.7221449969	8.04530639794	5.33630383519	52.0659491365	6.27646266239
CKB	927.541134653	71.7004620453	160.119753174	114.345487997	23.9015637195	44.4109953592	7.37197686164	196.57568462	60.2776332001	11.266118438	44.5058698824	232.734310105	45.4607114816	8.87614418656	189.998853364	10.571250863	5.91159308873	243.580324517	21.7472447122	38.3599007763	10.9717590321	135.673916328	102.034655243	2.88890162059	49.6083280436	6.0621978446	44.7325547068	67.7807895599	31.2353520688	11.5867603012	5.76541909313	71.0388695305	113.493999222	1.19551638453	298.276410989	450.259684457	550.919288075	26.2055472585	106.603435101	19.3513169571	22.0225227393	6.78042223735	34.5473146887	30.9472552736	101.562060591	14.6202280178	38.8220872157	395.637914971	140.103028724
GLIPR1L2	0.41005513734	0.128761791157	0.0946999558738	0.184046591397	0.0943262669518	0.545264720815	0.364835151743	0.009163490448	0.393302641668	1.09929239397	0.396922545449	0.274889644747	0.0603476279133	0.0	0.559994294079	0.155284123673	0.109894751313	0.0818170384144	0.504061184608	0.316804531059	0.14879188627	0.0884853432529	0.253766681287	0.317428330166	0.463720059069	0.638949744156	0.344549109328	0.223871952789	0.33971599585	0.153190506899	0.44213103288	0.669607347128	0.919200399604	0.259048770473	0.548616149361	0.480990395901	0.0894889229621	0.129112733393	0.0319457214714	0.179251773548	0.220347835103	0.0838522543604	0.121466205555	0.058039219001	0.346483549803	0.251886994292	0.0558135837377	0.735505702246	0.080587245102
CHGB	0.611393977076	7.42502668258	0.0325882330804	0.00349572307003	0.0700716014695	0.0627096069881	0.00824056274087	0.00382906601962	0.0155287433202	0.0412900231472	0.00829292418552	0.00918925471744	0.0453904650082	0.0720539218612	0.0623999522105	0.198478468731	10.7346481686	0.0726498316571	0.0313700608216	2.14750237923	1.26569188812	0.0041082867932	0.575058844936	0.598893963878	0.113734896804	0.201727463021	0.0822706646309	0.0534556434758	1.21055296046	4.99672878955	2.14413331435	0.0248713644064	0.0304236096761	0.0216492798256	0.0129761511477	0.505339161572	0.0	0.0575479320318	0.00533954947636	0.0149804679548	0.0940338224258	0.00389317706757	0.0	0.0381108054836	0.0259865111137	0.0187953163562	1.50040287014	0.0301682657613	0.0259032871628
NEMP1	1.87184638618	1.97555217583	13.337726977	10.2650793338	1.53793385377	8.92490934228	2.83817584179	2.63149342241	7.70070009442	5.61783569797	2.10509589566	11.2944199215	2.99320216913	2.63692912105	15.2101304675	2.94154243714	4.64419595088	11.0245610431	10.9378473755	5.53259129261	2.8474099504	28.5928987594	22.5881979361	6.89460891864	9.00275809355	4.87416217858	4.58854975121	10.4441921232	4.29826172939	9.38175820476	6.55769296066	4.72270521764	8.67153491939	4.89062718172	14.6670366972	1.29115994827	3.62455222488	4.83507733691	15.8872878413	10.589774287	5.2265712079	7.04923207521	1.15283741426	11.2720440091	8.90443516449	2.46690832137	9.22772198827	4.83567623417	4.11602688449
FAM20B	11.4167784795	12.1733394899	15.7286348012	18.5176016693	6.04805945303	19.678141064	18.0140489086	9.92603730836	16.2384202612	9.9040987375	9.94234615847	17.9302942413	7.13156269146	9.03959268677	19.6809387275	5.80140021884	6.62503831477	17.6025093881	28.8881207979	11.1782436642	9.66815520982	20.3032193204	23.9748696053	8.57525736237	14.1969510125	10.7793874086	11.0959272318	12.4408701113	12.3804904074	13.4681423527	15.0696739409	14.040588434	19.2311886194	12.5372984631	29.7173808615	5.07130658848	11.0826575411	10.0044444963	30.9712791033	27.4743710973	6.51128229248	11.7937607183	6.20158790459	9.64733656437	15.433281557	5.25619627474	19.5981095187	16.5692449426	5.52829507367
PSG1	0.00711966507173	0.0	0.00851139672413	0.0319554608398	0.0	0.0420381474783	0.0	0.00350026494637	0.0	0.0	0.170568282923	0.0028000584656	0.0922062123731	0.0	0.0513375135955	0.0	0.0	0.0	0.0	0.0	0.012179023144	0.0	0.0	0.0	0.065461651766	0.0	0.0827267104437	0.0692260101083	0.0	0.0	0.0	0.0682069971273	0.0	0.00659675361212	0.0	0.0209975362164	0.0	0.0	0.0	0.00684704920126	0.0752142635786	0.0320298371322	0.0	0.0	0.0	0.137450932756	5.35123000139	0.0	0.0
ZNF558	0.958111702032	1.19684768158	4.71574850704	2.88625673786	0.616406838165	2.37916703746	1.86306798976	0.413751076222	3.31863956326	3.35192599627	1.81976183135	1.74317564506	0.916658641393	0.726176685235	3.7966299369	2.07275419811	1.4040237724	2.8701195138	2.10583744415	2.42423743735	2.12376081314	2.80240227607	5.02619841224	3.06919552137	2.84541325346	2.08442867145	4.44489280912	10.1329791227	1.05973878192	5.35823238422	2.43393337521	1.91224825448	2.21691051923	2.76519685534	3.11587239702	0.365939924685	1.50803584777	2.88595777061	2.15992736058	5.57005611918	1.57406450548	1.60073607491	0.88677803394	1.5531579892	3.42100615834	0.706140311095	2.10654677576	3.07177473247	1.08514643092
MRPL4	13.4817304317	11.4507829239	9.523976889	11.4672084857	9.27168234124	14.9297912686	13.7730781437	12.4028293508	16.1378490563	12.1804680599	7.90977886271	8.77152369116	18.308639973	10.2665884509	13.1688276541	11.1427973064	9.48700311292	14.8472042797	14.0016175927	13.8701350555	10.9508399785	6.6147202647	11.497318923	20.3643946074	11.4290944427	8.61196571536	19.576158098	19.5664401054	28.0272768196	10.1576332071	9.17368724893	14.5077204606	10.652925973	17.388463077	13.5381481477	14.3392032946	18.7683166131	19.0284464241	17.2954763972	15.2690029937	26.5959572031	13.8988717043	18.6165437131	15.302837645	8.04962509986	5.36970643263	8.98281004149	11.7736567816	15.57434186
MAT2A	17.3887529422	44.4052515104	55.2021572642	51.1100967768	8.79510745018	25.2507702626	48.0025589534	9.89179086333	30.7462369121	39.0469850463	23.5691669806	32.4754924453	18.9824828719	6.7408384957	31.2184026568	14.412461045	35.7972870727	15.3721601645	28.8793125495	31.8605406254	46.6762477948	58.1229922752	83.4923421965	17.1434150746	38.6365045921	31.0625490113	18.5093593735	28.8416745469	35.4018781244	36.5044026982	18.7567301083	16.9049200523	29.9457489816	24.2658898521	36.4727161155	0.783529358028	21.45857195	18.328790303	31.802574452	29.6568903354	22.5481820861	51.7586828507	4.65311795631	26.0209965924	58.3822395535	3.25977890803	29.7712043936	32.415736847	4.97951006581
HADHA	72.3976182773	102.606452008	50.6124321254	22.8832132717	51.1036937875	36.4309248614	32.8797696552	87.1248008718	28.4943679285	62.949038309	63.7448260367	25.5769558819	65.7285270857	51.9760107448	62.8192811993	47.182433951	40.6620078841	87.1126843326	22.5577630635	49.7692920946	58.0367278563	22.8207515807	44.4459462627	44.1424726033	64.1620580743	63.524062279	41.666302997	38.9564080054	39.6825974899	93.3255947677	52.8872252258	26.355537462	59.5364535344	43.0098789172	40.3687403922	72.4206704567	63.5924478535	60.9306850964	40.6397860337	84.9472673232	52.2377294038	68.3614310861	47.2600038374	60.0611603201	63.1587019717	50.1445329815	40.6489163612	61.9311660072	63.325441911
AFF4	4.28337629783	8.23383693821	12.8727126518	8.94184114979	4.34594964208	12.0934785977	9.23439962745	6.06392783959	5.12207747215	11.8650946432	6.36017257342	22.0299875452	3.26160846485	2.84910212982	13.6244029143	5.38119496189	8.1760861821	5.74704583201	4.92746463078	4.76759190471	9.48081412884	15.7037398903	19.4485496533	7.99828267854	10.6820600061	11.0530121407	9.20276253623	19.0251148528	5.61779103417	17.0460044636	12.4366844081	6.4223440626	10.8284146086	11.3588196512	8.17302828352	3.09823042657	6.25466602539	9.22624026608	12.6443693642	13.9923050629	3.73708905775	12.6700547683	2.64637690711	9.93598783658	11.6971060609	10.9720541666	6.7752381195	13.044595417	4.64395242035
OR4S1	0.0	0.0	0.0	0.0	0.0	0.0	0.0	0.0	0.0	0.0	0.0	0.0	0.0	0.0	0.0	0.0	0.0	0.0	0.0	0.0	0.0	0.0	0.0	0.0	0.0	0.0	0.0	0.0	0.0	0.0	0.0	0.0	0.0	0.0	0.0	0.0560047189083	0.0	0.0	0.0	0.0	0.0	0.0	0.0	0.0	0.0	0.0	0.0	0.0	0.0
TRNAU1AP	4.39562357755	2.5672247464	9.15806346643	7.35104503389	5.71272100011	5.24665529661	3.67554712611	5.13975949271	10.5146930486	4.52090714568	4.47532241615	3.82802481486	7.12520565182	4.30626540967	4.86409147313	5.24387707446	3.6997314799	7.99312704999	4.35600691464	8.88603622758	4.94741527198	8.48360269817	3.51808473896	3.38261774693	9.61587869707	4.38149671462	5.66872741792	3.36930614966	4.77441329524	4.16309996469	3.57492568746	4.52631716582	3.10442908338	5.70113604662	6.79334572523	6.31271005232	7.70129691181	6.09921644172	6.99315630011	9.09679881708	9.53339856195	5.99166814106	6.04286375658	4.15489030745	7.38092867855	2.1907290587	6.56697542487	5.97426659571	2.64317478693
HORMAD1	0.0	0.0	0.0	0.0131834545718	0.0165163572071	0.0472994707178	0.0233082860893	3.32855693884	0.0	0.0973234173453	0.0	0.0288796050891	0.0570605014033	0.00849180186176	0.0	0.431840647222	0.0203742745494	0.0	0.067603552516	5.72152976735	0.025122716764	0.216910709771	0.0307620573189	0.0303169752745	0.135033369817	0.0223757868362	0.0310268161415	0.016799815881	0.0148709127312	0.0	0.971520510948	0.0351741073543	0.0143421070563	0.0	0.00815618093625	0.086626841721	2.21721261496	0.0542577695976	0.0201370951146	0.0564959851766	0.0369406951404	5.01403164864	0.0	0.182926103962	0.0490015916427	0.0637946642062	0.26386712977	0.0142217344311	1.07458251985
ABCC3	0.084499182825	1.81285918038	0.634649277818	0.133565782601	1.13207654553	1.61707381948	0.63749075649	2.20537116509	0.179463266949	0.853734433426	1.04054892597	1.01719652524	0.440115865523	0.295274277447	0.785902539363	0.356490877541	0.649835303947	0.205617008466	0.145861133793	4.90836179983	8.64341835276	0.420526782999	0.425166093075	0.449350456413	0.119221449508	1.02992856155	0.104780856363	0.294180258328	0.171122225448	0.0337475018104	0.0638265088472	0.193578325371	0.679881364221	2.34198339222	0.367257200676	1.04287963413	0.927028335566	0.529343405388	1.4910750229	0.376286091202	1.18468817	3.21928366721	1.36610277745	0.101325861696	0.872072220491	0.684447456516	1.32015903286	3.38688519702	1.83526163657
DEFB126	0.0	0.0	0.0	0.0	0.0	0.0	0.0285274442976	0.0	0.0	0.0238231876555	0.0	0.0	0.0	0.0	0.0	0.0	0.0	0.0	0.0	0.0	0.0	0.0	0.0	0.0	0.0	0.0	0.0284807224505	0.0	0.0	0.0	0.0	0.0	0.0	0.0	0.0	0.0	0.0	0.0	0.0	0.0	0.0	0.0	0.0	0.0	0.0	0.0	0.0	0.0261093674098	0.0
NDC1	1.62674502756	3.25835930551	5.57518530528	3.0594792961	3.02071629249	3.52231374978	3.58790250257	6.46234864974	8.65599923966	5.26926228696	3.51915123128	5.72686224563	6.64995602957	3.48798074193	4.22684638309	4.30127861533	5.36281854406	4.13272639084	5.22034204658	12.4706437932	4.84380819632	4.65142070854	10.6795933487	5.67608610179	4.44192420834	5.34469743797	9.33288593258	8.14365758434	6.48428266902	7.24285137783	5.8324769915	5.87021716534	2.3409404992	18.2752139173	7.70872665552	4.48828470278	3.49694207702	3.16377741331	13.4160209952	8.28864040751	11.8375756172	9.52059203622	3.53329670388	8.940720074	4.23593505767	2.0848562834	9.32367637302	2.88746214441	4.96422500106
MYL4	0.777227202415	0.11718649741	0.451673707272	2.35470923092	4.68601157886	0.602615302361	0.262693122459	0.222897984339	1.00440088977	0.267064340833	0.229880263945	0.101890636048	0.195724030384	3.70755910319	0.657297296115	1.60822806641	5.04677381057	0.308001641403	0.670818563972	1.23484546424	55.9021653758	0.649126891569	0.0452217285159	0.245120898804	0.245212870079	0.734621518308	14.3560423993	2.37086888179	0.153026782292	0.104377970147	1.74555658226	0.344717718774	50.2422156979	0.0800158793881	0.479599392461	0.206936751712	0.138208238805	0.917258106751	0.103608800811	0.311444478185	1.66172162437	0.0107919058689	0.364154042109	0.0768315193901	4.59993241981	0.479326521402	0.7757951676	20.289899024	0.086164846418
NCOA3	2.36886348728	3.8852886389	5.85481678266	2.61891317807	3.2809993244	4.75221193809	6.65400431286	5.6938899868	2.17923604485	6.95521110918	5.25497199796	6.07425194428	14.0709451096	4.09816864355	4.80621112513	4.62715900035	4.53726509958	2.96403571794	3.37673790684	8.76711828352	4.69822511632	6.69228770202	5.61342558387	4.84664768048	2.41916904024	8.52702478618	4.38729224628	8.74721144199	3.43938972338	10.8266018478	7.59268230788	6.40678517453	5.84184814452	8.85742071876	5.20623920355	2.48891716458	4.0927590514	6.81414655657	3.95991589463	2.81181752098	5.34196218041	5.31431875573	7.40650125308	9.71109895256	7.01714889837	7.09122768545	4.86746884758	5.50582295199	4.47403598318
USP22	17.6058540469	25.9486783537	35.9204339348	44.1944863606	14.5660357331	33.9360849283	35.6857460555	17.0102742695	56.3755196409	36.8742912994	26.5048702773	63.4811388909	13.9051376767	9.33544391628	16.5143150845	28.2374497122	74.2199388314	18.4637699148	98.4283842944	22.2023245967	24.0479469154	83.9055422173	38.6458794138	32.0249825839	28.3434093524	35.1644408017	86.2650878734	31.8219555924	95.3318449277	76.6373842801	72.8971050052	34.9077527008	29.915180013	21.1174340605	28.0634682105	9.16143585932	18.953097234	18.6400503298	76.9127592643	60.0555776665	34.8061654082	32.3157914594	13.2654517612	39.0285553894	42.0023153831	23.0544901978	66.9224244177	27.4686230715	19.573966572
MPPED2	0.411507000024	1.93063022685	0.180294787141	0.311376084389	0.215642532536	0.212790876561	0.196041348943	0.425805501304	1.19848575192	0.0571093860475	0.0481747367822	0.0745648361725	0.0279025875066	0.16693015652	0.0172614238913	0.0717978319779	0.122545159323	0.04255793553	0.0297523259365	0.0279007807204	0.0663390514037	1.30010712545	0.0609227214836	0.320220046269	0.158475175997	0.0240718734802	0.0432405259115	0.406647977125	1.52054946613	3.12901138781	3.81498472366	0.0619205037359	0.0147279109608	0.0359324694434	0.122044207971	0.0476555952648	0.176999392651	0.0397980773094	0.00886233629693	0.27764671744	0.062862724962	0.00646171453023	0.0429471323632	0.0306688704946	0.230033090937	0.153898260729	0.0301072420105	0.0625898584364	1.00030550547
NRXN1	0.142986802927	0.0892752268615	0.0290709952278	0.0558822793482	0.0	0.219290204212	0.354031931545	0.00573853747487	0.923145986327	25.7276583618	0.0	0.212696796283	0.00125973512773	0.0	0.158979653525	0.00953382496667	0.020241296386	0.0	3.27864057883	0.0	0.00110927762755	1.05387308788	0.483886941365	0.0	0.00526086424859	0.0839790376734	0.00102747704368	0.225873598544	0.203879181526	0.0188105705178	0.0129990521476	0.0155309040514	0.039895798462	0.0	0.00108039299139	0.0114748597895	0.00311341538175	0.0	4.73734146404	2.18896271053	0.0019573115623	0.0	0.0	0.183462970458	0.160418021802	0.130512333057	0.00388362859598	0.260913916942	0.0336445978119
PRKCQ	0.0643168286875	2.11579097544	0.108926504632	0.00962252147047	0.48823504791	0.661702130186	0.55574405143	0.321473043501	0.131797950703	0.47357171212	0.410896146442	0.0674529410519	1.46462502476	0.836745301811	0.0	0.682928570329	5.15282098511	0.182334670776	1.96756856876	1.83933885841	0.586781269242	0.322297904281	4.64216483108	0.271070102521	0.852254260438	0.538954270791	0.175508670518	0.134882891998	1.95918069618	0.171021482619	0.0644642524164	0.205386896964	0.0314046441308	0.0695251783576	0.059531457213	0.0395177455119	0.0457478358491	2.99988244099	0.0661407319811	1.29378163626	1.65012235355	0.0535828770909	1.05196261071	1.89784345817	0.189048629193	0.243164048847	0.117696929996	1.35982656789	0.0713028268791
MALRD1	0.0817082446441	0.176953788029	0.268620927625	0.0162992973886	0.0561547654432	0.00974641023659	0.00480284693868	0.0312437220904	0.0693880637454	0.00601626574259	0.00966672951583	0.0499872151832	0.0	0.104987962871	0.0109105686907	0.00444920000244	0.0251896313026	0.0	0.0	0.0122468566361	0.0103534479402	0.0	0.0	0.17101271572	0.0319164957426	0.025358841655	0.381200981828	0.155777755535	0.117208058158	0.403807660783	0.00303316785492	0.0471112738908	0.0421130048795	0.0	0.042856375476	0.0200813733137	0.016951128291	0.00419258244063	0.00311204946348	0.0785795912574	0.0205521487293	0.20875354532	0.0278419933353	0.0282699704426	0.0670738918047	0.0306725262937	0.0135929496444	0.0373638100641	0.0483110786925
ADORA2A	0.00842372010991	0.116386164676	0.110774011599	0.192823350883	0.018946739367	0.072346117864	0.0623889015524	0.004141381922	0.0111968917969	0.0707082209332	0.0269079975063	0.115952337628	0.190916118357	0.00487068530349	0.16197497731	0.107333634116	0.0409016112616	0.0369766963499	0.0339287445328	0.0863612229058	0.0480325413922	0.0977542984396	0.0529330416304	0.0260835889107	0.0227799311465	0.089839344476	0.0578376703234	0.0819056132	0.353977730127	0.150684647959	0.0281434284273	0.114324936734	0.0246788224209	0.0429276700891	0.547347238909	0.0248434956283	0.0	0.132263827212	0.0115501344504	0.0526576131811	0.23307085379	0.0589501101884	0.0645833979675	0.0299776689058	0.084318264656	0.0325253554688	0.0252245984219	0.11012262405	0.0336192913761
RPA1	12.9494074527	9.88860680028	23.307575779	17.0481487524	10.1691379735	31.0797010612	19.5292484206	10.965254249	45.7603206084	21.7924474332	17.2223514423	25.399549574	13.0433947682	10.5423509029	17.4984145667	20.2092563824	8.85071544957	15.7209997981	43.3295211527	23.3685964261	17.290661019	18.5259160953	37.7289113341	14.9853946555	16.6370804791	16.210107266	25.0101659521	21.5076109716	12.0441599047	22.7196023013	23.6612420629	26.1236276412	17.7394067225	17.3285955025	29.8163064978	10.4984373932	10.8621643104	17.2972821053	25.6345917467	56.6611037458	14.749904337	32.5174743599	9.51639661722	29.1782873725	29.2782789325	13.2138705731	30.5758065218	14.2056922526	16.863521031
TRIM54	0.0	1.04673859428	0.0305535739135	0.0344133953457	0.143711429389	0.0548746874464	18.077048793	0.0188474830669	0.0339714669353	0.00564550937568	0.0340162908659	0.00502571998837	0.0165497474523	0.0	3.04074470451	0.0125250453035	22.1865640592	0.0140234522246	0.0735286467986	2.5650447491	19.3749560806	0.134812450124	0.0267665513213	0.0	0.110583214237	0.0584085752617	0.0877399969848	0.0146177848024	0.0258788314896	0.00617808824749	0.0256162218659	0.0714129398589	1.62854781291	0.112482525095	0.0212904650706	0.0471096134088	0.0340853652141	0.0	0.00876080205329	0.0122895119709	0.141427798834	0.0127753675843	0.0	0.0	0.718738975207	0.012335276364	0.752561231282	0.0494982218624	0.0
SCUBE3	4.73679031161	2.53518843548	5.89520326338	0.790931105627	0.399594357279	0.126291601567	0.182892098025	1.35028192444	1.49027874737	0.470925736404	0.122702809727	0.205835891139	3.92700128965	0.00555268718802	0.234665725663	0.10824390702	0.0865962063333	0.334599265056	0.201685999481	0.0336815195571	0.0136895354852	0.215285732954	0.605962555477	17.2542320113	0.249308323125	12.1658911213	0.126800388833	1.15069946059	1.91317951389	0.445709257189	190.640635916	0.172499445732	0.790107574598	0.84974992957	0.653320515519	3.89075197489	0.0512299888264	0.0354785035025	0.141549598374	25.0697958121	5.41073716315	0.040802676186	0.00736264784333	1.25380245172	0.208270087372	10.1783536839	1.48575719443	7.87196007648	12.1367957498
DHRS2	0.532895058229	0.249115066345	0.0698534925033	0.0146865707859	1.84520454184	0.373864673425	0.153321798958	0.103416708305	0.0295137234909	0.113582627751	2.82461267144	0.183841848172	0.0151348272758	0.0973028328733	0.00749030659806	0.238247711936	0.126456132965	0.148764403986	5.9388414623	0.105936930714	0.00533087469713	0.739719981755	0.186033908045	1.10970320759	0.376705173195	0.550767338236	0.271577031837	5.96749203657	0.489892855979	0.0429391850721	2.0177735687	0.100760131509	0.00228247534875	0.127770194912	0.0674968229147	0.0482518157879	0.663323942672	0.0259045664139	0.0192283140884	0.0831672717202	2.13993007807	0.0981383583987	0.272375096129	0.503217980822	0.0445620615219	1.1055058825	0.914517437438	0.0294231423365	0.0839525674073
USP28	3.14359418364	3.09324367592	11.0121779839	5.21137187454	1.42037350804	8.22814226274	2.16946250637	2.88452066428	4.48018545314	1.98633481407	1.87417331468	3.8547228372	2.18359434073	2.17119292784	6.04661974404	2.2821206343	3.76133191081	3.42944149433	6.92961532637	2.95259357426	4.3033982354	5.54795073859	10.9182443062	2.69644288349	4.9269617298	2.3806405206	10.2782838729	3.55359140907	6.62572749662	4.7176871389	4.11440388912	3.20979874394	4.78580363484	8.12010770001	2.22600703505	2.47261960146	2.54021377959	4.28387575833	2.07894644619	5.45249480298	3.12556132343	4.52271244485	2.19706870226	3.57154387652	4.98678376499	1.86003630136	3.7850894146	5.29286503001	3.63156929667
PMFBP1	0.0155160158236	0.0459378707438	0.200329653314	0.116997078396	0.22335246014	0.0466401095024	0.0952167992326	0.115948505915	0.0886833770031	0.137095307629	0.109038619661	1.34736983068	0.1487005423	0.319386352047	0.0596697487137	0.0851641456801	0.163592070908	0.0306490421314	0.0714226602535	0.147351355662	0.0884732235361	0.147320089145	0.194999335403	0.144133484848	0.134269901666	0.29628619048	0.0885049334979	0.248484361586	0.364495451921	0.195036959154	0.128559734924	0.0891868510144	0.0545483934691	0.100634977459	0.106850126463	0.0320322193018	0.0761509343662	0.160504226177	0.0765888989203	0.0596875963582	0.190454566177	0.145811144978	0.223642853995	0.0331303019826	0.0769151674429	0.0419369051294	0.173459190132	0.0901509523113	0.156876242374
ARL5A	4.93048202346	8.92980906778	8.08223463748	4.87206773512	5.24616903911	11.9412500132	7.78468759526	7.59645990234	5.86682327433	15.0605041782	3.42149184512	7.39437863626	4.14456833556	5.81726992146	9.05918901192	5.15473871634	4.51624190744	4.98650240676	3.87038768466	4.4553211028	12.3881066507	5.70639261598	5.33444693975	7.90625388192	10.9681555987	13.6030135531	4.38872835974	5.63399811078	5.39450330631	5.67767045869	4.47703614455	4.10624707996	7.20568087564	4.21263469952	9.95092329091	2.3692347696	5.63925010119	4.40568686142	5.01171099712	5.52565077621	4.48444967905	2.05578415085	4.94339752967	6.94595945929	6.69060073316	6.31787655844	3.6903920514	6.16738557961	3.23588599574
PRDM16	0.16273468096	1.56318761834	4.62802338573	2.73334978422	0.156577332312	1.18410102926	0.868558012776	0.0675604532774	0.0384548518928	4.07079664235	0.127068451826	0.0597343894758	0.210756382525	0.0313649792324	1.27483223754	0.0212670575728	0.067728243978	1.76203593174	0.093636665187	0.0234158594824	0.0164964018477	1.25517057843	1.9486087729	0.0130640493178	0.00782358974484	2.03677239621	0.00763996035838	0.0248204508204	0.00366177384239	0.0437090097165	0.0241641026713	0.0606282479072	1.18837066179	0.0100521638179	1.06242043772	2.39704440144	0.727304288795	0.67469455944	0.00247925226531	0.0330396237668	0.171008148877	0.00361534923752	0.0526790781804	0.995777239454	2.63211631302	0.0855247511846	0.0	1.55135140667	0.0120273786509
NOP56	16.858776662	7.2550160941	18.8166601837	11.9059807545	11.9099289655	9.33208714159	21.1051032351	9.86622559496	29.6168226777	12.8840062124	14.4846029726	16.6548971452	23.6005285205	15.8978392317	13.299923271	14.8148222037	12.1320255899	24.5576159809	32.7514900085	38.3042421202	13.0473760627	26.5073544022	21.1511440576	17.1981508869	33.7191123513	15.0734376102	26.0401018155	17.1591617019	60.7029941417	22.7609332004	20.1339327824	27.3098685292	20.1761602978	19.5946703914	29.7795417132	15.8047848281	20.1409021244	31.1237110871	47.5639361706	11.3237858192	25.5598746619	26.8136836784	23.3173393169	11.3867215336	21.0834191661	10.7090719548	26.5233256727	15.4320243179	16.8655688486
ACOT4	0.336458431189	7.00990124986	2.05583382814	2.06050083219	0.243847022313	3.41137253087	4.47755267758	0.867505545757	0.521761173474	0.198190363011	3.16057138844	3.38749698034	2.03347489654	1.82438920989	2.2403881233	0.688866886237	0.0933533388277	3.78254422489	1.64341817665	4.2845446468	3.41067647854	6.53902024696	2.09857921511	0.270102814747	1.16463507086	1.1847230744	2.64580123781	0.675673373902	0.666232000516	0.506069650349	0.78936716649	0.764041575498	0.876192230405	0.325602296672	8.56210805308	0.374866471609	0.606275034575	4.65443568928	1.05593999075	1.581923463	0.624379073705	0.179396016949	1.32991489291	0.804893112425	1.65361848754	1.48677159129	1.0000524498	6.48732664923	0.149201618057
DDX39A	7.47804565004	6.26348512007	24.4333429656	17.9957502267	25.3433608733	27.1847343873	19.5126976093	20.4262673542	42.1161659434	26.2954947901	12.1443827773	23.759551936	34.754340355	21.9385369387	3.60362161514	22.0787715003	17.0734828984	20.9045995458	28.8601700308	32.1861329574	15.0368510117	14.0024215188	33.5330657908	36.2330586465	26.0232036738	15.9479341756	37.9267174771	57.9117653111	22.5577417389	16.4358770692	16.3056413533	21.9047822207	12.6518393182	25.9894389311	57.6310859743	12.6006242175	32.1792689846	23.5153738621	51.3115339569	38.6919154418	49.4231965277	42.6400116941	23.1729907476	30.9699151091	18.2735831358	11.9242675254	24.1280378323	16.7676193321	29.7471865735
DAZAP1	8.4606815737	5.76793628386	11.3169162634	13.5253632608	10.497082027	8.34320389871	10.6820567154	11.9162523764	15.9059255983	10.3892245586	10.1654296933	7.32071466603	15.2130329304	12.0725485637	5.36688079355	12.348690052	13.2259345265	11.7070236057	15.508098631	24.3032349201	7.94350851802	7.51439410207	12.6520871367	17.6396953202	13.5431476408	10.5490814434	7.15093335445	16.0389080155	22.7935325047	12.3622223059	9.35732382138	11.4832699169	10.8284272186	13.3808360991	12.7999297218	7.93351490072	13.0244103579	17.0823962363	24.6833107959	11.8838899566	21.3642682179	17.7361507018	11.1162347012	10.2988096629	7.30619916792	5.75100319602	12.2959632089	9.68739539461	12.0931330267
KDM1B	1.54503859469	3.804377507	4.46142687847	1.67328737747	1.99689767751	1.25019346406	2.11050316687	2.66802153769	2.47259048699	4.0411280997	5.05810622635	4.4771935497	4.37027146022	3.7156576686	3.49187823976	3.65404227012	3.72166386761	2.47158233536	1.74263052932	5.88140058003	7.61333133411	2.27059959521	8.15500800589	1.52330429845	5.562600402	6.23825899246	11.4121542066	5.71541070206	4.77898383087	5.29567707952	2.93280003355	6.06914741945	2.25572940693	5.19208152649	3.12056902631	1.84193974864	2.39066666073	5.67254944341	5.44900152537	6.15050089766	3.2443416736	5.52528670426	2.16284950768	6.64727244189	4.02294459926	1.95144877429	3.41430539183	3.59152957684	3.27743948068
C16orf78	0.0	0.0163191274908	0.0	0.0	0.0	0.0	0.0349915281178	0.0	0.0	0.0146106628412	0.0352138681473	0.0	0.0	0.0	0.0	0.0	0.0	0.0	0.0	0.0	0.0	0.0	0.0	0.0	0.0	0.0	0.0	0.0378310460616	0.0334874017965	0.0479669548204	0.0662951659525	0.0528050737748	0.0	0.0	0.0	0.0	0.0	0.0	0.0	0.0	0.0	0.0	0.0	0.0	0.031527241279	0.0	0.0	0.0	0.043996781754
FAM19A4	0.0231156141498	0.0228126023039	0.0	0.0	0.0173306453242	0.074447138139	0.0	0.0378813577639	0.158748427841	0.0	0.0	0.509097541021	0.0	0.0	0.0	0.0302087480096	0.0	0.0	0.0354682687175	0.0249457569333	0.0	0.243862311612	2.38862274915	0.0	0.00833475142211	0.0	0.0	0.0	0.273071352345	0.00745036471032	0.0102971549211	0.0123027527905	0.015049200467	0.0	0.0	0.204519850464	0.197302511941	0.0	0.105649462807	0.0963321867663	0.00775238846533	0.0	0.0	0.0137103365753	0.0	0.00743776262439	0.0	0.0223843398605	0.0
NDUFAF2	25.7003807585	11.7563187	26.1571038972	24.1148004697	23.5909447455	33.2019107543	21.8089085838	24.7068696512	13.0181868042	14.6989302084	14.5330438488	14.068655604	27.6844891399	30.0016111263	11.2414403582	23.4198888404	16.5501914996	38.0366767993	17.6854831937	16.472441242	18.5953804177	7.67593193156	13.0942916552	16.2385857755	19.6292001191	13.0168994748	18.6365301636	11.6602202914	25.7244491192	10.729316372	11.8353493907	23.2903086454	19.2983133634	22.847405325	19.5191765324	42.2257407946	34.4980629064	43.0796420575	12.2145738221	16.0655944278	13.1035946626	28.4016645923	42.4170612557	10.011214969	18.8882585524	19.7125721491	17.575790816	18.3628182238	24.1873281073
KIFC1	2.10656841703	0.349097604404	11.1148421436	8.06636269557	5.46249506074	6.72215741468	2.30146969153	9.66096251015	22.793564515	1.12891284762	0.691455093468	9.70922826066	18.8785962492	8.95061302782	3.21476345723	9.45948336327	9.27999478014	11.8773819126	17.3340586496	17.3264800542	6.2376939347	8.44943177311	20.0881407284	9.6834979429	18.4921746906	5.2982563162	16.9817904064	23.891849366	31.9475219176	18.6485769212	17.7660738778	4.99891188988	6.97073566814	15.8985213269	34.8565669541	1.82178578906	7.22150787427	5.12012080255	37.2380340109	25.3060633871	17.938456778	14.4200252496	1.84579930614	27.5865005936	3.976108223	0.779744348601	34.4545567441	3.80888447289	13.2677720991
ZNF81	0.0815767901465	0.423180122331	0.88771105636	1.0383473386	0.1387888491	1.31140298892	0.314264786701	0.113119127318	0.335029157894	0.689371324418	0.25612740056	1.19940834359	0.10835840805	0.149971879143	0.995454028575	0.262422173874	0.417862060995	0.199703393909	0.483831210826	0.343112739684	0.469926422757	0.876055785981	1.92558437054	0.621779869541	0.230786631111	0.752105240584	0.691575898755	0.815919282429	0.334643973039	1.66049860086	0.897305031907	0.581124746518	0.220609906834	0.784924217769	0.906086688281	0.231335375095	0.220940021218	0.363201882415	0.854675749004	0.834822195978	0.347246034564	0.411956049542	0.237345326165	2.90122933437	1.45962575969	0.296809278036	0.467680327391	0.437516676672	0.851504219559
OR4F3	0.0	0.0	0.0	0.0	0.0	0.0	0.0	0.0	0.0	0.0	0.0	0.0	0.0	0.0	0.0	0.0	0.0	0.0	0.0	0.0	0.0	0.0	0.0	0.0	0.0	0.0	0.0	0.0	0.0	0.0	0.0	0.0	0.0	0.0	0.0	0.0	0.0	0.0	0.0	0.0	0.0	0.0	0.0	0.0	0.0	0.0	0.0	0.0	0.0
PIGBOS1	9.29774969633	9.33560449314	9.22329011949	8.44315015898	13.0653299632	9.86573676783	9.17148619063	9.95559114727	5.33071818174	12.2195728169	7.5446608989	7.55381067776	12.9963717376	10.0658118158	5.07180711368	14.2777863683	8.05857539924	10.9532872615	13.2660354603	9.27697644195	8.98303415206	6.07122789642	8.32494260453	8.53861246084	10.4464820665	9.16989518169	18.7498572845	13.7010025922	10.3797305079	4.22558587332	12.7859206416	10.8254703077	10.1335676326	8.23161322141	15.8403083659	10.6343379952	19.245333055	8.00612895815	7.86612967742	4.51410544492	18.4560528002	13.2326789094	15.5253950777	13.3440388254	7.01195382767	9.53054604111	4.70313750677	7.57557180168	7.60812780368
INPPL1	14.7751856901	16.8406486549	33.7593041941	25.0429922158	10.3371836178	12.4533385064	26.74267391	14.5412673422	13.5898061825	21.5380400143	12.9861226521	20.3603873918	15.4443086072	11.1684649636	20.6410168656	14.5508018254	29.2580161312	16.0715603202	33.410799009	19.5234011824	21.8114304213	38.782599147	40.7903806515	17.3836450319	29.1076215412	25.9039119369	21.0672152992	15.6649778812	36.1568084989	33.3247236269	24.600296417	21.9345909719	21.6168433042	28.4819400995	20.3137011641	15.200268336	21.0188463388	18.2303588134	12.1464307382	52.6796462792	16.3184316626	27.9390606447	10.8086651992	16.8038629739	23.1007771913	15.3737355463	25.5479922968	16.5113813166	18.6685654158
SLC25A21	0.109014377842	0.350520040657	0.00420400628718	0.11364232346	0.0632765258192	0.449252357032	0.159991132744	0.0138309951405	0.0490800434785	0.114965143933	0.0748873181628	2.16304906759	0.0136629336793	0.0	0.163411583333	0.0	0.0146356422615	0.185236902981	0.161874296895	0.102465367189	0.00802072664507	0.834725833654	1.06068455702	0.471853958561	0.0608626053667	0.0178593413451	0.18944614366	0.128724993051	0.762008428453	0.00680057185028	1.29237290855	0.101067775612	0.288469978843	0.0325831289026	0.0312474952635	0.0518562212114	0.0262637851916	0.0844468919986	0.192870226008	0.0642568708344	0.0318431440189	0.0140625710884	0.0215689516271	0.122017081421	0.284950514069	0.0746797575811	0.0	0.272427489501	0.0982437097948
SRSF4	31.2621690526	16.1173620087	46.2856108969	34.5663993144	23.4788151117	34.4262138886	20.9600879993	30.4313075115	56.2339354605	34.6855437922	22.8250932475	42.6781746822	32.0350701541	22.9860148727	35.1797678278	34.9209616387	32.6928527641	44.5096306661	58.944707538	43.0838588348	32.3223725747	31.9034250722	56.9862754918	32.1771709727	53.4691205694	31.4877767069	52.3713073157	33.4485578802	58.1563506766	37.0993876177	37.4655130994	42.0101334635	25.1430428771	48.4479528151	67.1843367295	6.93802793902	43.0988191769	56.6201973387	71.6315144405	53.78958005	44.6689740439	42.2256111179	14.3423909395	33.6973624259	35.011285387	27.4283076748	42.9581360179	42.7193095143	33.3643369437
ANKRD42	1.38151891206	3.30224971387	1.20257212923	2.04411678678	0.918611834832	2.67019135538	2.06196061914	0.878054267645	0.726152736419	1.92151510903	1.04592101293	0.747854639698	1.01024837014	1.00838252744	2.54618067938	1.37467774144	1.00929774619	1.44401931859	0.525915723925	1.66379740041	2.53996993243	0.65668740391	1.63666474465	1.6238281899	0.653442528209	2.25424516177	2.62178096056	1.74256864756	1.30845896775	1.06662984604	1.79359777059	2.94392212906	3.47030892232	2.82779497369	1.08230119293	1.01860456557	1.84949097674	1.40212639314	0.223277978327	1.03814208484	1.26577918198	1.42840921368	1.40554086109	1.43240392972	1.78270513864	1.83302133389	2.10254130549	1.69642935468	2.45984148505
ENPP4	3.53130642135	10.2377034044	3.43174904281	0.681707337029	1.63977490947	2.04226219327	1.90832102926	2.07586256844	1.56461576698	7.67963580649	1.98109239721	4.73091520873	1.7752530861	1.18558407631	0.584098972143	2.64984824295	1.66986038512	3.38355057218	0.179156318422	1.69236391672	2.54619355584	3.7814964724	3.90910777997	1.81849704624	2.04956393883	2.01324349975	1.34366427084	2.67561720398	1.60713608467	1.17855767126	8.18502269503	1.81276605232	0.378226433237	0.96399264024	3.78731937351	0.968673320271	0.818353635315	5.52008060306	4.54516664204	5.14526009699	1.71151935378	0.151843113321	4.10476719658	0.405384967928	4.66588258022	1.4844501255	1.25831570532	7.77313648063	0.747614202448
RYR2	1.63917101858	0.0186278750657	6.70774093239	3.90597941481	0.0290478656736	2.29617861933	0.135592417502	0.0322348470026	0.337384230926	0.245776712382	0.0126933941097	7.05064440017	0.00771955368594	0.00229766366401	0.964663175252	0.0194741661804	0.114389683698	0.602878284798	0.0148620764852	0.0139371805064	0.0192597602688	12.1007175952	3.85582583591	0.253267486179	0.685597888595	0.0373349344963	0.30327155067	0.0806843832132	0.0362131862595	0.0124875438437	0.00132761878152	0.0222068251977	0.00776121223385	0.00276141879983	1.59886518281	0.0175792502396	0.167469066922	0.0110105700525	1.02433326041	2.08754405203	0.00799616329529	0.00794534870965	0.00152330645034	0.0556819980909	1.311651706	0.322209048219	0.41052512469	1.89034786854	0.153306893681
HEXIM2	1.57712459092	2.20639728426	0.932348754504	1.50907860637	1.01351110516	0.976799054876	1.58615669803	1.02246208434	0.961777568679	1.04895669493	0.894998990331	1.10419852196	0.718249294733	1.06222524466	1.48573428903	0.611527040178	1.29833515002	1.94945252687	1.17671811632	0.907105080871	1.71951313121	1.57239738196	2.1236460988	1.20745386988	1.53725860773	1.98919061483	2.35245457002	1.80408425154	0.76337473634	2.27068691524	1.4823052611	0.927016648436	1.03241355039	1.90288990106	1.39561540579	0.472797442992	1.05399040604	1.36060409102	1.15252262851	1.22505569918	1.16829026721	0.623748859717	0.318898748983	0.701568282674	0.966515692163	0.727732884374	0.761160715088	1.92162638108	0.403483734535
NFKBIE	3.97545574245	7.46853310545	1.69325515376	2.96055644599	20.0225155548	3.34963086316	5.01706116945	15.4608072409	5.52523336644	15.7795158685	6.61535012643	3.26690881792	21.9324229653	35.797238455	1.52401185103	14.5800456463	4.1766868129	5.21116048673	4.28356643877	15.1154083046	16.21503785	2.90907612735	3.28923685239	9.97212356215	12.5529300426	15.0953768132	7.89995211667	4.1405427655	4.70440258341	3.0765012402	5.83397460382	6.17273103781	1.51014441075	5.61713953456	3.05520235993	15.7504321156	37.2175527551	19.4774303753	3.0585212481	2.78352446532	17.1488840128	4.86365817087	31.5913732312	29.2264748078	4.48121684662	4.9933351658	13.1132728317	5.47305348692	9.63984659535
TOMM40	10.4298675559	9.25514226678	14.6501001478	15.5588775364	16.2078307394	18.7596339389	12.5467019003	15.8928938433	14.0780676197	13.2527535029	8.11549925492	14.6029603135	28.6435418772	17.6337440719	6.9609307354	22.3922135419	12.9083445726	16.2505551301	18.0376484189	28.4241766957	10.5721286781	11.2973505399	17.3941432796	19.0107275374	21.6856286879	15.8708377551	14.3761377442	8.9369087034	20.4680194502	23.4762766901	14.3698536886	17.6998511609	11.1552094243	24.9437534858	5.41195365404	13.5188565385	19.0407308366	14.5219755514	14.1398665632	14.0812819646	26.1998861584	29.9851041847	15.3102244058	8.93105756447	11.2299160105	7.31950013834	22.6084954606	10.5925920557	24.5485954722
ZNF550	0.843613131145	1.12035124993	5.85190733234	2.60219027764	0.925307240287	1.85604164485	1.13501318825	0.747571132961	1.6981593049	0.797540565704	1.26421040142	1.64388366598	0.638448720078	0.509867014281	2.46991939796	1.49719472148	1.47376055329	1.33723692786	2.10544300627	1.52108800248	1.38965120044	2.29271799884	3.91947130846	1.73430143302	2.86529977354	1.53390923225	1.08914828817	1.83074895482	3.47662031869	5.44143471986	3.85541511986	1.04210870187	1.3323823094	1.60512294478	1.38045807437	0.296922993701	0.640796825443	1.10302088518	2.30867025448	3.17179089179	0.443600598397	1.68329971117	0.266166883898	2.14353444592	1.86657134253	1.30695247782	2.52964160486	1.45903476973	0.882132447065
SFXN1	1.66994132523	13.0624141322	4.00669448338	3.32680697977	3.32326796871	5.65120504295	3.76572060206	3.5958833832	3.47216028666	3.9979034012	3.02228185471	8.57828011936	4.84197263861	3.04237978905	2.72071043613	4.85546978111	6.58447339824	4.05422226406	2.44244840958	5.4316387751	5.47653880656	4.52244138351	6.49010040422	4.97107607733	8.37848575168	2.09654798807	6.39813863095	5.41595490646	14.4720768943	4.35024552061	9.42858745566	2.81159820309	1.93144920858	6.9736131999	4.91167542625	3.16413348507	6.33056522465	4.23075531683	5.0047875079	9.24794864722	4.6838186513	6.27457825962	4.18428261467	5.25602374495	3.89761141254	1.90240522783	4.59086136672	6.36907191531	3.95294698571
RWDD4	2.3729476929	5.12944978634	1.91655437057	2.01019187722	2.96196710742	5.03347756696	4.09249618771	3.09013627993	3.79258509296	4.27203991892	3.12274451632	3.18754479845	3.02375093997	2.77355524893	4.58727314386	3.34220185832	5.26010044194	4.36338503566	4.53174849662	2.83544112993	3.01084960785	2.30203913842	7.10245039718	4.41256148772	5.0097860911	4.37463022214	2.43938003366	3.47127103412	3.65246705372	3.71543461574	3.33271721866	2.88480052896	5.96416728593	3.15947426927	4.19022326547	1.99819430269	5.68801251013	4.87692033421	4.70165989041	3.57302508557	2.71391683347	4.15312657599	2.1460951473	2.9261987157	3.03840380704	6.03658031419	3.96244275325	5.23645183913	0.939432723951
STK39	7.31030344995	5.28979503143	9.27121474121	4.96459347376	2.53464054427	13.9772237649	13.819420806	9.11785639503	21.6530506729	4.98951899876	4.23725565111	23.5137853436	8.26118813327	2.6688591547	5.29053741276	3.8067290269	6.02262020534	7.39713825983	9.45582206708	7.9922986407	11.1630951264	4.49655230099	10.5260361172	4.42933364447	7.4442851847	4.91212710288	5.44667830805	4.93271589475	9.5074573673	10.5505163748	2.41734622072	5.85602921757	5.4780719705	15.0108810023	4.01826823215	7.5361094385	7.20509563973	4.95443893595	16.2211603038	10.7695305461	6.70658450745	12.8124393126	4.84592942395	15.7157452787	5.86687292856	9.37664566056	5.08869102465	6.89783420635	5.50984326132
NTNG2	0.848686311324	0.111082397452	0.0511329345966	0.0484989801074	0.260761595	0.981190188932	0.126237122854	0.148303704873	0.110713638641	0.83142773081	0.18216948692	0.0478087229181	1.19533688992	1.59060812043	1.37073088138	0.0882580630184	0.218611161274	0.597840593474	0.388591165873	0.774975155738	0.765039297963	0.149618620555	0.106093806671	0.278823424609	0.94724848323	0.637945234254	0.135542099769	0.141631334969	0.123090212645	0.0935982338292	0.330926539031	0.283956002838	0.241823098899	0.214839321286	0.100015883501	19.6187849927	2.8773974619	1.61760946648	0.413612596723	0.207836090784	2.34421554687	0.522127400425	0.431482134604	0.562789655321	0.0729647664323	0.545428341072	1.77064355326	0.462147451693	0.122787194356
OR10C1	0.0	0.0	0.0	0.0	0.0	0.0	0.0	0.0	0.0	0.0	0.0	0.0	0.0	0.0	0.0	0.0	0.0	0.0	0.0	0.0	0.0	0.0	0.0	0.0	0.0	0.0	0.0	0.0	0.0	0.0	0.0	0.0	0.0	0.0	0.0	0.0	0.0	0.0	0.0	0.0	0.0	0.0	0.0	0.0	0.0100691069635	0.0	0.0	0.0	0.0
FAM229A	0.620749708627	0.477837819506	2.0333322894	3.1761930931	0.523574328862	0.879653777041	0.735596946809	0.427253781345	2.42168796202	0.499114622217	0.766709261342	0.488263270575	0.691378061233	0.430708966134	0.487388589823	0.486737788667	0.852550597336	0.912820762942	2.17877398327	0.723488329027	1.7131426343	0.609030051481	0.780134423747	0.820103485808	0.99377189399	0.491795413311	0.570465366904	0.979910525966	1.01825242693	1.02037262064	1.11161497244	1.03078473714	0.878989680701	0.235814812207	1.82021876979	3.91777123274	0.761643176587	0.733862556806	2.20444566984	1.43275407047	0.993036001281	0.7136693041	0.333143640377	0.110453748438	0.834380353202	0.443410911493	0.929408973487	0.745378847461	0.528518106582
RPL8	684.965561567	349.634078947	444.47769903	776.412933634	839.7884877	513.356246693	526.161887137	761.920441328	471.14376858	376.878359794	1013.72871371	334.357701027	587.811415739	1052.17537239	375.992255999	522.110510586	345.781141757	1018.7058543	817.921768809	1113.56181264	459.657572001	314.450183531	422.171122528	906.971580664	530.564240532	355.617858536	774.838237454	133.833274327	686.326424772	835.976264543	619.082867757	449.716819927	619.61567725	1066.30923149	397.136708613	2895.95472852	938.375453173	1123.7758223	629.171295106	428.945031488	543.366365372	366.489804258	756.152827343	520.491533859	411.312917706	460.207438715	626.615278587	524.938627323	526.570071981
YDJC	4.43018520672	8.02878743069	4.62212515194	9.24613769522	11.4817402595	10.9064067009	3.84575646601	13.6225681944	3.94137772839	2.57993984901	8.55516309085	4.56172626429	14.4350218551	7.95254339518	3.04925513335	4.91458784465	3.29647398767	6.55221420058	4.56521509818	6.57379006256	6.16602277839	2.92106451936	7.00178799512	3.62691014991	9.02884519105	5.21570150969	6.85997332797	4.514878683	43.777923814	4.73149980342	5.20730764174	8.27931775302	4.40500565185	9.83287496634	11.0044272003	7.54243711547	3.07236231964	5.78426027072	5.39795270139	2.80809042627	14.5369217276	3.81496948834	10.8844197442	3.56521903915	6.86283693998	5.67597122582	11.8791607828	5.76229570763	4.11216898928
PLIN4	51.6719898819	1.69313328287	16.5743766662	7.4502839119	0.0219250018594	23.0225318953	15.1935521736	0.0109539911048	6.49142980355	0.0639818460454	0.447789787761	14.0532002298	0.735820406836	0.138492302402	27.7494585145	0.141949196608	1.65368678164	23.9405076743	5.00951679469	0.216403752939	0.0381139465809	3.32603426073	13.6070619275	0.287463828793	8.47158803495	0.0311176702283	0.0853164048174	0.242128240556	0.445576259954	1.06642318605	0.0930495153726	0.111172959296	20.1701911023	0.033547108556	0.157766341702	0.550331814411	0.0861739957136	41.9755317325	0.0420065329803	7.35772558407	0.128899198971	0.0167060949391	1.76802475475	0.438579418325	9.11737389351	0.491983189422	0.189037964581	3.70027505386	0.0852181790732
TSPY1	0.0	0.0	0.0	0.0	0.0	0.0	0.0	0.0	0.0	0.0	0.0	0.0	0.0	0.0	0.0	0.0	0.0	0.0	0.0	0.0	0.0	0.0	0.0	0.0	0.0	0.0	0.0	0.0	0.0	0.0	0.0	0.0	0.0	0.0	0.0	0.0	0.0	0.0	0.0	0.0	0.0	0.0	0.0	0.0	0.0	0.0	0.0	0.0	0.0
CSH1	0.0	0.0	0.0	0.0	0.0	0.0	0.0	0.0	0.0	0.0	0.0	0.0	0.0	0.0	0.0	0.0	0.0	0.0	0.0	0.0	0.0	0.0	0.0	0.0	0.0	0.0	0.0224757508495	0.0	0.0	0.0	0.0	0.0	0.0	0.0	0.0	0.0	0.0	0.0	0.0	0.0204627777635	0.0	0.0	0.0	0.0	0.0	0.0	0.0	0.0	0.0
DRGX	0.0122216811145	0.0	0.0	0.00548550315661	0.0687229049879	0.0	0.0	0.0120171725944	0.0	0.021597491923	0.0065066455331	0.00480660555289	0.158282013697	0.0353335354282	0.0195836528218	0.131768677304	0.0169550623845	0.0	0.0	0.0659465685019	0.292692689772	0.0	0.0	0.0126145891929	0.0	0.00620689358029	1.21353500434	0.0139804696172	0.0	0.0886309822633	0.0163329266983	0.117084744896	0.00596760682877	0.0396341630948	0.0135748201742	0.12615595851	0.0325992904677	0.0451522269488	0.0	0.0117537062586	0.713198278912	0.598700582748	1.33056548963	0.0	0.00582544873459	0.00589873769381	0.0	0.0	0.00812950915455
IK	27.380622686	20.1429097726	36.8296747368	30.10038979	20.7577391937	36.4884861076	31.9846822779	25.930664997	23.1878022799	24.741226432	21.709517316	32.2102405308	32.3453564006	23.4186567677	26.2469703794	34.8473724196	15.8290633245	45.1846926111	20.0306463226	36.8099516243	36.3425310643	28.5719012582	29.4296761806	19.6206587509	36.1455689557	27.2505807445	43.2700171022	29.1759638657	32.0763536828	27.2294481913	39.6788461549	32.8092345837	38.2518645353	29.03607716	26.8404048182	26.2646684931	25.6444144566	43.6744751229	19.1555653241	30.3201727964	31.5296091325	50.5965112265	28.9503554315	19.6621084653	30.4699975203	26.2555017599	22.5198569421	49.7771552764	20.4148503748
GLT8D1	9.63290684206	12.3951191078	12.4108835699	11.4040332772	21.8845423446	15.5846985001	10.2063925424	35.8116039545	21.7778530411	18.0826876291	26.7177221416	12.0997211832	13.0537189577	25.1738447002	9.15578277347	20.244643961	22.0475560708	15.0302114733	14.2512336976	39.5187674597	30.0866345617	10.091042382	6.44704103792	28.6221839706	17.3763476569	21.1077493963	32.460241578	11.7568573602	14.2701996292	19.0777661217	33.4308441399	25.4688471738	10.534563303	16.9022817849	15.2426754103	17.0910212797	33.8306545759	14.728435051	7.32134589897	14.8936206428	10.9215316115	18.5572718932	12.8069010107	25.6745098396	11.925895542	27.1773795022	20.2476507423	10.105511977	22.4323591334
TAT	0.0	0.0676910285489	0.00390466424528	0.00879587800403	0.0	0.00350641844141	0.00345579360365	0.00321154325855	0.00217073087223	0.0144296170838	0.0034777520974	0.00256909377619	0.0169201042938	0.0	0.0	0.0	0.00453117535522	0.0	0.0	0.0	0.0148992377331	0.113709202892	0.0239448508861	0.0	0.00706611809117	0.00995261093788	0.0	0.0373622685351	0.0165362239313	0.0568470957072	0.0087298239612	0.0	0.00956892014156	0.0453946199414	0.00725563719315	0.0674293915467	0.0	0.0181001390626	0.0089568547717	0.00314113289138	0.0131447933143	0.0	0.0200331561071	0.00581174245063	0.0155682881847	0.0	0.0	0.0158143477469	0.0782128844497
LRP5	10.4317421569	12.5089448054	14.6287428782	11.9464095797	2.30056725383	13.253603544	10.2157777694	13.4095581666	5.85905019453	1.4302995087	14.5607516684	15.5609955841	0.619659703685	2.57769720077	20.8656926506	5.38608646739	3.92303119708	9.28461285	9.10329022215	7.72978516266	9.99487288271	8.20928211048	7.86156713872	8.14408438205	2.84503305292	3.14000946145	0.650681008937	31.8528692705	36.9481867806	28.2627772251	22.6974686536	3.96161413639	19.0986072966	0.315903055297	7.58975375353	2.31946214577	1.69349188826	15.7184908164	4.46662755795	5.31786562287	1.17610926994	0.0630146456898	1.39704451138	18.7096715688	8.72640690514	14.8984563391	9.15135117308	18.2752229152	8.78558059013
LY6E	22.6573996348	78.858845596	79.0439937392	76.8695401036	125.454808437	126.409059785	23.3497671868	157.447561465	2.60528981444	145.260803857	376.490111707	32.7913913554	281.114612035	539.308465961	25.0504962694	45.5295265001	61.1759202425	160.468334655	36.5511794492	85.4675271511	148.555715382	62.9928126892	39.9829111735	180.927516887	81.4493124699	52.3665031437	106.113723834	130.944255815	161.434924964	64.7797358709	19.2205757652	35.8882483218	60.6759136864	301.629192539	23.59817944	107.976461638	51.0742962331	352.656465922	2.9993402266	72.43335012	177.967423899	45.7640088651	102.810993754	49.5703139252	43.708650781	55.0099966421	133.183296694	50.987490238	54.2504317272
RNF149	3.31587653496	8.5594431101	5.31742118308	3.53711731768	30.9125602541	4.55162043823	10.3975632664	12.8727997561	4.54583677427	13.7714379691	9.48375877495	4.57004223866	14.2073490367	10.5576837663	3.13061050562	13.2077068919	8.31867389768	5.93515067268	4.7740465715	21.7935954059	17.4122263227	3.814054963	4.22616503187	11.4547434502	10.4285733426	9.77015875217	7.26753124862	6.48746115819	4.68873482324	6.57131411079	3.83102710444	5.78418654271	4.19747594216	12.211530114	2.26739637506	6.39746212145	25.5595694129	11.8860249702	6.77975934846	2.03696882038	13.7525640072	18.9698675301	27.0574202411	6.67339576078	5.7232504156	10.2403964788	12.2330156951	5.26204173952	6.00474191076
TRIM59	0.646684655131	0.290295802795	1.05495488781	0.769979119496	0.694437746207	0.61710824606	1.77470446067	1.64264741422	4.52622392355	0.261888468493	0.583372684567	3.88915197526	2.05016966819	0.47778667004	1.05062002182	1.28088932469	0.875336084671	1.06696986038	2.66929274867	2.7745771456	3.44928672396	2.60574553946	1.47918462807	0.737003163388	1.53506092358	0.53825170979	2.40746297561	3.96073014576	2.49646983727	0.974854408939	3.97002258381	0.168506260852	1.89458048915	2.8003726526	5.34971322318	0.341048444007	1.59555393096	0.601431681593	5.79124549046	3.07074355794	2.2885523877	0.82609603872	0.268560186127	1.39240888284	0.911880858882	0.453006554919	2.60438553199	0.939339682427	0.914081389159
BAIAP2L1	0.555796104789	3.34918290198	0.17161072601	0.191638190728	0.596075951225	3.19279642482	2.14972546066	0.119432862686	1.69770246506	0.351240578314	0.705451647837	0.243195407257	0.486227303016	0.212826005393	0.171040635993	0.447351388824	1.64933744103	0.214081238358	1.66466526974	3.08639012022	0.113334973813	1.37849804409	2.30906971464	1.06374797571	0.215001149231	0.257965120643	0.0466566232724	0.922090352798	9.00822275445	0.320312887129	0.39843422372	0.840412889451	0.161752244285	0.590004541253	4.77921094462	6.17674387343	3.64830767156	0.509938786534	0.868060730003	0.350443194837	1.08136609293	2.84078590603	0.299130970132	0.144087122024	1.17547065285	1.20447109337	0.139611510523	2.84789639164	0.421114673879
RFC5	1.88072450194	2.75728460275	6.33570532005	7.51424449025	2.89753027475	7.49848501042	4.480143372	6.22118927682	10.2234876479	4.80756912967	2.52343294476	4.49782293948	5.12484909597	2.71549475601	5.14753511589	4.46459075616	3.94383935709	10.0033700228	11.7035789263	6.27659506859	4.0168510017	11.3655899549	16.1559740231	9.02146964147	8.16106843957	4.35611597744	13.4873183006	15.687623084	7.41929929515	6.30175649841	5.28826887337	5.23340700696	6.86351928887	13.7392855431	10.3421202693	3.00579343171	5.16150415587	3.35361946635	10.8590478508	9.17946732372	6.78144297001	11.4334546122	2.43376641434	6.90575601151	5.91239118123	2.7598975432	9.21267705594	5.69001789516	19.3869401617
TNFAIP2	5.45717868225	6.78230596729	9.62217038459	3.11766155841	11.8715299546	12.357978205	15.1482771352	18.6113242415	5.49631517212	10.751344427	133.226057903	8.11809776311	64.2173640536	29.3691728195	3.70259155687	50.6862905721	14.4886048406	5.53395708078	6.51041265817	43.2256742765	37.4767423784	9.68786553742	3.95364157591	16.0569497972	14.2904011685	10.6757211939	69.4522153546	31.4776570064	18.8210118625	25.7484782166	10.8173567861	91.1932388968	1.50207120223	38.1147503044	5.54651118427	3.56792043497	6.70667685499	38.5385120837	0.818557500259	12.4721220467	95.223335165	23.206052573	21.350463594	22.6760842715	26.5639419763	4.25421091242	18.3814141567	18.4992837452	13.8564404057
VWDE	0.00544232024975	0.0698227322288	0.00325308468016	0.0	0.0	0.0350555399311	0.0115164721201	0.0	0.0108509785758	0.00961737313675	0.00289741226359	0.0	0.0105724580797	0.00629361586364	0.0	0.0160027235219	0.00755009711731	0.0	0.00313148196843	0.00587320748754	0.00930972786091	0.0	0.0	0.620709705057	0.0	0.0221114606435	0.0	0.0529168314557	2.12713627362	0.0236804504229	0.00363652990433	0.0173792970081	0.00265737807937	0.0100852063697	0.0	0.02407598856	0.00870988746857	0.0201063075319	0.0	0.177953648224	0.00821347042953	0.299246745787	0.0458979979115	0.00484192471965	0.00778222504298	0.0	0.0	0.00527014966208	0.0217204451063
SNAP47	4.04738243911	4.52407879903	4.64603774217	6.36051593977	2.40262795669	11.2170491137	8.84578385813	4.2303643589	9.92840902802	3.05443678324	4.08948604867	6.34176816167	6.39922394417	4.50666893759	4.3737767111	4.11958257545	5.78618559823	5.94666409686	10.5817154077	6.07382929315	5.06561912197	4.75404017316	10.6645343978	3.26055498309	9.52259283451	4.66167893381	5.86012506305	3.93289945025	7.81330297994	5.62633426535	6.04015458498	4.14397847806	6.16466482448	4.13308770069	2.98705872067	8.14115405158	3.71693344645	6.34105729458	9.34369629277	8.18489341628	5.7166960829	7.01660853705	3.08249000867	3.93995067328	4.68222655359	3.12189347748	3.15585666447	5.0135342212	1.99951331546
ZNF841	0.601448114001	0.963525139717	6.88976321071	3.50935288368	0.806111499935	2.51639546717	1.53424015798	0.664294276051	1.93839431139	0.979129122688	4.1450838076	2.69267455791	1.31777991412	0.938485734797	3.12886198442	4.74025780348	3.02321774249	1.53253074885	1.59287026817	4.71240303123	1.78051712283	6.14082502867	3.79664206379	2.17274308074	2.34390241112	1.7113623235	2.10177367811	5.81973327903	1.57674341671	4.1704732923	4.29410815995	2.26267339215	1.36780276882	1.39700222173	2.46167505286	0.449527030006	0.676866816682	1.70455712839	2.64346932998	4.1955138257	1.35947272939	1.79562008132	1.08016072062	2.44458467275	2.6429491545	1.55482029546	1.48851412441	1.50791189107	3.18956655185
UBALD2	13.8766749277	23.4712098763	16.3660210166	21.0139643962	61.9147864616	28.4335315313	31.1944507762	43.5618159769	30.09071363	134.810805437	13.9801995933	12.6388048015	56.8420923054	52.335513586	6.45650256776	38.9153227281	31.6714809869	33.3144627156	36.6882824215	45.212372855	18.9968701206	17.1277379872	33.6565923033	33.3116412156	34.6239766806	55.3510183466	23.3679018278	20.314198066	25.733754501	48.9860857803	9.07531755351	21.2465049092	18.0813505604	24.4310476346	42.1784846667	89.4013893098	89.7556246307	30.5892518032	27.677972188	17.0597164755	68.789803083	34.3875642766	77.818688991	8.72599979067	13.0037501492	38.4964686436	35.4517717153	17.6250580023	16.0158568639
LEKR1	0.0474654968924	0.124915449992	0.0189146385721	0.0681731766605	0.120994671996	0.0815303544715	0.0837012901583	0.0155570815257	0.203996193717	0.075490606287	0.0572785334244	0.114493843792	0.0245888740145	0.0805055073474	0.0709867938693	0.00620305056781	0.0263394357416	0.0590336833121	0.203925068376	0.116106608511	0.0902170068347	0.173591863747	0.026512362606	0.0195965755783	0.099264335697	0.0867808468142	0.0434533867884	0.199085795168	0.076899219033	0.0458956349652	0.0338306096816	0.0505248331763	0.18850195446	0.140733895731	0.130044393588	0.0326635656776	0.027009338671	0.0526074817658	0.047726827742	0.13694405115	0.0541236452541	0.120213439178	0.0388171564491	0.0281527427258	0.14479595923	0.0397089365985	0.0	0.128698924466	0.0126290708421
CT47A1	0.0	0.0	0.0	0.0	0.0	0.0	0.0	0.0	0.0	0.0	0.0	0.0	0.0	0.0	0.0	0.0	0.0	0.0	0.0	0.0	0.0	0.0	0.0	0.0	0.0	0.0	0.0	0.0	0.0	0.0	0.0	0.0	0.0	0.0	0.0	0.0	0.0	0.0	0.0	0.0	0.0	0.0	0.0	0.0	0.0	0.0	0.0	0.0	0.0
PLXNB1	5.85713990458	16.898782631	21.8326836037	24.7235454101	0.877447385477	11.8141965858	2.7817995218	0.413915230716	14.9894865816	5.20567123785	5.85397543817	8.98432259851	1.66844171326	0.88968048849	7.6960656974	4.31095252907	1.89798100481	7.30374472969	5.94895026314	2.54557955267	2.53690482756	13.2808422123	11.1586020597	8.7441602775	5.20123427387	2.52675348555	3.1414093479	1.15818272445	6.24124934593	5.2335776983	10.0291855616	2.15257851444	8.57977910671	0.28076259169	10.0889519623	7.46509011361	0.710485676539	1.38762029835	7.96132148371	18.0485568313	0.575061073071	0.194096856689	0.959882613262	2.02918334163	12.1479549448	2.15609680798	10.2329204371	17.4917068663	6.07573270589
FMOD	20.5574768724	5.77626117575	84.5648895815	151.605485769	55.5925738828	49.6146916886	206.855558192	45.2272099497	0.510618858902	11.9694964092	74.0181252691	11.280740196	0.946655554122	26.9938603366	153.119019893	1.79894463374	12.953206648	65.4074232614	99.3816388959	5.57362067419	1.35078244788	59.0340705159	83.9514202212	134.524342007	1.00421919793	13.7108591514	27.6666986597	1.84318342485	237.520880082	124.919630354	196.894319544	5.0347324631	32.2418799254	0.0296614755315	12.8716362868	0.857582833193	25.7247008805	14.4386522709	1.28755734443	42.4038212125	5.7116787679	0.229362233856	20.2812298264	118.3007865	128.748700071	196.199054975	1.38466025718	4.01965937716	2.51977943115
PRR14L	0.972073332779	2.137094011	2.27054787529	2.92924660814	1.50020664163	3.19010410423	1.64718270231	1.96308131278	4.17643068452	3.03389071483	2.11465704331	5.42751202311	1.95423801659	1.655060021	3.30215643452	2.53289953334	2.75311935374	2.36654692396	1.78984255179	2.38211804949	2.69125162062	4.71101758768	8.55635006173	2.17026695111	3.34375631182	3.10180689617	2.68709791869	4.67194998291	1.9685794163	5.71907130561	2.25038657321	4.40077458009	2.7062028166	3.83134718273	3.26899234639	0.696869624557	1.55730142544	2.62990979253	5.74972128701	2.87502980624	3.08454335195	4.61535333648	2.01338647456	6.98520111823	4.97268078485	1.84202058338	5.03054051693	2.87175404359	2.15266428454
RDH16	0.050982474626	0.0704398366751	0.152370955357	0.0915306242644	0.0860028271139	0.0109464229288	0.0917012391033	0.0300776230929	0.128756174767	0.243252352014	0.146568577064	0.064162078743	0.10564319159	0.165080235962	0.0326771112326	0.14991003992	0.17681917686	0.100706523539	0.111473164413	0.148551118366	0.075583308278	0.0215139498928	0.101448629416	0.357826077973	0.281254550587	0.0983892974867	0.0161560680182	0.402402633714	0.552368118893	0.167607396405	0.551872807565	0.415153977824	0.0846387192545	0.0188952047747	0.107591422599	0.180430907337	0.146866202956	0.150681219263	0.0139808642467	0.201024343907	0.159013483037	0.0968405317631	0.0234524989328	0.018143239856	0.0437413168553	0.044291618769	0.10177707966	0.0246848089686	0.16277793157
OXA1L	24.1126131537	25.6374690415	25.3988727811	23.0552148014	31.4497683022	26.8135514123	28.6867970663	21.6085170951	13.3892678604	18.8242649401	38.2983586847	18.7593039495	30.3430879123	20.4364077494	20.0800812192	26.1588008214	16.0991088516	41.2905753938	22.5422971003	25.4622677894	22.7868683465	16.83301768	25.3477693469	19.8007955437	33.9075258108	24.6471920837	20.4469357411	15.597192637	29.923082279	28.175599399	23.4383854052	20.905454731	36.7477982989	41.968800258	21.979783133	21.9132006232	19.8354177765	26.2822458139	10.5808747521	9.69495195257	32.5024394277	22.3001043914	32.9690922289	28.3878966948	20.0027411123	18.7645968598	42.3114003531	37.5878511894	20.3178253469
PIKFYVE	0.847800146734	3.10539497315	3.9722410351	2.6285242803	1.39349140062	3.44108161669	1.39899566545	1.5373760163	2.59296347766	5.75649325201	1.89916921309	2.75975127243	1.57940082463	1.28773643973	4.74426283629	2.03905702453	2.43598321288	1.65857099089	1.4991073728	1.98116106375	3.03811234175	4.83837054541	5.35473359638	2.75474235831	1.80062947885	5.2412781153	1.43631501597	5.33206102369	2.55720459697	6.29954197937	1.78446120437	2.58498190823	2.4997066529	2.96387474806	2.39038146235	0.641918932428	1.95173203997	2.92433825105	2.98214725551	4.59254478744	1.59935953688	3.26803857024	0.847494328127	7.13076225408	3.4566336945	1.44002280471	1.70224044924	2.3587374138	3.61133480662
TJP1	6.3100599265	9.43771431666	18.7716818513	8.21152796763	3.27048430976	12.7354017353	5.74248716944	3.41746946494	5.90243306215	10.5025257671	6.12952001145	10.5937287706	5.84534141757	3.0983166412	6.19223280756	7.35716157783	9.44986977878	6.92120668886	9.47519449671	6.12953011187	5.27413507208	10.3268945682	17.7272909134	10.9303763646	6.64247059622	10.3137082725	8.57643926578	7.36517573879	8.59111043861	4.68857502782	12.2687899767	8.31794522166	7.01031434738	20.6599615485	12.5390186158	1.28534931439	3.80862155174	4.27726665109	5.18045317971	5.19850829248	4.75561031541	8.15305927417	2.21638640958	6.16486835876	14.3920387126	6.78716142289	1.2174363758	7.47219269297	5.44341541073
CHN2	0.775331526312	1.65132424407	0.0495134136356	0.553222770507	1.23152606163	2.47572351611	0.189308762628	0.384436791572	2.0050033082	2.2791482723	0.732058660425	0.701070023054	0.369037633059	0.386998336066	0.661003396205	0.250063821938	0.374625761608	0.383608509906	0.530007729558	0.282481445679	0.655590570188	0.32508264474	1.92417606398	0.880624944902	1.43363979433	0.856510555867	0.0909993814881	0.356279022159	1.58021583029	0.102521491428	0.458294875176	0.280391969601	0.465943575584	0.250207252869	0.70844388681	0.246741240481	0.183828194052	0.798730611286	0.0159009379106	2.82643557547	0.533387598125	0.0612810174534	1.0237492461	11.2740560672	0.195835629318	0.428582581483	0.0429946102369	0.344920418902	2.27890122197
C1orf68	0.0	0.0	0.0	0.0	0.0	0.0	0.0196896480663	0.0	0.0	0.0	0.0	0.0	0.0	0.0	0.0	0.0	0.0	0.0204219293724	0.0	0.0	0.0	0.0	0.0	0.0	1.81168864421	0.0	0.0	0.0	0.0	0.0	0.0	0.0	0.0	0.0172426210062	0.0	0.0823251663616	0.0	0.0343756416971	0.0	0.0178968446193	0.0	0.0	0.0	0.0	0.0	0.0	0.0	0.0	0.0
TENM2	0.0462646384013	0.847037899745	0.661792618993	0.0358019514964	0.00358824201292	9.1285058765	10.267728148	0.0501963921198	2.28381242037	0.201571713799	0.00849331779163	13.2636695398	0.0516525541534	0.00368975311247	0.00511262481074	0.0906917372493	1.10438414704	0.010504287791	0.00917945708001	17.22156808	0.527607311262	0.440952404614	1.26813246657	17.3981849956	0.0931865866316	3.16627827114	0.0370738220878	0.162417190165	1.0968439989	1.6443782734	25.7714402808	0.0152834197267	0.00311587782026	0.00739080728766	3.23028603627	0.512845379922	4.74889501301	0.150293286585	1.962125259	5.31462887113	0.126803023906	4.56939238249	0.0954031555504	0.840246708531	5.08260140463	0.303372026307	0.500011393126	2.39453796412	0.16978703853
MRPL52	11.1909213422	10.6319648907	11.4137710863	13.9929670998	16.9123796656	17.324688593	15.2193870934	9.52281449454	9.16541825142	8.06192092681	6.0281144595	20.7436819327	21.5975388953	21.3444465974	8.24378528307	13.877859347	10.9880466464	20.8763157119	17.2998053725	16.5494483812	8.98247243077	11.2435933076	9.11256534779	9.99055440923	16.1780093234	10.4344777633	9.37678811895	5.78451176756	16.1680677824	8.39196281091	11.1578086278	7.14382142798	10.2737561373	16.4396397127	19.4446729717	68.7406939912	13.7872575886	12.2143940917	15.9472882503	7.74407551246	30.5321341287	22.1559943547	38.0449118947	11.7265750467	10.3591273291	6.03793541928	19.4767056333	20.8700633044	8.08735614412
IGF2	16.7215153206	5.63646155001	11.1718777457	6.94638091516	597.60621853	13.0125504536	17.5877478066	2.63246505719	4.40794508187	2.1732727687	49.0407430801	2.02624010155	2.15313660887	15.3865876952	7.07966306917	954.159221854	19.3606332252	11.3272240098	34.1032206343	1.4118462014	9.2288096646	6.983651937	2.01414559276	53.2398926676	1.92702223566	8.5178786344	2570.24004292	1677.60733528	582.502409306	681.66943993	72.754494241	283.902321479	4.05768191619	3.95306419352	7.44825621893	101.791806577	6.22589928172	9.37212786372	0.392073194857	18.4296648922	3.60512389989	3.68340628315	2.11470142262	453.204379239	14.0179628463	262.654772729	214.539223924	5.13122582867	2355.0972057
PRDM1	0.296695749021	0.610241588903	0.845296356009	0.731796610464	2.5601844785	1.30681280909	1.74855451482	4.97306036485	4.5665940407	2.66562355956	0.696780109813	0.695754078391	2.37731184616	2.04580559879	0.239929726752	4.56045375392	1.78105356609	0.578156395845	0.430781586849	2.73504824674	2.91870955741	1.07650143875	0.667924007143	3.60612066943	5.26396674602	3.33185150806	1.23311377286	1.30047562015	0.219000982827	10.295610915	3.15348065572	1.82407578443	0.235584139576	2.25319012603	1.3458979151	0.241245009146	4.68914868523	4.29229730999	1.18622002592	0.909338984206	4.27124105025	1.11161544333	4.3368527466	2.88140514923	2.68829504464	2.43839497768	0.298916838011	4.10288888027	2.04362253525
NSUN6	1.58024100711	1.72893178147	3.0781546549	1.79469103275	1.15826975028	0.715441679726	1.88564123307	0.714846561878	3.0735339945	1.17321367109	1.55895357956	1.70362425115	1.61501500625	1.73984833514	2.13572666622	2.70184347764	1.29574386848	0.858766066619	2.59706207401	2.54441015573	2.19939881058	1.11850398156	2.32121400136	1.65709830762	2.49576482807	2.64607432323	1.71722960893	3.10130220313	1.66144613544	3.8565541377	3.07664152661	1.33009006584	0.907185422317	1.63726031081	4.45809435265	1.14651169841	1.13118978759	1.65070888016	3.2466460476	3.52985841346	1.32069849464	1.03974984228	1.23864236788	1.68439598148	1.80965283389	1.16962963534	2.54993191531	1.44224771806	2.12241078911
TMEM220	3.63476559006	4.65530558327	39.263990223	6.76061680941	1.86833051559	2.57797621225	2.41291922314	2.93043618135	3.25883014215	1.14762841559	5.58551374728	1.63937037623	1.80600770274	2.54411527357	1.43589262893	0.661199569462	3.32441020791	1.78998094518	5.09820975431	0.6954091967	2.00367034419	2.12972158594	3.99650248517	0.353337951567	1.99309851624	0.971552242001	4.09471276166	3.85261969251	1.06539195122	1.78648192166	1.06971823648	1.81662700212	2.56139279533	1.53463750661	3.33264157081	0.408301221802	1.2461329688	0.809052481595	1.64285516999	6.30367885345	1.6714927422	3.03486359033	2.40846734765	0.506117778171	4.98155576482	1.9729831487	2.81401439863	1.14563408739	0.756799830274
STXBP3	4.51768896511	9.2155483249	10.9305190399	8.56793718992	4.64937556697	4.6473368144	5.75620431605	7.4025069694	10.3693018881	6.98813504562	2.9665667853	13.8086153826	6.92554291735	2.71610894765	12.2026255655	6.17801949624	6.05124594607	10.8096338056	8.76367672482	4.33869130359	10.8233522156	7.81904892656	11.2668383179	5.6647744012	11.4943560085	7.75940665648	7.62966909201	8.02930742198	3.01829706472	6.43653879652	5.86523848191	10.1407239896	9.52866358361	4.49121869174	9.38355126849	1.84217048684	7.46024393623	6.6407092052	9.60378886759	8.16216641312	8.32511046469	10.003318698	2.22794098429	5.02145786727	10.8095919933	4.7975499339	9.04265268128	9.33264832861	4.60719073179
SPATA20	16.7735073576	19.6102891328	14.8582768448	6.20222623346	10.8924323586	11.6163760084	12.5305075243	13.5450107444	5.50900136303	9.78587538868	11.8455572786	9.26332948854	5.66115477674	8.85102083259	17.1105240515	8.95805696597	5.00835133482	14.042355113	10.1026349237	15.0090163992	16.9022409198	9.13226660451	22.0305568716	4.88746195619	19.6580570405	5.90200333839	13.0238069256	22.5296957483	22.385509269	17.2170180746	14.9822851639	7.52366928602	16.9200047287	23.8442897739	12.3236195622	7.52915604143	7.354074975	14.1199059344	10.7803072767	8.92325874922	8.31992082293	5.93149999936	1.11120110739	3.84189987979	14.0248906247	6.56085082906	8.00632629527	18.0052633946	6.39192367904
JCAD	16.5299938989	5.6068988963	4.03611908623	5.72644444239	6.64396289024	13.4099260505	6.82417542321	7.31274947941	5.75200129641	2.15490309191	27.0887279066	6.5199798375	6.39159073605	3.42991150784	16.7113597291	24.3044061443	10.0214664789	7.66865447385	3.77204199097	22.4636606728	2.13782922247	8.67231277026	12.4172830604	7.54027622981	2.04785236623	5.50862946824	1.74687251978	6.32911213845	4.47479673817	5.608327613	4.57139135499	6.31230131507	9.13342381938	22.623070803	4.11690840335	2.46600284366	4.18037677967	4.5839475637	6.20704528837	9.39614625141	5.03642410465	0.270910296186	5.56964848434	10.1901244465	10.6215226167	7.38151234604	14.213390057	6.76876089027	2.15559723717
FGFBP1	0.0779705483904	0.397567088275	0.0	0.0	0.0	0.0	0.0	0.0	0.0	0.0	0.0	0.0102215526474	0.0	0.0	0.0	0.0	0.018028009673	0.0	0.0	0.0	0.0	0.0	0.0136097770147	0.295082995175	0.0	0.039598062797	0.041180735552	0.0	0.0131584051209	0.125652950081	0.0347330082106	0.0207490135362	0.0	0.0	0.0	0.114976575242	0.0	0.0	0.0	0.0	0.0	0.012991580575	0.0	0.0	0.0	0.025088082318	0.0	0.0	0.0
GMPPA	7.32451470348	5.39440376371	18.4828604113	8.43655156553	12.4098148551	4.11831904441	4.71430599139	16.680775565	8.41260906354	5.63752877942	8.31039361688	4.6668434207	12.4676999335	17.8100769812	5.98241837836	7.2212677628	11.4802406179	8.79407506042	5.89380033569	11.2721129827	10.3892557993	7.85294281078	8.93385742445	7.67966062427	5.3966413226	7.57087328941	10.508456994	13.740695778	7.69162464425	5.1987865113	3.22295733813	7.26237658982	5.85231817236	7.98057457713	7.67919505187	16.3893381825	12.4590929213	8.13267326896	4.07441879894	13.9192566349	9.87581870873	16.8077202884	25.1901746894	10.8784769715	8.2172374574	9.45582811331	8.30632319925	7.58040987603	19.4177085159
CCBE1	0.166480220624	1.75427767098	0.0192603189061	0.0120519265034	0.157027188104	0.0634183517227	3.21604969574	0.0448839660609	2.18074917311	0.0166077718414	3.56242058172	0.646293683237	3.18542251739	0.0124207288901	0.0258157625004	0.0210547211306	0.0149004501418	0.0353603362769	0.0123602359587	9.91033440413	2.25683638049	0.0169965765004	15.4388507567	0.141345925281	2.40787508972	0.0790937739036	0.0822550285764	0.033787374877	0.187604805625	0.0129817819036	0.0322958357476	0.034298810273	0.427422920606	2.25905862552	0.0417543883417	1.28686531018	0.535734667705	1.84515189859	0.0	0.06972340728	1.87221419085	1.96769408774	0.12352053566	13.7268381754	0.030717129712	2.35868789128	0.487799576688	0.0442037108269	0.0750159511312
USP17L19	0.0	0.0	0.0	0.0	0.0	0.0	0.0	0.0	0.0	0.0	0.0	0.0	0.0	0.0	0.0	0.0	0.0	0.0	0.0	0.0	0.0	0.0	0.0	0.0	0.0	0.0	0.0	0.0	0.0	0.0	0.0	0.0	0.0	0.0	0.0	0.0	0.0	0.0	0.0	0.0	0.0	0.0	0.0	0.0	0.0	0.0	0.0	0.0	0.0
TAF1L	0.0	0.0	0.0101894399489	0.00255037067609	0.0	0.00305006507605	0.0	0.0	0.0	0.00753097872315	0.00605025919906	0.0	0.0	0.0	0.00455250616594	0.0	0.00394145192176	0.00311782673333	0.0	0.0	0.00324003291599	0.00299727808995	0.0119019864627	0.00293244552506	0.0	0.00577153231887	0.0150055286399	0.0324996438174	0.00575362694958	0.00274714220014	0.011390482181	0.00453634321038	0.0	0.0	0.00946699572957	0.012568626589	0.0	0.0104962947138	0.00779113799077	0.00546464142333	0.00857551851474	0.00284034073382	0.0	0.00252767788212	0.0216673704543	0.00274249548505	0.0	0.0	0.0
GSTM1	0.182790031637	0.0693822777078	5.49665119488	3.16809644488	0.197660425373	0.747197948551	1.55464350602	0.283422528008	13.7743209011	0.0310592912308	0.0374287531661	0.0331793552099	0.0273149892267	11.2601732151	0.0901222239728	8.03463706316	0.0	19.1566721534	0.064723942596	0.015174011383	7.91330574279	0.0370841572594	0.0736293270821	12.4011907185	10.7151590826	0.00714089269389	4.84194957393	0.0321684372562	0.0569499126093	0.0135957292325	0.0469766701415	0.740868638582	0.185371162758	0.0521122526588	7.16844534603	0.0103671155623	0.1425180764	0.129866576316	0.0192793446459	0.0811342621515	0.127321870432	0.0491994052588	1.45532465512	0.225172629677	7.27172305917	0.0203590986486	0.0561394592266	0.0476558318368	0.0748225524097
MT2A	73.4011681348	386.520155226	86.5141968387	255.065339617	213.210564285	301.829368224	36.2777294147	394.711989806	92.6683037483	848.127854893	172.408074353	84.8971238568	900.132813939	307.222180088	64.0253532752	311.093314843	155.091636407	407.182583767	95.1081216096	494.422137069	592.232042995	38.5243129413	55.7860673757	575.201912242	327.667066229	184.474754403	152.484560194	70.4807240964	35.8746745878	7.6113476485	53.2159820036	90.2593589433	539.112130831	284.29725104	108.421952878	70.8492029478	260.428227938	371.529659631	97.754202813	57.1628248169	914.809697377	868.493072159	2063.75736609	25.8480690481	136.265542346	52.0738202298	847.328113864	79.6233198091	37.1314548349
MUCL3	0.0	0.0229585617466	0.00397299954351	0.00298327138175	0.0112124122365	0.0249744884436	0.0	0.00326774828735	0.0	0.0176185787516	0.0106158480941	0.0	0.00430405550981	0.00384320351478	0.00532524996753	0.0	0.00922095037474	0.0	0.00382448588166	0.0179324033657	0.00378999710308	0.0105181109939	0.013922233318	0.020581198401	0.0	0.0303803729814	0.0105315430213	0.0114048430167	0.0302861221366	0.0	0.0266478122835	0.0	0.0	0.012317084934	0.00369130883547	0.0147020291451	0.0	0.00613896950895	0.0	0.00319610567251	0.0267496791307	0.00332246104656	0.0	0.0	0.0095044487258	0.0256640601206	0.0	0.0128728909699	0.0928452974388
CYP1A1	0.329042523863	0.0355172626263	0.00614629390807	0.00461516859464	0.0	0.165582572164	0.0	0.0	0.0102507788875	0.0136281117156	0.0273714782979	0.0161759418316	0.00665844278869	0.0	0.00823824696579	0.0	0.0142649578723	0.0169261231218	0.0	0.0110966860536	0.0	0.0488150583593	0.0323068767913	0.0689854608411	0.0	0.0104442052093	0.0	0.0176434747571	0.0416472141119	5.77161860219	0.0137415307593	0.0246269951054	0.0351454690381	0.0142910457073	0.0114210277448	0.0454885489823	0.0329124714242	0.00949708412534	0.0	0.00494442665028	0.0362094091813	0.0	0.00788349891347	0.0228705177806	0.0	0.0942939408346	0.0	0.0697009895628	0.0136793487375
BBS4	3.70743474145	5.65418238217	7.83132504813	4.0005302522	2.40781936114	4.85289833515	2.92734620624	2.88785778146	3.51916231182	4.40031329472	4.45971036424	4.42278379205	2.33182710633	2.37748961669	4.42652386949	4.55581994928	5.1433012152	4.11057162147	3.44844922981	5.03450949472	2.98532837613	6.93333055132	6.48619535579	5.95301284045	3.70646335475	6.32518210172	5.33253304922	4.98592944884	5.81421684322	2.55176338104	8.15713362242	7.74100236243	5.021362148	5.21383778662	5.05873902441	3.71583008462	3.86475627782	2.94852530464	6.05225514092	2.4888735046	6.29969288679	6.07242257606	2.58462478478	4.57084578894	4.78407079486	4.03071878726	2.86361306167	5.84893251199	7.15191069649
ZNF407	0.87359954995	1.09805906702	1.82201563512	1.57750740777	0.53440374156	1.16803630755	1.40562604641	0.997159153345	0.802054072288	1.23655828755	1.01811121328	1.38796945679	0.722364571532	0.447324297662	1.84554641266	1.80906041546	0.922520910735	1.1319813465	1.82393025962	1.06158827594	0.798001767398	2.33079556406	3.68851640747	1.18878791633	0.937140578767	1.60249364601	2.52353452954	2.47591937849	1.73688356934	2.94596588445	1.79863843023	1.12652845576	1.25916993636	1.51819792746	1.54157172398	0.60886180257	0.485357705133	0.992858207799	1.79376667419	2.03279819428	1.09467795293	0.706801665685	0.373208330844	2.05326405451	1.94596271548	1.01389090672	0.546620565588	1.30612164014	1.28746349574
CAPSL	0.0	0.414606484868	0.0372026776638	0.0	0.0	0.0167041449451	0.0	0.0917963756773	0.486031423638	0.0	0.0	0.0	0.100756612243	0.0	0.0	0.0	0.0	0.170752519598	0.179060070266	0.638083890122	0.0354890653846	0.0	0.374802467092	0.0	0.0673242299893	0.0	0.0	0.0	0.0787765310983	0.0	0.0831756090893	0.0	0.0	0.0144169580043	0.0345649606197	0.0	0.016601224573	0.0	0.0	0.014963969642	0.12524034793	0.0155555577105	0.023858871161	0.0138432120839	0.0296661618378	0.0	1.67735800995	0.105472642797	0.0413996149016
RHBDD1	3.12612815651	4.06655880838	5.13333568625	4.36269368433	2.47472907368	1.2619395438	1.47034138437	3.803410835	5.86348696484	3.92019736803	2.98108832494	4.69120121599	2.72109771973	3.78024955504	8.46581575145	2.52421437129	3.65413908396	5.60201888114	1.84570704683	3.05718427202	2.15765421563	3.85479909183	4.22468622228	2.33180480884	2.08243631907	4.97527418723	7.31273184403	3.8880985951	3.08021241167	3.51584066074	1.33578154765	2.65856697017	11.7283377696	4.07545504659	2.2714010037	2.25227756008	3.12588882241	5.10580026336	3.47524801242	5.35811010872	2.53468851721	7.0764985579	2.61570874323	3.66826132278	6.21549137705	3.04962013393	3.98063295818	5.60753892131	4.37592016735
ZNF516	2.96380600964	2.23984940211	0.228673998066	0.212223616099	1.39222218035	0.759106521199	0.798174769532	0.551565846188	0.232828783943	6.84784004128	2.29073990462	0.292461796067	0.528858791048	0.636270240994	0.616454876551	0.98165747548	1.52063200977	0.280670427888	9.90319644304	0.487075239428	0.776973851774	3.7026353452	25.2236422183	4.08839649389	1.71573551071	10.672812808	0.288325288675	5.74805383468	9.14243970082	11.5254721176	3.89186590631	0.494158324569	0.274951474906	0.252906463615	0.307948686207	0.104587125672	0.669584744795	1.88183733748	9.56570833847	2.32531565494	0.795764703105	0.148257697712	0.82060056872	4.26980626533	0.501972614887	2.22816794186	0.137298110334	0.497418878079	0.345966661343
IGSF22	0.299142118417	0.478833742059	0.0348895179908	0.042571855731	0.406162163728	0.203651855952	0.231590283184	0.154242309266	0.0751603793866	0.454490910127	0.143721463924	0.077475610678	0.226780426978	0.396558902476	0.14029355089	0.22884015844	0.197377099914	0.164138989868	0.142737618499	0.200782167558	0.428511587357	0.327131140592	0.0878745714004	0.214625209435	0.197306860767	0.459471675983	0.574173953223	0.14605706484	0.284431932879	0.172843536436	0.360768405671	0.413561571389	0.13894008793	0.0912637219668	0.137767179334	0.112969650927	0.260780855743	0.242596451754	0.0	0.0526258176318	0.201872772142	0.0948243148187	1.54949593032	0.0746492566517	0.156496510625	0.140858103161	0.116523298143	0.180165961232	0.0873573778599
TALDO1	62.0197850774	46.5445410934	24.4216698968	30.9781788379	80.0847793958	31.0287413623	29.1630224659	60.9184270861	53.5885477054	55.9933305426	31.7762915106	26.7975537462	65.3043671884	69.0296877808	22.0642597076	42.8448913775	30.3621439609	54.7617536052	60.1313211704	60.0804401824	69.2603064745	22.8780989818	30.7748535158	33.8842138469	66.2161246931	43.6240722938	16.9352725802	12.322748808	44.381360648	38.2496319304	37.7303107807	58.3570045032	39.3194592244	54.1593537413	21.0582277801	102.617511686	54.2573043997	40.6885424032	30.0006363217	21.7260904193	50.5618050829	34.2006665978	79.0946986106	25.4425339269	19.4743297258	31.6156047701	35.2673127006	35.8024591999	46.7540110186
FZD9	0.0906432636977	0.0969096518745	0.0451508117498	0.0474643836006	0.441731315722	0.0405457752625	0.0879128469479	0.401069280387	0.1907662059	0.0400449647075	0.0482571572044	0.130711711314	0.16630443398	0.620195734347	0.0	0.148071964153	0.23053953516	0.0414465589701	0.104311298418	0.179336305618	0.0947564117466	0.0956257345106	0.205683430726	4.10872493125	0.106219954394	0.207153082151	3.82991408829	0.155531229574	0.420669371583	0.167986923041	1.81702063055	0.0241213938372	0.0221296626199	0.0209964679233	0.0	11.6510415868	0.112828681978	0.0837189494539	0.528211163661	0.0	0.0759986071965	0.0302062583429	0.2432319051	1.4851848174	0.0144016653918	1.99785048341	0.437301895395	0.0365732156832	2.08011816147
ATP13A2	5.68169738542	6.98745709221	7.43138181852	4.7864121718	10.8813490273	5.09621107405	6.36010491428	9.22949967674	3.2107886549	13.8396937927	6.54012633051	5.33377662794	15.2957283818	16.8848560143	3.23225337835	13.8397816409	5.80669733607	3.47910290289	6.05869330841	9.1573959912	15.0638178671	3.90497234884	2.28159245232	71.5763629742	6.91324552508	23.2445151527	10.1282502153	3.43810966412	15.0533807838	6.96637608378	49.8259979035	7.82648998648	1.82543105973	11.3636257905	8.3234734767	3.18276960512	6.53188501624	11.0294177673	10.5608675236	6.21424916334	18.9760405814	3.82822778672	10.4803486684	6.20047035365	7.32328660502	1.67455427346	15.0270787175	6.00005987232	4.94216276596
SLC25A29	2.47211426204	4.18937474633	11.4870694341	7.43612923212	1.9111903518	6.80149693498	1.16361037054	1.32840480572	6.18913303381	2.49424074702	3.83604784563	2.92326254128	1.01297514738	1.39240021562	3.33078483334	5.39429881616	2.0945566364	5.73010943184	1.59018848202	2.01814555045	1.76505826434	6.51875280403	5.03412336076	2.83292420379	8.64530396926	4.64397428538	2.07304187543	7.8274774942	9.00233584351	6.21537401749	3.93087359243	3.19407267883	3.25206940651	1.12880272851	3.51980639616	5.23570085223	1.68926539347	3.38440210834	7.60471951258	3.95482795844	2.20824147896	1.81270995452	1.34472325112	1.60262444552	5.45217749726	3.34495081588	6.19373973106	6.13510563705	2.00857029766
SCAF8	3.18343463965	5.46936406414	7.12224935098	6.3487618225	3.67070087494	5.10559858799	6.0137164186	4.80296636176	6.93607049351	7.49889271419	6.91992021098	10.1959232371	3.30912215407	2.61572596264	8.7977443295	6.58782191268	6.19094877335	4.41283577742	7.13411125418	3.11905250729	5.10758292319	10.5579522652	12.033501133	4.90206020064	6.2492478955	7.19022361178	5.63628352994	9.24025888386	6.53497389825	14.6772755702	9.40856737599	8.62245870228	8.38247879409	6.23660348158	4.94237630441	3.81534063433	4.82662204088	4.94009518255	8.72105956429	9.46970015355	4.15926885735	5.52440831463	3.0335721079	8.93531225953	7.29816808956	4.91110540148	9.41692568824	6.31521812855	4.71514497397
MRPS18C	2.50423903724	2.81167901886	2.50347796842	2.7757592915	2.31425018085	3.69755139387	1.60512309376	2.65860804094	3.36484028925	3.27412163185	2.3341019681	5.20701772448	3.45473427244	2.9463201811	2.33784383223	2.93117977604	2.32614675243	6.92214432255	1.60381300914	2.33434047371	2.95933659949	2.66869362581	2.06014433497	2.24760559603	3.15246813776	2.4403832018	2.9672979574	2.59476194473	4.090211541	1.76166675501	3.07987776721	2.23103064475	2.90629565615	1.58722826594	3.99084648585	1.18811490606	5.95552726086	5.67843072812	2.48816860618	3.0785000184	5.5248051193	2.08630206552	3.66184150209	1.61124348786	3.44599355849	1.49593491087	2.95607825747	2.5199080895	1.34708272224
ISL1	0.00612780333464	0.0	0.00732564870722	0.00550073009112	0.0	0.736790737483	0.0194505302029	0.409718035784	0.00814513658997	0.0703866908004	0.0	2.08703747076	0.0	1.01334421835	0.0196380141065	1.38140558646	0.0170021270962	6.47582781692	11.7342127379	0.0	0.202658325318	0.0129292717607	0.0	1.26496054017	9.97584720351	0.0	0.0258915658641	1.10051326846	2.02897402044	0.195529418886	0.352132685774	0.587048772985	0.0	0.0	0.0	0.00903615346717	0.215752555996	0.0113193906907	0.00840210162224	0.0766111631049	0.0246613107044	0.00612614781452	0.0	0.959514242154	0.0	0.207028909691	0.0	0.0	0.0
TRABD2B	1.39846507964	11.365657488	7.64480912077	4.09512229041	1.98778609002	1.380027397	1.20868518436	1.26891023615	0.567334122959	6.62190800745	1.18161200897	0.169837040676	5.51146117567	0.638756378313	0.893124820685	2.70201231806	0.208985486031	1.1103647459	7.01810340654	0.0460613436238	0.103076713933	0.243682032394	0.557447488791	3.35071214519	0.0217267560529	4.72037168744	0.278470526945	0.384850487914	0.808439390654	5.70745388664	32.3516639864	1.9522863059	1.51770138357	0.00697892266201	2.70223643474	6.15327365851	0.0857202838344	1.43308893189	0.00344254433826	0.13521608053	0.697199164638	0.0251003099253	0.766119410689	2.8658735645	1.09380791971	0.113907526436	0.015036500026	1.7432289968	1.4696451295
ZNF331	1.40313692226	6.31930337796	3.63349521658	2.84321976112	3.30758326215	2.2791279752	1.42655678685	1.26056688378	1.72837311053	3.16808628852	3.11456821378	2.8130895348	1.17199966197	1.03329559261	2.39481617833	3.3642647696	2.69792384045	2.24700417095	1.20183182125	1.8866197072	2.03537459072	1.6755436105	4.06627486415	1.71477939519	3.54478013355	1.05380652057	2.068740468	3.77214887621	1.95529507151	2.33781801232	1.61555005601	1.53614387365	0.243252565622	2.47523759504	0.941691669419	1.27043313253	1.50924422129	2.21198002078	1.87690207923	2.93617559607	1.82559118062	0.548309254703	2.04290040652	2.43975865144	1.82341520543	4.294926788	0.953470018427	1.32555379871	4.85512001634
MED12	2.70197090681	3.26981247504	9.46011483143	5.1114250868	3.45058400115	7.53261324075	6.04478294786	4.78964846991	6.68029109189	7.58668260887	4.6801578359	9.1278960732	2.67992233695	3.04760189806	9.83297186328	10.3927613486	5.34216908698	3.28096654476	8.860145493	4.55351951771	6.75946008856	7.23161943566	13.6207968099	7.72085063327	6.95178211463	8.07870877615	13.5747178353	9.3812434481	13.3906310343	14.125554343	9.19885829696	6.10290106383	7.62557276801	9.74301905286	5.10666452366	2.41657533568	1.92103557535	7.47351450961	9.61419502605	10.5884746885	4.35297708626	3.12212089642	1.65943670563	12.3157045202	9.20116486044	4.69519659357	9.43472568935	7.12856058551	6.39171024141
NANOS1	0.835315546423	0.403505356957	0.173441161551	1.0379303919	0.128549641045	0.962827413641	0.0418643973449	0.0951022944429	0.373999042506	0.543835277075	1.02985442618	0.750402424791	0.0227749574102	0.0305045309597	0.211339643969	0.456763489322	1.70164754186	0.279826695672	0.166957802634	1.32845315489	0.807206169163	3.41361098503	0.833387936347	0.68519798082	0.49458253099	1.48701224169	0.496906007703	0.538110607386	0.387293431083	1.6621379744	0.417146281956	0.259726822913	0.420748221569	0.0285144962271	0.200209166348	5.45219950209	0.853700512831	2.88299273327	0.253179982266	3.23446371445	0.20347269621	0.206574863348	2.44035210205	0.934821739096	0.922036421572	0.263115713213	0.509042485155	0.336327910536	0.32752794662
LCE1D	0.0	0.0	0.0	0.0	0.0	0.0	0.0	0.0	0.0	0.0	0.0	0.0	0.0	0.0	0.0	0.0	0.0	0.0	0.0	0.0	0.0	0.0	0.0	0.0	0.0	0.0	0.0	0.0	0.0	0.0	0.0	0.0	0.0	0.0	0.0	0.0	0.0	0.0	0.0	0.0	0.0	0.0	0.0	0.0	0.0	0.0	0.0	0.0	0.0
TRAPPC4	9.57231073546	9.81982224745	8.04658090387	9.84496271583	6.12829151612	8.5427077143	5.35480664786	4.44931139366	5.0944675903	5.41896409089	5.73272182112	6.23747778803	10.7239143696	7.69629019377	7.38290376209	6.53320008996	3.57491222943	12.3898891949	7.10920733838	9.55152649285	8.11087399493	5.58932418214	5.88335567792	5.88334377737	13.9148966871	9.70532340958	10.8227299411	3.95781926986	6.06744812129	5.19595972232	4.34829219609	5.00869480122	10.388094172	7.19473520949	4.6100511874	4.83857890063	8.11982365897	8.34602459557	1.83260298142	10.6728912269	8.78744393572	4.2043585591	7.49700040983	3.2035455077	6.36737413672	3.5122851555	7.2843241982	4.45174873625	4.04522161267
ZNF195	1.05485588733	2.20722416532	0.920829808019	1.51338969116	1.72900280472	1.06269844878	1.32228626905	1.36874522325	1.26232353849	1.62355712404	2.31552925735	1.56940849201	2.46785752376	1.38083629748	1.43747236205	2.9470911642	1.73375833226	1.41220020413	1.56278447908	1.78934791509	2.10960705452	1.96786505625	1.79805679882	1.76565580754	3.66739574083	2.17743567276	0.856117845459	1.88960409367	5.29357866969	8.07898287078	4.79132083599	4.47985703659	1.45910025295	3.06112246517	1.55303171283	1.84288780769	2.10900107548	1.86283583367	1.07310541066	1.23758765216	1.67756309011	2.25758580155	0.929697754157	1.69532670531	1.90502071476	1.54080112078	2.23550886368	1.33901403698	2.20168866339
SLC35F2	0.612908923365	5.12502264705	0.318079390949	1.4501090669	1.69381530661	3.62657907144	1.04059551657	9.61441701185	0.312611525636	6.17534582245	2.39795357815	2.6646078031	0.713780767711	0.956030219287	14.0540237806	3.87452184318	3.47364388802	1.91353533161	1.91368342515	4.39931208471	1.00239662418	5.94971554498	2.17947562276	1.84879921487	1.53668868108	1.33677818613	0.6624813729	1.15764832961	13.6967527512	0.211328181904	2.32391577696	5.81861622451	19.3900020525	18.1021450204	0.263863534459	0.350312002857	4.83606132779	3.70370950647	2.29314759755	2.51311758113	1.95515362235	8.71615521459	1.10738026707	0.401572327939	5.23591394955	1.99504925794	0.512187608634	2.82956844952	1.28311518313
SPOP	36.8652452076	8.50679794527	29.4317788547	24.7064912682	10.2417594501	12.2640496903	19.9448419532	11.7280541137	26.564941688	11.5979716442	8.32041886872	36.4260088559	8.35284949552	10.2177938652	29.2653135117	12.7298906526	11.6548115544	36.3853546476	22.1613359174	7.57562756134	10.581415285	22.2667695344	25.5315854362	7.66265113971	9.15039698949	10.3635081724	17.6373346666	10.5251899774	13.5350304371	14.0276727956	13.546575484	14.9608030258	49.2224767137	10.9336243556	29.70320658	9.58826244401	10.2865272709	16.8225661854	18.787388955	19.4012791854	13.2065995967	7.24486690404	12.6995012152	13.6532259319	23.6067087864	13.1863137617	19.9763202391	39.1327239663	7.56383293291
VWC2L	0.0	0.00999741577066	0.544969434516	1.19125619889	0.00759499791262	0.195754692866	0.0	0.0	0.0403955168013	0.00596718467089	0.00359545039975	0.122177847457	0.0	0.0	0.102804816104	0.00661935472638	0.00468452488445	0.0592899762123	0.0116577349762	0.0	0.00385086894948	0.110432791362	0.0212187613342	0.00348529280761	0.0182631455636	0.00685962617478	0.010700692087	0.0502147460344	0.0102575177204	0.0228553826792	0.00451263462315	0.0	0.049463815684	0.0	0.161275612146	0.0	0.00360275141307	0.143464078647	0.064819884561	0.012989755674	0.0	0.0	0.0	0.0751053810481	0.122323284901	0.00977859575627	0.0	0.0621283130814	0.0
HNRNPU	27.0272945857	36.9397524272	43.5234292542	38.2114346424	29.8709353048	42.1288355696	45.0802518654	40.9079675685	52.9291444015	33.522898989	33.2086524274	53.3566457152	44.0997969515	31.8420259828	40.6072394002	37.2580846342	28.8643557324	47.2112108527	72.7525938589	52.9342026217	40.4200824528	49.0360910419	69.5723719787	36.2371165493	53.4589424379	45.3667979702	41.2086324923	45.30167929	70.998183936	64.6394274249	35.2931782223	35.1909111957	53.1228443397	65.7383051507	44.5788426338	26.0728754826	34.0685859622	46.3317677032	88.9941635515	68.8808729073	38.6204740239	68.7210562266	25.707961785	56.4748825079	43.0488582328	29.989521571	35.6626311576	45.0227556918	42.485123242
TEX33	0.0	0.0	0.0	0.0	0.0	0.0164291200284	0.0	0.0150474994792	0.0	0.0135218266156	0.0	0.0	0.0	0.0	0.0	0.0	0.0	0.0	0.0	0.0	0.0	0.0	0.0	0.0	0.0	0.0	0.0	0.0	0.0	0.0	0.0	0.0	0.0	0.0	0.0	0.0	0.0	0.0	0.0	0.0	0.0153972914753	0.0	0.0	0.0	0.0	0.0	0.0	0.0	0.020358996063
LPXN	2.56994656933	3.02372859853	2.67864557224	5.07016585032	13.3318535714	3.44293620661	5.24889942373	9.63616980631	2.83556405691	13.675011865	7.03537971633	1.90882834464	24.9762858281	6.70549437243	2.89063288955	10.0054753065	6.85247059202	6.77960870325	2.331373728	31.8209167514	24.6464510194	9.76489145725	2.40661350431	4.83964057818	8.70371029252	18.9922389265	3.23643523785	3.13631179676	0.623378775882	3.10099460494	4.89815666336	9.41835319906	2.30697471933	41.3293044765	2.40126298168	1.96345688625	21.3475799528	18.354279591	1.71771380348	2.8501903912	37.373576598	32.1120748895	24.2038915213	4.03150585236	6.07362654651	3.07501889385	11.7042238926	8.65826628746	3.43795525166
CSNK1A1L	0.0513808414269	0.00724390197847	0.0350997831658	0.0131779751643	0.0082547462766	0.0	0.0	0.0144345921853	0.019513120243	0.00648553113648	0.0234466403874	0.00577352038565	0.0	0.0	0.0117615870023	0.0431661162331	0.0101829032193	0.0161100673104	0.00844693182674	0.0	0.00837075835651	0.0	0.0	0.0	0.0238195140392	0.0	0.0	0.0167928334139	0.0148647319695	0.0212920647332	0.0	0.0234396586831	0.0	0.0	0.0163055820047	0.0108238546519	0.0	0.0406764139283	0.0	0.0	0.0	0.0	0.0	0.0	0.0139946357797	0.00708534993146	0.0146531921838	0.0	0.0
KRT84	0.0	0.0	0.0	0.0	0.0474687369539	0.0	0.0	0.0249017414899	0.0	0.0	0.107863511992	0.0	0.0	0.00976232479805	0.0	0.0661935472638	0.0	0.0	0.0	0.0	0.0192543447474	0.0089058702711	0.00884115055593	0.00871323201902	0.0	0.0171490654369	0.0356689736235	0.0	0.0	0.0	0.0112815865579	0.0	0.0	0.00782181994975	0.0468824453912	0.0373454029049	0.0	0.0	0.0	0.0	0.0254806037704	0.0	0.491889633449	0.0	0.0	0.00814882979689	0.0	0.0	0.0112305360691
MANBA	3.70287096993	4.11293076531	2.59496062563	2.85795559683	6.56302520822	5.64034648891	6.41378908845	3.89612346299	2.95480493526	7.02068238982	8.5830266362	2.4565018788	3.74915628827	5.8167534309	4.18253855332	3.62318073585	6.48437187037	4.45632301652	1.28872527162	3.86728123795	6.40700245607	1.85935402053	1.61785195907	4.18703588026	2.75555950762	5.64054856608	4.20768326529	4.70983744223	3.60527979417	4.39808707427	3.22252496137	5.48116290257	4.1618628997	5.75632548179	1.9111100693	6.08381710919	5.56762806645	10.2967494149	2.82989793517	1.92648915555	7.04463040686	2.95061476615	7.90215880126	3.74504254278	3.66363209716	8.63783685226	2.83732832615	3.99315185935	5.46074267352
MID1IP1	13.410666878	9.74450840935	7.9547962934	18.1327721297	8.87190944163	29.7394382132	26.4751995251	22.1023389606	12.7591093203	22.4387398769	7.57129755445	10.0572958025	10.8806773128	3.72352068152	16.7176963259	8.7415827268	11.3450169738	16.7827200047	32.6245558208	15.5083360919	23.7907598153	9.71864020061	11.4536615573	45.0796324038	10.3883374102	19.3672766895	27.3227443697	4.82923783873	8.10600112319	5.66354315211	36.1302007433	10.1110709416	10.3887847143	45.3853445868	25.1328303896	0.412277482201	28.0895785964	28.3445487375	16.3498202491	13.5066211369	26.0760565711	11.4784419302	19.8775872855	12.4411211587	31.3078981924	11.3439107072	1.72091883191	17.5257923161	11.7719368037
TADA1	2.09206059833	4.53514225836	5.58630285055	5.75698279984	2.11143761579	5.0357387619	6.28104424937	2.50831608598	5.57742007804	2.89122482787	3.24932610949	6.06651046977	2.97958011406	1.75761383286	4.66068465198	6.23917187544	2.46406325124	5.17377829253	8.2376999285	2.74010996779	2.09353146763	4.13115759666	13.4956716888	3.063646483	5.17070763014	3.79584116581	4.89194616279	2.29085305723	5.12991281654	5.85536810351	8.05288253424	3.50213657024	5.663426046	3.12575025027	14.4651093845	1.69630222694	3.516652585	3.08278620039	14.4488244872	9.36046046334	3.16030576749	5.44027150027	1.00532570518	3.72252989947	4.5228131242	16.0520121157	4.33109391276	3.72276577674	2.12503119486
WFDC10B	0.364419491644	0.0829944198104	1.20642968995	2.34022013238	0.157626345568	0.240751803336	0.14829742869	0.0275631974587	0.223564606212	0.0	0.328327399202	0.3748389378	0.50826113287	0.032417116631	0.449180608373	0.549511511412	0.0	1.78422831193	0.0322592348812	0.0907550395098	1.4385746147	0.147865719104	0.0587164665492	0.14466731257	0.212258336216	0.0	2.57614915689	0.160331576166	0.028384559618	0.0	0.0749240605686	1.74558486735	3.17552462425	1.24672360647	20.7987792402	0.0	0.059817110763	0.0	0.0384362807545	0.107835590754	0.253835348036	1.7375311049	2.23515964432	0.0249397551036	1.46976996248	0.0811778663576	1.79075963907	0.868654509382	0.0372925102487
ATCAY	0.0032686154378	0.0225803807369	0.472814152967	0.108562808169	0.0073518117866	0.43862679328	0.539502916589	0.0	0.00651701378465	0.0	0.0	0.478205209865	0.00423315768631	0.0	0.0785629603761	0.00640740796205	0.0317417094243	0.0860873335898	0.00752297537484	0.0	0.0	0.717243154967	7.79810751467	0.0877161051228	0.00353567467323	0.00995997914883	0.0138107519564	0.100952808091	0.304491777801	0.36977967836	0.0262088607208	0.0208757426583	0.730968327845	0.0	0.00363050437751	0.101218967266	0.0209243641203	0.00603784637619	0.00896348579504	0.078586459114	0.0164431559898	0.0	0.0	0.0058160450547	0.0560873298489	0.00315516415604	0.0	0.487442511684	0.0130451312919
HMGN2	60.9066674603	38.7477096363	120.767987616	118.28222765	72.5806182846	102.707655535	29.6778086566	140.261191156	197.889427473	46.1160037406	44.5110310893	113.12186204	108.980383801	71.7117267585	34.5355258823	79.6835494777	80.6383172471	141.440695637	217.505673284	87.7498865873	81.2505107611	148.142709491	71.2036031789	77.9470247775	108.398953346	80.4954439343	270.112749568	88.8588396156	290.057730708	97.9654602534	148.699026737	86.3020112594	48.7284233951	116.70797571	167.018089472	20.1051137283	65.171087871	66.03810127	191.238497004	242.089504408	182.245483956	143.608859184	65.6110874011	82.6244444668	66.3490981201	35.6982013021	170.980431342	44.925022157	131.096030448
CHMP4C	0.274463851609	7.55622828596	0.0	0.0424788427722	0.170297273668	0.0711224177862	0.0300409582234	0.0558354160738	0.106930016637	0.167247458889	0.110850086547	0.0744431406638	0.159342316575	0.0766127997549	0.0909915701848	0.148421115623	0.131297240866	0.114246795669	0.021782763103	0.0306407689663	0.0647589858706	0.109829521264	0.0495597185504	0.17583358248	0.225225887304	0.0961303453754	0.119967030258	0.0	0.479160572329	0.027453755492	0.0126479523468	0.272005556872	0.0739394801078	0.0350766287993	0.0315363587647	0.0418684795697	0.0504887188916	0.524477234253	0.0	0.0273056359224	0.0952222634649	0.00946171382714	0.435366861218	0.269445585685	0.0902226518916	0.0730861819297	0.0	0.256616183439	0.0755443133654
BCL7A	0.903864526231	5.25917876395	3.83016158612	3.1585468686	0.417487722274	3.39619565986	1.63373392728	0.179864033378	6.29139407254	1.95379169316	1.90763151918	1.06219759391	0.857037431968	0.553732743184	2.61215799946	1.16539966084	1.76519890539	2.34690429926	3.64674311877	2.45308176101	1.37437014218	2.78685775418	6.81227282202	2.46558054361	6.77416094502	1.74597600056	3.4439765917	6.84675664556	6.81242401688	4.33083515617	1.59257852735	2.28504003024	1.79425439316	5.10463526913	3.27175911517	2.1619186427	1.44654447902	1.70938834514	7.55400257131	1.83423165735	1.17464095557	0.11295254167	0.367114070119	2.65896158258	1.69509466309	2.1111191353	4.96209539746	4.08980471834	4.0081637824
CACNA2D3	0.381947162795	1.02259077428	0.0904176427161	4.1924161866	1.96057471277	1.60361579926	0.300087944565	0.546601224121	0.59314035781	0.380915936239	0.14898406999	0.493773222258	0.205698831076	0.306123092811	5.47788736789	0.644940598298	0.587581862166	2.93403652225	0.409077492433	0.0489727408062	1.00915855198	0.466774396367	3.19218922745	0.487903677296	0.0449969492193	0.821994733119	0.822891623178	0.341743149712	0.578206243352	0.606992540057	0.32849467669	1.53971453874	2.94702659971	0.259289144064	0.226818676272	0.468424908043	0.0605215949369	0.279421704244	0.0622223303006	0.552801722194	0.445163062188	0.499043609463	1.01476836924	0.11102730377	0.421789931612	0.478201949357	0.0603949985341	0.6921218712	1.32815638213
FAM47C	0.0108014245935	0.0	0.0	0.0	0.0	0.0	0.0114284256972	0.0	0.0	0.0	0.0	0.0	0.0	0.0	0.0	0.0	0.0	0.0	0.0	0.0	0.0	0.0113951563346	0.0	0.0	0.00584197255641	0.0	0.0	0.0556012254961	0.0164057546416	0.0	0.0	0.0	0.0	0.0	0.0	0.0	0.0172865962297	0.0	0.0	0.0155817482052	0.0	0.0	0.0414064507152	0.0	0.0	0.00521325747251	0.0	0.0	0.0
DNAH17	0.0624930944248	0.0649198963007	0.18873869001	0.128927032534	0.17261787533	0.0670893132124	0.141521484593	0.0711495995984	0.101282760978	0.205369247445	0.173940069097	0.446708756195	0.0553761043076	0.0874827452166	0.0808123543	0.240709785481	0.152098740661	0.0649703372621	0.155187988015	0.104119265591	0.0937734880452	0.109880348751	0.160752183686	0.2127439347	0.0960617873738	0.190426169509	0.312690325637	0.432680259246	0.635004960512	0.201420711699	0.257871239007	0.236324669011	0.0963604753019	0.161519513673	0.0645410729475	0.0404181063639	0.171953769176	0.1458169137	0.178890487221	0.0875143258088	0.143400898133	0.101934870507	0.1294478548	0.0507217765827	0.0867488445472	0.105831586386	0.181662104093	0.102983527339	0.0933470333515
UGT2A1	0.0107390265798	2.31571842688	0.0128382606106	0.00964007547741	0.0	0.00576442824954	0.0	0.0	0.0	0.0	0.0	0.0	0.0	0.0	0.0	0.010525760176	0.0	0.0	0.216271246315	0.00579463614991	0.0122469106754	0.0	0.0	0.0110842696162	0.0	0.0	0.017015694623	0.0	0.0	0.0	0.0	0.0	0.0	0.0	0.0178920174688	0.00791796725217	0.0	0.0	0.0	0.0	0.194486189435	0.0	0.0	0.014331449421	0.0	0.00518314136063	0.0	0.0	0.0
SLC12A2	1.33810446381	3.61520704148	2.50641877166	1.45984135863	1.00384805259	3.25705763947	1.95020018798	1.69186441865	0.937738638023	2.51973101918	1.43888144805	5.20134307587	1.12600049363	0.628157631342	2.92696092416	3.39245033325	2.33191730334	2.6842523452	1.68662194374	2.51814597155	3.34849016186	2.06332578742	41.4539960712	6.36376097073	2.22130816971	8.09258673038	2.88814662993	2.41724207517	3.50803771512	13.5373685704	5.70772533243	3.17305807154	2.56819742793	3.93583359095	2.20362968414	1.94388472025	2.05138922193	2.70732354782	2.72031119061	3.31432142127	1.48292781158	2.93376301374	1.18842415447	3.04840796933	2.67278514677	2.02541212507	2.93245497091	2.47287342251	2.32431235341
KCNK12	0.0	0.0260715454902	0.0189491574338	0.0237144414699	0.0	0.0255247330762	0.0251562130343	0.0415612610895	0.0070229719229	1.37718337614	0.00843868612895	0.0249353897643	0.00684270784716	0.003055016227	0.055030503853	0.00517864251593	0.00366493121102	0.014495445755	0.00304013731864	0.0	0.00903816511852	0.00557399569399	0.0525681454446	0.0	0.0200034034131	3.0026230693	0.00837167084745	0.0302195640941	0.0401247701406	0.112394073344	0.0141218124632	0.016872346684	0.0154791776232	0.00734326731557	0.0117370920878	1.99455549405	0.0	0.0243997636279	0.126779355368	0.0279469201168	0.140871973256	0.00528214151128	0.0	0.265588805658	0.0402945025411	0.306010805118	0.0	0.0306985232373	0.0
XPOT	5.24006237436	6.76420299862	12.9186601306	9.85544685949	4.65776861056	17.4891195349	18.6677141556	14.4643904839	15.401412475	29.0109908658	12.1956662006	9.49966451399	16.2717413606	6.83070555475	13.7533807759	10.4694479308	18.205371602	19.3198800873	16.1642685199	14.9823457335	13.8168801396	8.9082067922	22.0320703476	28.4337277099	30.3566315231	15.2657468734	29.5630595197	12.3750982144	17.9454093174	13.614147347	9.85194420005	26.5666886729	10.7169272097	20.6451562993	19.6449160434	3.58592952369	13.6149316413	24.595332836	40.2188911518	15.8678226698	25.704448314	34.6398020104	5.56011488007	61.4805265189	19.6338506637	7.81066885239	20.8306667973	8.94329154012	19.4392527044
KLHL25	1.48249889202	1.2264641509	2.36890716929	3.87598403884	0.591508200779	3.80812391515	2.13023227044	0.916469633745	2.33962419834	1.23208022042	0.567851062303	2.79784525968	1.17859694753	0.814761274626	1.8894332115	1.48183136067	1.70030927247	1.94636347921	4.2341418804	0.960980083132	1.4116723328	1.51237196783	4.97812990291	2.74469101873	1.61950258468	0.969080170986	1.57632257308	1.09138296894	4.73871552929	3.29981286922	1.80465378192	1.14057203817	5.47326016584	1.63201801927	7.33106104436	8.33321357742	1.13017797791	0.958022801185	4.45454078548	0.995190004847	1.6958690727	1.48454407908	0.964055052406	1.91530686098	2.7775503934	0.897353336381	0.839999976149	1.69855558436	3.18941623875
CA6	0.0	0.0	0.00793107422021	0.0	0.0223827042166	0.0142443309637	0.0	0.00652322103642	0.0	0.0	0.0	0.00521829077681	0.0171838850332	0.0	0.0	0.0260099363028	0.0	0.0145607896126	0.00763460479907	0.0143189769324	0.0	0.0279956132339	0.00694804168408	0.0342375683392	0.0	0.0	0.0	0.0	0.00671760802378	0.0128296287874	0.00886592001469	0.0211855066835	0.0129574633622	0.0	0.0	0.0195658860198	0.0	0.0122548775246	0.00909649018606	0.0127604098751	0.0934480244461	0.0729568512456	0.0	0.0885351937374	0.0252975910488	0.0	0.0	0.00642435599303	0.00882580069747
PEX14	58.9542475612	7.78041510857	7.33122549488	9.9353176755	7.83163471737	5.317439663	5.93318453763	10.5290493985	5.106342504	8.76335361335	6.30992541523	8.21406359759	9.40070966789	9.26696585842	4.23294607369	9.68644765726	7.23140487104	9.48637144857	10.2668380956	12.9369111913	5.26532718742	6.64995832021	4.81690678836	6.90780379653	11.1749230232	7.36682624703	10.6759441314	6.92054251767	12.9624085897	8.18176912839	10.0629642684	8.8500951025	5.72959993872	12.5715633114	7.45327881222	9.27780344239	9.28593238002	8.44154426617	10.2761546205	8.77842917585	12.476494686	12.0729825666	5.31650532068	10.2298795141	7.38065876622	7.17184088088	12.2894243511	5.59586074804	6.64429261896
STPG1	0.377650090036	1.58294961436	0.0818603155856	0.150875506278	0.861083222984	0.253947751669	1.03405700893	1.72403573812	1.80932088778	0.537190348832	0.324781837837	1.5733769012	2.22241076956	0.153572804907	0.0166245907223	0.309136542902	0.189989930633	0.116132177147	2.03686878543	2.19449972167	0.144347634937	0.612936502174	1.3060636664	0.539710552076	0.915770897176	1.08542240162	0.911811450277	0.750060161746	0.426518779173	0.156497051046	0.956688083925	0.768642342828	0.0385009153998	6.6791118836	0.202816840953	1.16885421451	0.929832423211	0.659272381968	1.83510547345	1.58446478695	1.1837298747	5.50556349851	0.270448195895	0.0479982597341	0.648814400716	0.12819063845	0.0248541278775	0.144673688996	1.39127221879
HIST1H2AJ	0.0	0.0	0.0545543141452	0.0	0.153960616601	0.0979803850787	0.0	0.31409225011	0.060657063701	0.0	0.0	0.323048605764	0.118200263458	0.422176402636	0.0	0.0894553623229	0.0	0.0	0.105030067055	0.0	0.0520414589296	0.0	0.238962363863	0.0471009854878	0.0493624037713	0.0	0.530241874046	0.469808804579	0.0924148452677	0.0882492812199	0.0609847004628	0.145725629952	0.0	0.0845645857099	0.101372688122	0.0	0.0486883459699	0.0	0.125141379201	0.0438865776323	0.137740111338	0.0	0.0	0.0405996013314	0.0	0.0440500050003	0.0	0.0	0.0607087376141
GCNT1	0.371623823707	0.431473387843	0.218867215143	0.198685043158	6.94502215129	1.44621504329	1.19115211483	4.88192290932	0.397715311763	1.00921407213	7.37562450446	1.49807980247	7.85630313689	2.211967884	0.135734137112	1.21057479491	6.19419873867	0.344847170363	7.73877232505	10.9963428578	4.20999539879	1.9573733146	0.515120478623	1.06328124427	0.508395334153	1.40439250475	1.1026089377	51.7844446875	0.553373744679	1.71211525199	0.737647837533	4.82981366255	0.370918666128	3.32429889381	0.625223073069	0.382795676586	3.48684795124	5.96623488367	0.52078989721	0.275929302505	10.4334458001	3.34644260433	5.79054766162	1.93270560787	0.588710132525	5.73960046585	9.33893758858	1.23572084948	5.27103637818
TNR	0.00681339861514	0.0215170718027	0.0553877828336	0.00122323334279	0.0183897403162	0.019017720576	1.00636282858	0.00401963296272	0.532518471742	0.0	0.0203131850516	0.0450174214514	0.0	0.0535782899873	0.00873406738502	0.0160274190829	0.0718366107666	0.00747701040679	0.0423402457815	0.00588227107934	0.00466204736245	0.0115006670414	0.112743770839	0.0	0.0	0.0207614843137	0.00431825768636	0.0685862853599	0.00137980498143	2.39673403791	0.00364214183319	0.0739759968715	0.00532295794295	0.0	0.0121084044146	0.0120565714317	0.00581555243529	0.0151030018382	0.639003167543	0.439018160274	0.00137102425637	0.0	0.0	0.0193975873028	0.0493634861137	0.0394614628127	0.0	0.02903055435	0.00543849107793
REXO1	3.50217338257	4.61617549078	9.49433944307	11.2212777786	4.51922827805	5.47005323506	8.01473581714	5.41084811047	7.71413995383	9.27127071889	5.60256096556	6.2602084982	7.98025702561	3.08757603642	6.88000580995	8.25028275559	9.11389228539	5.42383111517	9.27625188594	7.96581019033	5.45822713013	3.63017592903	5.59957901131	9.12280587817	6.15830879686	8.20127748733	6.64528278049	13.0870533399	25.0399969671	10.8520645252	10.1231787548	10.8908255562	9.88540556467	10.166049027	5.3010077492	1.55281404705	5.60306496836	9.09840387714	11.9281108786	6.520537539	14.4123209053	5.69840860289	2.48453040051	9.93373615428	3.8761587942	4.93812502679	5.6555403056	11.3616175316	9.43115318331
RFX4	0.0	0.00513897336287	0.0155628184979	0.0116859089802	0.0	0.0	0.0	0.0	0.0	0.025305332015	0.00277225498904	0.0	0.0	0.0	0.0	0.0153114662623	0.0288958456679	0.0	0.0	0.0028097535452	0.00296919425118	0.00824019487269	0.0	0.00268731849975	0.0	0.00528908224887	0.00275023930489	0.160827958755	0.0158180208397	1.49791543123	0.0	0.0291000096963	0.0	0.0	0.0231350318758	0.0	0.00277788440076	0.0144283431979	0.017849665985	0.00500784477185	0.00785867950577	0.00260291287062	0.0	0.0	0.0173741453488	0.00753973990938	0.0	0.0	0.0103911019269
CLIC2	4.17878212303	3.17278315451	5.03280836329	6.03980938755	9.04930629814	6.22849922901	8.64532235339	8.32777366598	7.14560500613	6.13728095083	22.0287295775	9.54767879346	27.7038110452	11.182193066	1.12595660247	21.2225602487	3.32993843177	2.76375579036	11.256541963	16.5487340706	17.8352859801	15.331280063	2.36406139703	8.04859649834	50.5294422356	4.27604700586	1.5567623062	9.31131274062	6.85067343117	2.09244017563	1.13850275839	8.16150757862	0.916973219721	7.02352059902	3.18408400878	0.495168483024	11.9888023	39.353742987	3.97328285348	3.88720725472	12.6256272055	4.13413594048	16.7246486333	25.7976299895	23.7713179015	9.45407721753	0.931045256891	8.29790631354	3.58205065871
ALKBH8	1.15619110454	1.70961874097	1.94913629447	2.03353177605	1.37959782878	1.49788655271	1.21086528992	1.43743359317	0.90385890228	2.21977018489	2.34113611548	1.23620219911	1.52782890473	1.34610889765	2.40529935629	1.59036387491	1.75621860676	2.02148094939	1.45230989525	1.91600685942	1.73867673139	1.78206740827	3.9938533988	1.66261461357	0.877579406061	2.52786967463	1.66428296237	4.04394236449	0.849269047424	2.29653771974	2.10555565686	1.82103675858	1.53097059344	4.41582529055	1.25372773273	0.768666631355	1.22103369906	1.51311565687	0.553513150945	1.99391740626	1.21847726987	2.89165597094	1.35218802103	2.10609756148	1.89054298769	1.16524287528	0.845007253125	1.82554077881	2.09081377366
WEE2	0.0	0.136652033925	0.0482808353543	0.0310743628669	0.0	0.00619379435241	0.0122087396373	0.00567292205128	0.0536817986168	0.0101954837729	0.0122863153157	0.0226904443774	0.0224159597966	0.0	0.0554688892404	0.0	0.0480236494198	0.0253255942168	0.00663943743062	0.0	0.00657956373923	0.0243463973958	0.0543813076338	0.0119098865624	0.0312042637365	0.0351609064627	0.0365662330057	0.0263989266212	0.0350518246834	0.0557864616663	0.0616820100074	0.0184239852308	0.0169026955914	0.0	0.0320411877682	0.00850774070316	0.0	0.0	0.00791076670216	0.0388398362646	0.01741438193	0.0115358105204	0.00884672289048	0.0205319120748	0.0440001224253	0.00556921004087	0.0230353351155	0.0335216641361	0.015350722938
ANKK1	0.0339883164173	0.0805026704859	0.251919979523	0.164755123676	0.0	0.0	0.0359612702366	0.0133678324857	0.0451776051815	0.234243005643	0.209900678264	0.0106936797905	0.00880359929913	0.0314438544689	0.0326771112326	0.0399760106455	0.00943035609918	0.0	0.148630885884	0.22741158861	0.0465128050942	0.093227116202	0.0355960103214	0.0841943712877	0.147061202921	0.0138090242087	0.33030183504	0.178845614984	0.0550647345937	0.0328641953735	0.317951411766	0.0434147950665	0.0663833092192	0.0755808190987	0.0604022021607	0.280670300303	0.0217579559935	0.113010914448	0.0186411523289	0.0588363933385	0.143625081452	0.0407749607424	0.0312699985771	0.00604774661865	0.0518415607174	0.00656172129911	0.0	0.0329130786248	0.0180864368411
NSD3	2.59138583615	3.00993531169	6.56271015613	6.12629135186	2.15251114622	5.6571819917	4.12864241872	4.05884889407	10.3011657805	4.4637471722	6.52081322902	5.61672910603	2.67826824343	2.36337613676	5.74057058387	5.3090983338	4.85439266131	4.54522226957	3.60175245783	3.98365354387	4.21366918024	8.47755700325	6.0051561658	3.83277320993	5.27932073457	4.27395818073	4.06928685767	7.19353917911	4.78713079332	6.64598324139	5.08323792125	4.90856605335	5.15288294526	11.0901447483	4.40103822771	2.25726336576	3.40353947993	6.90436521485	8.35422088105	7.13461606469	7.48275051342	3.35585252073	2.42709888903	2.56201532218	5.7520347888	4.24730772052	6.81672610692	5.02553966685	2.74346415384
CLDN17	0.0	0.0	0.0	0.0	0.0	0.0	0.0	0.0	0.0	0.0	0.0	0.0	0.0	0.0	0.0	0.0	0.0	0.0	0.0	0.0	0.0	0.0	0.0	0.0	0.0	0.0	0.0	0.0	0.0	0.0	0.0	0.0	0.0	0.0	0.0	0.0	0.0	0.0	0.0	0.0	0.0	0.0	0.0	0.0	0.0	0.0	0.0	0.0	0.0
ACBD5	2.37976067375	16.0452080798	6.82015045499	4.13827311917	3.93038101199	5.06619786568	6.22421713057	3.81382334088	6.06593534323	6.29022628806	4.06542536792	4.43332661102	5.70878067221	2.11656850042	5.04333944569	5.12437399146	4.25990608801	2.80663467097	5.38886422631	7.86149178897	12.6295726983	3.40141897152	4.16798253456	5.17108691739	14.8551698998	11.3019991808	7.15295527149	5.7864623206	1.88600495306	5.06700480053	3.04530052634	3.29652978751	1.70451561967	7.59949487298	13.8310056961	1.79930054365	3.90124979427	8.04553596894	9.04663950523	6.57060683469	3.91467417322	8.51473719218	3.46319347774	8.28917351165	5.7351016356	3.40869036634	6.14613412502	4.46418812185	5.40728600901
SIPA1	9.88406319408	4.75838211279	16.1808653855	13.9407305221	36.6825935095	14.6436822579	16.538956072	21.8651584546	8.64025743127	41.6810074874	11.7947095169	8.90841644374	27.0103095003	40.2013700338	6.24228933694	20.5856006737	9.33634196088	13.5026776375	11.7989595406	13.6237008799	23.4924262846	18.3769482203	6.17311291221	25.3918883044	12.2957834151	48.4882076717	13.7207944226	16.296618071	7.65675310564	19.492821732	9.84384308563	16.2023793118	10.3765007	10.539158876	12.0946237497	9.47443002069	12.3889115115	20.4411983959	7.39554345744	14.5371201755	30.2351874063	10.1372705149	32.0548408858	6.6437976767	17.8761070698	11.9825589689	12.0148493287	18.1950906185	8.98310761578
SLC35G5	0.0267378186381	0.0	0.0639289010574	0.0840058507632	0.10524332838	0.0	0.0	0.0131452039356	0.0888504301753	0.0236248113768	0.0284696526732	0.063093520278	0.0173139674331	0.139140841255	0.0428438733194	0.157240992668	0.0741864198204	0.0146710151207	0.0307695957231	0.14427371913	0.060984238019	0.0282075406618	0.0280025540697	0.0275973980073	0.0578448153201	0.0543161921182	0.0564871255263	0.0458783768287	0.0270738418763	0.0129267493687	0.0178660704611	0.0426917629004	0.0130555516542	0.0619350769677	0.118792521736	0.0197140002213	0.0855823916291	0.0493905889032	0.0183307016467	0.102856051741	0.0269015508895	0.0534611900119	0.0	0.0	0.0254890943875	0.219383030202	0.0	0.0776758621656	0.0
ASPM	0.151770976941	0.068517060787	5.24435140639	2.46246333007	0.675467367841	6.50693488213	1.58531008794	3.15290925181	5.17000816588	0.309572936315	0.0997114576942	7.346860114	3.37911405945	0.797269020379	1.53159992411	1.14574506576	4.28717541496	2.49121026056	6.62951165984	5.75520369859	2.54098204022	8.30886919013	12.7954711327	1.87313617438	2.55338744554	1.68096274531	4.24672099841	7.93812803159	4.74277497665	3.8530033133	3.26462174499	1.2348508503	1.32446172404	5.92864775901	6.48115132183	0.138091723254	3.65030391092	0.706850310936	15.8665093459	11.8398066165	3.76552601686	7.58488453545	0.398596710698	6.53160284031	2.1856350811	0.469121679691	4.54796342442	0.881817746256	1.8966402017
SMIM3	6.66427517375	6.53207367582	18.2063794441	38.2391555273	33.7601565448	14.447043919	19.7431444686	72.9739198584	1.81190868671	21.3921907214	6.85402004806	14.4391090377	62.6226972564	20.2563885864	16.5033424208	30.0914105999	9.36087394717	25.6133904902	3.43369952067	33.1645066764	76.6047151171	10.2582793737	3.07732699042	47.3445492889	4.93145654211	15.9764429342	30.13417983	32.0005875373	34.2309025321	4.34228469049	30.1389423231	21.4870004272	27.8589740696	62.583105909	4.44968285387	3.7298854604	37.280783428	20.0463205531	4.84920161268	4.97433279861	26.9803463627	25.5369627525	30.8073581436	10.8677228725	18.3877091806	37.9983427781	21.9969423129	29.803193523	28.2797804669
IFRD1	4.51353586711	2.14573101398	13.7461136926	19.2104312876	2.67057630903	12.2352564308	5.60639132134	4.93885093735	15.9922279602	7.3864128931	5.03688562089	13.2159188932	9.37592141888	2.07527550092	6.11009183543	4.28059855158	5.63347739095	17.5559765056	3.58215779506	4.70547126336	3.61977567624	4.56509986836	8.49087618892	12.5666423	33.6328421246	7.28391269348	5.63457380022	4.83127059248	5.04543222297	2.27561536176	6.3249253187	9.63525839814	11.9497242892	5.36410364629	7.16366770461	2.51415495706	9.06014768262	13.9175906377	14.7830585704	12.2487854242	8.22821058744	3.10958485831	9.93661930483	6.1555804685	6.78907083266	3.97672904668	3.28593872549	4.41641919532	9.86640608642
CBY3	0.134983407978	0.0888093154659	0.753058023029	0.141365259692	0.0253005344478	0.28982223459	0.238031541591	0.154845478717	0.254180141458	0.0397558927755	0.0479088040527	0.0707826244477	0.116543954034	0.0780488540542	0.0720977791783	0.0441009238458	0.124841096284	0.0493768432469	0.207116616307	0.0728352546385	0.230904970002	0.261072467107	0.400543539326	0.116102429196	0.267688857139	0.159955996343	0.0950566787519	0.231612748245	0.136679790262	0.435063335441	0.180390413343	0.143683614755	0.175759324689	0.187604109572	0.424796761246	0.199048618795	0.0240030444463	0.207786522105	0.0	0.194722229164	0.11317499594	0.224911566897	0.241476090923	1.88144241686	0.107232782439	0.0	0.0449115673813	1.17641824877	0.0299290209639
NAT9	4.71058423	4.97597563674	9.96444181435	7.83454219544	6.92606035876	3.38540500437	7.20376094327	5.58813365321	10.461680625	9.56907843699	3.80821155454	6.45323299087	8.20762019578	8.16608704621	4.87830774823	7.9943135539	7.01298481201	5.88735626044	7.7749616062	7.94538068793	5.01884539571	6.08305472034	10.5474292906	11.6823589012	10.7193343022	7.66869443216	8.94272879502	8.40202399536	17.8160255629	11.6357952315	4.09769291	8.31521457607	5.27741897946	8.10685950945	3.88049092035	10.1300212424	8.58587536372	6.47776663678	6.61438174959	10.6460014497	9.88258934662	6.87646702106	11.6171018028	3.70585420056	6.61945926748	6.05014688336	8.01065299154	5.34716491412	5.05396867097
NOTO	0.00642427399434	0.0	0.00768007259884	0.0	0.00722477975319	0.00689676410067	0.0135943805129	0.0	0.0	0.0	0.0	0.0151594289355	0.0	0.0	0.0102940626873	0.0	0.0	0.0281999432149	0.0	0.0	0.00732631669908	0.0	0.0740096604559	0.0	0.0	0.0	0.00678605791381	0.00734877358927	0.0260200401009	0.0	0.00858533251331	0.0	0.00627369361046	0.00595243628042	0.00713554570814	0.0	0.0205628118119	0.0	0.0	0.00617828502863	0.0	0.00642253837812	0.0	0.0	0.0306212201582	0.0	0.0	0.0	0.0
IRAK3	0.503118135243	0.47735894801	0.261690566494	0.220270039288	4.84412671744	0.644355211348	1.83978347408	2.58111545494	0.322642343282	6.64628595593	4.00557398178	0.247162537837	0.695023220478	1.0554357315	0.169722381012	0.667883893169	0.803280824448	0.335147051037	2.30374276128	0.653447170721	1.6447837308	0.802678502767	0.325393932976	1.51050374522	0.0954780600733	3.01953832475	0.330059232037	8.38644407367	1.57479829316	1.17608222173	6.11259455157	1.55308357427	3.26688296462	0.372932866089	0.284312694621	0.400889436328	1.32409037314	3.95552509559	0.312246754989	0.419339671061	0.840112792231	0.0953018924508	1.49420831266	3.98769332977	0.770759741512	3.2104369298	0.239642089845	0.482073296109	0.648182895046
KCNU1	0.0	0.0	0.010638709788	0.0479307758809	0.0	0.0191072859791	0.00941570975809	0.0	0.0384436492164	0.0	0.00947553821651	0.0	0.0	0.0102911481368	0.0	0.00872240494305	0.0	0.0292976734307	0.0	0.00480185394232	0.0	0.00938829962567	0.0	0.0137778392924	0.00962622839984	0.0	0.0	0.00508989130686	0.0	0.00430240259916	0.0178390620401	0.00710453751467	0.0	0.639028303579	0.276763529477	0.0	0.0	0.0	0.237938880861	0.00427919010928	0.0358145111868	0.0	0.0	0.00791738257257	0.0509011242418	0.00429512520411	0.00888273630494	0.0344704170389	0.00591944607121
PRDM10	0.485086012119	1.01795298793	1.82575818232	1.2417387624	0.548528263824	1.12736591881	1.04904875906	0.746901917251	1.07699701634	1.58491072538	1.24301872151	1.84278118806	0.859502866557	0.576374963824	1.77665641175	1.35843624463	1.0981767806	1.24600891565	1.69616583765	1.01246793247	1.2522937485	2.97489937856	3.34965655835	0.929835724075	1.02637444799	1.67305102208	1.03043821205	2.103716757	1.93234336741	4.76258436053	1.63846911808	1.45968652622	1.16086434438	2.41028213082	1.51276476645	0.389100095826	1.00382789485	1.29977901724	2.24022144047	2.00702605505	1.10751281493	1.26034997505	0.563992603373	3.93393960785	1.5117945022	0.892760507316	1.35148165109	1.5408506618	1.13464685574
OR8J1	0.0	0.0	0.0	0.0	0.0	0.0	0.0	0.0	0.0	0.0	0.0	0.0	0.0	0.0	0.0	0.0	0.0	0.0	0.0	0.0	0.0	0.0	0.0	0.0	0.0	0.0	0.0	0.0	0.0	0.0	0.0	0.0	0.0	0.0	0.0	0.0	0.0	0.0	0.0	0.0158138785323	0.0	0.0	0.0	0.0	0.0	0.0	0.0	0.0	0.0
UBL5	67.8518811042	57.1333414055	53.6833097407	55.4407105852	89.708410275	80.3925254015	69.1391642292	42.32842122	62.5332548459	81.8916832337	29.7984821892	45.4140090483	84.8659221986	90.6915423717	65.0525641614	71.5870358878	32.7724848634	147.485830797	59.7175070901	55.6557277251	55.7267003255	36.7700922806	36.4933026044	108.698268842	79.3808804153	42.8429302567	65.2582436562	76.4445345456	84.1513261245	36.1245073625	51.5654855695	62.5143708561	54.7132815958	32.7349686456	72.4487660599	111.653716492	104.106399658	66.7992240391	80.946090694	87.0842200872	104.678490082	49.0168029237	167.864024159	51.9124037615	54.2817786869	33.4325850742	36.0406606413	64.4388922913	51.4781485464
LRRC63	0.013194119694	0.032552910273	0.0	0.0532976978347	0.0816100541489	0.127480642969	0.23034019742	0.0259466782203	0.61820582648	0.0233159326326	0.0140487154207	0.202372996588	0.230682583652	0.144950648514	0.0	0.012932097579	0.0366082407855	0.0144792013257	0.189795647881	0.121029320527	0.0677102732357	0.730767076485	0.428364808258	0.0	0.442436128535	0.0938105768616	0.0	0.415053351823	0.0400798040179	0.0318943517296	0.008816241718	0.0	0.00644242948642	0.0183375950708	1.24566850048	0.0	0.0351931077519	0.121862099255	0.687459515324	0.317222740824	0.292048140438	0.0	0.0809258685626	0.170208937521	0.100623365516	0.0254723226524	0.0658490481776	0.191650754428	0.0
AC011604.2	0.00467947249879	0.0	0.0	0.0	0.0	0.0	0.0	0.0	0.0	0.0	0.0	0.0	0.0	0.0	0.0	0.0	0.0	0.0	0.0	0.0	0.0	0.0	0.0	0.0	0.0	0.0	0.0049429976696	0.00535288251111	0.0	0.0	0.0	0.0	0.0	0.0	0.0	0.0	0.0	0.0	0.0	0.0	0.0	0.0	0.0	0.0	0.0	0.00451705138715	0.0	0.0	0.0
SLC30A3	0.026587983087	0.0320704432523	0.0423804340734	0.0159114460916	0.0132893406099	0.279091668973	0.0781426731973	0.145239330871	0.00589016819646	0.0339334966355	0.0031455680145	0.12547990341	0.0803457294349	0.0854080941683	0.274557702073	0.0231644196848	0.00409837155331	0.136162137993	0.0645940183218	0.216791897658	0.0707495712146	0.408275603803	0.114476483378	0.112820175845	0.0575206598646	0.0300065614705	0.0561705784027	0.0506903109658	0.720914634793	0.148538686456	0.963309350167	0.0707542055764	1.98774814211	0.0629566223991	0.269066651462	0.331081760826	0.0346715103369	0.0873134398676	0.0283546333434	0.0568220325986	0.190227895484	0.00590684443006	0.113247820206	0.551945399834	1.88688798675	0.265206378381	0.477701908989	0.0429114310475	0.0196506201544
STARD3	6.46176386614	5.883918344	10.9940581581	4.37803747572	14.2490550664	5.79431502259	12.0151956236	14.043288854	8.63225837796	21.3922529663	10.7541106004	11.134408612	10.7399714385	14.529464757	4.68349129683	10.5266597613	12.5016805288	8.5521697265	9.09035230361	11.4129738639	14.7342380595	6.53532091065	5.81753874825	11.908306656	8.79267817175	15.5948682359	13.040334816	9.11429080884	6.07512089079	7.92919791761	6.93396044262	14.2355724759	7.30965915286	9.04418244168	7.94508443159	24.5785825976	9.63664087609	13.7823672589	11.816474731	9.53874764839	19.3972511791	7.61994722271	15.5551517108	12.4661075888	7.87942744686	9.73945610556	19.7048631506	9.30647149513	8.04542545231
ITGB3BP	1.174335868	1.10785919978	4.08018101315	3.52549338795	2.65224589591	1.52812785961	2.06399377853	2.6624564301	5.08487642771	2.81269846267	1.60175043042	2.95176121186	3.41882190859	4.10026940674	2.84072381818	3.57670691033	2.35620703453	4.91344363227	4.65734947553	3.67974362431	1.94796547936	3.71665997091	5.65136579123	2.61450590282	4.71369813144	1.82698019428	4.06655048801	3.72654168293	4.31742722718	1.92064642837	4.72108048257	2.51038358057	2.54952036532	3.48007513387	4.92276841139	1.56949659685	5.01175125862	1.9660738645	4.06759914905	4.10057723147	3.71709062503	5.3041060858	1.52289876565	2.28816199737	2.23589878387	1.40838170411	4.75972939194	3.12021049841	3.86478562888
ASNSD1	18.4855123245	17.5471548689	14.814176075	21.1902314291	15.601608921	19.8980788576	28.5878828327	25.8461115275	22.3961915517	22.64601393	16.2659382226	27.7710849759	16.9345951739	10.7904722607	16.5337569861	18.0008910683	16.056152917	28.4591737831	10.5674760398	12.6803347136	18.241861488	16.2352307847	16.4717978944	16.8813581186	20.7892799349	17.4937726101	14.8553582951	19.3546592867	23.3740727183	17.4172150677	8.85983000573	19.4142155744	20.7039255223	13.6578222563	14.8840530304	12.490685042	23.8163594261	13.158430036	17.2617889467	22.735911255	16.1080019181	20.0317253523	18.6876704595	14.1621753911	21.6159277557	21.8810659423	13.5165164451	25.1060753443	7.38418510638
TDP2	11.5519869203	38.606946739	10.6384629782	10.3801311225	12.3792428421	7.85558214236	7.60272125981	10.1867567921	11.1278158391	9.7513516947	8.65774423529	8.61319697647	13.3653548064	9.72103288823	7.98818596525	14.6586920541	7.85401179881	14.5636053915	7.74158835263	16.4984534512	14.1411604565	5.30157614941	8.32365925299	8.8538085112	11.3119505917	11.3086902384	15.3318604245	12.2901800354	8.09402018827	10.4163930961	10.1234998516	12.1776175878	10.0389397861	8.87714131859	12.7609696233	16.4770534945	10.6194780141	12.6488865493	17.2536747885	11.0986335383	9.23015167243	10.6036462883	13.2148109756	10.8893347332	13.0336193275	11.0127442254	9.78050656623	12.2685647079	12.761008163
TNRC18	8.84140248572	6.81238160827	18.2072810391	20.0332695829	6.01104031621	21.2393761022	8.76457620586	15.634134122	21.233658423	8.65975334701	8.12625270236	14.1595863	12.336409751	5.19666595169	20.0060441119	9.72047924141	9.44768659133	8.52633257234	12.0788921341	10.5328398861	7.70870940526	28.3067348614	24.2803704771	16.8608302905	10.2885863432	11.4901439283	8.29913345816	12.5288949825	15.4514100232	22.6071325634	15.3955177798	13.2937487264	16.4150674336	16.6196552035	11.5599819169	9.3608555526	7.47280909905	8.87958480331	23.043791573	25.2600067974	12.6069671742	8.34187197968	5.79420239304	26.2575628761	19.3022249598	8.99962414836	5.19355193209	17.4974816585	8.45809082666
WRB	5.11571249169	9.10325443487	2.89831817832	5.47357085485	3.7842234247	5.631818397	3.21734446677	4.18655115052	5.65317176477	6.2326911065	3.4509337356	7.67783890375	2.20569602822	3.6891821899	7.68811645817	4.88331640368	3.39862364651	8.05831769735	8.34433458425	2.95925437394	6.15289595908	5.27958833326	5.20128800345	4.50618636584	8.00494239912	4.06653153711	2.2487882417	4.22718037211	8.44565769489	5.65008957352	2.64970733094	1.78583377245	5.78396172765	2.1109118998	5.74916104391	8.80880267536	5.01740500859	4.0734083979	5.96004393764	7.72504836533	2.96034675418	3.06224503659	2.7381896631	3.57605934325	4.34065106621	4.63756677328	9.64802766817	4.3231014921	2.21500602434
WDR59	2.65973329968	4.31188690739	3.211021073	3.98599062476	2.05523206888	1.37233893841	2.15174500915	1.82642019416	2.32450717975	3.03239949811	3.11341124193	2.19526990886	3.1751486182	2.10687174062	1.37857733521	3.22970695898	3.03975548241	2.71720684538	4.28381548489	1.85285920188	2.19526913714	2.08418159201	2.68150163357	2.02942659431	3.12845628851	3.07659548657	2.11654207771	4.80280026078	5.92912539538	6.61155897068	3.09604476138	5.060779536	3.60230133632	2.74746946336	2.00902872228	1.65562241362	1.99582945347	3.43121222827	3.54407637774	2.03153119802	2.77408467282	3.62780304508	1.33358479179	4.03390347965	1.99410637622	4.07819266204	4.00750653813	4.31987824827	2.78031456423
[truncated: 19,034 more rows]
[truncated: 216 more columns]
